# Supplementary material for: Regioselective Radical Alkylation of Arenes Using Evolved Photoenzymes
Source: Research Square preprint supplement (doi:10.21203/rs.3.rs-2602958/v1), 2023-02-23

## Regioselective Radical Alkylation of Arenes Using Evolved Photoenzymes

Claire G. Page<sup>1,2</sup>, Jingzhe Cao<sup>1,2</sup>, Daniel G. Oblinsky<sup>2</sup>, Samantha N. MacMillan<sup>1</sup>, Shiva Dahagam<sup>1</sup>, Ruth M. Lloyd<sup>3</sup>, Simon J. Charnock<sup>3</sup>, Gregory D. Scholes<sup>2</sup>, Todd K. Hyster<sup>1</sup>

Affiliations:

<sup>1</sup> Department of Chemistry and Chemical Biology, Cornell University, Ithaca, New York 14850,

United States

<sup>2</sup> Department of Chemistry, Princeton University, Princeton, New Jersey 08544, United States

<sup>3</sup> Prozomix. Building 4, West End Ind. Estate, Haltwhistle (UK)

\* Corresponding author. Email: [thyster@cornell.edu](mailto:thyster@cornell.edu).

## Table Of Contents

|                                                                            |     |
|----------------------------------------------------------------------------|-----|
| Part I. General Information .....                                          | 3   |
| Part II. DNA and Protein Sequences Information.....                        | 5   |
| Part III. Experimental Procedures .....                                    | 11  |
| Part IV. Directed Evolution Information.....                               | 13  |
| Part V. Reaction Condition Optimization.....                               | 28  |
| Part VI. Starting Materials Synthesis and Characterization.....            | 33  |
| Part VII. General Procedure for the Biocatalytic Alkylation of Arenes..... | 35  |
| Part VIII. Product Characterization .....                                  | 41  |
| Part IX. Product Derivatization and Characterization.....                  | 68  |
| Part X. Charge Transfer Complex Studies.....                               | 72  |
| Part XI. Transient Absorption Studies .....                                | 82  |
| Part XII. Mechanistic Studies .....                                        | 89  |
| Part XIII. Protein and X-Ray Crystallography.....                          | 110 |
| Part XIV. References.....                                                  | 121 |
| Part XV. NMR Spectra.....                                                  | 124 |



## **Part I. General Information:**

Unless otherwise noted, all chemicals and reagents for chemical reactions were obtained from commercial suppliers and used as received (Sigma-Aldrich, Oakwood Chemical, Combi-Blocks, Chem-Impex, New England Biolabs (NEB) and Acros Chemicals). GDH-105 was purchased from Codexis® as cell free lysate and used as received. Silica gel chromatography purifications were carried out using AMD Silica Gel 60. <sup>1</sup>H-, <sup>13</sup>C-, and <sup>19</sup>F- NMR spectra were recorded on a Bruker UltraShield Plus (500 MHz, 125 MHz, and 282 MHz respectively) instrument, and are internally referenced to residual proton signals in CDCl<sub>3</sub> (7.26 ppm). Data for <sup>1</sup>H-NMR are reported as follows: chemical shift (δ ppm), multiplicity (s = singlet, brs = broad singlet, d = doublet, t = triplet, q = quartet, m = multiplet, dd = doublet of doublet, dt = doublet of triplet, ddd = doublet of doublet of doublet), coupling constant (Hz), and integration. Data for <sup>13</sup>C NMR are reported in terms of chemical shift relative to CDCl<sub>3</sub> (77 ppm). High resolution mass spectra (HRMS) were obtained on a Thermo Fisher Scientific DART Mass Spectrometer. IR spectra were recorded on a Bruker Tensor II Infrared Spectrometer and peaks are reported in terms of frequency of absorption (cm<sup>-1</sup>).

**Chromatography.** Analytical high-performance liquid chromatography (HPLC) was carried out using an Agilent 1260 Infinity LCMS System and an Agilent 1260 Infinity LC system using XSelect Premier HSS T3 VanGuard FIT Column, 100Å, 2.5 μm, 4.6 x 100 mm. Semi-preparative HPLC was carried out using an Agilent 1260 Infinity LC system with the Phenomenex Synergi 4 μm Hydro-RP 80 Å LC column 250 x 10 mm.

### **LED Lamps.**

The cyan LEDs lamps were constructed in house from Chanzon High Power 50 W Cyan LED Chips(497 nm/1500 mA/DC30-34 V/50 W, measured photon flux = 12,000 mM/m2s) (Amazon 1DGL-JC-50W-490) powered by Mean Well HLG-320H-C1750A power supplies (320 W/183 V/1750 mA). Each LED chip was secured to a Nagulagu cooling aluminum LED heatsink equipped with a 12 V fan (Amazon B01K1Z6VP6).

**Cloning.** pET22b(+) and pET15a were used as a cloning and expression vector for all enzymes described in this study. Genes for 'ene' reductase enzymes were purchased as gBlocks from IDT and cloned using Gibson Cloning.<sup>43</sup> All genes were cloned between the NdeI and XhoI restriction sites and contained an N-terminal (GluER) or C-terminal (NostocER) 6xHis tag. Cloning for each construct was carried out using BL21 *E. coli*.

**Protein Expression and Purification.** Enzymes used in purified protein experiments were expressed in BL21(DE3) *E. coli* cultures transformed with plasmid encoding ERED variants. Transformed glycerol stocks were used to initiate 10 mL overnight cultures (37 °C, 250 rpm). Expression cultures (500 mL of Turbo Broth with ampicillin (100 μg/ml final concentration) in a

2L flask) were inoculated with 1-2 ml of the overnight culture and grown to  $OD_{600} = 0.6$  (37 °C, 250 rpm). Once the cell cultures reached an OD of 0.6 they were chilled on ice for 15 minutes prior to the addition of IPTG. For AspER, expression was induced with 0.1 mM IPTG (24 h 25 °C 250 rpm). Following expression, cells were pelleted and frozen at -80 °C for storage. GluER T36A was expressed using the addition of 4% (v/v) auto inducing mix (sterile filtered mixture of 1.25% glucose, 5% lactose and 15% glycerol). The pellets were kept at -80 °C for at least 24 hrs before thawing for purification. For purification, frozen cells were thawed in ice-cold water and resuspended in buffer A (for GluER: 50 mM TEOA 25 mM imidazole pH 7.0, for all other proteins reported herein: 20 mM KPi, 300 mM NaCl, 30 mM imidazole, pH 7.0). Lysozyme (1 mg/mL), DNase (0.1 mg/mL), FMN (1 mg/mL), and PMSF (1 mg/mL, added as a 35 mg/mL solution in absolute ethanol) were added to the resuspended cells, followed by shaking at room temperature for 30 minutes. The resuspended cells were disrupted by sonication (2 x 4 min, output control 5, 35% duty cycle; Sonicator QSonica Q500 Ultra Sonicator). To pellet insoluble material, lysates were centrifuged at 14,000 x g for 1.5 h at 4 °C. Proteins were purified using a nickel NTA column (5 mL HisTrap HP, GE Healthcare, Piscataway, NJ) using an AKTASart purifier FPLC system (GE healthcare). ERED enzymes were eluted with 100 % buffer B (for all proteins reported herein: 20 mM KPi, 300 mM NaCl, 250 mM imidazole pH 7.0) over 5 column volumes. Fractions containing enzyme were pooled, concentrated, and subjected to three exchanges with no-imidazole buffer (for GluER: 50 mM triethanolamine (TEOA), 10% glycerol, pH=7.0, for all other EREDs reported: 20 mM KPi, 300 mM NaCl, pH 7.0) to remove excess salt and imidazole. Concentrated (1.0-1.5 mM) proteins were aliquoted, flash-frozen in liquid N<sub>2</sub>, and stored at -80 °C until later use. Protein concentration was determined by absorbance at  $\lambda_{max}$  for oxidized flavin with calculated extinction coefficients. All proteins other than GluER, GluER mutants and AspER were used as aliquots pre-expressed and purified according to the procedures detailed in previously published work from the Hyster lab.<sup>44</sup>

**Determination of Extinction Coefficients.** Extinction coefficients for ERED enzymes were calculated based on the extinction coefficient ( $12.2 \times 10^{-3} \text{ M}^{-1}\text{cm}^{-1}$  at 464 nm) for free FMN released after protein denaturation.<sup>45</sup> (i). Extinction coefficient for GluER T36A:  $\epsilon_{464} = 11.4 \times 10^{-3} \text{ M}^{-1}\text{cm}^{-1}$ , PagER:  $\epsilon_{456} = 12.3 \times 10^{-3} \text{ M}^{-1}\text{cm}^{-1}$ , AspER:  $\epsilon_{464} = 11.4 \times 10^{-3} \text{ M}^{-1}\text{cm}^{-1}$

**Preparation of PagER Lysate.** The cells were resuspended in 50 mM TEOA pH = 7 and frozen. They were then thawed and lysozyme (1 mg/mL), DNase (0.1 mg/mL), FMN (1 mg/mL), and PMSF (1 mg/mL, was added as a 35 mg/mL solution in absolute ethanol) were added to the resuspended cells, followed by shaking at room temperature for 30 minutes. The resuspended cells were disrupted by sonication (2 x 4 min, output control 5, 35% duty cycle; Sonicator QSonica Q500 Ultra Sonicator). To pellet insoluble material, lysates were centrifuged twice at 14,000 x g for 1 h each at 4 °C. Lysates were aliquoted into 50 mL Falcon tubes (5 mL each) and flash-frozen in liquid N<sub>2</sub>. The frozen lysates were lyophilized for 24 h at room temperature. On average, 5 g of lysate was obtained from 4 L Turbo Broth expression media (Induced with autoinducing mix). The lysates were quantified by Stain-Free SDS page gel with a standard curve of purified GluER T36A of a known concentration.

## **Part II. DNA and Protein Sequences Information:**

### **GluER T36A**

#### DNA Sequence

ATGCCGACCCTTTTCGACCCCATCGATTTCTGGACCTATCCACGCCAAGAATCGTATCGTCA  
TGTCCCCCTGACTCGCGGTCGCGCTGACAAAGAGGCGGTTCCAGCTCCCATTATGGCTG  
AATACTACGCCCAACGCGCTTCGGCGGGTTTAATTATCACTGAAGCGACGGGGATTTACG  
CGAAGGCTTAGGTTGGCCGTTTTCGCGCCGGAATTTGGTCCGATGCACAGGTTGAGGCGTG  
GAAACCTATCGTCGCGGGTGTCCATGCAAAGGGCGGCAAGATCGTATGTCAGCTTTGGCA  
TATGGGCCGTATGGTACATTCTTCAGTTACAGGGACGCAGCCCGTAAGCAGTTCCGCCACT  
ACTGCTCCAGGTGAGGTTACACCTATGAGGGCAAGAAGCCCTTCGAACAAGCGCGTGCA  
ATCGATGCTGCAGACATCTCCCGCATCCTTAACGATTACGAAAATGCAGCACGTAATGCAA  
TCCGCGCGGGTTTCGATGGAGTGAGATCCACGCAGCCAATGGCTACCTTATCGATGAGTT  
TTTTCGTAACGGAACCAATCATCGCACCGATGAGTATGGGGGGGTGCCGGAGAACCGTAT  
TCGTTTCTTGAAAGAGGTAACAGAACGCGTCATCGCGGCGATTGGCGCTGACCGTACGGG  
TGTGCGTCTGAGTCCAAACGGTGACACACAGGGTTGTATCGACAGTGCTCCCGAAACCGTT  
TTTGTTCTCGCCGCAAAGCTTTTGCAAGATTTAGGGGTAGCGTGGCTTGAGCTGCGTGAAC  
CTGGTCCGAATGGTACGTTTGGAAAGACGGATCAACCAAAATTATCTCCACAAATCCGTAA  
GGTATTCCTTCGTCCATTGGTCTTAAATCAAGACTATACTTTTGAGGCGGCACAGACGGCCC  
TGGCTGAGGGCAAGGCGGACGCTATTGCGTTTGGCCGTAAGTTCATTTCAAATCCAGACTT  
GCCTGAGCGCTTTGCCCCGTGGCATCGCACTGCAACCAGACGATATGAAAACATGGTACTC  
CCAAGGCCAGAGGGTTACACAGACTATCCATCCGCAACTTCTGGGCCGAACAAT

#### Protein Sequence

MPTLFDPIDFGPIHAKNRIVMSPLTRGRADKEAVPAPIMAEYYAQRASAGLIITEATGISREGLGWPF  
APGIWSDAQVEAWKPIVAGVHAKGGKIVCQLWHMGRMVHSSVTGTQPVSSSATTAPGEVHTYEG  
KKPFEQARAIDAADISRLNDYENAAARNAIRAGFDGVQIHAANGYLIDFLRNGTNHRTDEYGGVPE  
NRIRFLKEVERTERVIAAIGADRTGVRLSPNGDTQGCIDSAPETVFPAAKLLQDLGVAVWLELREP  
GPN GTFGKTDQPKLSQIRKVFRLPLVLNQDYTFEAAQTALAEGKADAIAFGRKFISNPDLPERFARGIAL  
QPDDMKTWYSQGPEGYTDYPSATSGPNN

### **PagER**

#### DNA Sequence

CCGACCCTTTTCGACCCCATCGATTTCTGGACCTATCCACGCCAAGAATCGTATCGTCATGT  
CCCCCTGCTGCGCGGTCGCGCTGACAAAGAGGCGGTTCCAGCCCCATTATGGCTGAAT  
ACTACGCCCAACGCGCTTCGGCGGGTTTAATTATCACTGAAGCGACGGGGATTTACGCG  
AAGGCTTAGGTTGGCCGTTTTCGCGCCGGAATTTGGTCCGATGCACAGGTTGAGGCGTGGA  
AACCTATCGTCGCGGGTGTCCATGCAAAGGGCGGCAAGATCGTATGTCAGCTTTGGCATAT  
GGGCCGTATGGTACATTCTTCAGTTACAGGGACGCAGCCCGTAAGCAGTTCCGCCACTACT  
GCTCCAGGTGAGGTTACACCTATGAGGGCAAGAAGCCCTTCGAACAAGCGCGTGCAATC  
GATGCTGCAGACATCTCCCGCATCCTTAACGATTACGAAAATGCAGCACGTAATGCAATCC

GCGCGGGTTTCGATGGAGTGCAGATCCACGCAGCCAATGGCTACCTTATCGATGAGTTTTT  
 GCGTAACGGAACCAATCATCGCACCGATGAGTATGGGGGGGTGCCGGAGAACCGTATTC  
 GTTCTTGAAAGAGGTAACAGAACGCGTCATCGCGGCGATTGGCGCTGACCGTACGGGTG  
 TGCGTCTGAGTCCAAACGGTGACGTGTGGGGTGTATCGACAGTGCTCCCGAAACCGTTTT  
 TGTTCTGCCGCAAAGCTTTTGCAAGATTTAGGGGTAGCGTGGCTTGAGCTGCGTGAACCT  
 GGTCCGAATGGTGATTTTATGAAGACGGATCAACCAAAATTATCTCCACAAATCCGTAAGG  
 TATTCCTTCGTCCATTGGTCTTAAATCAAGACTATACTTTGAGGCCGCACAGACGGCCCTG  
 GCTGAGGGCAAGGCGGACGCTATTGCGTTTGGCCGTAAGTTCATTTCAAATCCAGACTTGC  
 CTGAGCGCTTTGCCCGTGGCATCGCACTGCAACCAGACGATATGAAAACATGGTTCTCCCA  
 AGGCCCAGAGGGTTACACAGACTATCCATCCGCAACTTCTGGGCCGAAC

#### Protein Sequence

PTLFDPIDFGPIHAKNRIVMSPLLRGRADKEAVPAPIMAEYYAQRASAGLIITEATGISREGLGWPFAP  
 GIWSDAQVEAWKPIVAGVHAKGGKIVCQLWHMGRMVHSSVTGTQPVSSSATTAPGEVHTYEGKK  
 PFEQARAIDAADISRILNDYENAARNAIRAGFDGVQIHAANGYLIDFLRNGTNHRTDEYGGVPENR  
 IRFLKEVERTERVIAIGADRTGVRLSPNGDVWGCIDSAPETVFPAAKLLQDLGVAWLELREPGPNGD  
 FMKTDQPKLSPOIRKVFLRPLVLNQDYTFEAAQTALAEGKADAIAFGRKFISNPDLPERFARGIALQP  
 DDMKTWFSQGPEGYTDYPSATSGPN

#### **NostocER Y219F**

#### DNA Sequence

ATGAGTGATGAAGCGGAGCGCCAACGTGGAAATAATCTTTACAAAAATTCGCCCCTTCTGC  
 CTGTCTCTATAAGTCAGGTATCTACAAGCCAGTTGCGGGAGACCGAAATAATGAGTACCAA  
 TATAAACTTGTTTCAGCAGTTACCAATTGGGTGAGTTAGAATTACCCAATCGCATAGTGATGG  
 CACCTCTGACTCGCCAACGGGCTGGAGAGGGTAATGTGCCCCACCAATTAAACGCGATAT  
 ATTACGGCCAACGCGCCTCTGCCGGTCTGATCATAGCCGAAGCAACTCAAGTGA CTCTC  
 AAGGACAAGGTTACCCTCATACTCCCGGCATACATTCTCCAGAGCAAGTAGCAGGTTGGA  
 AACTGGTAACTGATACAGTTCATCAACAAGGAGGTCGCATTTTCCTTCAACTGTGGCACGT  
 GGGACGGATAAGCCACCCAGACTTACAACCAGACGGTGGACTGCCAGTAGCCCCCAGTG  
 CCATAGCTCCCAAGGGGGAAGTTTTGACCTACGAGGGTAAAAAGCCATACGTAACACCTA  
 GAGCCTTGACACCTCGGAGATCCCGGCCATAGTGGAACAGTATCGGCAAGGGGGCCGCA  
 AACGCCTTGCCGCGGGGTTTCGACGGTGTGAAATACACGCCGCTAACGGGTTCTTATA  
 GACCAATTTCTTCGCGACGGAACGAACCAAAGAACGGACGAATACGGCGGAGCCATCGA  
 AAATCGCGCCCGGTTATTGTTAGAGGTCACAGAGGCTATTACTTCTGTATGGGATTCTCAAC  
 GCGTAGGGGTGAGACTGTCTCCAAGTGGCACATTCAACGACATCCGGGATAGTCATCCTTT  
 AGAGACCTTTGGTTACGTAGCACAGGCTTTGAATCGTTTTAACTTAAGTTATCTTCATATCTT  
 CGAAGCAATTGATGCAGATATTCGGCACGGGGGTACGGTGGTCCCAACATCTCACTTACGT  
 GATCGGTTACACGGCACCTTGATTGTTAATGGGGGTACACTCGGGAGAAAGGGGACACA  
 GTAATCGCCAACAAAGCCGCTGACCTTGTTGCTTTGGAACCTTATTTATATCGAACCCGGA  
 CCTGCCTGAACGTTTGGAGGTAAATGCTCCGTAAATCAAGCAGACCCGACTACGTTTTAT  
 GGGGGCGGGGAGAAGGGCTACACAGATTATCCTTTTCTTGCTGTAGCAAATAAGCTCGAG  
 CACCACCATCACCACCACTGA

#### Protein Sequence

MSDEAERQRGNNLYKNSPLLVSISQVSTSQLRETEIMSTNINLFSSYQLGELELPNRIVMAPLTRQR  
AGEGNVPHQLNAIYYGQRASAGLIIEATQVTPQGQGYPHTPGIHSPEQVAGWKLVTDTVHQQG  
GRIFLQLWHVGRISHPDLPDGGPLVAPSAIAPKGEVLTYEGKKPYVTPRALDTSEIPAIVEQYRQGA  
ANALAAGFDGVEIHAANGFLIDQFLRDGTNQRTEYGGAIENRARLLLEVTEAITSVWDSQRVGVR  
LSPSGTFNDIRDSHPLETFGYVAQALNRFNLSYLHIFEADADIRHGGTVVPTSHLRDRFTGTLIVNGG  
YTREKGDTVIANKAADLVAFGTLFISNPDLPERLEVNAPLNQADPTTFYGGGGEKGYTDYPFLAVANK  
LEHHHHHH\*

#### OYE1

#### DNA Sequence

ATGAGCTTTGTCAAGGACTTCAAGCCACAAGCACTTGGTGATACAAACCTTTTTAAACCAAT  
TAAGATTGGCAACAACGAACTGTTACATCGTGCAAGTTATCCCCCTCTTACACGTATGCGTG  
CTTTCACCCAGGTAATATTTCCCAACCGTGATTGGGCGGTAGAATACTATACTCAACGCGC  
CCAGCGCCCCGGGCACGATGATCATTACGGAAGGGGCATTTATCAGCCCCCAAGCTGGCG  
GGTATGATAACGCACCCGGTGTGGTCCGAAGAACAGATGGTGGAGTGGACGAAAATTTT  
CAATGCAATCCACGAAAAAAATCGTTTGTCTGGGTACAGTTATGGGTCCTGGGTTGGGCG  
GCATTTCTGACAATTTGGCCCGCGACGGGTACGCTACGATAGCGCATCTGACAACGTCT  
TTATGGATGCCGAGCAAGAGGCTAAGGCGAAGAAAGCCAACAACCCTCAGCACTCCTTGA  
CAAAAGATGAAATTAACAGTACATTAAGGAGTACGTGCAGGCTGCAAAAAACAGCATTGC  
TGCAGGTGCAGACGGTGTAGAGATTCACTCGGCTAATGGGTACCTGCTTAATCAATTTTTAG  
ATCCTCACTCGAACACACGTACCGACGAATATGGGGGATCTATTGAGAATCGCGCTCGTTT  
TACGTTGGAAGTGGTAGATGCATTGGTCGAGGCGATCGGGCACGAAAAAGTCGGATTACG  
TTTATCTCCTTATGGCGTGTAAATTCAATGTCAGGCGGAGCGGAGACTGGAATTGTCGCAC  
AGTACGCTTACGTGGCGGGAGAGCTGGAAAAACGTGCAAAGGCTGGAAAACGCCTGGCA  
TTTGTACATTTAGTGGAACCGCGTGTGACGAATCCTTTTCTTACTGAGGGGGAGGGCGAGT  
ACGAAGGAGGGAGCAATGATTTTCGTGTATAGTATTTGGAAGGGTCCTGTTATTCGCGCTGG  
CAATTTTCGATTGCACCCAGAGGTGGTTCGTGAAGAAGTGAAAGATAAACGCACGTTGAT  
CGGCTACGGCCGTTTCTTTATTAGTAACCCAGACTTGGTGGACCGTTTAGAGAAAGGTCTTC  
CCTTGAACAAATATGATCGTGACACCTTTTATCAGATGTCGGCGCACGGATACATTGATTAC  
CCGACCTATGAAGAGGCTTTAAACTTGGTTGGGATAAGAAG

#### Protein Sequence

MSFVKDFKPOALGDTNLFKPIKIGNNELLHRAVIPPLTRMRALHPGNIPNRDWAVEYYTQRAQRP  
MIITEGAFISPOAGGYDNAPGVWSEEQMVEWTKIFNAIHEKKSFWVWQLWVLGWAAFPDNLARD  
GLRYDSASDNVFMDAEQEAKAKKANNPQHSCLKDEIKQYIKEYVQAAKNSIAAGADGVEIHSANG  
YLLNQFLDPHSNTRTDEYGGSIENRARFTLEVVDALVEAIGHEKVGLRLSPYGVFNSMSGGAETGIV  
AQYAYVAGELEKRAKAGKRLAFVHLVEPRVTNPFLTEGEGEYEGGSNDFVYSIWKGPIRAGNFAL  
HPEVREEVKDKRTLIGYGRFFISNPDLVDRLEKGLPLNKYDRDTFYQMSAHGYIDYPTYEEALKLW  
DKK

## MorB

### DNA Sequence

ATGCCCCGACACTTCTTTTTCGAATCCAGGACTTTTTACTCCTCTTCAGTTGGGTAGTCTGTCT  
CTTCCAAATCGTGTGCATAATGGCACCTTTAACCCGCTCACGCACGCCAGATTCTGTACCTG  
GACGCCTTCAACAGATATACTATGGTCAACGCGCCAGCGCCGGGTTAATCATCTCCGAAG  
CGACAAATATCAGTCCCACCGCTCGGGGATACGTATACACGCCAGGCATTTGGACTGACG  
CTCAGGAGGCGCGGTTGGAAAGGTGTGGTTCGAAGCTGTCCATGCTAAAGGGGGTTCGTATAG  
CGTTGCAGTTATGGCATGTGCGGCCGGGTCTCTCATGAGCTGGTGCAGCCAGACGGCCAAC  
AACCCGTGGCACCATCCGCCTTAAAAGCCGAAGGGGGCCGAGTGCTTTGTCGAATTCGAGG  
ATGGGACTGCTGGCCTGCACCCTACGTCAACTCCCAGAGCCCTGGAGACAGATGAGATAC  
CCGGTATTGTTGAAGATTACAGACAGGCCGCGCAGCGTGCGAAGCGGGCCGGATTTCGATA  
TGGTAGAGGTCCACGCGGCAAATGCTTGTCTTCTTAATCAGTTCTTGGCGACAGGAACCAA  
TCGTCGCACAGACCAGTACGGTGGATCAATTGAGAACCGGGCTAGATTCCCATTAGAGGTT  
GTCGATGCTGTAGCCGAGGTATTCGGGCCCCGAAAGAGTGGGGATACGGCTGACTCCTTTC  
CTGGAGTTATTTGGATTAAACGGATGATGAACCCGAGGCAATGGCTTTTTACCTTGCGGGAG  
AATTAGACCGGCGTGGTTTAGCGTATTTACACTTTAATGAACCCGATTGGATAGGTGGGGA  
CATCACGTACCCGGAAGGGTTTCGTGAGCAAATGCGTCAACGGTTCAAGGGGGGGCTTAT  
ATATTGTGGAAACTACGACGCAGGTCGGGCCCAAGCCCGGCTTGACGACAATACAGCAGA  
TGCAGTGGCGTTTGGGCGTCCATTTATTGCCAACCCCGACTTGCCAGAACGTTTCCGCTTA  
GGAGCAGCGCTGAACGAACCTGACCCCTCTACTTTTTACGGCGGGGCAGAGGTGGGGTA  
CACAGACTACCCGTTCTGGACAACGGTCATGACCGCCTGGGACTCGAGCACCACCA  
TCACCACCACTGA

### Protein Sequence

MPDTSFSNPGLFTPLQLGSLSLPNRVIMAPLTRSRTPDSVPGRLQQIYYGQRASAGLIIEATNISPTA  
RGYVYTPGIWTD AQEAGWKGVVEAVHAKGGRIALQLWHVGRVSHEL VQPDGQQPVAPSALKA E  
GAECFVEFEDGTAGLHPTSTPRALETDEIPGIVEDYRQAAQRAKRAFDMVEVHAANACL PNQFL  
ATGTNRRTDQYGGSIENRARFPLEVDAVAEVFGPERVGIRLTPFLELFLTDDEPEAMAFYLAGEL  
DRRGLAYLHFNEPDWIGGDITYPEGFREQMRQRFKGGLIYCGNYDAGRAQARLDDNTADAVAFG  
RPFIANPDLPERFRLGAALNEPDPSTFYGGAEVGYTDYPFLDNHGDRLG

## YersER

### DNA Sequence

ATGAAGACGGCTAAGTTATTCAGTCCTCTTAAGGTGGGCGCGTTGACCCTGCCTAATCGGG  
TTTTCATGGCTCCGCTTACGAGACTTCGGTCTATTGAACCTGGGGACATTCCAACCCCTTA  
ATGGCTGAGTACTACCGCCAACGTGCCTCGGCGGGGTTAATAATAACCGAAGCGACCCAA  
ATAAGCTTCCAGGCGAAAGGTTACGCCGGTGCGCCGGGCTTACACACGCAGGAACAATTA  
AACGCTTGGAAGAAGATTACGCAAGCTGTCCACGAGGAAGGTGGACACATTGCCGTTT CAG  
TTATGGCACGTGGGCCGCATCTCGCATAGCTCGCTGCAGCCAGGACAACAAGCACCAGTG  
GCCCCCTCCGCGATTGCGGCTGATACGAGAACGACGGTACGCGATGAGAATGGGGGCATG

GGTACGTGTCCCCTGCTCGACGCCACGCGCGTTGGAGACTGAGGAGATACCTGGTATTAT  
AAATGATTTCCGTCAGGCAACCGCTAACGCTAGAGAGGCAGGCTTTGATTACATAGAATTA  
CACGCCGCGCATGGTTACCTGTTGCATCAGTTTATGAGTCCTGCTAGTAATCAGCGGACAG  
ACCACTACGGAGGGTCCATAGAAAATCGGACCCGGTTGACGTTGGAGGTCGTCGACGCC  
ACCGCAGCCCAATGGTCCGCCGAGCGGATAGGCATCCGTATAAGTCCACTTGGTCCTTTTA  
ATGGGCTTGACAACGGGGAAGACCAGGAGGAGGCCGCGCTGTATTTAATCGATGAACTGA  
ACAAACGGCATATCGCTTATCTGCATATCTCAGAACCGGACTGGGCAGGAGGGAAGCCTT  
ACAGTGAAGCGTTCAGAGACGCAGTCCGTGCTCGTTTCAAAGGGGTAATCATTGGCGCAG  
GAGCATATACCGCCGAGAAAGCAGAGGAAGTATAGAGAAGGGCTTCATTGACGCGGTGG  
CTTTTGGACGTTTCATATATCTCCAACCCAGACCTTGTGGCGAGATTACAGCAGCATGCCCC  
CTTGAATGAACCAGATGGAGAAACGTTTTACGGAGGAGGGGCAAAGGATATACTGATTAT  
CCTACACTGCTCGAGCACCACCATCACCACCACTGA

#### Protein Sequence

MKTAKLFSPLKVGALTLPNRVFMAPLTRLSIEPGDIPTPLMAEYYRQRASAGLIITEATQISFQAKGY  
AGAPGLHTQEQLNAWKKITQAVHEEGGHIAVQLWHVGRISHSSLQPGQQAPVAPSAIAADTRTTV  
RDENGAWVRVPCSTPRALETEEIPGIINDFRQATANAREAGFDYIELHAAHGYLLHQFMSPASNQR  
TDQYGGSIENRTRLTLEVVDATAAQWSAERIGIRISPLGPFNGLDNGEDQEEAALYLIDELNKRHIAY  
LHISEPDWAGGKPYSEAFRDAVRARFKGVIIGAGAYTAEKAEELIEKGFIDAVAFGRYSINPDLVARL  
QQHAPLNEPDGETFYGGGAKGYTDYPTL

#### **NCR**

#### DNA Sequence

ATGCCGTCACTGTTTCGATCCAATCCGCTTTGGGGCTTTCACTGCAAAAAATCGTATCTGGAT  
GGCGCCGTTAACACGGGGTCCGGCAACCCGTGACCATGTCCCAACAGAGATAATGGCTG  
AATACTATGCCCAACGCGCATCCGCGGGCTTGATCATCAGCGAGGCGACCGGGATCAGC  
CAAGAGGGCCTGGGCTGGCCCTATGCACCAGGAATCTGGAGTGATGCGCAGGTCGAGGC  
ATGGTTACCCATAACCCAAGCGGTACACGATGCCGGAGGTTTGATATTTGCACAACTGTGG  
CACATGGGGCGTATGGTGCCTTCCAACGTTTCTGGAATGCAACCTGTGCGACCTAGCGCTT  
CACAAGCGCCCGGCTTGGGCCATACTTATGATGGCAAAAAGCCATACGATGTAGCCAGAG  
CATTGAGACTTGACGAGATCCCACGGCTGCTGGACGACTATGAAAAGGCAGCTCGGCACG  
CACTGAAAGCTGGGTTCGATGGAGTTCAGATTCATGCTGCCAACGGATACCTGATTGACGA  
GTTTCATCCGGGATTCAACAAATCATAGACACGACGAATACGGGGGGGCGGTTGAGAACAG  
AATACGGTTATTGAAGGATGTCACTGAGCGGGTTATCGCAACCATCGGAAAGGAGCGCAC  
AGCAGTGCGTTTAAGTCCGAATGGAGAGATACAAGGCACAGTAGACTCGCATCCAGAACA  
GGTATTTATCCCGGCTGCAAAGATGTTATCTGATTTAGATATCGCGTTCCTTGGGATGCGCG  
AGGGTGCTGTAGACGGGACATTTGGCAAAACAGACCAGCCCAAACCTTTGCCCCGAGATCC  
GTAAAGTTTTCAAGCCACCCCTTGTCTGAATCAAGATTACACTTTGAGACTGCCCAGGCT  
GCGTTAGATTCGGGTGTAGCCGATGCAATCAGTTTTGGTCGTCCATTCATTGGGAATCCCG  
ACTTACCGAGAAGATTCTTTGAAAAGGCACCGTTAACTAAGGACGTAATTGAGACTTGGTA  
CACTCAGACTCCCAAAGGTTACACCGACTATCCACTGTTAGGTGATCTCGAGCACCACCAT  
CACCACCACTGA

#### Protein Sequence

MPSLFDPIRFGAFTAKNRIWMAPLTRGRATRDHVPTEIMAEYYAQRASAGLIISEATGISQEGLGWP  
YAPGIWSDAQVEAWLPITQAVHDAGGLIFAQLWHMGRMVPSNVSGMQPVAPSASQAPGLGHTY  
DGKKPYDVARALRLDEIPRLDDYEKAARHALKAGFDGVQIHAANGYLIDEFIRDSTNHRHDEYGG  
AVENRIRLLKDVTERVIATIGKERTAVRLSPNGEIQGTVDSHPEQVFIPAAKMLSDLDIAFLGMREGAV  
DGTFGKTDQPKLSPEIRKVKPPLVLNQDYTFETAQAALDSGVADAISFGRPFIGNPDLPRRFFEKAP  
LTKDVIETWYTQTPKGYTDYPLLGDHHHHHH

#### AspER

#### DNA Sequence

ATGGCCTTACCTGACGTTGAGAATACTCCGGCCGCTGGTATTCCTTATTTACCCCCGGCTCA  
GAATCCACCAGCCGGGACTGCGGCAAATCCGCAGACAAGCGGTAATGCGGTGCCGAAAC  
TGTATACTCCGCTCACCGTCCGTGGGGTTACCTTCCATAACCGTCTGGGGTTAGCGCCACT  
TTGCCAGTATAGTGCCGAAGACGGCCATATGACCGATTACCATATTGCCACCTTGGTGGG  
ATAGCGCAGCGGGGGCCAGGATTAATGATGATCGAAGCAACCAGCGTTAGCCCAGAAGG  
TCGTATCACGCCTCAGGACGTCGGCTTGTGGAAAGATTCCCAGATAGCCCCTATGAAACG  
CGTGATAGACTTTGTCCACAGTCAATCCCCAAAAAATCGGGGTCCAGATCGCCCATGCTGGC  
CGCAAAGCAAGCAATATCGTCCATGGCTTATGAATAAAGGGATCGTAGCAACCGAGAAG  
GTAGGCGGTTGGCCGGACCGTGTTATAGGCCCATCGACGGTTCATTTTCATGAAACATTCC  
CTACACCGAAAGCAATGACTAAAGATGACATCGAGCAGTTTAAACGTGACTGGTTTGACGC  
GTGCAAACGAGCGATAGCGGCCGGCGCAGATTTTCATTGAAATTCACAACGCTCACGGTTA  
TCTGCTGTCAAGTTTTCTCTCGCCAAGTTCGAATACCCGTACGGATGAGTACGGAGGCTCA  
TTCGAAAACCGTATTTCGCTTATCACTTGAAATTGCTCAGGTGACAAGAGATGCCGTCGGTC  
CGAACGTACCGGTGTTTCTGCGAGTGTCAGCTACAGATTGGATAGAGGAAACGTTGCCAG  
AGGAGTCGTGGAAATTGAGCGACTCGGTCAGATTTGCTGAAGCTCTGGCAGCTCAGGGCG  
CCATCGATTTAATTGACGTGTCAAGCGGTGGGGTGCACGCAGCGCAAAAGATCAAATCCG  
GTCCGGCATTTCAGGCGCCTTTTGGCGTCGCAATTAAGAAAGCCGTTGGCGATAAACTCCT  
GGTCGCCACCGTGGGTACGATCACGAACGGGAAGCAGGCAAATAAACTTTTAGAAGAAGA  
AGGTCTGGATGTGGCTCTGGTCGGCCGTGGGTTCAGAAAGATCCAGGCTTGGCCTGGAC  
TTTTGCCCAACACTTGATGTTGAAATTGCAATGGCCTCCCAAATTCGTTGGGGCTTCACTC  
GCCGAGGAGGAACTCCCTATATTGACCCGAAAGCGTACAAGGAGTCTATTTTGAACTCGA  
GCACCACCACCACCACCACTGA

#### Protein Sequence

MALPDVENTPAAGIPYFPAQNPPAGTAANPQTSIGNAVPKLYTPLTVRGVTFHNRLGLAPLCQYSA  
EDGHMTDYHIAHLGGIAQRGPGLMMIEATSVSPEGRITPQDVGLWKDSQIAPMKRVIDFVHSQSQ  
KIGVQIAHAGRKASNIAPWLMNKGIVATEKVGGWPDRVIGPSTVPFHETFTPAMTKDDIEQFKR  
DWFDACKRAIAAGADFIHNAHGYLLSSFLSPSSNTRTDEYGGSFENRIRLSLEIAQVTRDAVGNV  
PVFLRVSATDWIEETLPEESWKLSDSVRFAEALAAQGAIDLIDVSSGGVHAAQKIKSGPAFQAPFAV  
AIKKAVGDKLLVATVGTITNGKQANKLLEEEGLDVALVGRGFQKDPGLAWTFAQHLDVEIAMASQI  
RWGFTRRGGTPYIDPKAYKESIFE



### Part III. Experimental Procedures:

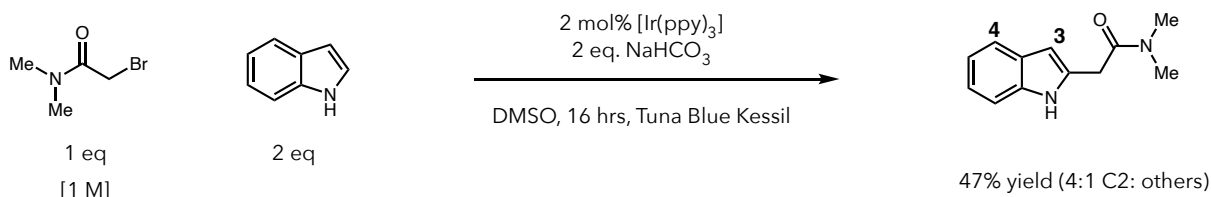

Supplemental Figure 1: Photoredox procedure for indole alkylation

The procedure was adapted from O'Brien et. al.<sup>46</sup> 2 equiv, of indole, 2 equiv of  $\text{NaHCO}_3$ , and 2 mol% of  $\text{Ir}(\text{ppy})_3$  were added to a shell vial with a stir bar and a septa was put on.. The solids were degassed thoroughly. Degassed, dry DMSO was added to the vial such that the final concentration of  $\alpha$ -bromodimethylacetamide would be 1M.  $\alpha$ -bromodimethylacetamide was then added and the solution was degassed with nitrogen. The vial was then sealed and placed under a 34W Tuna Blue Kessil for 16 hours. The reaction became solid and the solids were dissolved  $d_6$ -DMSO so that a crude regioisomeric ratio was taken. The crude reaction was then columned over silica gel to yield the C2 regioisomer as the major regioisomer.

Supplemental Table 1: EREDs screened

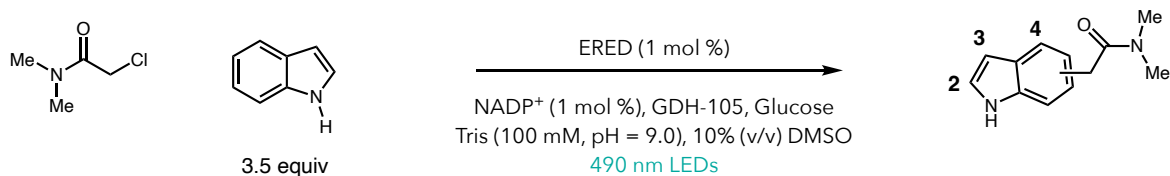

| ERED                                  | C2 yield (%) | C3 yield (%) | C4 yield (%) |
|---------------------------------------|--------------|--------------|--------------|
| GluER T36A                            | 21%          | 10%          | 19%          |
| NostocER Y219F                        | 40%          | 3%           | 9%           |
| OYE1                                  | <1%          | 4%           | n.d.         |
| MorB                                  | 15%          | <1%          | 2%           |
| YersER                                | 16%          | 2%           | 5%           |
| NCR                                   | 14%          | 7%           | 2%           |
| AspER                                 | 50%          | <1%          | <1%          |
| GluER T36A<br>6x EtOAc<br>extractions | 29%          | 22%          | 32%          |

Reaction conditions:  $\alpha$ -chloroamide ( 2 mg, 20  $\mu$ mol), 3.5 equiv. of arene ( 70  $\mu$ mol), 1 mol% ERED, 1 mol% NADP<sup>+</sup>, 1 mg GDH and 6 equiv of glucose (120  $\mu$ mol) was irradiated with Cyan LEDs for 24 hours. Yield of each regioisomer was determined by NMR using 1,3,5-trimethoxybenzene as standard.

#### **Part IV. Directed Evolution Information:**

##### **DNA preparation of site saturated mutagenesis libraries**

Site saturation mutagenesis primers were designed and mixed using the 22 codon trick described in Kille et al.<sup>47</sup> The primer mix was then used in a standard PCR reaction with an extension time of 3 minutes and 30 seconds with Phusion® polymerase from NEB with the purified parent plasmid as the template DNA. The PCR product was digested with DpnI to cleave the DNA and gel purified. A Thermo Scientific™ NanoDrop™ One Microvolume UV-Vis Spectrophotometer was used to check the DNA concentration of the purified PCR product. 50 ng – 100 ng of the purified PCR product was recircularized using NEBuilder® HiFi DNA assembly. The recircularized DNA was then transformed into BL21(DE3) *E. coli* electrocompetent cells and plated on to LB Aga plates containing ampicillin at (100 µg/mL). Concurrently, the parent DNA was transformed to ensure all wells in the plates started from similar growth phases.

##### **Protein Expression in 96 well plates for site-saturated mutagenesis.**

A 96 deep-well plate was prepared containing 500 µL of LB + ampicillin (100 µg/mL). Each well was inoculated with a single colony from the LB Agar plates with the colonies of BL21(DE3) *E. coli* containing the site saturated mutagenesis DNA with sterile toothpicks. A well containing a single colony with the parent DNA was placed throughout the plate (A2, B4, C6, D8, E10, F12, G2, H4). This was to identify the ratio of products under the plate conditions as well as a baseline yield. The deep well plate was shaken at 30°C and 250 rpm overnight. The next day 50 µL of the overnight culture was used to inoculate another 96 deep well plate where each well contains 950 µL of Terrific Broth + ampicillin (100 µg/mL) + 4% (v/v) auto inducing mix (sterile filtered mixture of 1.25% glucose, 5% lactose and 15% glycerol). The overnight culture was also used to create a glycerol stock by mixing 50 µL of overnight culture with 50 µL of 50% (v/v) glycerol. This plate (the expression plate) was shaken at 30°C and 250 rpm for 24 hours. After 24 hours the cells in the plate were centrifuged at 4000 x g for 10 minutes. The supernatant was removed and the pelleted cells in the plate were frozen at -80°C until use.

##### **Lysis and Screening for indole and quinoline alkylation with GluER T36A mutants**

The frozen expression plate was allowed to come to room temperature. Then the pellet in each well was resuspended in 100 µL of lysis buffer (100 mM Tris pH 9 for indole reaction and 100 mM KPi pH 8 for quinoline reaction) containing 1 mg/mL lysozyme, 0.1 mg/mL DNase and 200 mM PMSF). The pellets were resuspended and shaken at 37° C for 30 minutes. The lysate was spun down at 4000 x g for 10 minutes to remove cellular debris . 100 µL of the supernatant was removed to a clear bottom, white microtiter plate.

The microtiter plate was brought into the Coy Chamber and 100 µL of turnover mix was added to each well (3.72 mg/mL glucose, 0.67 mg/mL GDH-105, 0.2 mg/mL FMN, 0.29 mg/mL NADP+). 0.5 mg of chloroamide was added to each well using 5 µL of DMSO. 1.86 mg of indole was added using 5 µL of DMSO. The plate was sealed using adhesive film and removed from the Coy Chamber. The plate was then irradiated for 16 hours using a Lumidox 96-well Cyan LED array with active cooling base from Analytical Sales and Services Inc. The reaction mixture

was moved to a 96 deep-well plate and quenched using 1000  $\mu\text{L}$  of ACN and allowed to either shake for 1 hour at room temperature or sit in a 4°C fridge for 4 hours. The deep well plate was centrifuged at 4000  $\times$  g for 20 minutes to remove precipitated protein. 200  $\mu\text{L}$  of the supernatant was filtered through a Millipore 96-well plate into a clear shallow-well 96 well microtiter plate. The regioisomeric ratio and relative yield compared to control were assessed using a LC using the XSelect Premier HSS T3 VanGuard FIT Column, 100Å, 2.5  $\mu\text{m}$ , 4.6  $\times$  100 mm (40-95% ACN in  $\text{H}_2\text{O}$  for 4 minutes). Promising wells were identified using a simple data filtration function coded in Python (data was filtered for yield greater than or equal to the control and having a better product area/undesired product area than the control well). An overnight culture was seeded from the glycerol stock of that well to have the DNA extracted and sequenced. The wells were then expressed using the standard GluER T36A protocol in 2L baffled flasks and purified using the standard procedure for hit confirmation using the general procedure for the biocatalytic alkylation of heterocycles.

## Maximum Diversity Plate

The Maximum Diversity plate was grown from the glycerol stock that was prepared as described in Nicholls et. al.<sup>48</sup> It was expressed using the same protein expression protocol, lysis, and screening protocol as the site saturation mutagenesis plates. GluER T36A Y343F was identified as the best mutant from this plate and was used as the parent round. Further verification was found using purified protein from shaken flask expression.

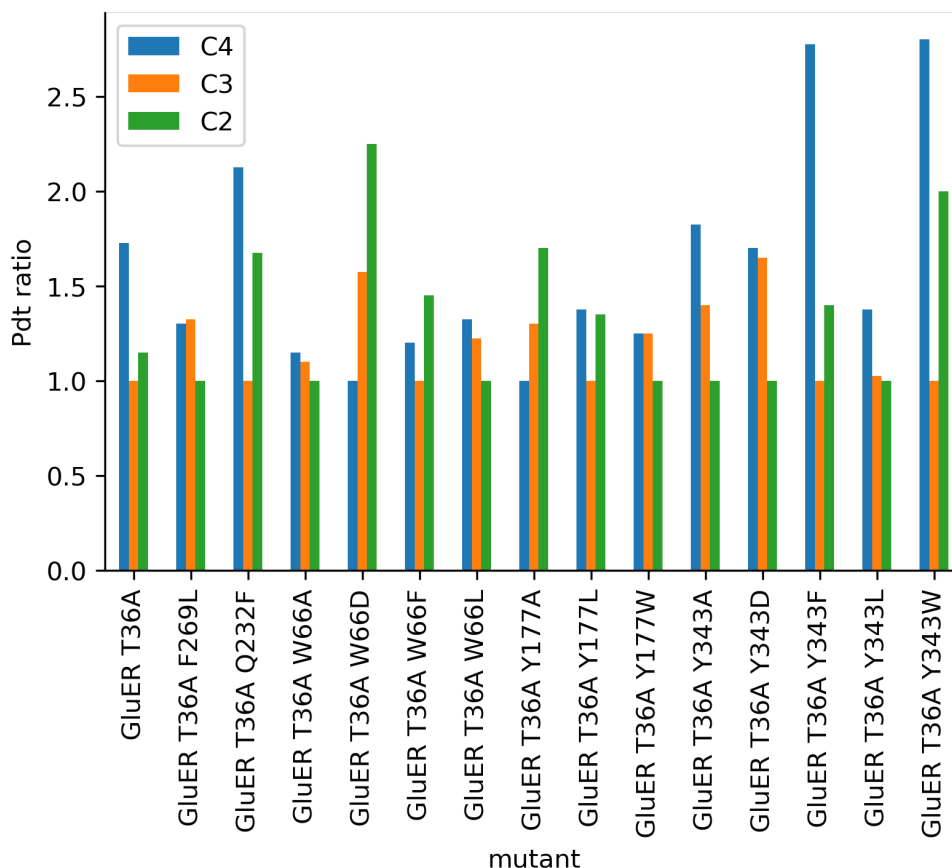

Supplemental Figure 2: Ratio Results from Maximum Diversity Plate

## Site Saturation Mutagenesis for Indole Alkylation **Round 1**

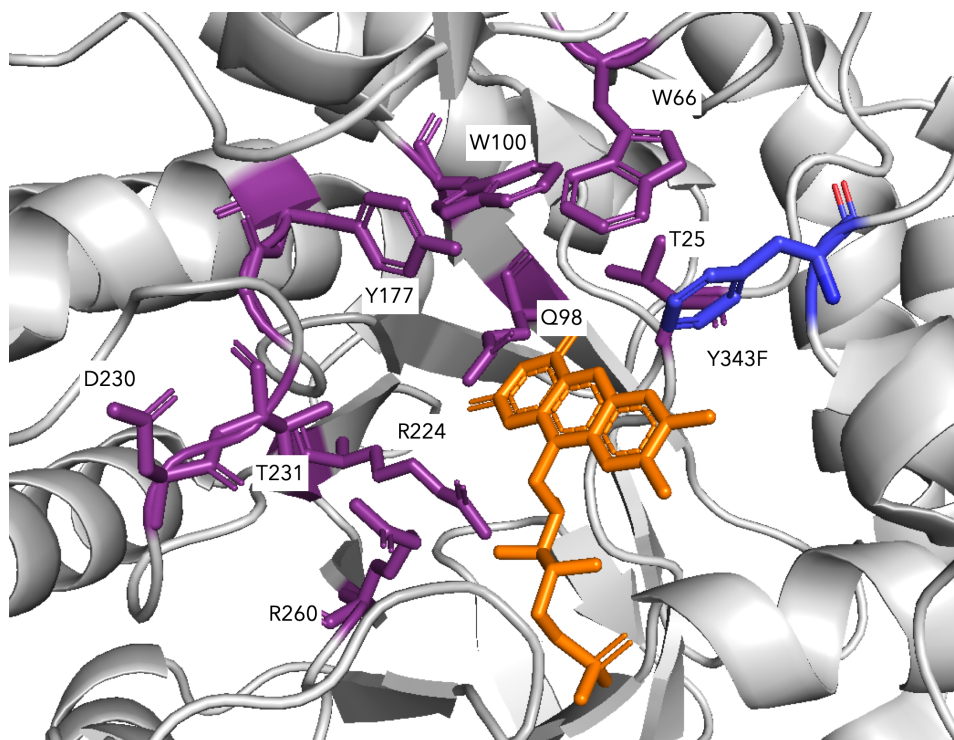

| Template         | Sites Targeted                                                 | Hits Identified           |
|------------------|----------------------------------------------------------------|---------------------------|
| GluER T36A Y343F | R224, Y177, T231, D230, W100, Q98, W66, G176, R224L, R260, T25 | T25L, T231V, D230L, T25V, |

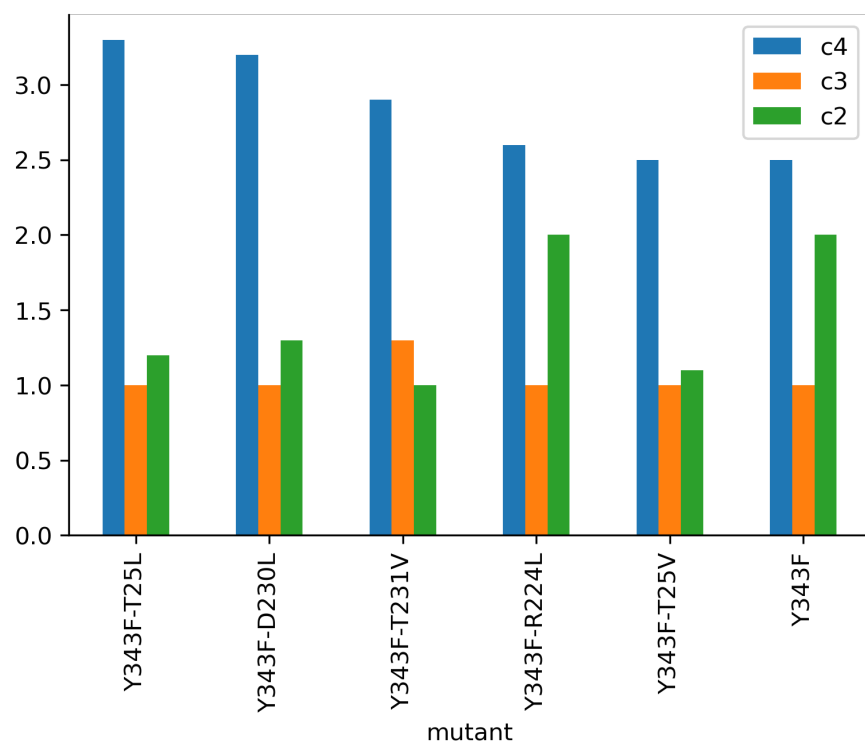

Supplemental Figure 3: Round 1 Hit Ratios Summary

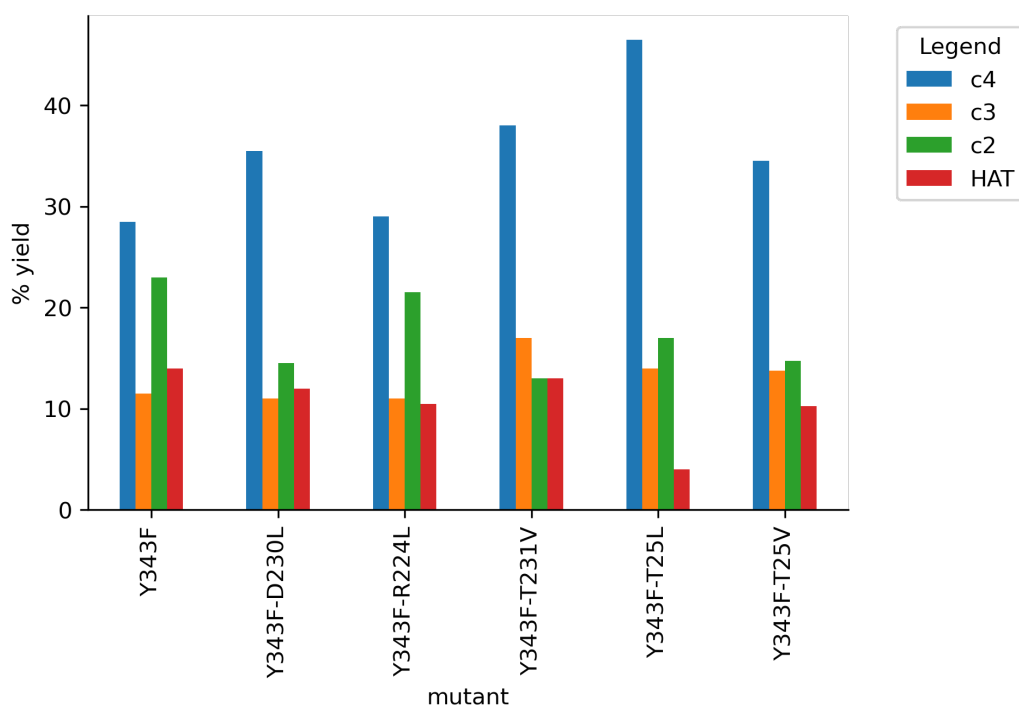

Supplemental Figure 4: Round 1 Hit Product Yield Summary

## Site Saturation Mutagenesis for Indole Alkylolation **Round 2**

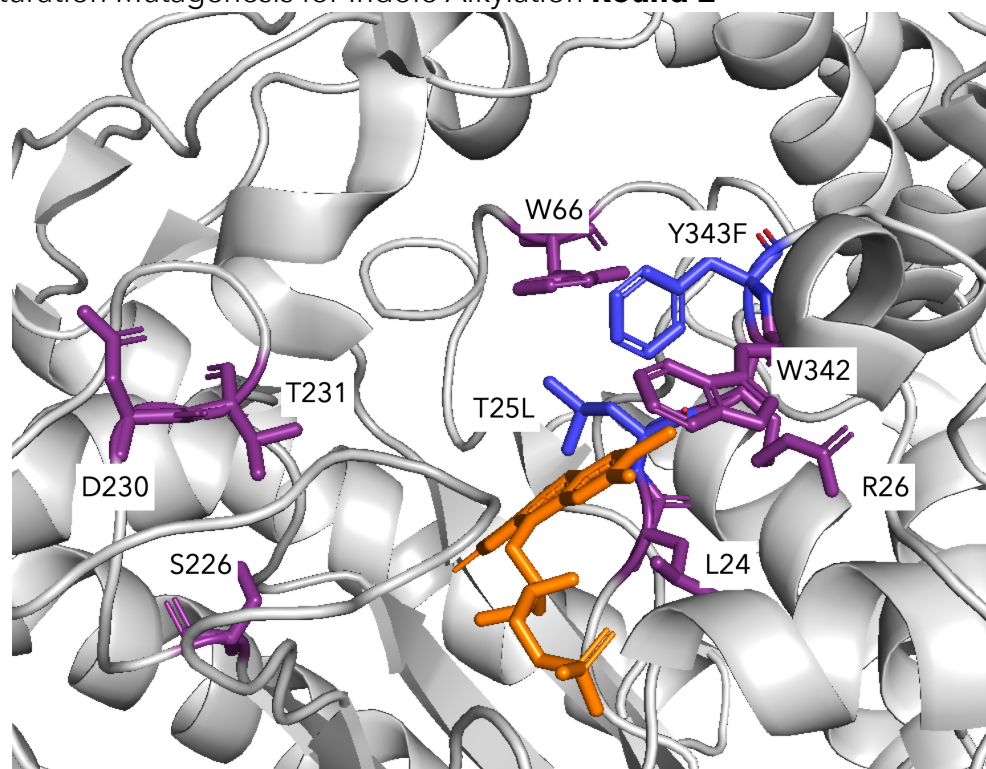

| Template              | Sites Targeted                        | Hits Identified            |
|-----------------------|---------------------------------------|----------------------------|
| GluER T36A Y343F T25L | T231, S226, R26, L24, D230, W66, W342 | T231V, D230W, D230E, D230A |



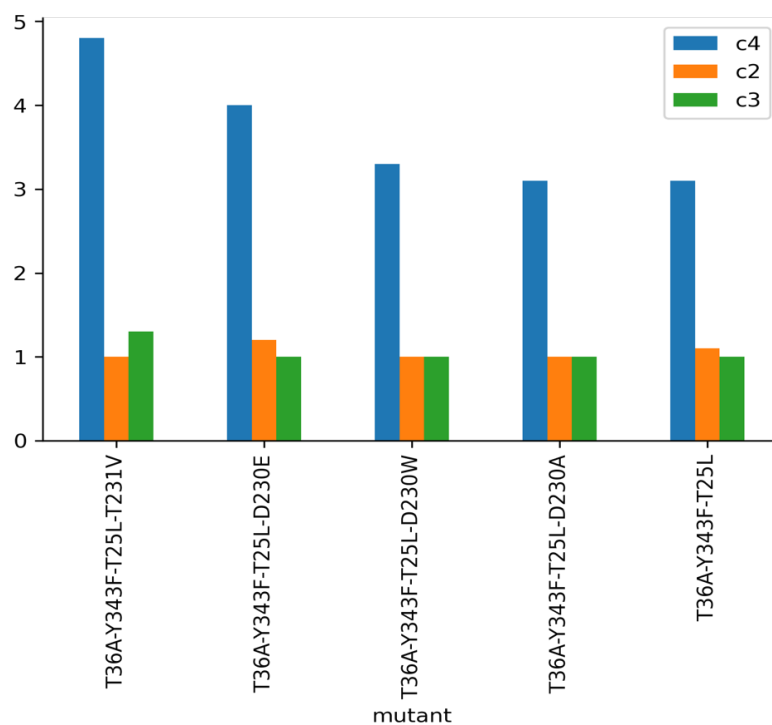

Supplemental Figure 5: Round 2 Hit Ratios Summary

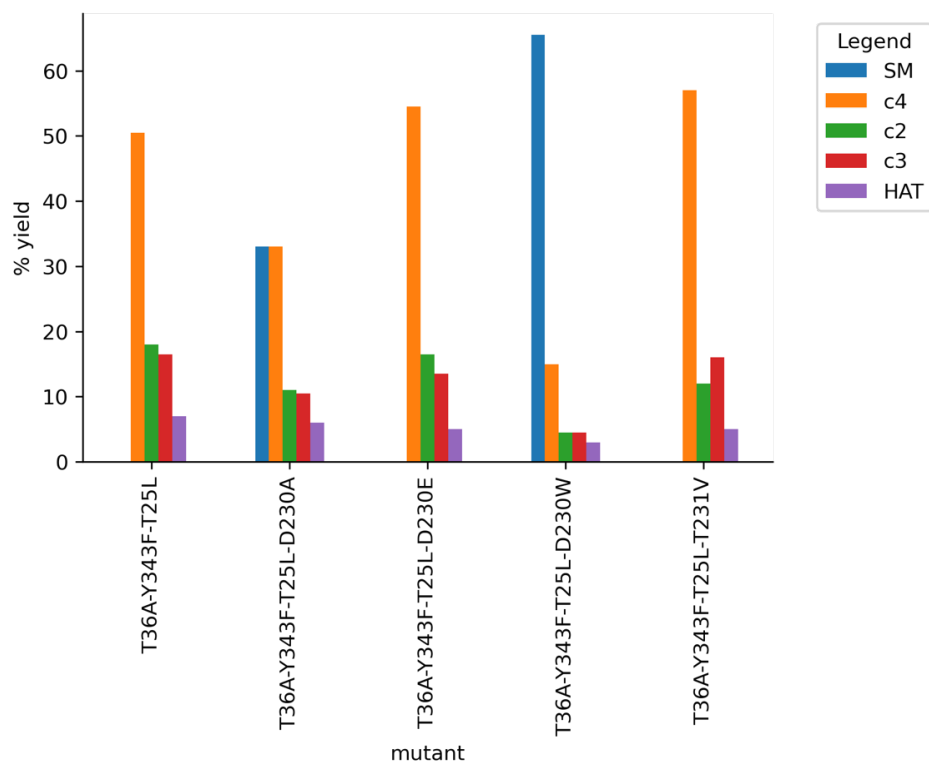

Supplemental Figure 6: Round 2 Hit Yields Summary

# Site Saturation Mutagenesis for Indole Alkylation **Round 3**

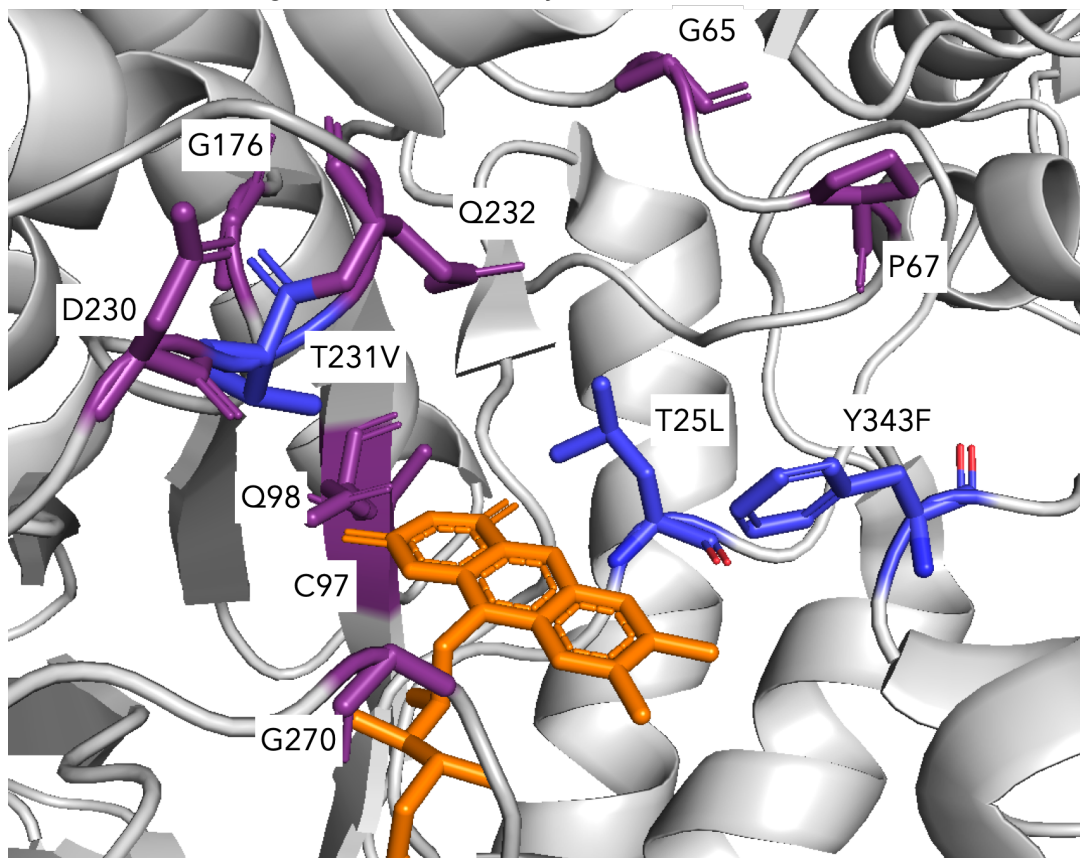

| Template                    | Sites Targeted                                    |  |  | Hits Identified                  |
|-----------------------------|---------------------------------------------------|--|--|----------------------------------|
| GluER T36A Y343F T25L T231V | G65, G176, C97, G270, P67, Q98, D230, Q232, R228, |  |  | G270L, G270M, Q232W, C97W, Q232H |

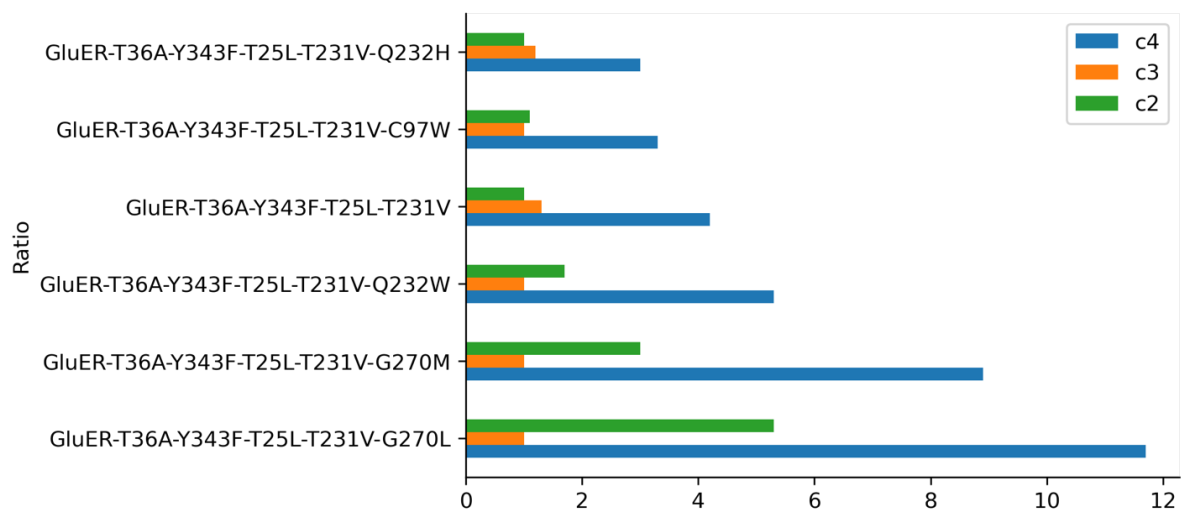

Supplemental Figure 7: Round 3 Hit Ratios Summary

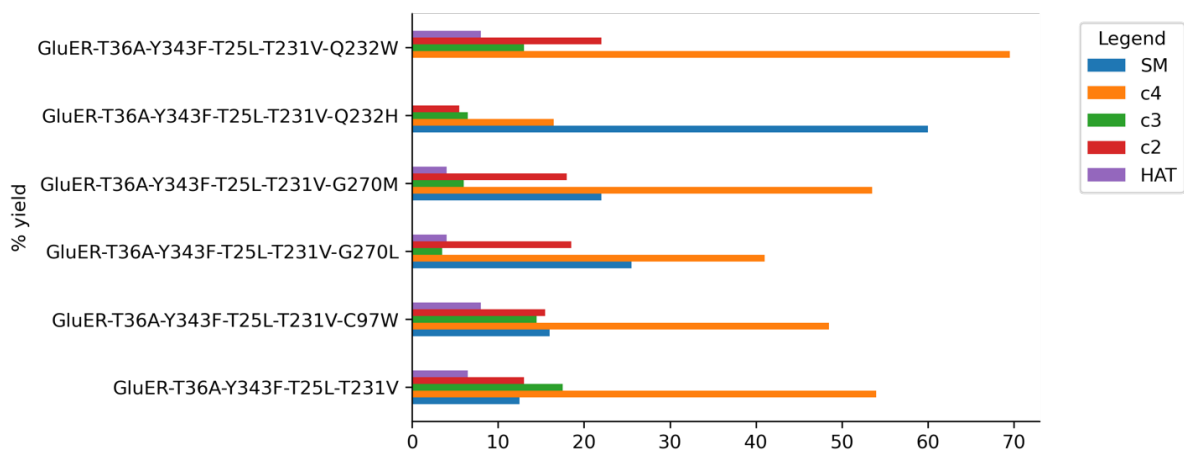

Supplemental Figure 8: Round 3 Hit Yields Summary

# Site Saturation Mutagenesis for Indole Alkylation **Round 4**

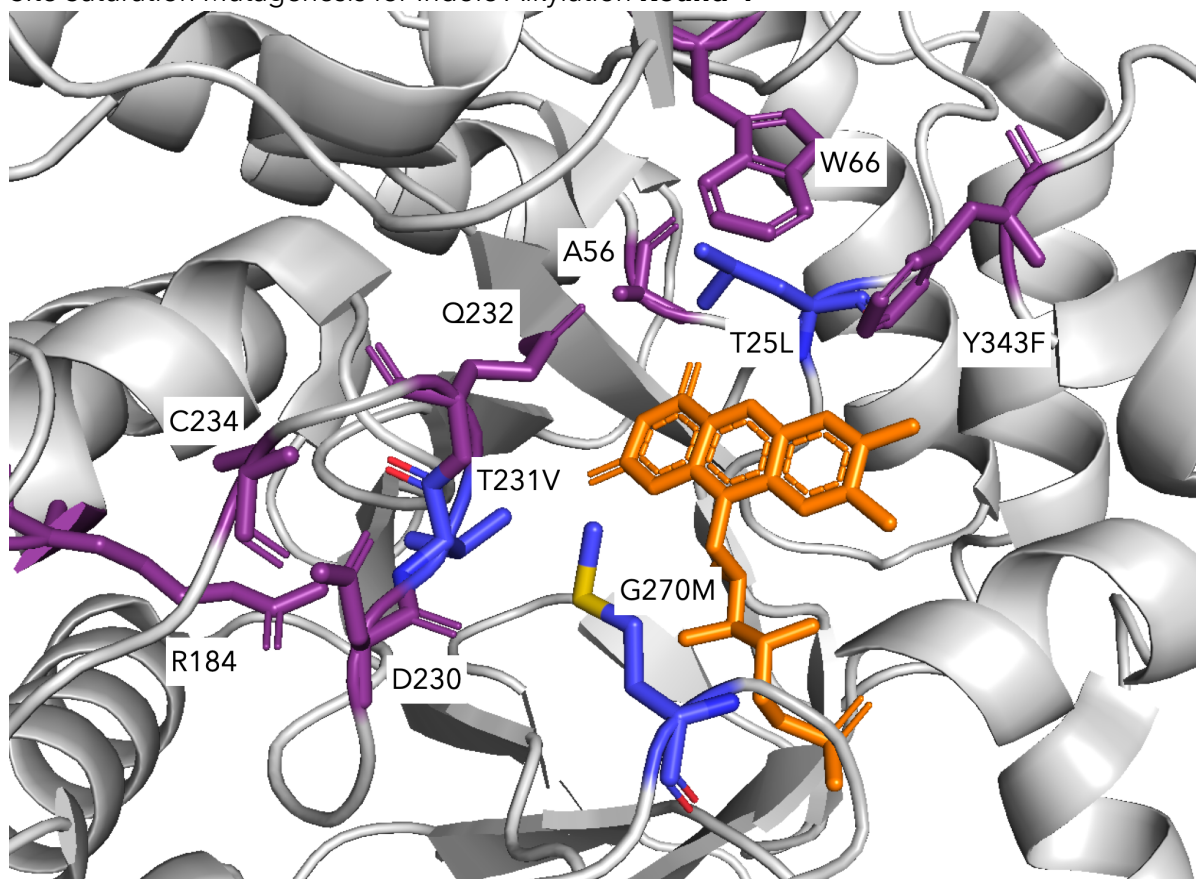

| Template                             | Sites Targeted                      | Hits Identified                     |
|--------------------------------------|-------------------------------------|-------------------------------------|
| GluER T36A Y343F T25L<br>T231V G270M | Q232, F343, D230, R184,<br>A56, W66 | G270L, G270M, Q232W,<br>C97W, Q232H |

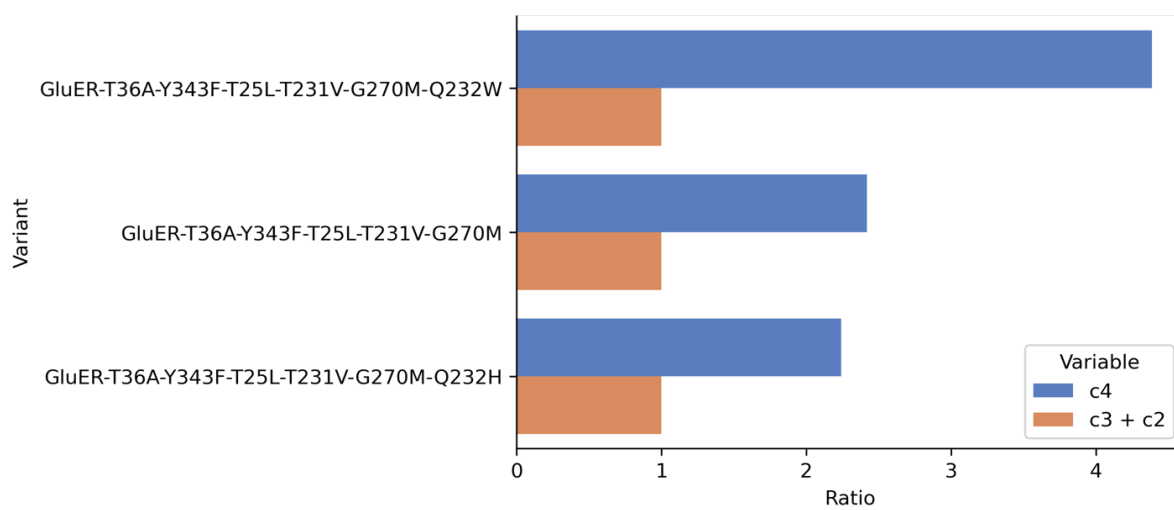

Supplemental Figure 9: Round 4 Hit Ratios Summary

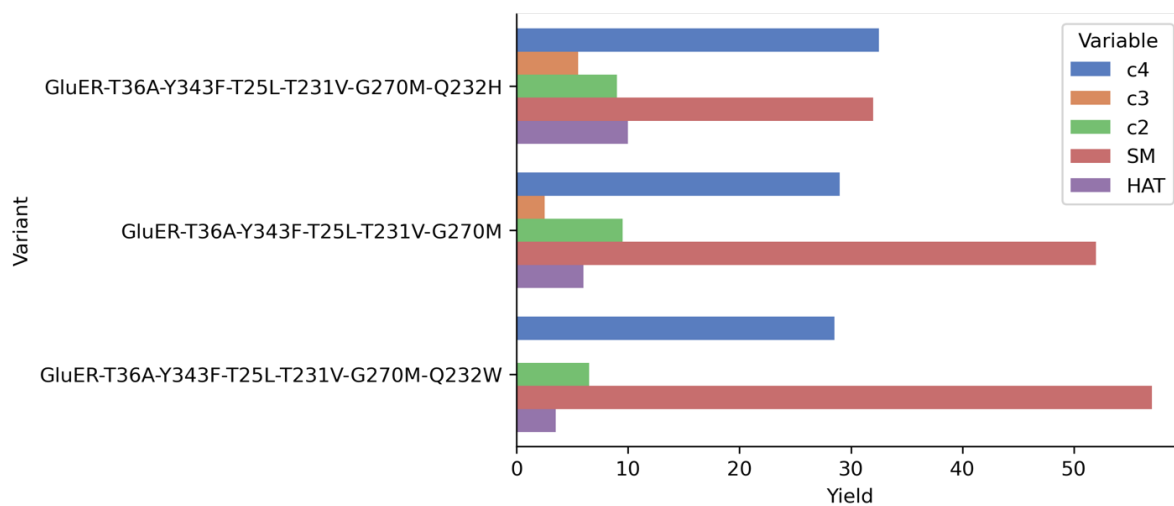

Supplemental Figure 10: Round 4 Hit Yields Summary

Site Saturation Mutagenesis for Indole Alkylation **Round 5**

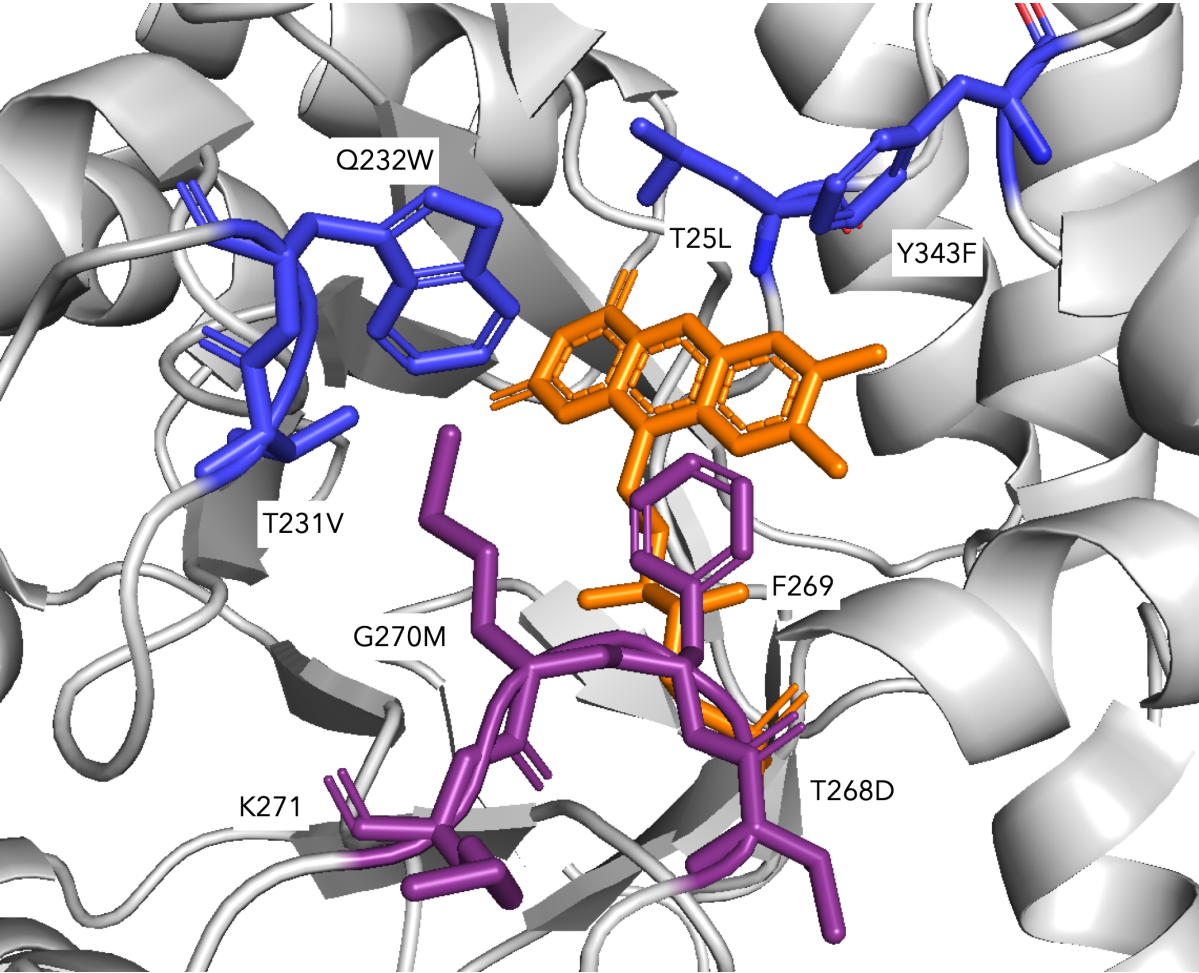

| Template                                                       | Sites Targeted |  |  | Hits Identified            |
|----------------------------------------------------------------|----------------|--|--|----------------------------|
| GluER T36A Y343F T25L M270, F269, T268, K271 T231V G270M Q232W |                |  |  | M270S, M270A, T268N, T268D |

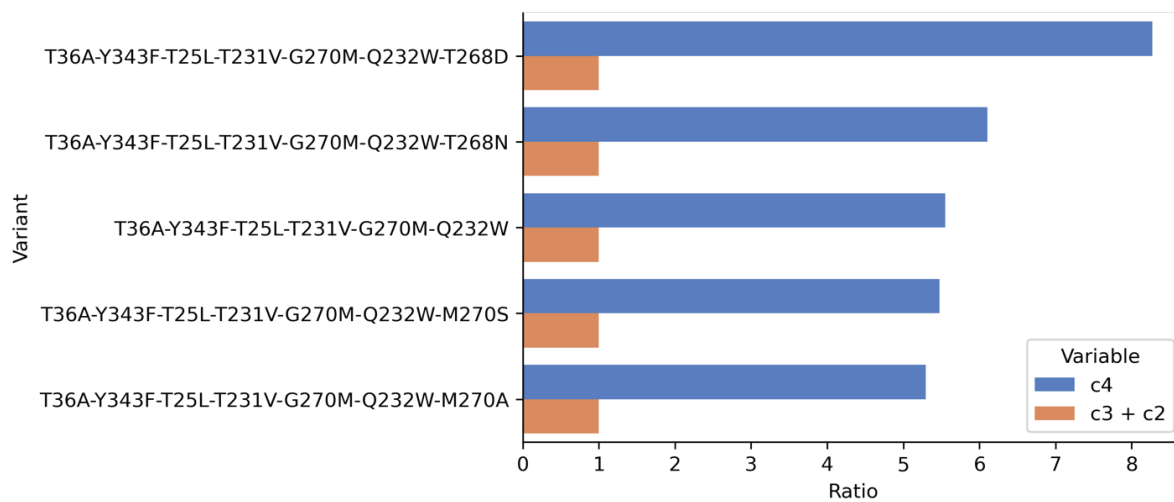

Supplemental Figure 11: Round 4 Hit Ratios Summary

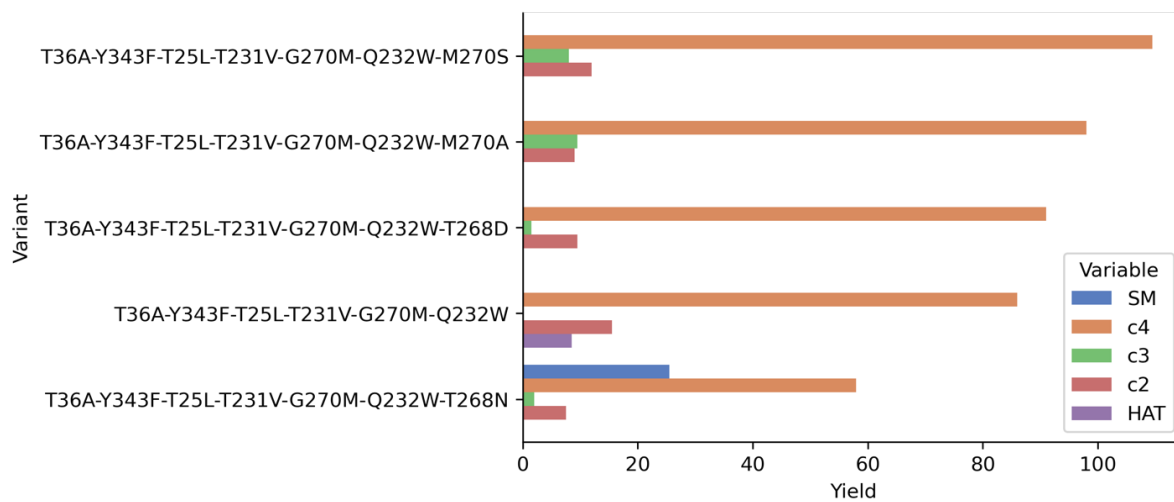

Supplemental Figure 12: Round 4 Hit Yields Summary

Site Saturation Mutagenesis for Quinoline Alkylation **Round 1**

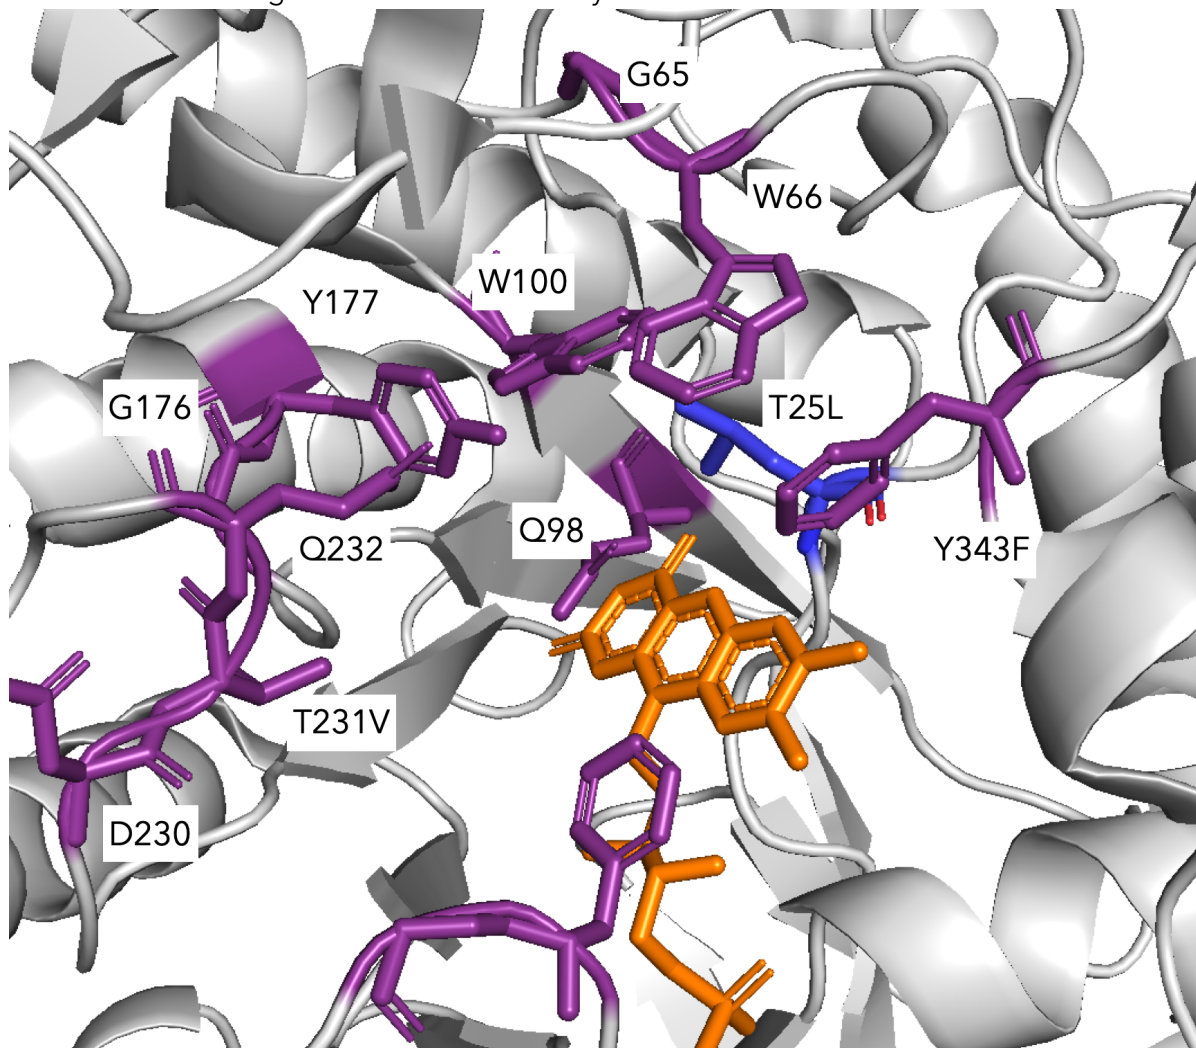

| Template                    | Sites Targeted                                                            | Hits Identified |
|-----------------------------|---------------------------------------------------------------------------|-----------------|
| GluER T36A Y343F T25L T231V | W66, G176, G270, Q232, T231, D230, F343, F269, I179, Y177, G65, Q98, W100 | F343W           |



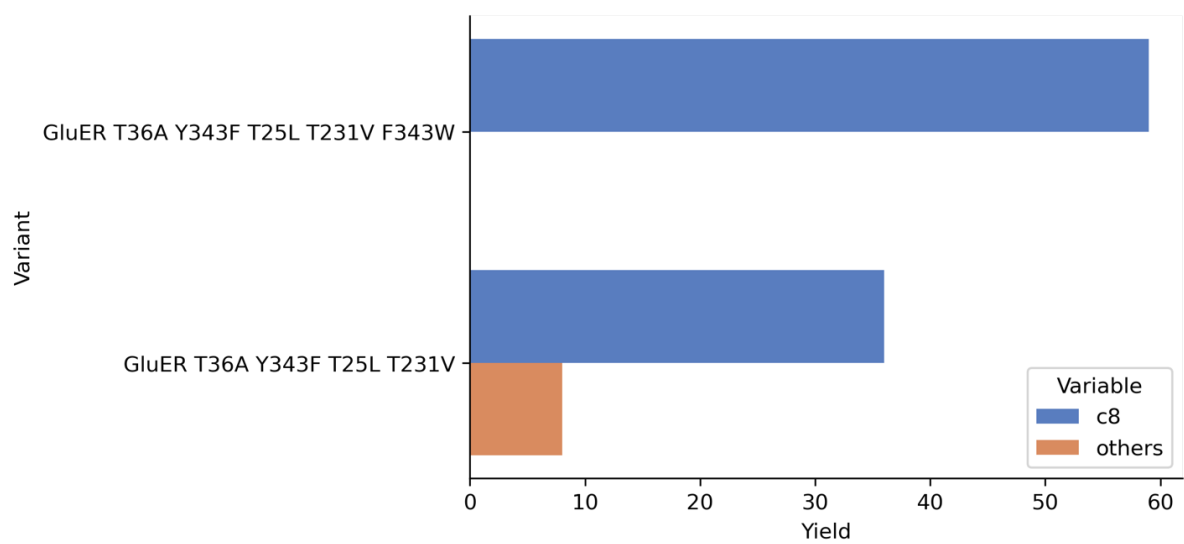

Supplemental Figure 13: Quinoline Hit Yield Summary

**Part V. Reaction Condition Optimization:****Supplemental Table 2: NADP<sup>+</sup> loading with GluER T36A Y343F**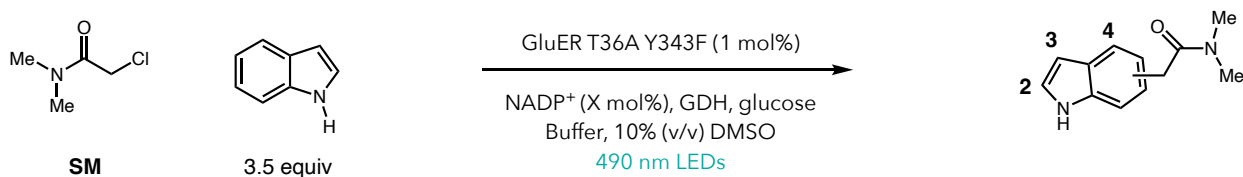

| NADP <sup>+</sup> mol% | SM yield (%) | C2 % yield | C3 % yield | C4 % yield |
|------------------------|--------------|------------|------------|------------|
| 1%                     | n.d.         | 42%        | 15%        | 37%        |
| 2%                     | n.d.         | 34%        | 18%        | 33%        |
| 3%                     | n.d.         | 25%        | 15%        | 30%        |
| 4%                     | n.d.         | 25%        | 16%        | 32%        |
| 5%                     | n.d.         | 24%        | 16%        | 33%        |
| 10%                    | 55%          | 7%         | 10%        | 18%        |

Reaction conditions:  $\alpha$ -chloroamide ( 2 mg, 20  $\mu$ mol), 3.5 equiv. of arene ( 70  $\mu$ mol), 1 mol% GluER T36A Y343F, X mol% NADP<sup>+</sup>, 1 mg GDH and 6 equiv of glucose (120  $\mu$ mol) was irradiated with Cyan LEDS for 24 hours. Yield of each regioisomer was determined by NMR using 1,3,5-trimethoxybenzene as standard.

**Supplemental Table 3: Buffer Screen across EREDs**

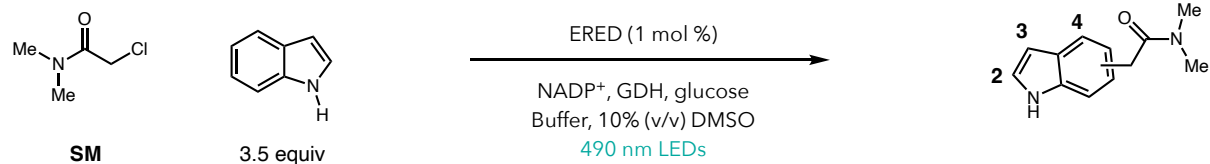

| ERED       | Buffer                        | SM yield (%) | C2 % yield | C3 % yield | C4 % yield |
|------------|-------------------------------|--------------|------------|------------|------------|
| GluER T36A | 100 mM Tris, pH 9             | n.d.         | 24%        | 18%        | 32%        |
| GluER T36A | 100 mM KP <sub>i</sub> , pH 8 | 30%          | 14%        | 9%         | 14%        |
| GluER-R5   | 100 mM Tris, pH 9             | n.d.         | 12%        | n.d.       | 62%        |
| GluER-R5   | 100 mM KP <sub>i</sub> , pH 8 | n.d.         | 12%        | n.d.       | 69%        |
| AspER      | 100 mM Tris, pH 9             | 48%          | 48%        | n.d.       | n.d.       |
| AspER      | 100 mM KP <sub>i</sub> , pH 8 | 79%          | 7%         | n.d.       | n.d.       |

Reaction conditions:  $\alpha$ -chloroamide ( 2 mg, 20  $\mu$ mol), 3.5 equiv. of arene ( 70  $\mu$ mol), 1 mol% ERED, 1 mol% NADP<sup>+</sup>, 1 mg GDH and 6 equiv of glucose (120  $\mu$ mol) was irradiated with Cyan LEDs for 24 hours. Yield of each regioisomer was determined by NMR using 1,3,5-trimethoxybenzene as standard.

**Supplemental Table 4: Glucose loading screen**

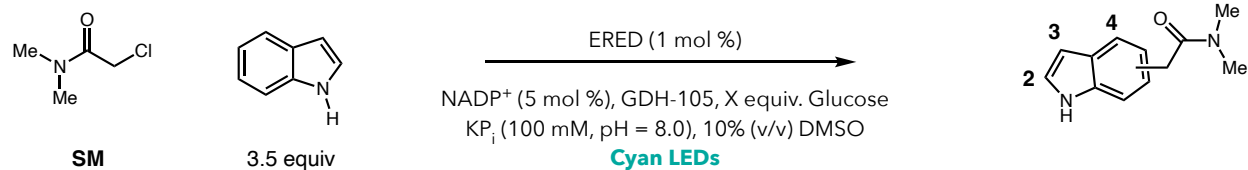

| ERED      | Eq. Glucose      | SM % yield | C2 % yield | C3 % yield | C4 % yield |
|-----------|------------------|------------|------------|------------|------------|
| PagER     | 6                | n.d.       | 9%         | n.d.       | 91%        |
| PagER     | 0.5              | n.d.       | 9%         | n.d.       | 91%        |
| GluERT36A | 6                | <5%        | 32%        | 20%        | 25%        |
| GluERT36A | 0.5 <sup>a</sup> | <5%        | 26%        | 13%        | 22%        |

Reaction conditions:  $\alpha$ -chloroamide ( 2 mg, 20  $\mu$ mol), 3.5 equiv. of arene ( 70  $\mu$ mol), 1 mol% ERED, 5 mol% NADP<sup>+</sup>, 1 mg GDH and 6 or 0.5 equiv of glucose (120  $\mu$ mol) was irradiated with Cyan LEDs for 24 hours. Yield of each regioisomer was determined by NMR using 1,3,5-trimethoxybenzene as standard. Reactions with GluER T36A used 1 mol% NADP<sup>+</sup>

**Supplemental Table 5: Control Reactions with GluER T36A**

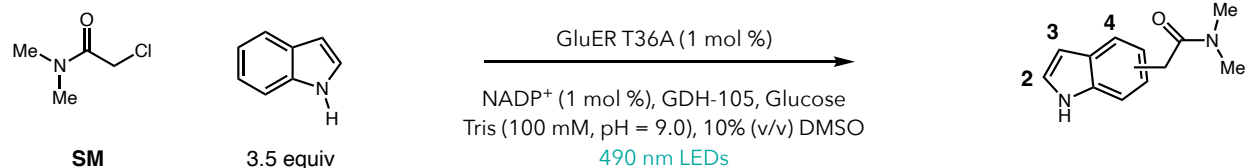

| Condition            | SM yield (%) | C2 % yield | C3 % yield | C4 % yield |
|----------------------|--------------|------------|------------|------------|
| standard             | n.d.         | 24%        | 18%        | 32%        |
| 1 mol% FMN           | 98%          | n.d.       | n.d.       | n.d.       |
| no NADP <sup>+</sup> | 65%          | 20%        | 4%         | 8%         |
| no GDH               | 66%          | 16%        | 2%         | 5%         |
| no glucose           | 72%          | 18%        | 4%         | 7%         |
| no light             | >99%         | n.d.       | n.d.       | n.d.       |

Reaction conditions:  $\alpha$ -chloroamide ( 2 mg, 20  $\mu$ mol), 3.5 equiv. of arene ( 70  $\mu$ mol), 1 mol% ERED, 1 mol% NADP<sup>+</sup>, 1 mg GDH and 6 equiv of glucose (120  $\mu$ mol) was irradiated with Cyan LEDS for 24 hours. Yield of each regioisomer was determined by NMR using 1,3,5-trimethoxybenzene as standard.

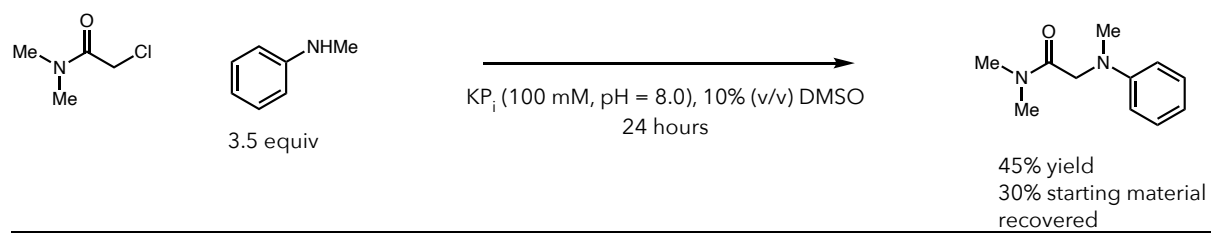

Supplemental Figure 14: Background N-alkylation of N-methylaniline

## Part VI. Starting Materials Synthesis and Characterization:

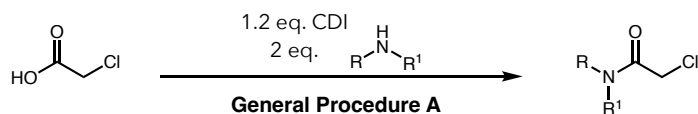

### General Procedure A

Starting materials were synthesized using a procedure in Page et. al.,<sup>49</sup> To a flame dried flask and stir bar, dry DCM was added. 1.2 eq of CDI and the starting acid were added and the reaction was stirred for 1 hour. The amine was added and the reaction was allowed to stir overnight. The reaction mixture was poured into a separatory funnel containing saturated sodium bicarbonate and more DCM. The DCM layer was separated and then washed with 10% HCl. The organic layer was then washed with brine, dried over sodium sulfate and concentrated *in vacuo* to afford the pure chloroamide.

#### 2-chloro-N-methoxy-N-methylacetamide (4)

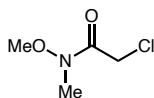

Synthesized using general procedure A. All spectra match reported values.<sup>49</sup>

#### 2-chloro-2,2-difluoro-N,N-dimethylacetamide (5)

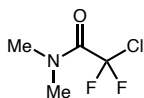

Synthesized using general procedure A. All spectra match reported values.<sup>49</sup>

1-(azetidin-1-yl)-2-chloroethan-1-one (6)

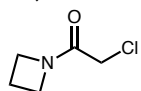

Synthesized using General Procedure A to produce a clear oil. All spectra match reported values.<sup>50</sup>



## Part VII. General Procedure for the Biocatalytic Alkylation of Arenes:

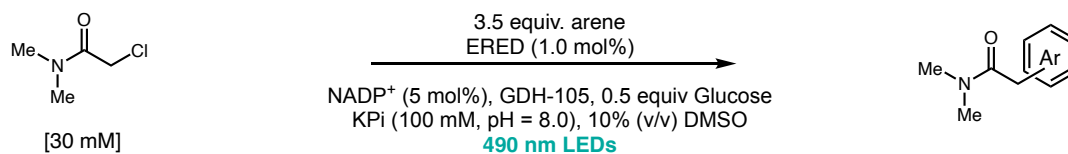

### General Procedure for NMR Yield:

All reactions were set up in a Coy® Chamber. Reactions were run with 20  $\mu\text{mol}$  of chloroamide starting material at a final substrate concentration of 30 mM in duplicate. A shell vial with a magnetic cross stir bar was charged with a "master mix" solution of 0.5 equivalents of (D)-glucose and 1 mg of GDH/ 20  $\mu\text{mol}$  of substrate dissolved in 100 mM Tris pH 9 or 100 mM KPi pH 8 in a volume such that the final concentration of substrate would be 30 mM after addition of all the other reagents.  $d_6$ -DMSO (deuterated DMSO allowed for simplified NMR analysis) was added to the shell vial such that it would be 10% (v/v). Then 140  $\mu\text{L}$  of a 5 mg/mL solution of NADP<sup>+</sup> was added. Finally, 1 mol% of ERED was added. Neat chloroamide was then added to the shell vial, followed by arene. Then the arene was added. Both reagents were added neat if the density was known. If the density of either of the substrates was not known, they were added as stock solutions in  $d_6$ -DMSO. The vial was sealed with a rubber septa and brought out of the Coy® Chamber where it is placed on a stir plate at 300 rpm under a fan and irradiated with cyan LEDs (50 W Chanzon high power LED chip,  $\lambda_{\text{max}} = 490 \text{ nm}$ , measured photon flux = 12,000  $\text{mM}/\text{m}^2 \text{ s}$ ) for 24 hours.

After 24 hours, 6.667  $\mu\text{mol}$  of internal standard (1,3,5-trimethoxybenzene) was added from a stock solution in ethyl acetate.

**Workup 1:** Then an equal volume of ethyl acetate was added and the reactions were stirred for 30 minutes. They were centrifuged at 2000  $\times g$  for 2 minutes and organic layer was removed. The extraction process was repeated 6 times. The organic layers were pooled and concentrated *in vacuo* and then resuspended in  $\text{CDCl}_3$  and concentrated *in vacuo* again. The dried crude mixture was resuspended in  $\text{CDCl}_3$  and analyzed by  $^1\text{H}$ -NMR for yield calculation, where the singlet at  $\delta = 6.06 \text{ ppm}$  corresponding to the three aromatic protons of 1,3,5-trimethoxybenzene was set to an integration of 1.00. Integration of varying signals of different product could be used to calculate an effective yield. The regioisomeric ratio was determined relative to the trimethoxybenzene standard.

**Workup 2:** 1 mL of ACN was added to crash out protein and the water was removed using a Genovac EZ-Plus 2 on the aqueous setting at 45°. The dried crude mixture was resuspended in  $\text{CDCl}_3$  and analyzed by  $^1\text{H}$ -NMR for yield calculation, where the singlet at  $\delta = 6.06 \text{ ppm}$  corresponding to the three aromatic protons of 1,3,5-trimethoxybenzene was set to an integration of 1.00. Integration of varying signals of different product could be used to

calculate an effective yield. The regioisomeric ratio was determined relative to the trimethoxybenzene standard.

Photo: NMR yield scale reaction set up

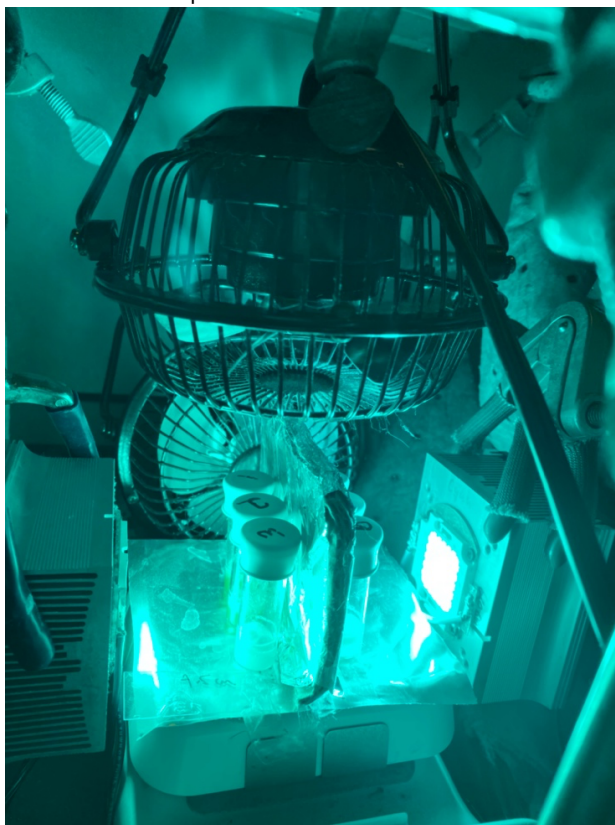

#### General Procedure for isolated yield:

All reactions were set up in an anaerobic Coy® Chamber. They were run with 200  $\mu\text{mol}$  of chloroamide starting material at a final substrate concentration of 30 mM. A 25 mL pear-shaped flask with a stir bar was charged with 0.5 equivalents of (D)-glucose, 20 mg of GDH and 5 mol% of NADP<sup>+</sup>. The solids were brought into the Coy Chamber and dissolved in 100 mM KPi pH 8 in a volume such that the final concentration of substrate would be 30 mM after addition of all the other reagents. DMSO was added to the flask such that it would be 10% (v/v) of the final volume. Finally, 1 mol% of ERED was added. If the arene or alkyl halide was a solid, it was weighed and put in the flask beforehand. Both reagents were added neat under anaerobic conditions if it was a liquid and the density was known. The vial was sealed with a rubber septa and brought out of the Coy® Chamber where it is placed on a stir plate at 600

rpm under a fan and immediately irradiated with cyan LEDs (50 W Chanzon high power LED chip,  $\lambda_{\text{max}} = 490 \text{ nm}$ , measured photon flux =  $12,000 \text{ mM/m}^2 \text{ s}$ ) for 24 hours.

Workup was performed as follows: 66.7  $\mu\text{mol}$  of trimethoxybenzene was added to the contents of the reaction flask and they were poured into a 125 mL Erlenmeyer flask containing 50 mL of water and 50 mL of ethyl acetate. This was stirred vigorously for 45 minutes, after which time the biphasic mixture was filtered through a thick pad of Celite® to remove precipitated protein. This pad was washed with ethyl acetate (2 x 25 mL). The filtrate was poured into a separatory funnel and the dichloromethane layer was collected. The aqueous layer was extracted with dichloromethane (4 x 50 mL) (without any emulsion-related difficulties), and the combined organic layers were dried with anhydrous sodium sulfate and concentrated. A crude NMR yield was taken before purification. The crude residue was purified using silica gel chromatography (20% - 80% EtOAc in toluene). Fractions containing product were combined and concentrated to yield the pure coupled product. If further purification was necessary, a reverse phase column was run. To separate out the regioisomers for purification, semi-preparative HPLC was used.

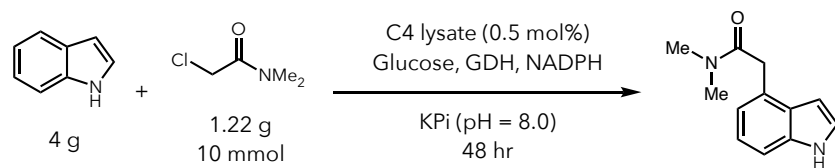

Photo: Gram scale reaction set up and isolated product

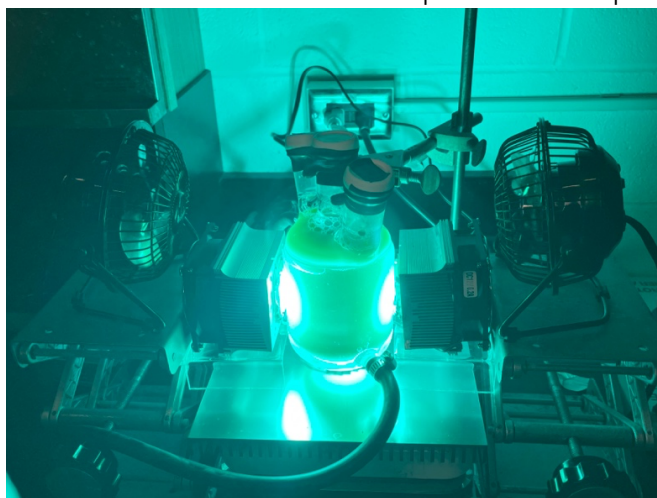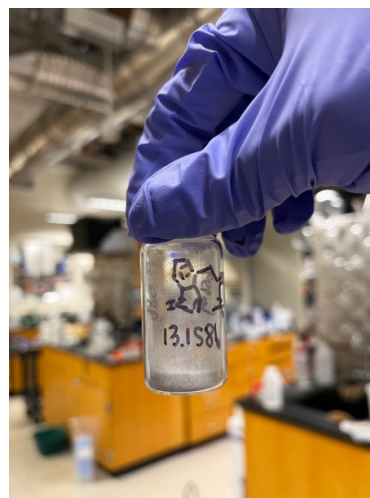

Lysate standard curve and enzyme concentration for the gram scale reaction:

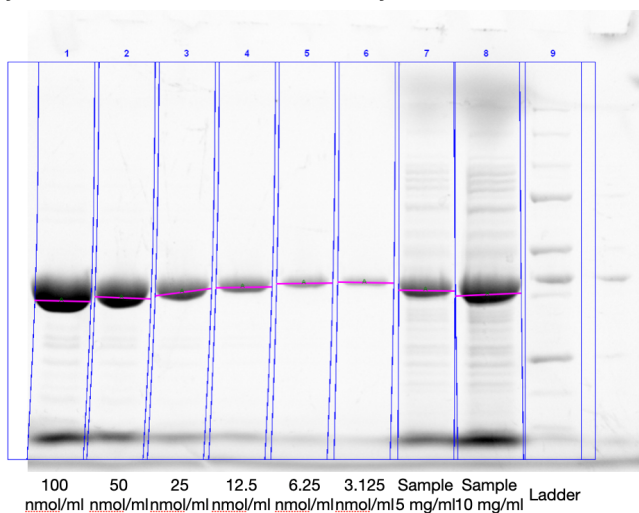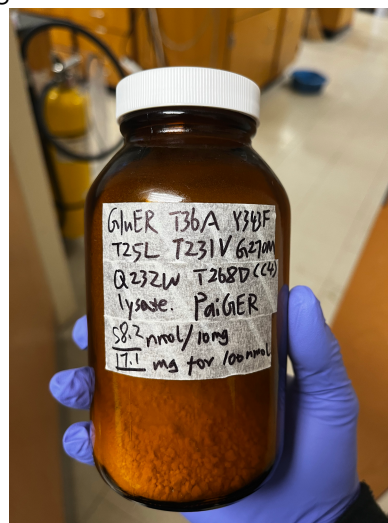

Paiger Lysate Standard Curve:

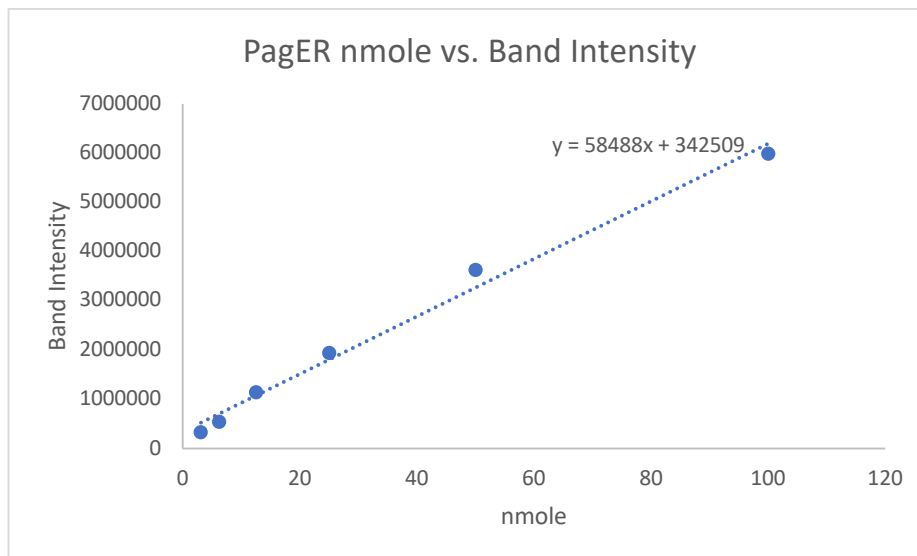

General Procedure for gram scale reaction:

Gram scale reaction was set up in an anaerobic three neck jacketed flask. They were run with 10 mmol of chloroamide starting material at a final substrate concentration of 30 mM. A 250 mL three neck jacket flask with a stir bar was charged with 8.55 g of PagER lysate (0.5 mol% at 17.1 mg/100 nmol), 4 g of indole (3.5 equiv), 1.8 g of (D)-glucose (1.1 equiv), 500 mg of GDH and 350 mg of NADP<sup>+</sup> (0.5 equiv). The solids were sealed with rubber septa, vacuumed and refilled with nitrogen gas three times. Then they were dissolved in 100 mM degassed KP<sub>i</sub> pH 8 in a volume such that the final concentration of substrate would be 30 mM through cannula transferring. Upon completion, chloroamide was added via syringe neat. DMSO was added to the flask slowly such that it would be 10% (v/v) of the final volume. The jacketed flask was connected with water cooling line (tap water, rt) and brought on a stir plate at 400 rpm under a fan and immediately irradiated with cyan LEDs (2 x 100 W Chanzon high power LED chip from the side and 1 x 50 W Chanzon high power LED chip,  $\lambda_{\text{max}}$  = 490 nm, measured photon flux = 12,000 mW/m<sup>2</sup> s) for 48 hours.

Workup was performed as follows: the reaction media was poured into a 2L Erlenmeyer flask containing 600 mL of MeCN. Enzymes were immediately crashed out and this was stirred vigorously for 20 minutes, after which time the heterogenous mixture was filtered through a thick pad of Celite<sup>®</sup> to remove precipitated protein. This pad was washed with MeCN (3 x 100 mL). The filtrate was poured into a round bottom flask and most of the MeCN was removed in vacuo. Then the remaining aqueous mixture was transferred into a separatory funnel and the dichloromethane layer was collected. The aqueous layer was extracted with dichloromethane (4 x 300 mL) (without any emulsion-related difficulties), and the combined organic layers were dried with anhydrous sodium sulfate and concentrated. Excess DMSO was distilled off under vacuum and then the crude residue was purified using silica gel chromatography (50% - 100%

EtOAc in toluene). Fractions containing product were combined and concentrated to yield the pure isolated product 2-(1H-indol-4-yl)-N,N-dimethylacetamide (1.05 g, 52% isolated yield)

### **Part VIII. Product Characterization:**

2-(1H-indol-4-yl)-N,N-dimethylacetamide (**3a**)

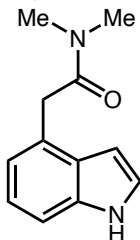

The product standard was isolated using the isolated scale biocatalytic procedure using PagER (75% isolated yield, 9:1 C4: others). It was further purified by semi-preparative HPLC (40-95% MeCN over 18 minutes) to give the pure product as a white solid. Spectra match reported values.<sup>51</sup>

NMR yield:

Trial 1: 91% yield C4, 10% yield C2, <5% yield C3 (9:1 C4: others)

Trial 2: 88% yield, 9% yield C2, < 5% yield C3 (9:1 C4: others)

<sup>1</sup>H NMR (500 MHz, CDCl<sub>3</sub>):  $\delta$  8.39 (s, 1H), 7.30 (d,  $J$  = 8.1 Hz, 1H), 7.20 (t,  $J$  = 2.9 Hz, 1H), 7.14 (t,  $J$  = 7.7 Hz, 1H), 6.98 (d,  $J$  = 7.2 Hz, 1H), 6.65 (dd,  $J$  = 2.2, 1.1 Hz, 1H), 4.01 (s, 2H), 2.97 (d,  $J$  = 11.5 Hz, 6H).

<sup>13</sup>C NMR (126 MHz, CDCl<sub>3</sub>):  $\delta$  171.5, 136.0, 127.4, 127.2, 124.3, 122.3, 119.6, 110.0, 101.0, 39.5, 38.0, 35.8.

IR (cm<sup>-1</sup>): 3257, 2923, 1630, 1501, 1397, 1342, 755

HRMS: calc'd [M+H]<sup>+</sup>: 203.117886, found 203.11751

2-(1H-indol-2-yl)-N,N-dimethylacetamide (**3b**)

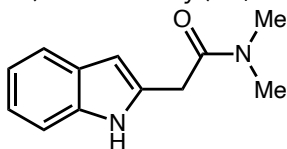

The product standard was synthesized using the following procedure. The assay yields were determined using the NMR scale biocatalytic procedure with 1.0 mol% AspER except no NADP<sup>+</sup>, GDH-105 or glucose was added and the reaction was run in 100 mM Tricine pH 9.

Synthetic Roadmap:

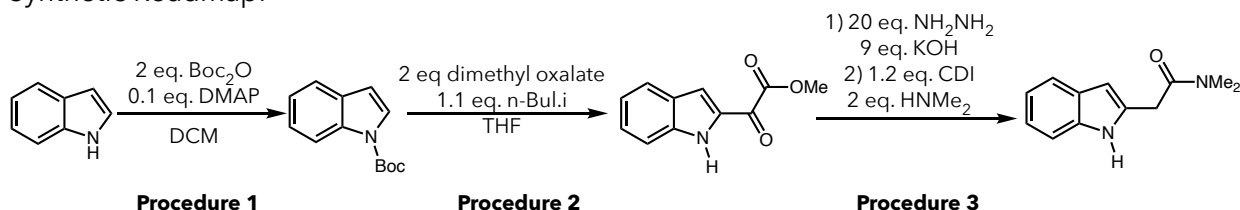

**Procedure 1:** Indole (1 equiv) and DMAP (0.1 equiv) were added to a round bottom flask and dissolved in DCM. Boc<sub>2</sub>O (2 equiv) was added in portions and the solution was left to stir overnight. The reaction mixture was washed with brine, dried over sodium sulfate and concentrated *in vacuo*. The crude product was purified using silica gel chromatography (99% yield).

**Procedure 2:** Using a modified procedure from Hlasta et, al<sup>52</sup>, 1-Boc indole was added to a flamed dried flask charged with a magnetic stir bar. The flask was placed under inert atmosphere. Dry THF was then added and the flask was cooled to -78°C. 1.1 equiv of *t*-butyllithium was then added dropwise and the solution was allowed to stir at -78°C for 30 minutes. Dimethyl oxalate (2 equiv) was placed in a flame dried vial and dissolved in dry THF and then added to the reaction flask dropwise. The reaction mixture was left to warm up to room temperature overnight. The reaction was quenched with water and transferred to a separatory funnel. The aqueous layer was extracted three times with ethyl acetate and then dried over sodium sulfate. The organic layer was then concentrated and purified using silica gel chromatography. During the purification process, the indole was deprotected to yield pure methyl 2-(1H-indol-2-yl)-2-oxoacetate (45% yield).

**Procedure 3:** The procedure used was modified from Bennasar et. al.<sup>53</sup> methyl 2-(1H-indol-2-yl)-2-oxoacetate, hydrazine hydrate (20 equiv, 80% solution in water) and potassium hydroxide (9 equiv) were added to a flask with a stir bar and dissolved in ethanol. The solution was refluxed under an inert atmosphere for 5 hours. The ethanol and hydrazine was distilled off carefully and the residue was then heated 180°C for 30 minutes. The crude residue was dissolved in water and acid was added. The aqueous layer was extracted with ethyl acetate 3 times. The organic layers were collected and dried over sodium sulfate and then concentrated



*in vacuo*. The crude acid was then used directly in General Procedure A to produce the product standard as a pink solid in 83% yield over two steps.

NMR yield:

Trial 1: 52% yield

Trial 2: 48% yield

$^1\text{H}$  NMR (500 MHz,  $\text{CDCl}_3$ ):  $\delta$  9.09 (s, 1H), 7.54 (d,  $J$  = 7.8 Hz, 1H), 7.33 (d,  $J$  = 8.1 Hz, 1H), 7.14 (ddd,  $J$  = 8.1, 7.0, 1.2 Hz, 1H), 7.10 – 7.02 (m, 1H), 6.30 (s, 1H), 3.89 (s, 2H), 3.11 (s, 3H), 2.98 (s, 3H).

$^{13}\text{C}$  NMR (126 MHz,  $\text{CDCl}_3$ ):  $\delta$  170.0, 136.3, 131.8, 128.2, 121.5, 119.9, 119.7, 110.9, 100.9, 37.9, 35.7, 33.0.

IR ( $\text{cm}^{-1}$ ): 3260, 2923, 2852, 1633, 1494, 1455, 1339, 1229, 743

HRMS: calc'd  $[\text{M}+\text{H}]^+$ : 203.117886, found 203.11751

2-(1H-indol-3-yl)-N,N-dimethylacetamide (**3c**)

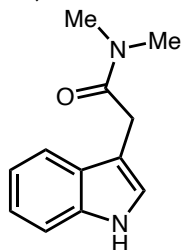

The product standard was synthesized using General Procedure A from commercially available starting materials. All spectra match reported values.<sup>54</sup>

<sup>1</sup>H NMR (500 MHz, CDCl<sub>3</sub>): δ 8.19 (s, 1H), 7.65 (d, J = 7.9 Hz, 1H), 7.36 (dd, J = 8.1, 1.0 Hz, 1H), 7.22 – 7.17 (m, 1H), 7.17 – 7.08 (m, 2H), 3.83 (d, J = 1.1 Hz, 2H), 3.03 (s, 3H), 2.98 (s, 3H).

<sup>13</sup>C NMR (126 MHz, CDCl<sub>3</sub>): δ 171.7, 136.3, 127.4, 122.6, 122.3, 119.8, 119.0, 111.3, 109.5, 38.0, 35.8, 31.4.

IR (cm<sup>-1</sup>): 3245, 2926, 1628, 1457, 1261, 742

HRMS: calc'd [M+H]<sup>+</sup>: 203.117886, found 203.11751

2-(1H-indol-4-yl)-N-methoxy-N-methylacetamide (**12a**)

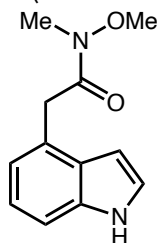

The product standard was isolated using the isolated scale biocatalytic procedure using PagER (67% isolated yield, 3.7:1 C4: others). It was further purified by semi-preparative HPLC (40-95% MeCN over 18 minutes) to give the pure product as a white solid.

NMR yield:

Trial 1: 50% yield C4 11% yield C2 ~<5% yield C3

Trial 2: 54% yield C4 11% yield C2 ~<5% yield C3

$^1\text{H}$  NMR (500 MHz,  $\text{CDCl}_3$ ):  $\delta$  8.36 (s, 1H), 7.27 (d,  $J$  = 8.5 Hz, 1H), 7.22 – 7.08 (m, 2H), 7.04 (d,  $J$  = 7.1 Hz, 1H), 6.65 (dt,  $J$  = 4.4, 1.6 Hz, 1H), 4.07 (s, 2H), 3.54 (s, 3H), 3.20 (s, 3H).

$^{13}\text{C}$  NMR (126 MHz,  $\text{CDCl}_3$ ):  $\delta$  172.8, 135.9, 127.8, 127.1, 124.2, 122.1, 122.1, 120.5, 110.1, 101.1, 61.4, 37.6, 32.4.

IR ( $\text{cm}^{-1}$ ): 3286, 3052, 2935, 1636, 1416, 1340, 1174, 751

HRMS: calc'd  $[\text{M}+\text{H}]^+$ : 219.112806, found 219.11247

2-(1H-indol-2-yl)-N-methoxy-N-methylacetamide (**12b**)

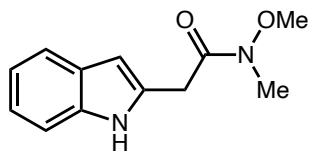

The product standard was isolated using the isolated scale biocatalytic procedure using PagER (67% isolated yield, 3.7:1 C4:C2+C3). It was further purified by semi-preparative HPLC (40-95% MeCN over 18 minutes) to give the pure product as a white solid.

$^1\text{H}$  NMR (500 MHz,  $\text{CDCl}_3$ ):  $\delta$  9.00 (s, 1H), 7.54 (dd,  $J$  = 7.8, 1.1 Hz, 1H), 7.34 (dd,  $J$  = 8.0, 1.0 Hz, 1H), 7.14 (ddd,  $J$  = 8.1, 7.0, 1.2 Hz, 1H), 7.07 (td,  $J$  = 7.5, 1.1 Hz, 1H), 6.35 (dd,  $J$  = 2.1, 1.1 Hz, 1H), 3.99 (s, 2H), 3.73 (s, 3H), 3.24 (s, 3H).

$^{13}\text{C}$  NMR (126 MHz,  $\text{CDCl}_3$ ):  $\delta$  171.1, 136.4, 131.9, 128.3, 121.7, 120.1, 119.8, 111.0, 101.6, 61.8, 32.3, 31.3.

IR ( $\text{cm}^{-1}$ ): 3302, 3053, 2934, 1645, 1456, 1421, 1386, 1297, 748

HRMS: calc'd  $[\text{M}+\text{H}]^+$ : 219.112806, found 219.11247

2-(1H-indol-3-yl)-N-methoxy-N-methylacetamide (**12c**)

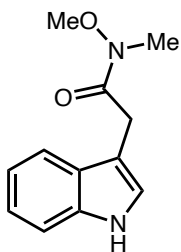

The product standard was synthesized using General Procedure A from commercially available starting materials. The pure product is a off-white solid.

IR (cm<sup>-1</sup>): 3285, 2933, 1636, 1458, 1421, 1174, 1096, 1000, 741

HRMS: calc'd [M+H]<sup>+</sup>: 219.112806, found 219.11247

2,2-difluoro-2-(1H-indol-4-yl)-N,N-dimethylacetamide (**13**)

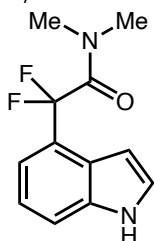

The product standard was isolated using the isolated scale biocatalytic procedure using 1.5 mol% of PagER (45% isolated yield).

NMR yield:

Trial 1: 48% yield

Trial 2: 54% yield

$^1\text{H}$  NMR (500 MHz,  $\text{CDCl}_3$ ):  $\delta$  8.79 (s, 1H), 7.51 (d,  $J$  = 8.1 Hz, 1H), 7.30 (d,  $J$  = 7.4 Hz, 1H), 7.20 (t,  $J$  = 7.8 Hz, 1H), 6.79 (s, 1H), 3.05 (s, 3H), 2.90 (s, 3H).

$^{13}\text{C}$  NMR (126 MHz,  $\text{CDCl}_3$ ):  $\delta$  164.2, 136.7, 125.9, 124.8, 124.4, 121.3, 117.3, 114.2, 114.2, 114.2, 101.9, 101.8, 101.8, 37.6, 37.1.

$^{19}\text{F}$  NMR (282 MHz,  $\text{CDCl}_3$ ):  $\delta$  -93.9 (s).

IR ( $\text{cm}^{-1}$ ): 3280, 1656, 1403, 1342, 1221, 1169, 1078, 898, 757

HRMS: calc'd  $[\text{M}+\text{H}]^+$ : 239.099046, found 239.09839

1-(azetidin-1-yl)-2-(1H-indol-4-yl)ethan-1-one (**14a**)

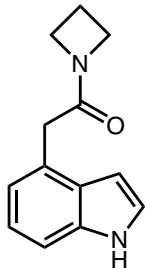

The product standard was isolated using the isolated scale biocatalytic procedure using 1 mol% of PagER (43% isolated yield 5:1 C4:C2). It was purified using semi-prep HPLC (30 to 75% ACN in H<sub>2</sub>O over 23 minutes) for NMR analysis to give the C4 adduct as a white solid.

NMR yield:

Trial 1: 32% yield C4, 6% yield C2 (5:1 C4:C2)

Trial 2: 32% yield C4, 7% yield C2 (5:1 C4: C2)

<sup>1</sup>H NMR (500 MHz, CDCl<sub>3</sub>): δ 8.50 (s, 1H), 7.29 (d, J = 8.1 Hz, 1H), 7.18 (t, J = 2.9 Hz, 1H), 7.13 (t, J = 7.6 Hz, 1H), 7.01 (d, J = 7.2 Hz, 1H), 6.65 (t, J = 2.5 Hz, 1H), 4.01 (dt, J = 10.8, 7.7 Hz, 4H), 3.77 (s, 2H), 2.15 (p, J = 7.7 Hz, 2H).

<sup>13</sup>C NMR (126 MHz, CDCl<sub>3</sub>): δ 171.2, 136.0, 127.7, 126.7, 124.3, 122.1, 120.2, 110.1, 101.1, 50.9, 48.3, 37.9, 15.3.

IR (cm<sup>-1</sup>): 3265, 2922, 2853, 1626, 1464, 1441, 722

HRMS: calc'd [M+H]<sup>+</sup>: 215.117886, found 215.11757

1-(azetidin-1-yl)-2-(1H-indol-2-yl)ethan-1-one (**14b**)

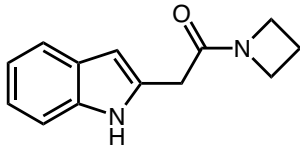

The product standard was synthesized using the isolated scale biocatalytic procedure.

$^1\text{H}$  NMR (500 MHz,  $\text{CDCl}_3$ ):  $\delta$  9.10 (s, 1H), 7.53 (d,  $J$  = 7.8 Hz, 1H), 7.34 (d,  $J$  = 8.1 Hz, 1H), 7.19 – 7.02 (m, 2H), 6.30 – 6.24 (m, 1H), 4.25 (t,  $J$  = 7.7 Hz, 2H), 4.05 (t,  $J$  = 7.8 Hz, 2H), 3.60 (s, 2H), 2.27 (p,  $J$  = 7.7 Hz, 2H).

$^{13}\text{C}$  NMR (126 MHz,  $\text{CDCl}_3$ ):  $\delta$  169.6, 136.4, 131.6, 128.3, 121.7, 120.0, 119.8, 111.1, 101.0, 50.7, 48.3, 30.9, 15.1.

IR ( $\text{cm}^{-1}$ ): 3257, 3051, 2950, 2879, 1633, 1455, 1430, 1297, 800

HRMS: calc'd  $[\text{M}+\text{H}]^+$ : 215.117886, found 215.11757



N,N-dimethyl-2-(1-methyl-1H-indol-4-yl)acetamide (**15a**)

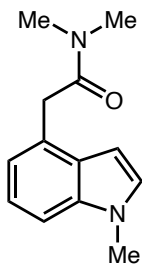

The product standard was isolated using the isolated scale biocatalytic procedure using 1.0 mol% of GluER-T36A-Y343F-T25L-T231V-G270M-Q232W (40% isolated yield).

NMR yield:

Trial 1: 38% yield C4, 8% yield C2 (5:1 C4:others)

Trial 2: 36% yield C4, 7% yield C2 (5:1 C4:others)

NMR:  $^1\text{H}$  NMR (500 MHz,  $\text{CDCl}_3$ ):  $\delta$  7.24 (d,  $J$  = 8.2 Hz, 1H), 7.17 (d,  $J$  = 8.1 Hz, 1H), 7.06 (s, 1H), 6.98 (d,  $J$  = 7.1 Hz, 1H), 6.59 (d,  $J$  = 3.1 Hz, 1H), 3.99 (s, 2H), 3.79 (s, 3H), 2.96 (d,  $J$  = 16.1 Hz, 6H).

$^{13}\text{C}$  NMR (126 MHz,  $\text{CDCl}_3$ ):  $\delta$  171.5, 136.9, 128.9, 128.0, 127.3, 121.9, 119.1, 108.1, 99.4, 39.5, 38.0, 35.8, 33.1.

IR ( $\text{cm}^{-1}$ ): 2931, 1638, 1496, 1394, 1239, 1132, 745

HRMS: calc'd  $[\text{M}+\text{H}]^+$ : 217.133536, found 217.13312

N,N-dimethyl-2-(1-methyl-1H-indol-2-yl)acetamide (**15b**)

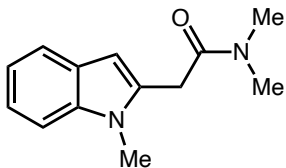

The product standard was isolated using the isolated scale biocatalytic procedure using 1.0 mol% of GluER-T36A-Y343F-T25L-T231V-G270M-Q232W (40% isolated yield). The spectra match the values from synthesis of the authentic standard using Procedure 2 and 3 from the synthesis of N,N-dimethyl-2-(1H-indol-2-yl)acetamide (17% overall yield).

$^1\text{H}$  NMR (500 MHz,  $\text{CDCl}_3$ ):  $\delta$  7.54 (d,  $J$  = 7.9 Hz, 1H), 7.29 (d,  $J$  = 8.2 Hz, 1H), 7.19 (dd,  $J$  = 8.3, 7.0 Hz, 1H), 7.11 – 7.04 (m, 1H), 6.32 (s, 1H), 3.89 (s, 2H), 3.76 (s, 3H), 3.16 – 2.92 (m, 6H).

$^{13}\text{C}$  NMR (126 MHz,  $\text{CDCl}_3$ ):  $\delta$  169.3, 137.9, 133.8, 127.7, 121.3, 120.2, 119.6, 109.3, 101.3, 38.0, 36.0, 33.7, 30.2.

IR ( $\text{cm}^{-1}$ ): 2929, 1645, 1456, 1394, 1132, 771, 748

HRMS: calc'd  $[\text{M}+\text{H}]^+$ : 217.133536, found 217.13312

2-(6-bromo-1H-indol-7-yl)-N,N-dimethylacetamide (**16a**)

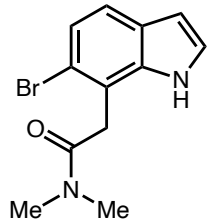

The product standard was isolated using the isolated scale biocatalytic procedure using 1.5 mol% of PagER (50% isolated yield).

NMR yield:

Trial 1: 43% yield C7, 7% yield C4 (6:1 C7:others)

Trial 2: 49% yield C7, 8% yield C4 (6:1 C7:others)

$^1\text{H}$  NMR (500 MHz,  $d_6$ -DMSO):  $\delta$  11.22 (s, 1H), 7.46 (dd,  $J$  = 1.7, 0.9 Hz, 1H), 7.34 (dd,  $J$  = 3.2, 2.4 Hz, 1H), 6.96 (d,  $J$  = 1.7 Hz, 1H), 6.51 (ddd,  $J$  = 3.1, 2.0, 0.9 Hz, 1H), 3.89 (s, 2H), 2.99 (s, 3H), 2.84 (s, 3H)

$^{13}\text{C}$  NMR (126 MHz,  $d_6$ -DMSO):  $\delta$  169.8, 136.6, 129.5, 126.7, 125.9, 121.6, 113.4, 112.3, 100.2, 37.5, 37.2, 35.0.

IR ( $\text{cm}^{-1}$ ): 3235, 2921, 2851, 1630, 1418, 1395, 1140, 858, 812

HRMS: calc'd  $[\text{M}+\text{H}]^+$ : 281.028406, found 281.02794

2-(6-bromo-1H-indol-4-yl)-N,N-dimethylacetamide (**16b**)

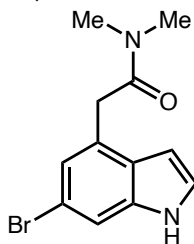

The product standard was isolated using the isolated scale biocatalytic procedure using 1.5 mol% of PagER (50% isolated yield).

NMR yield:

Trial 1: 43% yield C7, 7% yield C4 (6:1 C7:others)

Trial 2: 49% yield C7, 8% yield C4 (6:1 C7:others)

$^1\text{H}$  NMR (500 MHz,  $d_6$ -DMSO)  $\delta$  11.12 (s, 1H), 7.60 (s, 1H), 7.42 (s, 1H), 7.38 – 7.34 (m, 1H), 6.40 (s, 1H), 3.80 (s, 2H), 3.06 (s, 3H), 2.87 (s, 3H).

$^{13}\text{C}$  NMR (126 MHz,  $d_6$ -DMSO)  $\delta$  169.9, 135.6, 127.3, 126.6, 125.6, 122.1, 117.0, 114.5, 100.9, 39.8, 37.0, 35.1.

IR ( $\text{cm}^{-1}$ ): 3245, 2932, 1636, 1397, 1297, 1138, 766

HRMS: calc'd  $[\text{M}+\text{H}]^+$ : 281.028406, found 281.02794

2-(7-bromo-1H-indol-6-yl)-N,N-dimethylacetamide (**17a**)

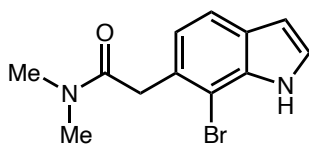

The product standard was isolated using the isolated scale biocatalytic procedure using 1 mol% of PagER (17% isolated yield).

NMR yield:

Trial 1: 23% yield C6, 17% yield C4 (1:1 C4:C6)

Trial 2: 23% yield C6, 15% yield C4 (1:1 C4: C6)

$^1\text{H}$  NMR (500 MHz,  $\text{CDCl}_3$ ):  $\delta$  8.39 (s, 1H), 7.52 (d,  $J$  = 8.0 Hz, 1H), 7.22 (t,  $J$  = 2.8 Hz, 1H), 7.05 (d,  $J$  = 8.1 Hz, 1H), 6.59 (dd,  $J$  = 3.1, 2.2 Hz, 1H), 3.95 (s, 2H), 3.01 (d,  $J$  = 7.4 Hz, 6H).

$^{13}\text{C}$  NMR (126 MHz,  $\text{CDCl}_3$ ):  $\delta$  171.0, 135.3, 128.0, 127.9, 124.9, 122.0, 120.1, 106.7, 103.9, 40.5, 37.7, 35.9.

IR ( $\text{cm}^{-1}$ ): 3255, 2922, 1636, 1508, 1397, 1137, 797, 727

HRMS: calc'd  $[\text{M}+\text{H}]^+$ : 281.028406, found 281.02791

2-(7-bromo-1H-indol-4-yl)-N,N-dimethylacetamide (**17b**)

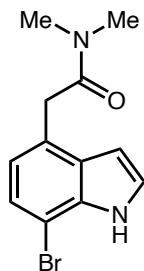

The product standard was isolated using the isolated scale biocatalytic procedure using 1 mol% of PagER (17% isolated yield 1:1 C4:C6). It was purified using semi-prep HPLC (30 to 65% ACN in H<sub>2</sub>O over 25 minutes) for NMR analysis to give the C4 adduct as a white solid.

NMR yield:

Trial 1: 23% yield C4, 17% yield C6 (1:1 C4:C6)

Trial 2: 23% yield C4, 15% yield C6 (1:1 C4: C6)

<sup>1</sup>H NMR (500 MHz, CDCl<sub>3</sub>):  $\delta$  7.29 (d, J = 7.8 Hz, 1H), 7.26 (d, J = 5.7 Hz, 1H), 6.87 (d, J = 7.8 Hz, 1H), 6.72 (dd, J = 3.3, 2.2 Hz, 1H), 3.95 (s, 2H), 2.97 (d, J = 4.9 Hz, 6H).

<sup>13</sup>C NMR (126 MHz, CDCl<sub>3</sub>):  $\delta$  171.0, 134.6, 128.6, 126.8, 124.9, 124.5, 121.0, 103.4, 102.4, 102.4, 39.0, 38.0, 35.8.

IR (cm<sup>-1</sup>): 3235, 2923, 2852, 1632, 1504, 1396, 1119, 790, 727

HRMS: calc'd [M+H]<sup>+</sup>: 281.028406, found 281.02791

2-(5-bromo-1H-indol-6-yl)-N,N-dimethylacetamide (**18a**)

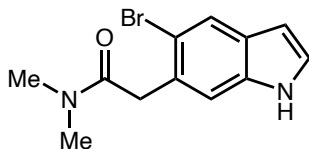

The product standard was isolated using the isolated scale biocatalytic procedure using 1.0 mol% of PagER (41% isolated yield).

NMR yield:

Trial 1: 31% yield C6, 7% yield C7, 10% C2 (2:1 C6:others)

Trial 2: 30% yield C7, 6% yield C7, 10% C2 (2:1 C6:others)

NMR:  $^1\text{H}$  NMR (500 MHz, DMSO)  $\delta$  11.23 (s, 1H), 7.33 (m, 1 H), 7.22 (s, 2H), 6.48 – 6.41 (m, 1H), 4.00 (s, 2H), 3.12 (s, 3H), 2.84 (s, 3H).

$^{13}\text{C}$  NMR (126 MHz, DMSO)  $\delta$  168.9, 134.6, 129.9, 127.3, 126.6, 124.3, 114.5, 111.6, 100.6, 37.6, 37.0, 35.1.

IR ( $\text{cm}^{-1}$ ): 3233, 2920, 1627, 1496, 1454, 1425, 1026, 820, 763

HRMS: calc'd  $[\text{M}+\text{H}]^+$ : 281.028406, found 281.02828

2-(5-bromo-1H-indol-7-yl)-N,N-dimethylacetamide (**18b**)

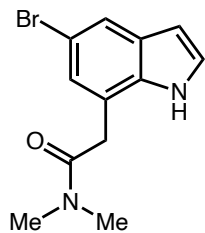

The product standard was isolated using the isolated scale biocatalytic procedure using 1.0 mol% of PagER (41% isolated yield).

$^1\text{H}$  NMR (500 MHz,  $\text{CDCl}_3$ )  $\delta$  8.73 (s, 1H), 7.79 (s, 1H), 7.34 (s, 1H), 7.12 (dd,  $J$  = 3.2, 2.5 Hz, 1H), 6.39 (ddd,  $J$  = 3.1, 2.0, 0.9 Hz, 1H), 3.93 (s, 2H), 3.04 (s, 6H)

$^{13}\text{C}$  NMR (126 MHz,  $\text{CDCl}_3$ )  $\delta$  171.7, 135.5, 128.7, 127.5, 125.8, 124.2, 115.4, 112.8, 101.6, 41.3, 37.9, 35.9

IR ( $\text{cm}^{-1}$ ): 3232, 2922, 1627, 1479, 1396, 1301, 1258, 764

HRMS: calc'd  $[\text{M}+\text{H}]^+$ : 281.028406, found 281.02828



2-(5-bromo-1H-indol-2-yl)-N,N-dimethylacetamide (**18c**)

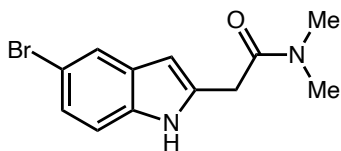

The product standard was isolated using the isolated scale biocatalytic procedure using 1.0 mol% of PagER (41% isolated yield).

$^1\text{H}$  NMR (500 MHz,  $\text{CDCl}_3$ ):  $\delta$  9.25 (s, 1H), 7.65 (dt,  $J$  = 1.7, 0.7 Hz, 1H), 7.24 – 7.16 (m, 2H), 6.23 (dd,  $J$  = 2.0, 0.9 Hz, 1H), 3.87 (s, 2H), 3.12 (s, 3H), 2.99 (s, 3H).

$^{13}\text{C}$  NMR (126 MHz,  $\text{CDCl}_3$ ):  $\delta$  169.9, 135.0, 133.4, 130.0, 124.4, 122.5, 113.0, 112.5, 100.6, 38.0, 35.9, 32.5.

IR ( $\text{cm}^{-1}$ ): 3233, 2920, 1627, 1425, 1026, 763

HRMS: calc'd  $[\text{M}+\text{H}]^+$ : 281.028406, found 281.02828

N,N-dimethyl-2-(4-(methylamino)phenyl)acetamide (**19a**)

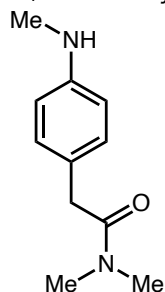

The product standard was isolated using the isolated scale biocatalytic procedure using 1 mol% of GluER T36A T25L (45% isolated yield).

NMR yield:

Trial 1: 57% yield para, 6% yield ortho (10:1 para: ortho)

Trial 2: 57% yield C4, 6% yield ortho (10:1 para : others)

$^1\text{H}$  NMR (500 MHz,  $\text{CDCl}_3$ ):  $\delta$  7.07 (d,  $J$  = 8.4 Hz, 2H), 6.57 (d,  $J$  = 8.5 Hz, 2H), 3.60 (s, 2H), 2.98 (s, 3H), 2.94 (s, 3H), 2.81 (s, 3H)

$^{13}\text{C}$  NMR (126 MHz,  $\text{CDCl}_3$ ):  $\delta$  172.0, 148.2, 129.6, 123.6, 112.8, 40.4, 37.8, 35.8, 31.0.

IR ( $\text{cm}^{-1}$ ): 3352, 2925, 1614, 1522, 1394, 1262, 1182, 817, 793

HRMS: calc'd  $[\text{M}+\text{H}]^+$ : 193.133536, found 193.133334

N,N-dimethyl-2-(2-(methylamino)phenyl)acetamide (**19b**)

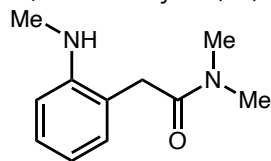

The product standard was isolated using the isolated scale biocatalytic procedure using 1 mol% of GluER T36A W66F (35% isolated yield including N-alkylation product).

NMR yield using GluER T36A W66F:

Trial 1: 12% yield ortho, 21% yield para and N-alkylation (0.6:1 ortho:others)

Trial 2: 11% yield ortho, 19% yield para and N-alkylation (0.6:1 ortho: others)

$^1\text{H}$  NMR (500 MHz,  $\text{CDCl}_3$ ):  $\delta$  7.19 (td,  $J = 7.7, 1.6$  Hz, 1H), 7.06 – 7.01 (m, 1H), 6.64 (m, 2H), 3.63 (s, 2H), 3.14 (s, 3H), 2.93 (s, 3H), 2.85 (s, 3H).

$^{13}\text{C}$  NMR (126 MHz,  $\text{CDCl}_3$ ):  $\delta$  171.2, 149.2, 130.6, 128.4, 119.2, 116.2, 110.3, 38.8, 38.1, 35.9, 30.4.

IR ( $\text{cm}^{-1}$ ): 3053, 2925, 1706, 1614, 1470, 1346, 1091

HRMS: calc'd  $[\text{M}+\text{H}]^+$ : 193.133536, found 193.133334

N,N-dimethyl-2-(methyl(phenyl)amino)acetamide (**19c**)

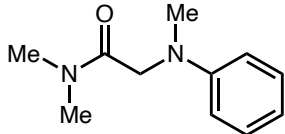

The product standard was isolated using the isolated scale biocatalytic procedure using 1 mol% of NostocER Y219F (74% isolated yield). This happens non-enzymatically in buffer.

$^1\text{H}$  NMR (500 MHz,  $\text{CDCl}_3$ ):  $\delta$  7.22 (dd,  $J$  = 8.8, 7.2 Hz, 2H), 6.76 – 6.64 (m, 3H), 4.11 (s, 2H), 3.04 (d,  $J$  = 3.4 Hz, 6H), 2.97 (s, 3H).

$^{13}\text{C}$  NMR (126 MHz,  $\text{CDCl}_3$ ):  $\delta$  169.6, 149.6, 129.3, 117.3, 112.6, 54.5, 39.5, 36.5, 35.9.

IR ( $\text{cm}^{-1}$ ): 2924, 1652, 1598, 1371, 1216, 1144, 1114, 748, 691

HRMS: calc'd  $[\text{M}+\text{H}]^+$ : 193.133536, found 193.133334

N,N-dimethyl-2-(quinolin-8-yl)acetamide (**25a**)

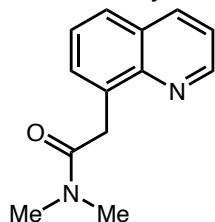

The product standard was isolated using the isolated scale biocatalytic procedure using 1 mol% of Q2 (21% isolated yield only one regioisomer).

NMR yield:

Trial 1: 64%

Trial 2: 66%

$^1\text{H}$  NMR (500 MHz,  $\text{CDCl}_3$ ):  $\delta$  8.90 (dd,  $J$  = 4.2, 1.8 Hz, 1H), 8.14 (dd,  $J$  = 8.2, 1.8 Hz, 1H), 7.73 (dd,  $J$  = 8.2, 1.5 Hz, 1H), 7.71 – 7.68 (m, 1H), 7.54 – 7.47 (m, 1H), 7.40 (dd,  $J$  = 8.3, 4.2 Hz, 1H), 4.41 (s, 2H), 3.11 (s, 3H), 3.00 (s, 3H).

$^{13}\text{C}$  NMR (126 MHz,  $\text{CDCl}_3$ ):  $\delta$  172.1, 149.6, 146.5, 136.5, 134.6, 129.8, 128.5, 127.1, 126.6, 121.2, 38.0, 35.8, 35.7.

IR ( $\text{cm}^{-1}$ ): 2925, 1636, 1522, 1497, 1393, 1131, 812, 784

HRMS: calc'd  $[\text{M}+\text{H}]^+$ : 215.117886, found 215. 11752

N,N-dimethyl-2-(quinolin-5-yl)acetamide (**25b**)

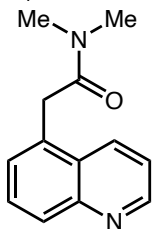

The product standard was isolated using the isolated scale biocatalytic procedure using 100mM  $\text{KPi}$  pH 6 and 1 mol% of GluER T36A Y343F (46% isolated yield 1.8:1:1.4 C5:C4:C8).

NMR yield:

Trial 1: 48% (21% C5, 12% C4, 15% C8) (0.7 C5: others)

Trial 2: 45% (18% C5, 12% C4, 15% C8) (0.7 C5: others)

$^1\text{H}$  NMR (500 MHz,  $\text{CDCl}_3$ ):  $\delta$  8.93 (dd,  $J = 4.3, 1.6$  Hz, 1H), 8.42 – 8.36 (m, 1H), 8.04 (d,  $J = 8.5$  Hz, 1H), 7.65 (dd,  $J = 8.5, 7.1$  Hz, 1H), 7.45 – 7.39 (m, 1H), 7.38 (d,  $J = 1.1$  Hz, 1H), 4.14 (s, 2H), 3.09 (s, 3H), 3.01 (s, 3H).

$^{13}\text{C}$  NMR (126 MHz,  $\text{CDCl}_3$ ):  $\delta$  170.6, 150.3, 148.8, 132.7, 132.1, 129.3, 129.1, 127.7, 127.5, 121.3, 38.2, 38.0, 36.0.

IR ( $\text{cm}^{-1}$ ): 2925, 1641, 1501, 1264, 1136, 1058, 804

HRMS: calc'd  $[\text{M}+\text{H}]^+$ : 215.117886, found 215. 11752

N,N-dimethyl-2-(quinolin-4-yl)acetamide (**25c**)

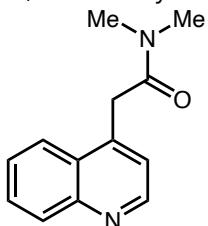

The product standard was isolated using the isolated scale biocatalytic procedure using 100mM KPi pH 6 and 1 mol% of GluER T36A Y343F (46% isolated yield 1.8:1:1.4 C5:C4:C8).

NMR yield:

Trial 1: 48% (21% C5, 12% C4, 15% C8) (0.7 C5: others)

Trial 2: 45% (18% C5, 12% C4, 15% C8) (0.7 C5: others)

$^1\text{H}$  NMR (500 MHz,  $\text{CDCl}_3$ ):  $\delta$  8.85 (d,  $J$  = 4.4 Hz, 1H), 8.14 (dd,  $J$  = 8.5, 1.4 Hz, 1H), 7.98 (dd,  $J$  = 8.6, 1.5 Hz, 1H), 7.73 (ddd,  $J$  = 8.4, 6.9, 1.4 Hz, 1H), 7.59 (ddd,  $J$  = 8.3, 6.9, 1.4 Hz, 1H), 7.25 (d, 1H), 4.16 (s, 2H), 3.05 (d,  $J$  = 10.5 Hz, 6H).

$^{13}\text{C}$  NMR (126 MHz,  $\text{CDCl}_3$ ):  $\delta$  169.7, 150.3, 148.5, 141.5, 130.5, 129.5, 127.7, 127.0, 123.5, 121.5, 38.0, 37.8, 35.9.

IR ( $\text{cm}^{-1}$ ): 2924, 1641, 1507, 1393, 1262, 1136, 810, 782, 756

HRMS: calc'd  $[\text{M}+\text{H}]^+$ : 215.117886, found 215. 11752

N,N-dimethyl-2-(pyrazin-2-yl)acetamide (**26**)

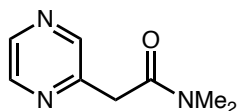

The product standard synthesized via the following method:

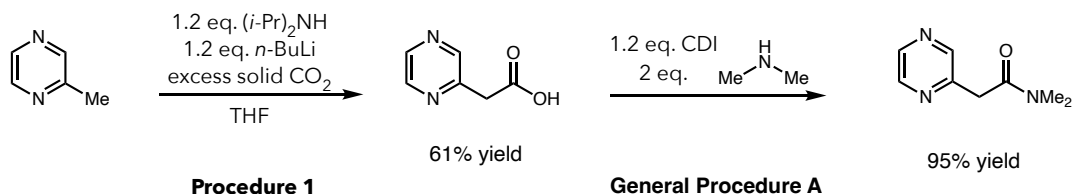

**Procedure 1:** Using a modified procedure from Nizamov et. al<sup>55</sup>, dry THF was added to a flame dried flask charged with a magnetic stir bar and placed under inert atmosphere. It was cooled to -78°C Diisopropylamine (1.2 equiv) was added and then *n*-butyllithium (2.5M in hexanes, 1.2 equiv) was added slowly and the reaction mixture was allowed to stir at -78°C for 20 minutes. 2-methylpyrazine was added dropwise and the reaction was stirred for 1 hour at -78°C. Dry ice was placed into a syringe with a long needle and the needle was placed inside the reaction flask to sparge it with CO<sub>2</sub> for quenching. After 10 minutes, dry ice was directly added to the reaction flask. The cooling bath was removed and the reaction mixture was allowed to warm up at room temperature. Water was then added. The liquid phases were separated. The aqueous phase was adjusted to pH 3 and re-extracted five times with ethyl acetate. The organic extracts were pooled, dried over sodium sulfate and concentrated *in vacuo* to yield 2-(pyrazin-2-yl)acetic acid in 61% yield.

General Procedure A was then used with dimethylamine to yield the product standard in 95% yield

NMR yield:

Trial 1: 45%

Trial 2: 41%

<sup>1</sup>H NMR (500 MHz, CDCl<sub>3</sub>): δ 8.56 (s, 1H), 8.46 – 8.37 (m, 2H), 3.87 (s, 2H), 3.07 (s, 3H), 2.93 (s, 3H).

<sup>13</sup>C NMR (126 MHz, CDCl<sub>3</sub>): δ 169.0, 151.8, 145.7, 143.9, 142.8, 40.7, 37.8, 35.6.

IR (cm<sup>-1</sup>): 2929, 1637, 1496, 1395, 1141, 1019, 725

HRMS: calc'd [M+H]<sup>+</sup>: 166.097486, found 166.09695



2-(4-cyanopyridin-3-yl)-N,N-dimethylacetamide (**27**)

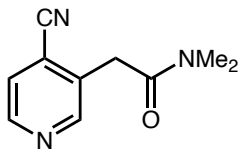

The product standard was isolated using the isolated scale biocatalytic procedure using 1 mol% of Q2 (14% yield). It was inseparable from the doubly alkylated adduct. The proposed structure for the doubly alkylated adduct is below.

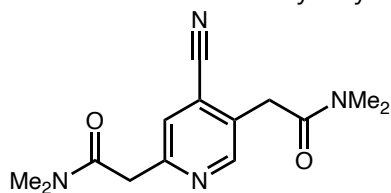

NMR yield:

Trial 1: 40% C3 adduct, 11% di-alkylated product

Trial 2: 35% C3 adduct, 9% di-alkylated product

$^1\text{H}$  NMR (500 MHz,  $\text{CDCl}_3$ ):  $\delta$  8.71 (s, 1H), 8.68 (d,  $J$  = 5.0 Hz, 1H), 7.51 (d,  $J$  = 5.0 Hz, 1H), 3.89 (s, 2H), 3.18 (s, 3H), 3.02 (s, 3H).

$^{13}\text{C}$  NMR (126 MHz,  $\text{CDCl}_3$ ):  $\delta$  167.9, 152.3, 148.9, 133.4, 125.2, 121.6, 115.8, 37.6, 36.1, 36.0.

IR ( $\text{cm}^{-1}$ ): 2921, 2233, 1645, 1506, 1396, 1263, 1138, 840

HRMS: calc'd  $[\text{M}+\text{H}]^+$ : 190.099286, found 190.09722

## Part IX. Product Derivatization and Characterization:

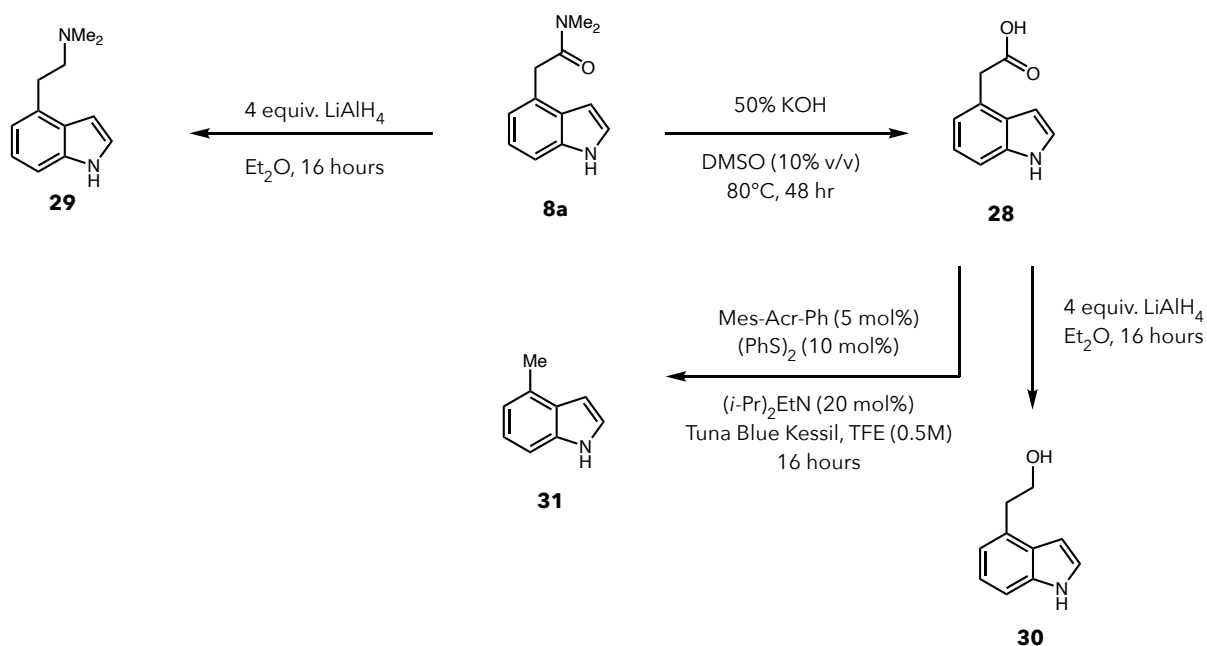

Supplemental Figure 15: Product Derivatization Map

### Synthesis of 2-(1H-indol-4-yl)acetic acid (**28**):

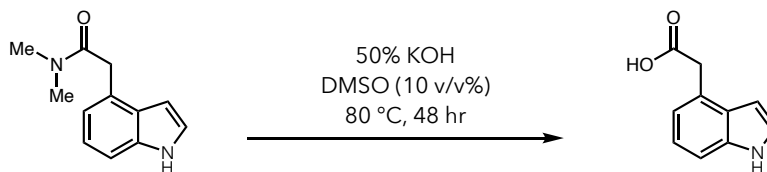

In a round bottle flask equipped with a stir bar was charged with the amide product (1 mmol, 203 mg) from gram scale reaction. The flask was sealed with a septum, evacuated, and backfilled with dry nitrogen. Aqueous degassed KOH (50%, 20 mL) and DMSO (10% v/v) were added via syringe. The reaction mixture was allowed to stir at 80°C overnight. Upon completion as determined by TLC analysis, the flask was cooled to at 0°C and concentrated HCl (12M) was added (until pH = 1). The aqueous layer was extracted with EtOAc (45 mL x 3). The combined organic layers were dried with  $\text{Na}_2\text{SO}_4$  and concentrated with the aid of a rotary evaporator without further purification (>99% yield). All spectra match reported values.<sup>56</sup>

$^1\text{H}$  NMR (500 MHz, Acetone)  $\delta$  10.20 (s, 1H), 7.34 - 7.23 (m, 2H), 7.04 (t,  $J$  = 7.7 Hz, 1H), 6.95 (d,  $J$  = 7.1 Hz, 1H), 6.56 (t,  $J$  = 2.7 Hz, 1H), 3.85 (s, 2H).

$^{13}\text{C}$  NMR (126 MHz, Acetone)  $\delta$  172.9, 137.0, 128.6, 127.0, 125.2, 121.9, 120.6, 120.6, 110.9, 100.8, 39.3.

Synthesis of 2-(1*H*-indol-4-yl)-*N,N*-dimethylethan-1-amine (**29**):

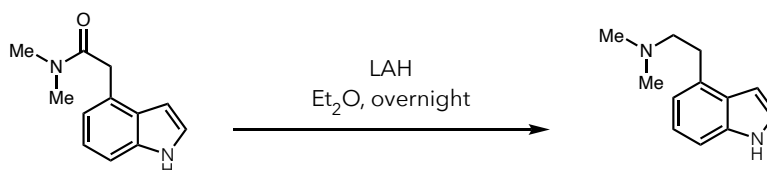

In an oven-dried round bottle flask equipped with a stir bar was charged with lithium aluminum hydride (LAH, 4.0 equiv.). Anhydrous  $\text{Et}_2\text{O}$  (0.25 M) was added via syringe. Dimethyl amide derived from enzymatic reaction (1.0 equiv.) was then added (Caution: gas evolution observed). The reaction mixture was stirred at rt overnight. Upon completion as determined via TLC analysis, aqueous NaOH (10%) was added dropwise to quench the reaction until white gel was formed (Caution: gas evolution observed). The resulting solution was filtered, concentrated with the aid of a rotary evaporator. The filtered product produced a white solid. (82% yield). All spectra match reported values.<sup>51</sup>

$^1\text{H}$  NMR (500 MHz,  $\text{CDCl}_3$ )  $\delta$  9.00 (s, 1H), 7.40 – 7.31 (m, 1H), 7.27 (d,  $J$  = 2.8 Hz, 1H), 7.24 (d,  $J$  = 7.8 Hz, 1H), 7.07 (d,  $J$  = 7.1 Hz, 1H), 6.71 (ddd,  $J$  = 3.2, 2.1, 1.0 Hz, 1H), 3.28 – 3.20 (m, 2H), 2.89 – 2.79 (m, 2H), 2.51 (s, 7H).

$^{13}\text{C}$  NMR (126 MHz,  $\text{CDCl}_3$ )  $\delta$  136.0, 132.3, 127.4, 124.1, 122.1, 119.4, 109.4, 100.6, 60.6, 45.4, 32.0.

Synthesis of 2-(1*H*-indol-4-yl)ethan-1-ol (**30**):

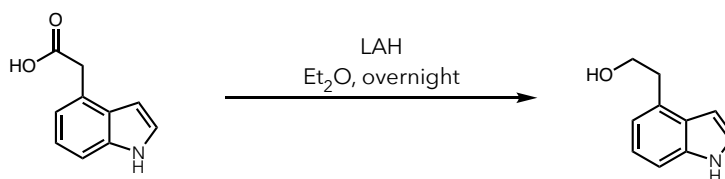

In an oven-dried round bottle flask equipped with a stir bar was charged with lithium aluminum hydride (LAH, 4.0 equiv.). Anhydrous  $\text{Et}_2\text{O}$  (0.25 M) was added via syringe. Carboxylic acid (1.0 equiv.) derived from enzymatic reaction was then added (Caution:

gas evolution observed). The reaction mixture was stirred at rt overnight. Upon completion as determined via TLC analysis, aqueous NaOH (10%) was added dropwise to quench the reaction until white gel was formed (Caution: gas evolution observed). The resulting solution was filtered, concentrated with the aid of a rotary evaporator. The filtered product was a pure oil. (90% yield) All spectra match reported values.<sup>57</sup>

<sup>1</sup>H NMR (500 MHz, CDCl<sub>3</sub>)  $\delta$  8.26 (s, 1H), 7.30 (d, *J* = 8.2 Hz, 1H), 7.23 – 7.19 (m, 1H), 7.19 – 7.12 (m, 1H), 6.99 (d, *J* = 7.1 Hz, 1H), 6.62 (ddd, *J* = 3.2, 2.2, 1.1 Hz, 1H), 3.99 (t, *J* = 6.5 Hz, 2H), 3.19 (t, *J* = 6.5 Hz, 2H).

<sup>13</sup>C NMR (126 MHz, CDCl<sub>3</sub>)  $\delta$  136.0, 130.5, 127.7, 124.1, 122.3, 120.3, 109.8, 101.0, 63.2, 37.0.

Synthesis of 4-methylindole (**31**):

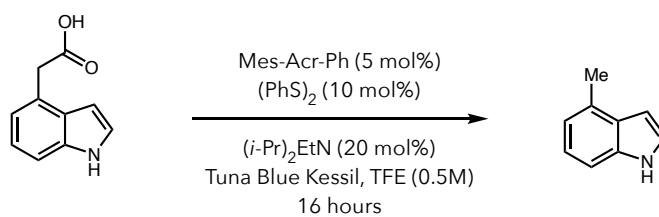

4-methylindole (**31**) was synthesized using a modified procedure from Griffin et. al.<sup>58</sup> To a flame-dried one dram round bottom flask (25 ml) equipped with a magnetic stir bar was added the carboxylate acid derived from enzymatic reaction (1 equiv., 130 mg, 0.74 mmol), Mes- Acr-Ph (5 mol%), and diphenyl disulfide (10 mol%). The flask was sealed with a septum, evacuated, and backfilled with dry nitrogen and sparged trifluoroethanol was added to achieve a concentration of 0.5 M with respect to acid substrate. N,N-diisopropylethylamine (20 mol%), was added, and the flask was sealed with a rubber septum and electric tape. The reaction was irradiated with 450 nm Kessil lamps and stirred at ambient temperature from 24 hours. Upon completion, the solvent was removed in vacuo and the product was further purified by flash chromatography to yellow pale yellow stinky smell product (26% yield). All spectra match reported values.<sup>59</sup>

<sup>1</sup>H NMR (500 MHz, CDCl<sub>3</sub>)  $\delta$  8.13 (s, 1H), 7.25 (d, *J* = 8.0 Hz, 1H), 7.20 (t, *J* = 2.8 Hz, 1H), 7.13 (t, *J* = 7.6 Hz, 1H), 6.96 – 6.92 (m, 1H), 6.59 (ddd, *J* = 3.2, 2.1, 1.0 Hz, 1H), 2.59 (s, 3H).

$^{13}\text{C}$  NMR (126 MHz,  $\text{CDCl}_3$ )  $\delta$  135.6, 130.4, 127.9, 123.6, 122.2, 120.1, 108.7, 101.2, 19.0.

## **Part X. Charge Transfer Complex Studies**

### **Identification of Charge Transfer Complexes in Proteins Used in this Study**

All samples were prepared in an MBraun glovebox with O<sub>2</sub> level less than 5 ppm. Cuvettes were specially designed with a GL18 cap to maintain oxygen free conditions for the duration of the experiment.

To generate the charge-transfer state in solution 200 nmol of ERED is diluted to a final volume of 1.0 mL in KP<sub>i</sub> buffer (pH = 9.0) and absorption spectra is taken. The cuvette is taken back into the MBraun and 120 nmol (1.2 equiv) sodium dithionite is added to generate FMN<sub>hq</sub> and an absorption spectrum is taken. 9  $\mu$ L or 18  $\mu$ L of substrate **1** is added (3800:1 mol ratio substrate:enzyme) to the solution and an absorption spectrum is taken, showing a weak new absorptive feature at ~500 nm. At this stage, if the scatter has increased (this was noticed for mutants of GluER T36A), the solution was filtered through cellulose acetate syringe filters. Then the solution was removed from the cuvette in the MBraun and placed in a vial, 8.2 mg of indole was added as a solution in 50  $\mu$ L of degassed THF and the solution was filtered through a cellulose acetate syringe filter again into the cuvette to remove any insoluble indole. The final absorption spectrum was then taken. A strong new absorptive feature at 360 nm and 480 nm appeared for PagER (Supplemental Figure 18, red trace). The mixture is then removed from the cuvette and placed into Amicon Ultra Centrifugal Filters (0.5 mL, 10 kDa cutoff) and centrifuged in the MBraun at 12500 rpm for 3 minutes to remove small molecules. The protein is resuspended in KP<sub>i</sub> buffer and the centrifugal process is repeated 3 times. Then the resuspended protein is transferred back to the cuvette and a spectrum is taken to show recovered FMN<sub>ox</sub> (Supplemental Figure 18, purple trace). This indicates ground state electron transfer occurs with PagER after addition of both substrates. When this centrifugation step was repeated with the solution containing GluER T36A Y343F T25L T231V G270M FMN<sub>hq</sub>, substrate **1** and indole, the FMN<sub>hq</sub> was recovered (Supplemental Figure 25), suggesting the protein's ability to catalyze ground state electron transfer comes from subsequent mutations. If the same experiment is repeated with PagER but it is centrifuged after the chloroamide is added, the FMN<sub>hq</sub> is recovered, suggesting the arene is necessary for ground state reduction of the chloroamide (Supplemental Figure 19). Due to the increased scatter from protein aggregation when indole was added when a CT state study was conducted with GluER T36A Y343F T25L T231V G270M Q232W, the spectra observed when both substrates are added is inconclusive (Supplemental Figure 26). However, due to the ability of GluER T36A Y343F T25L T231V G270M Q232W to catalyze the coupling with light irradiation, it is likely this protein can also do ground state electron transfer.

Due to the inability to reduce AspER with sodium dithionite (Supplemental Figure 16, blue trace), stoichiometric NADPH was used as the reductant and the procedure was repeated as detailed above except using 5 mg of indole instead of 8.2 mgs. Full reduction was still not possible (Supplemental Figure 17, red trace), however the spectral features upon addition of substrate are more pronounced (Supplemental Figure 17, blue and green traces). Due to the incomplete reduction using this method, it is impossible to comment on the absorptivity of the CT state, however it suggests a CT state pathway is available to AspER.

The CT state for all mutants and AspER are shown in Supplemental Figures 16-28. No CT state is observed with free FMN (Supplemental Figure 29).

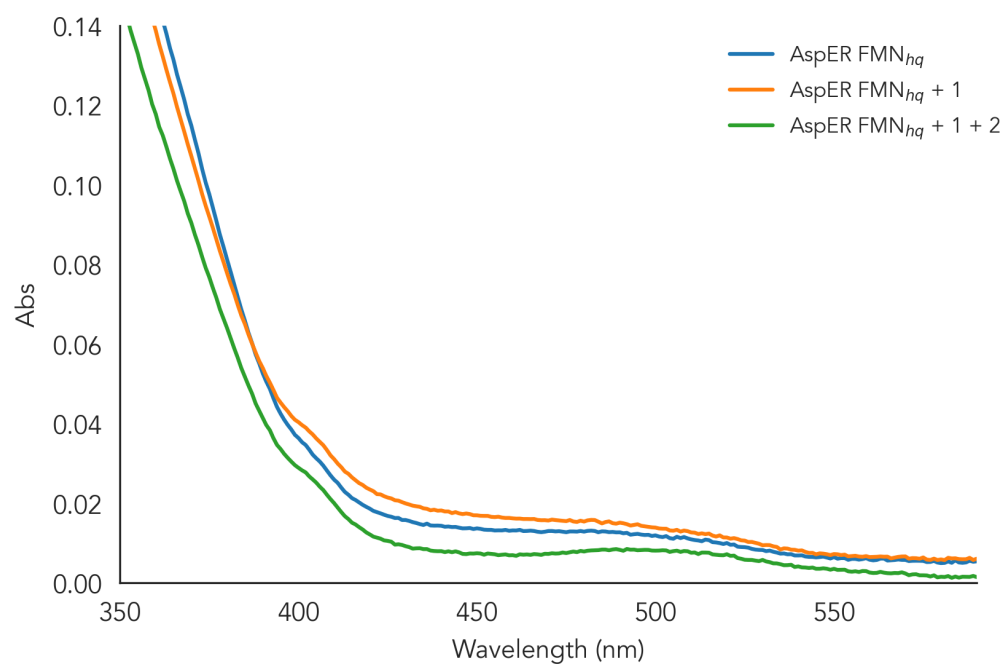

Supplemental Figure 16: Charge Transfer Studies with AspER using sodium dithionite



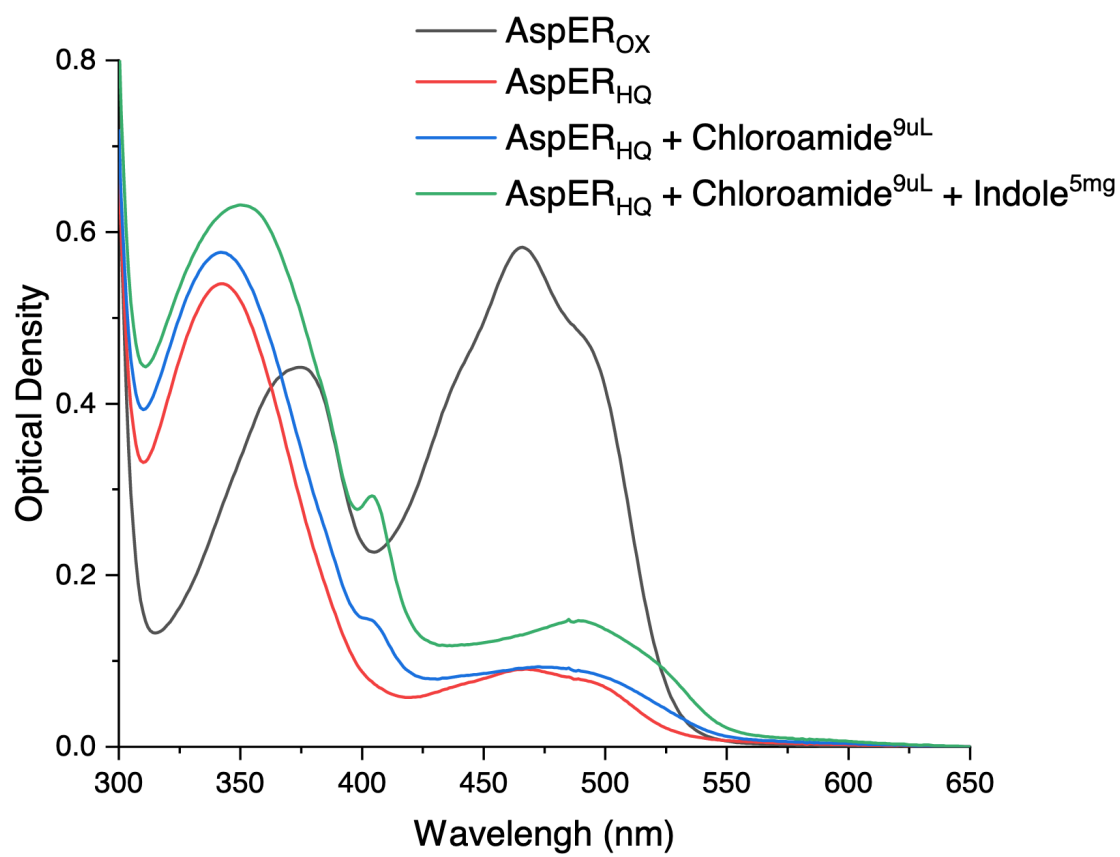

Supplemental Figure 17: Charge Transfer Studies with AspER using NADPH

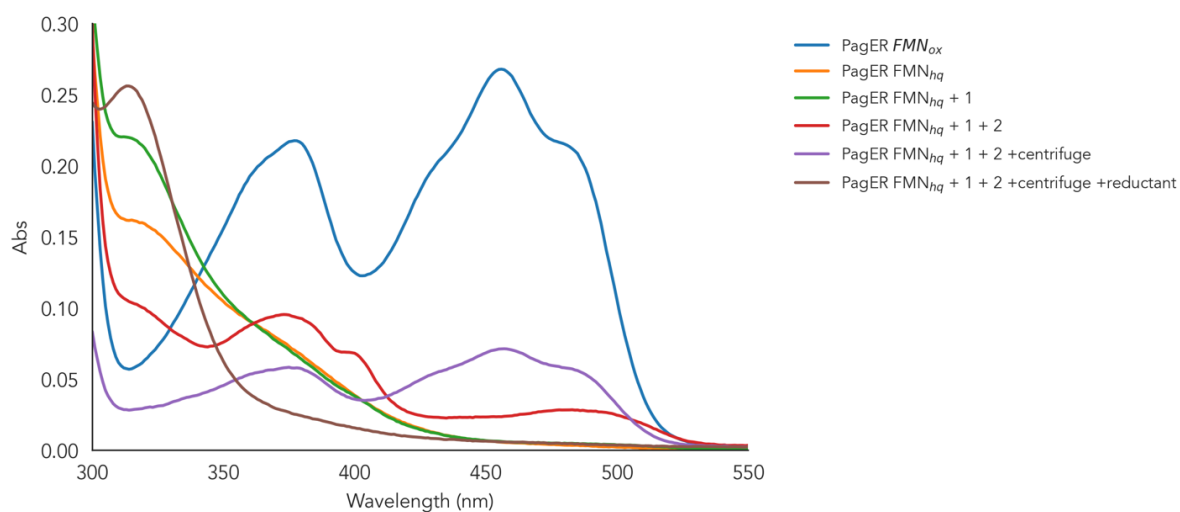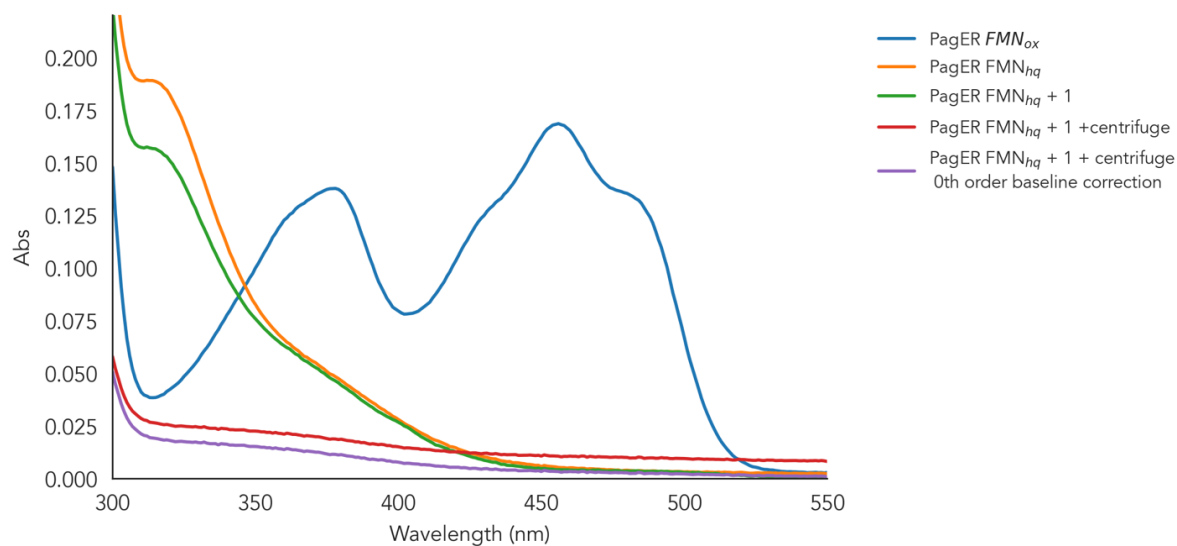

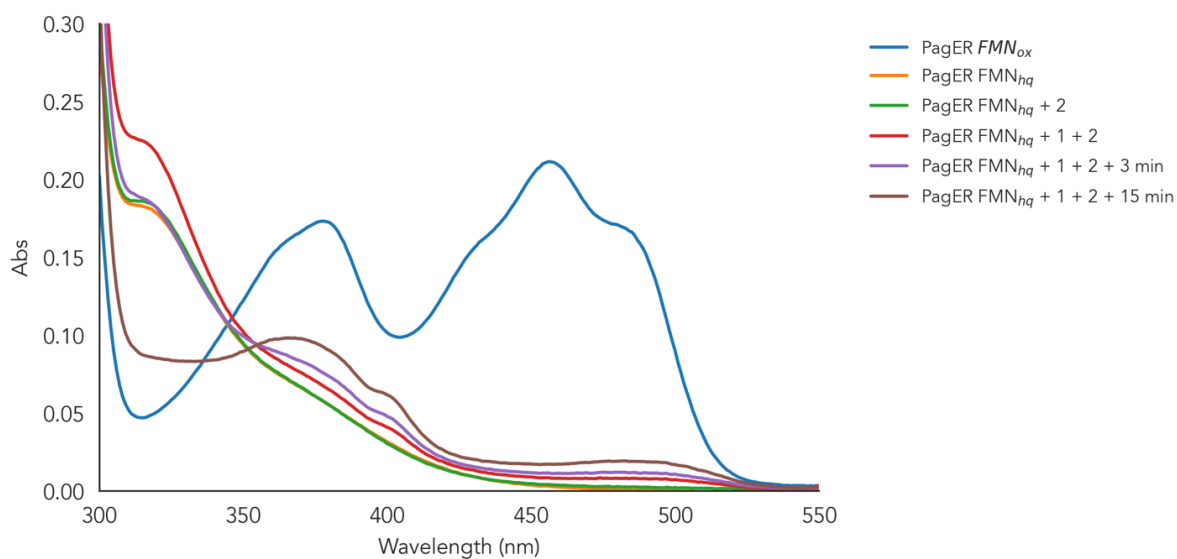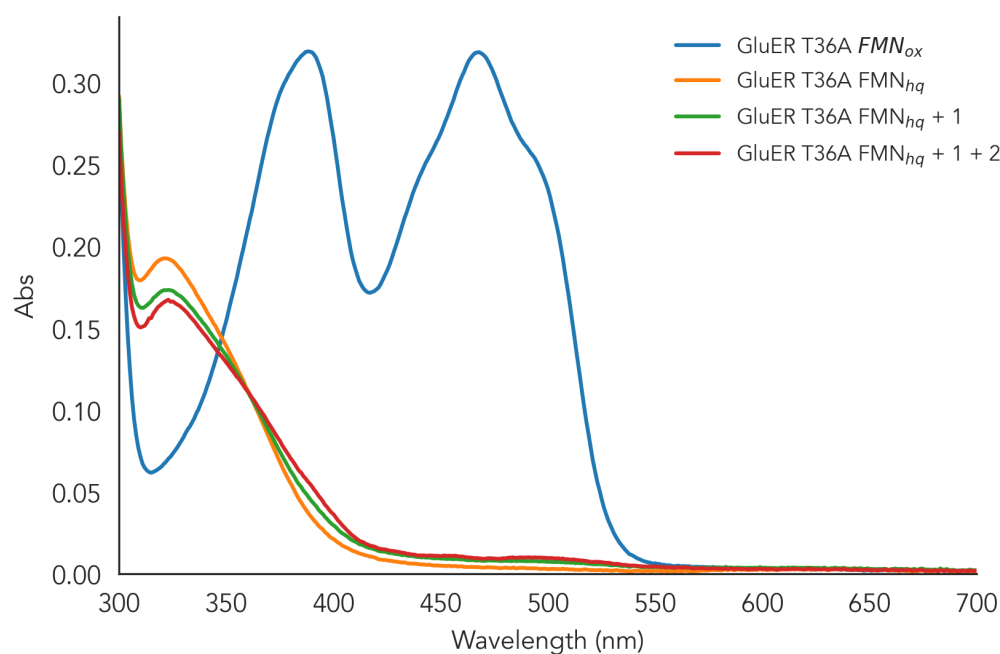

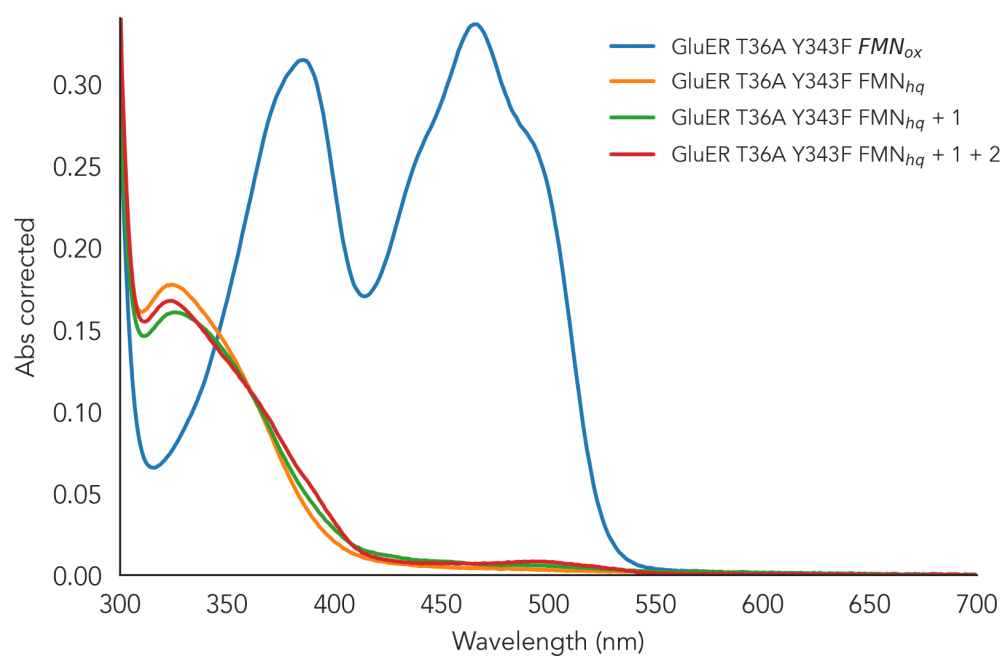

Supplemental Figure 22: Charge Transfer Studies with GluER T36A Y343F

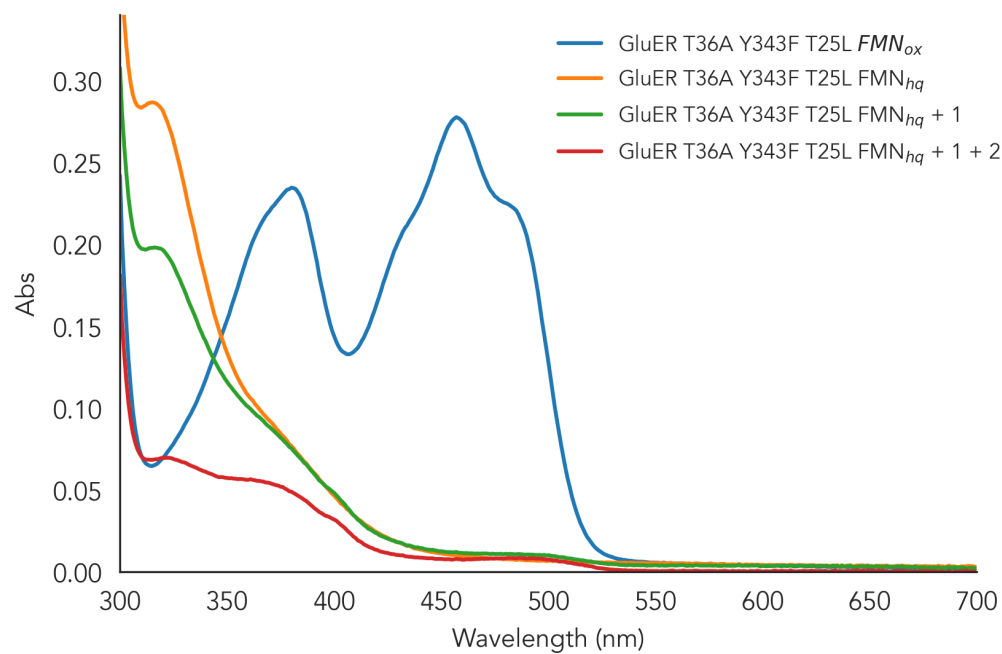

Supplemental Figure 23: Charge Transfer Studies with GluER T36A Y343F T25L

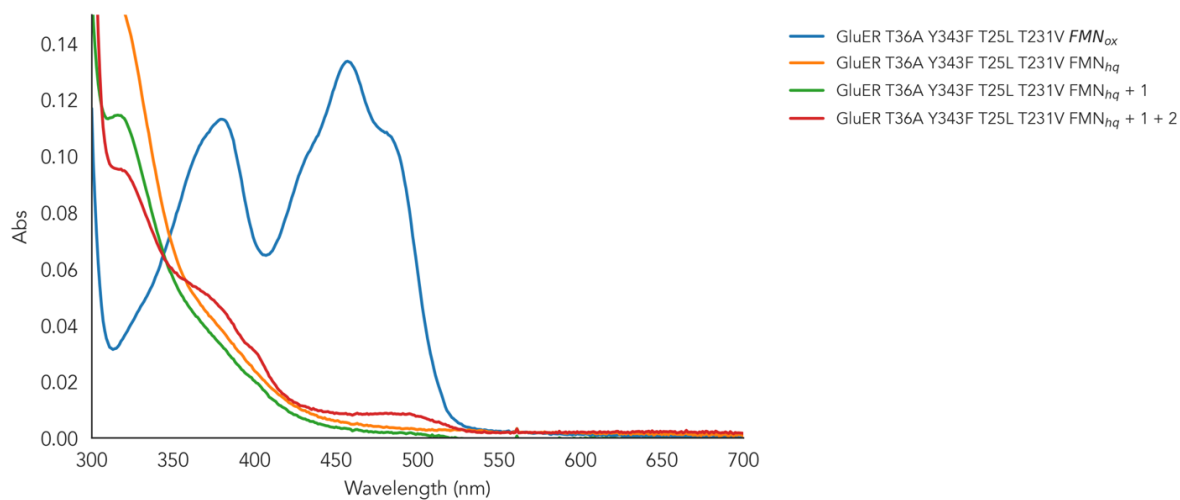

Supplemental Figure 24: Charge Transfer Studies with GluER T36A Y343F T25L T231V

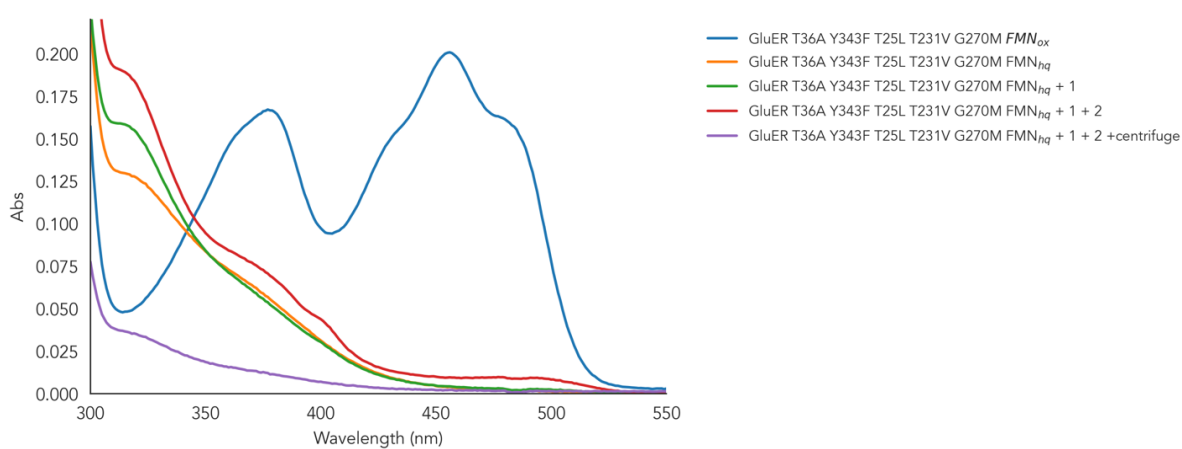

Supplemental Figure 25: Charge Transfer Studies with GluER T36A Y343F T25L T231V G270M and centrifugation

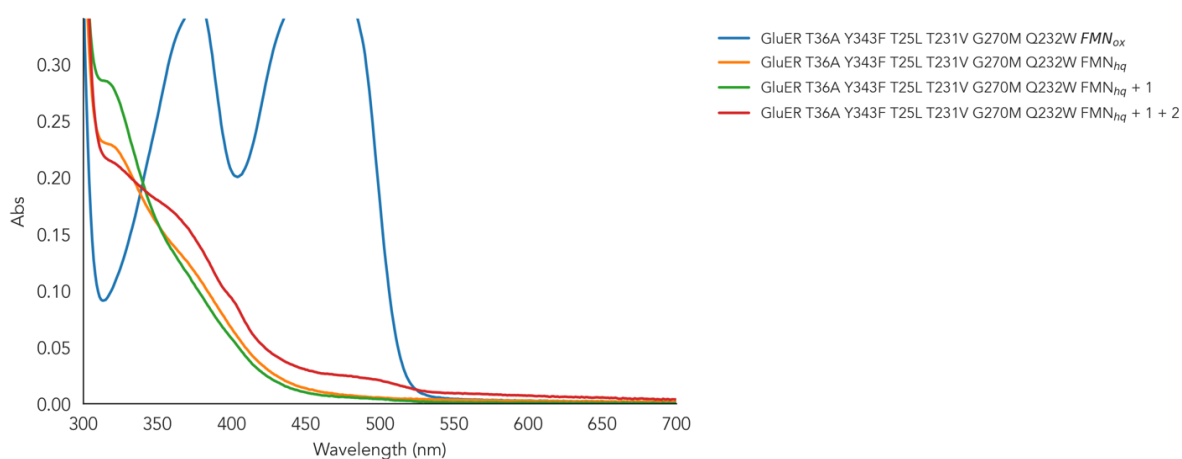

Supplemental Figure 26: Charge Transfer Studies with GluER T36A Y343F T25L T231V G270M Q232W

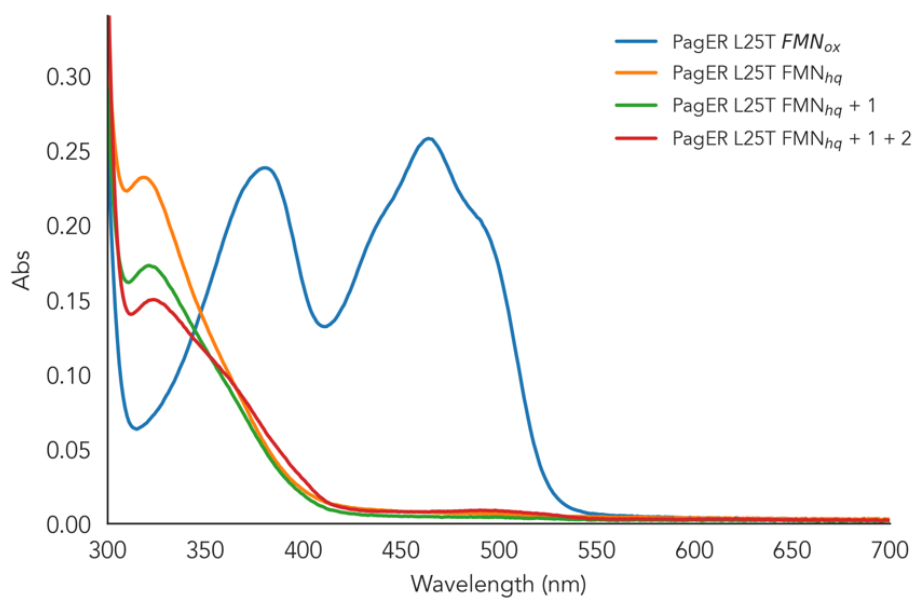

Supplemental Figure 27: Charge Transfer Studies with PagER L25T

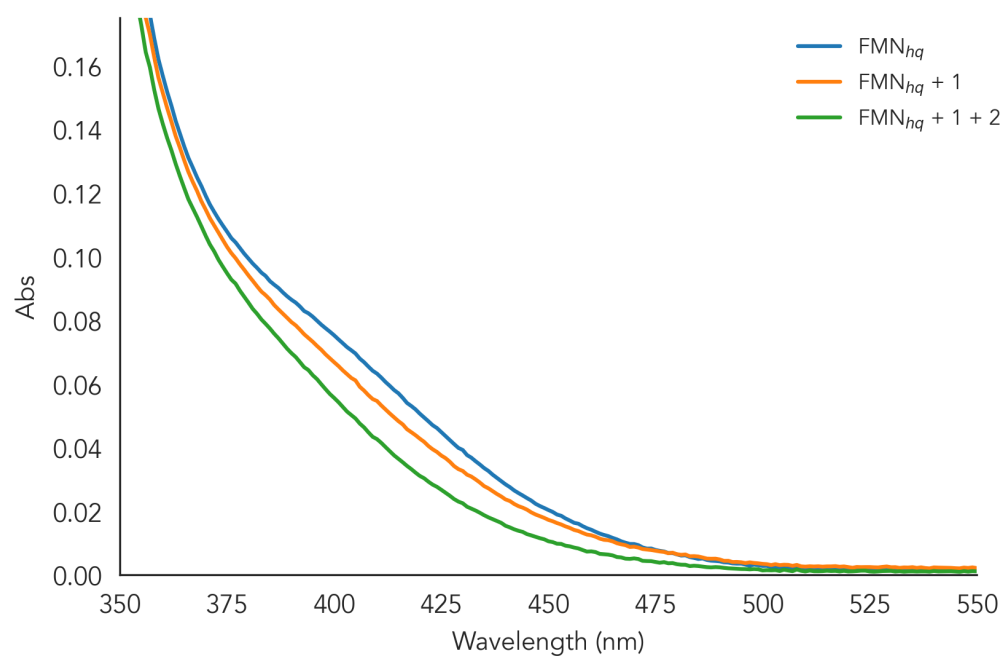

Supplemental Figure 28: Charge Transfer Studies with FMN

## Part XI: Transient Absorption Spectroscopy for AspER

The samples were prepared in 100mM Tris buffer pH 9 with two equivalents of glucose, 1 mol% of NADP<sup>+</sup>, and 1 mg of desalted and lyophilized GDH to mimic the conditions of the reaction. Substrates were added with 5mg of indole in 50uL of THF and 4uL of neat chloramide. The total sample volume was kept at 1004uL or 1000uL absent of chloramide. The transient absorption samples were excited at 370 nm with 250nJ of energy. The samples were continuously stirred and translated during the duration of the experiment.

A sequential model for fitting of each iteration of AspER hydroquinone was employed. In the presence of the turnover system, AspER exhibits a tri-exponential decay with lifetimes of 3 ps, 42 ps, and 475 ps. The longest lifetime is attributed to NADP<sup>+</sup>/H + FMN<sub>hq</sub> interactions as it was not observed when sodium dithionite was used as a reductant for the spectroscopy. Upon addition of the indole, a slight change in lifetime is observed with slight increases in the two shortest time components and a decrease in the longest but spectrally similar to the spectroscopy conducted in the absence of substrate.

More significant changes were observed with the addition of the chloramide. The results indicate that HAT is not a favored pathway. Instead, we observe a decay back to the ground state and there is no formation of any oxidized flavin or long-lived transient spectrum. The lifetimes are similar to those observed when only indole is present. Spectrally they are shifted, possibly indicating when the chloroamide is in the active site, it prefers back electron transfer over mesolytic cleavage. It is only upon the addition of both components, we see a drastic change in both lifetime and spectrum. The first component decays in 21 ps and it can be attributed to the absorption spectrum of the neutral semiquinone. The mesolytic cleavage is not observed indicating that the chloride ejection step and bond formation to the indole is almost concerted, whereby an electron is returned to the neutral flavin semiquinone reforming the anionic hydroquinone within this timescale. The second component of 323 ps is observed in all samples which is attributed to the possible FMN<sub>hq</sub> + NADP<sup>+</sup>/H interaction. Finally, a long-time bleach is observed at 450nm indicating the loss of the charge-transfer complex formed between the chloroamide, indole, and flavin hydroquinone.



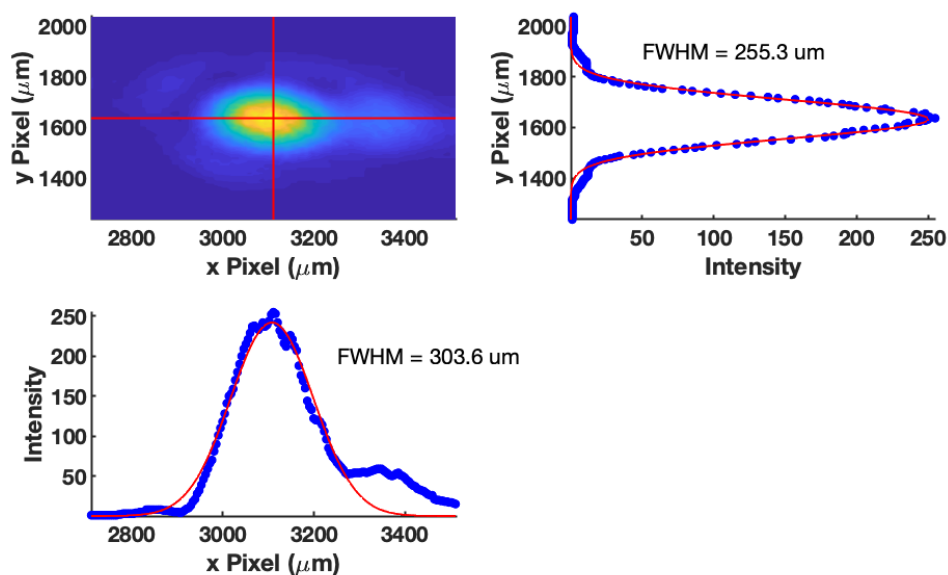

Supplemental Figure 29: Excitation beam profile fit with gaussian shape to extract the full-width half maximum (FWHM).

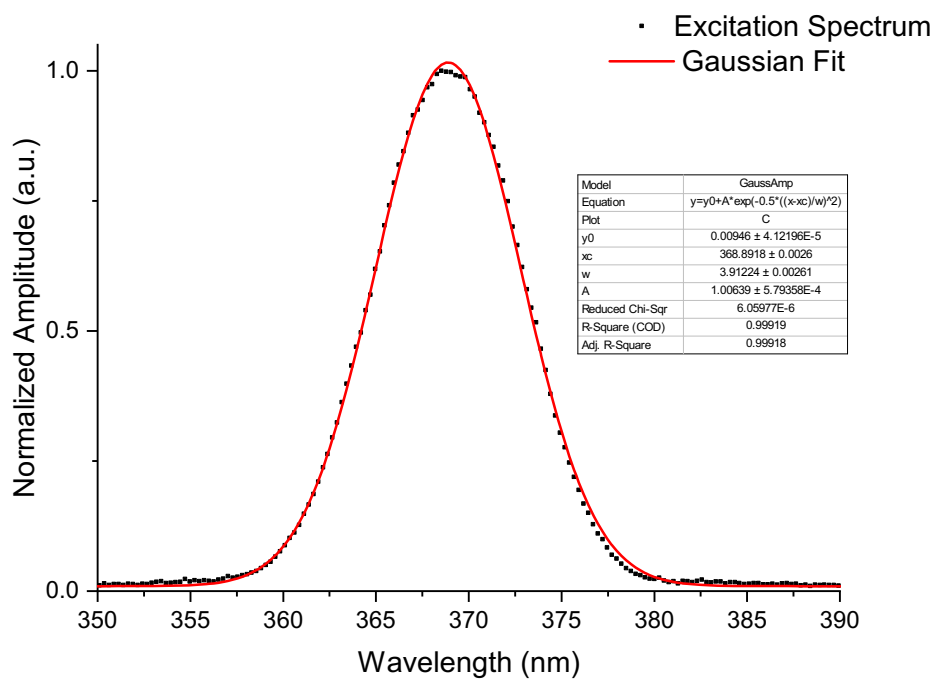

Supplemental Figure 30: Gaussian Fit to excitation spectrum

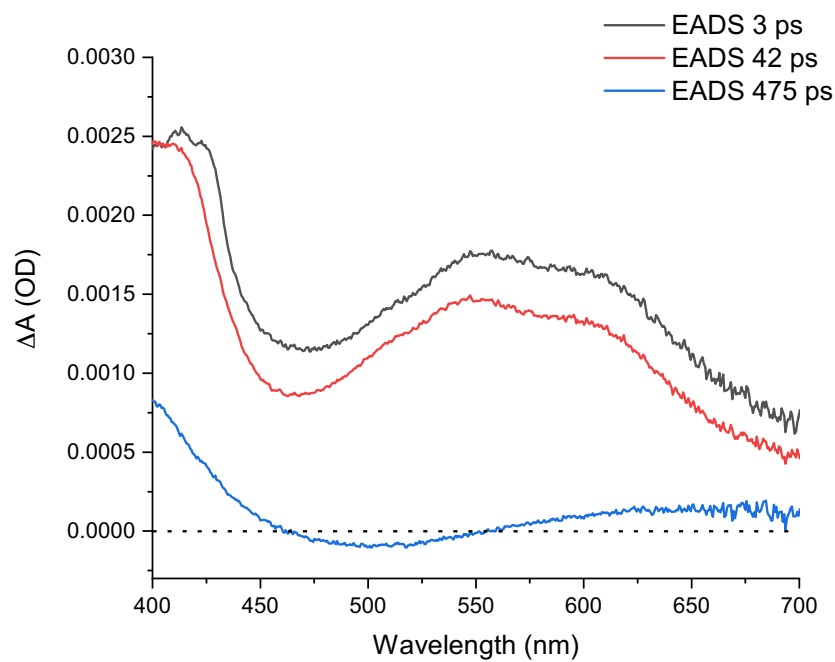

Supplemental Figure 31: AspER hydroquinone global analysis

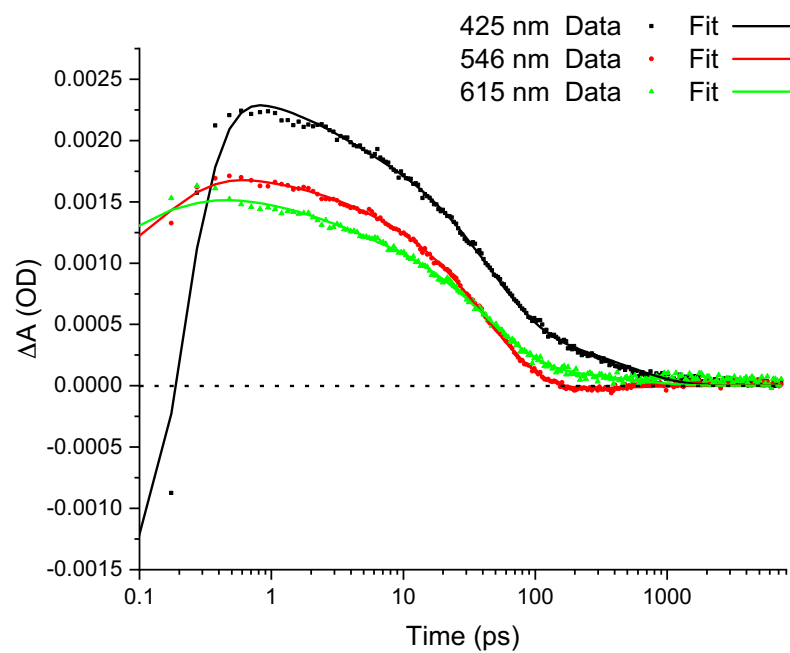

Supplemental Figure 32: AspER hydroquinone global analysis fits at selected wavelengths

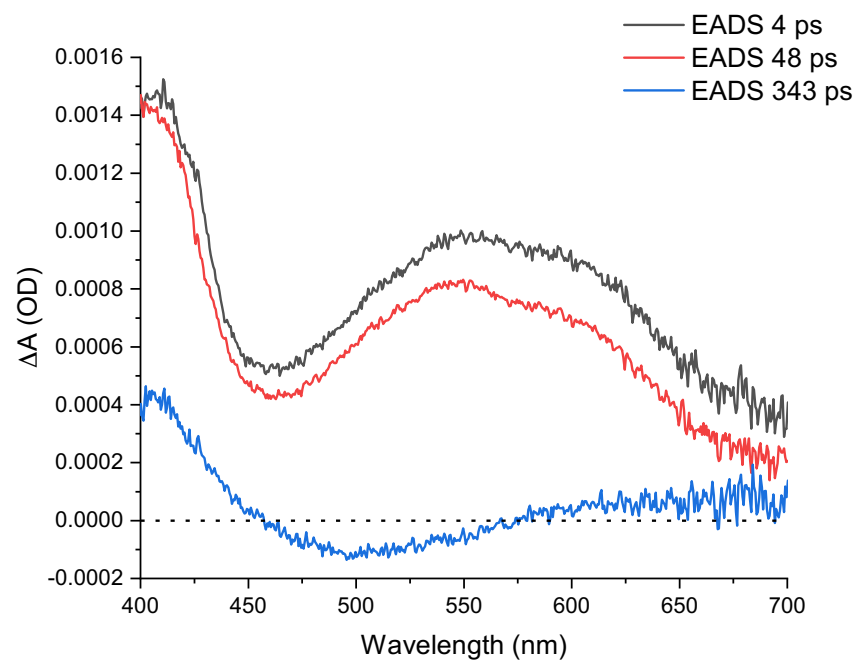

Supplemental Figure 33: AspER hydroquinone with indole global analysis

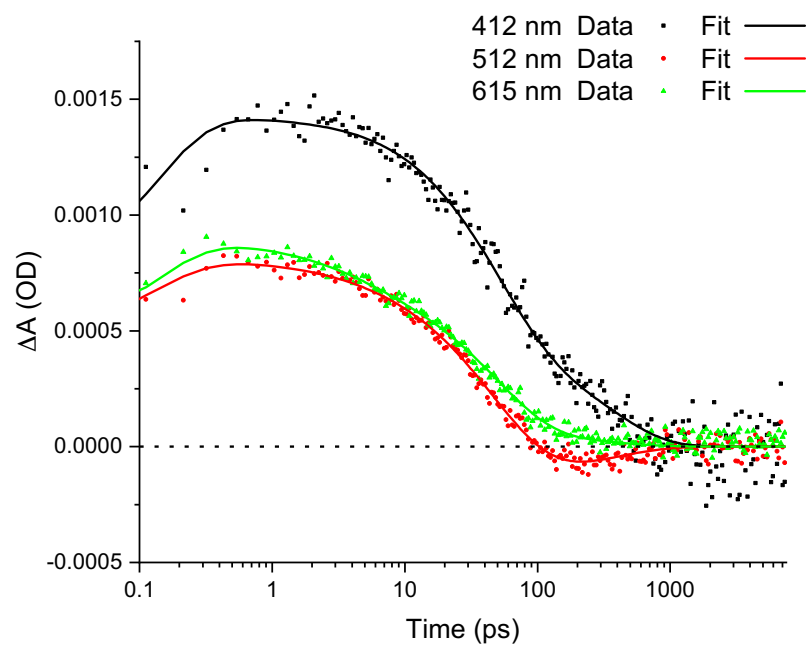

Supplemental Figure 34: AspER hydroquinone with indole global analysis fits at selected wavelengths

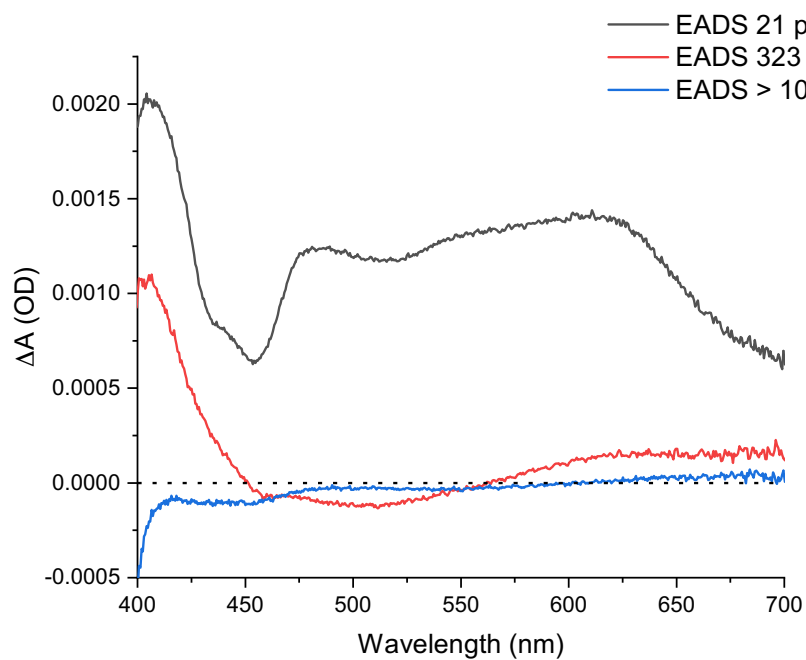

Supplemental Figure 35: AspER hydroquinone with amide and indole global analysis

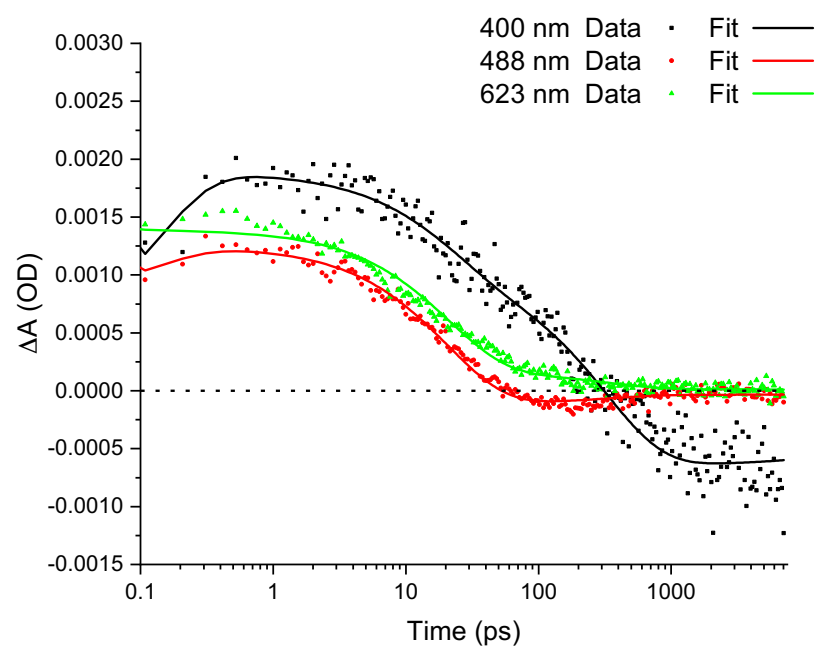

Supplemental Figure 36: AspER hydroquinone with amide and indole global analysis fits at selected wavelengths

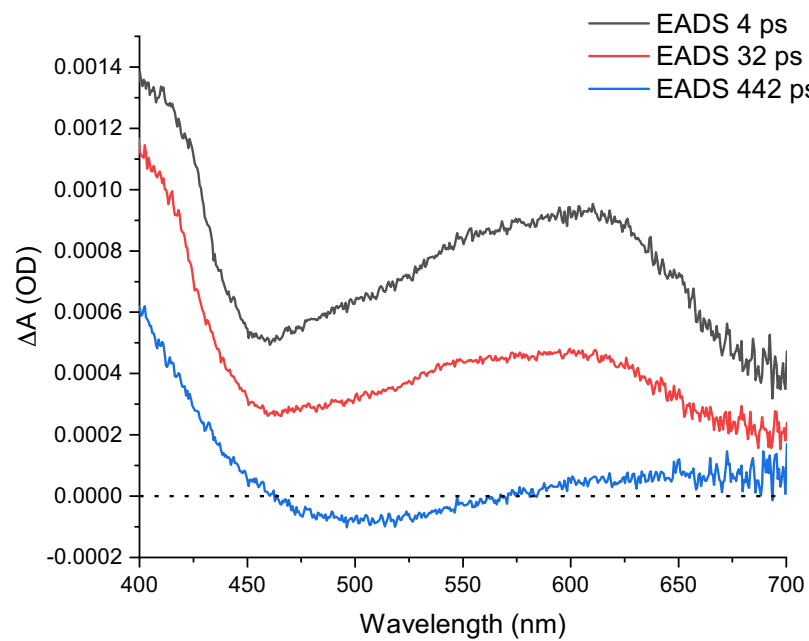

Supplemental Figure 37: AspER hydroquinone with amide global analysis

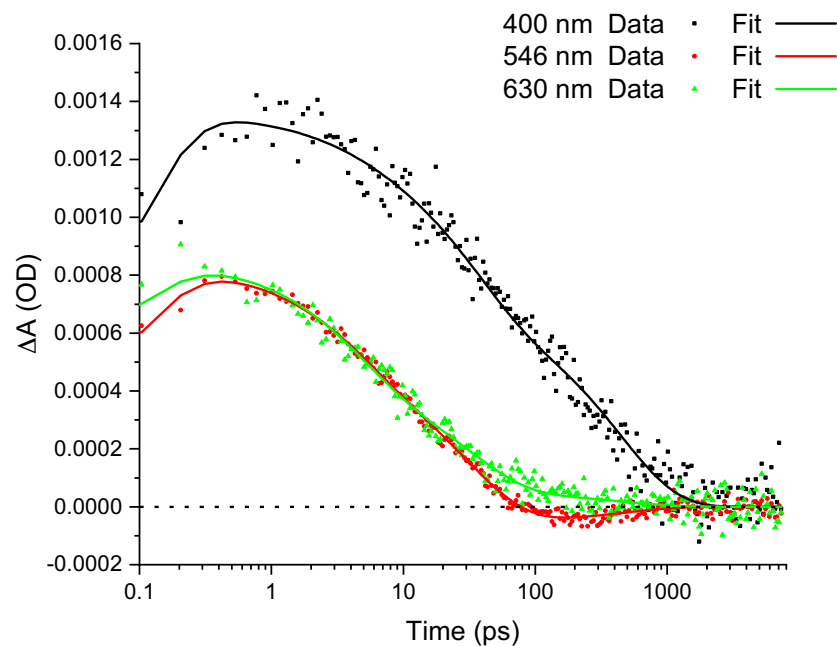

Supplemental Figure 38: AspER hydroquinone with amide global analysis fits at selected wavelengths

## **Part XII: Mechanistic Studies**

### **Electron Paramagnetic Resonance (EPR) Procedure:**

All samples were prepared in an MBraun glovebox with O<sub>2</sub> level less than 0.1 ppm. Wilmad Precision Quartz EPR tubes were used.

200  $\mu$ L of a 0.3 mM solution was prepared in 100 mM Tris pH 9 and added to the EPR tube under strict anaerobic conditions. The EPR tube was capped and wrapped in parafilm to decrease oxygen exposure. The tubes were then irradiated with cyan LEDs (50 W Chanzon high power LED chip,  $\lambda_{\text{max}}$  = 490 nm, measured photon flux = 12,000 mW/m<sup>2</sup> s) for 30 minutes. A fan was used to maintain room temperature during the irradiation. After 30 minutes, the tubes were flash frozen using liquid nitrogen. All experiments were performed with a Bruker EMX plus spectrometer cooled with liquid helium to 8K, with continuous wave X-band frequency of 9.38GHz and a time constant of 5.12ms and conversion time of 60ms. The microwave cavity was tuned for each sample using the Bruker Xenon software. The lowest possible microwave power 0.2  $\mu$ W was used.

#### EPR Baseline correction

The EPR spectra were baseline corrected using the procedure outlined in Dellalunga et.al.<sup>61</sup> The signal was fit with a third order polynomial with the radical signal (3326 – 3370 Gauss) ignored in the fitting procedure. The subsequent fits were then subtracted from the data. The spectra pre and post fit are shown in Supplemental Figure 39.

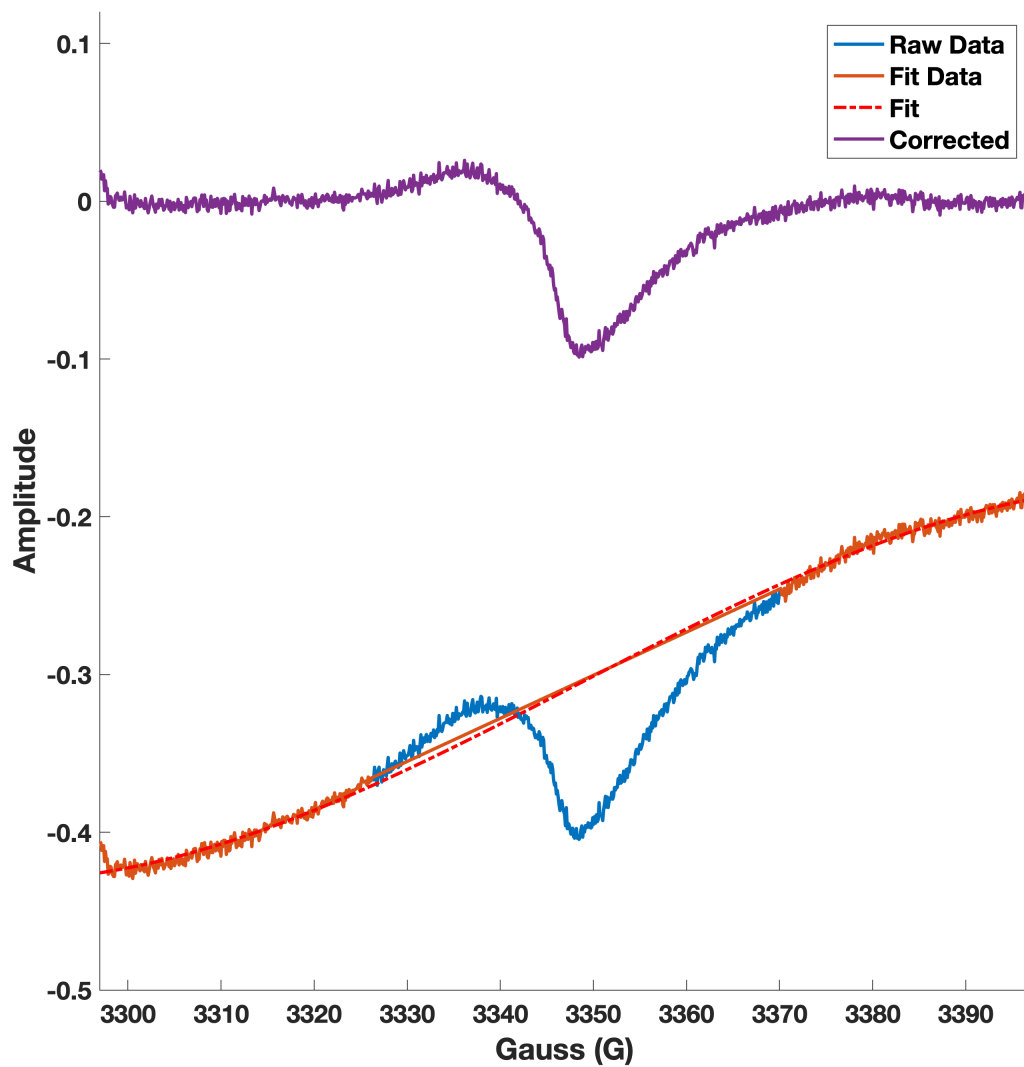

Supplemental Figure 39: Raw Data Fit and Baseline Correction



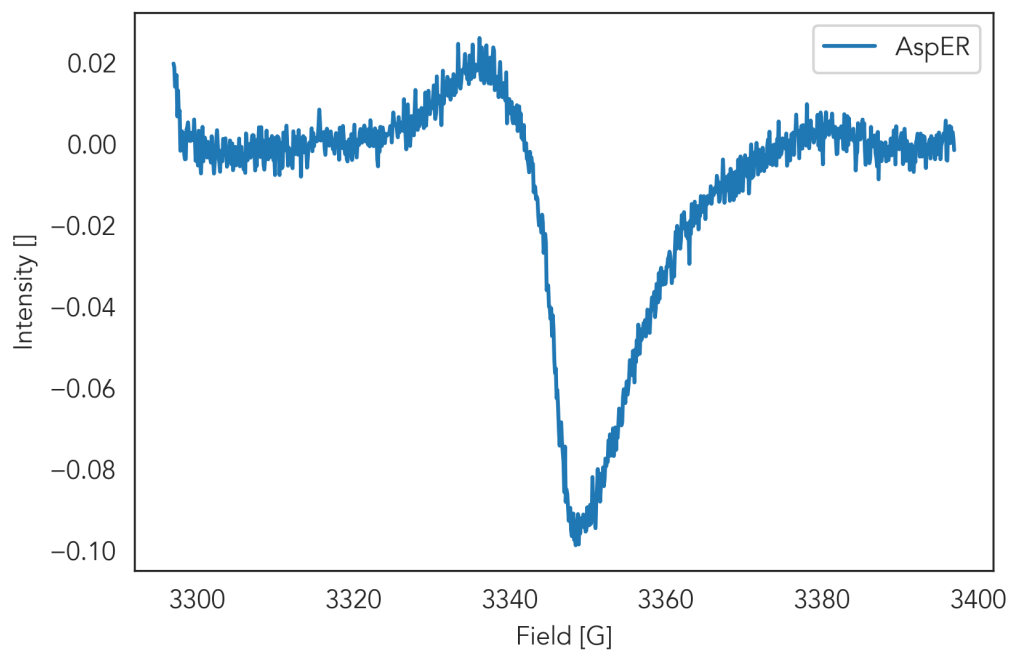

Supplemental Figure 40: EPR spectra of AspER semiquinone

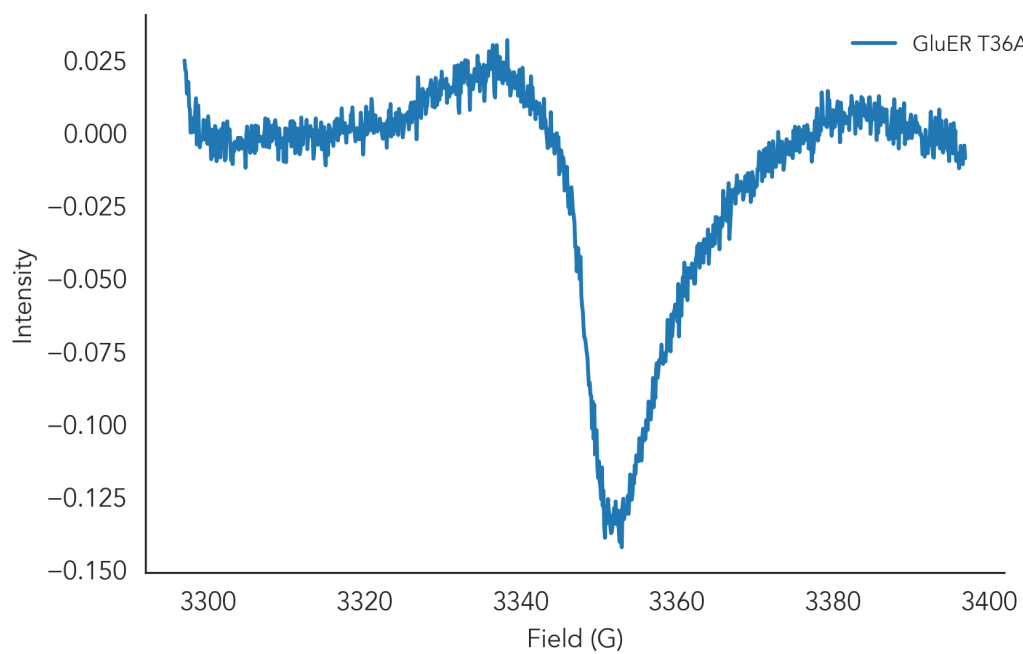

Supplemental Figure 41: EPR spectra of GluER T36A semiquinone

### Ground State Reactivity of the FMN<sub>hq</sub> in AspER

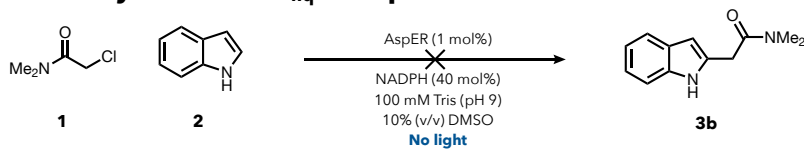

To determine if the ground state hydroquinone is the active species in AspER a reaction was set up using NADPH as the reductant in a mBraun glovebox with oxygen below 0.1 ppm. Reactions were run with 10  $\mu$ mol of chloroamide starting material at a final substrate concentration of 30 mM. A shell vial wrapped in tin foil to prevent any light irradiation was charged with a magnetic cross stir bar and a volume of 100 mM Tris pH 9 such that final concentration would be 30 mM after addition of all the other reagents. DMSO was added to the shell vial such that it would be 10% (v/v). Then 149  $\mu$ L of a 20 mg/mL solution of NADPH was added. Finally, 1 mol% of ERED was added. Neat chloroamide was then added to the shell vial, followed by indole (4.1 mg/10  $\mu$ L of DMSO). The vial was sealed with a rubber septa and brought out of the mBraun where it is placed on a stir plate at 300 rpm for 24 hours. After 24 hours, 1.75 mL of acetonitrile and 100  $\mu$ L of a 2m mg/mL solution of 1,3,5-tribromobenzene was added to the reaction vial and the solution was centrifuged at 16,800 xg for 10 minutes and filtered through a kimwipe plug for LCMS analysis. No alkylated indole product was detected.

## Dithionite Reactivity in AspER

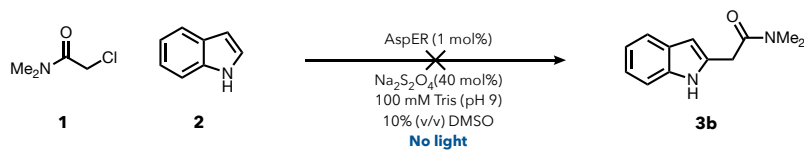

To determine if dithionite can catalyze the reaction by reducing the substrate in AspER's active site a reaction was set up using sodium dithionite as the reductant in a mBraun glovebox with oxygen below 0.1 ppm. Reactions were run with 20  $\mu$ mol of chloroamide starting material at a final substrate concentration of 30 mM. A shell vial wrapped in tin foil to prevent any light irradiation was charged with a magnetic cross stir bar and a volume of 100 mM Tris pH 9 such that final concentration would be 30 mM after addition of all the other reagents. THF was added to the shell vial such that it would be 10% (v/v). Then X  $\mu$ L of a 5 mg/mL solution of sodium dithionite was added. Finally, 1 mol% of ERED was added. Neat chloroamide was then added to the shell vial, followed by indole (8.2 mg/20  $\mu$ L of THF). The vial was sealed with a rubber septa and brought out of the mBraun where it is placed on a stir plate at 300 rpm for 24 hours. After 24 hours, the standard NMR analysis work up procedure was followed to see no yield of the alkylated product.

## Dithionite Titration and substrate addition

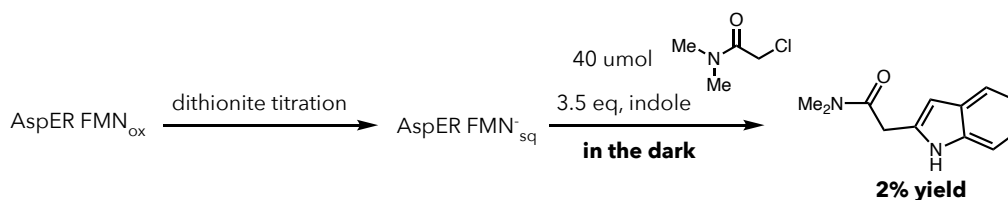

All samples were prepared in an MBraun glovebox with O<sub>2</sub> level less than 0.1 ppm. Cuvettes were specially designed with a GL18 cap to maintain oxygen free conditions for the duration of the experiment.

400 nmole of protein was added to 100 mM Tris buffer pH 9 such that the final volume was 1.2 mL. This solution was put into an anaerobic cuvette with a pathlength of 2 mm. The cuvette was sealed and a spectra was taken of the oxidized flavin. The cuvette was brought back into the mBraun and dithionite (5 mg/mL solution) was added carefully to generate the semiquinone. Qualitatively, semiquinone formation can be monitored through color change (reddish-brown for GluER T36A and orange-ish red for AspER). Semiquinone formation was measured using a UV-Vis. Typically 7-8  $\mu\text{L}$  was added. Once the protein was determined to be in mostly the semiquinone state, it was brought back into the mBraun and split into two shell vials wrapped in foil (600  $\mu\text{L}$  of the solution into each vial). 20  $\mu\text{mol}$  of chloroamide 1 and indole (8.2 mg/20  $\mu\text{L}$  DMSO) were added and a septa was placed. The solutions were allowed to sit in the dark for 48 hours. One vial was worked up using the standard NMR workup (workup 1) for the biocatalytic alkylation to reveal the C2 product was produced in 2% yield. The NMR mixture was then dried and subjected to LCMS analysis against the authentic standard to confirm the correct C2 product mass and retention time were observed. The same procedure was repeated with GluER T36A (Supplemental Figure 42) except only LCMS analysis was obtained to show the C2 product was now formed with the most product area [1.3 :1 C2:(C3+C4)] by integration. PagER cannot access the semiquinone using this method (Supplemental Figure 43).

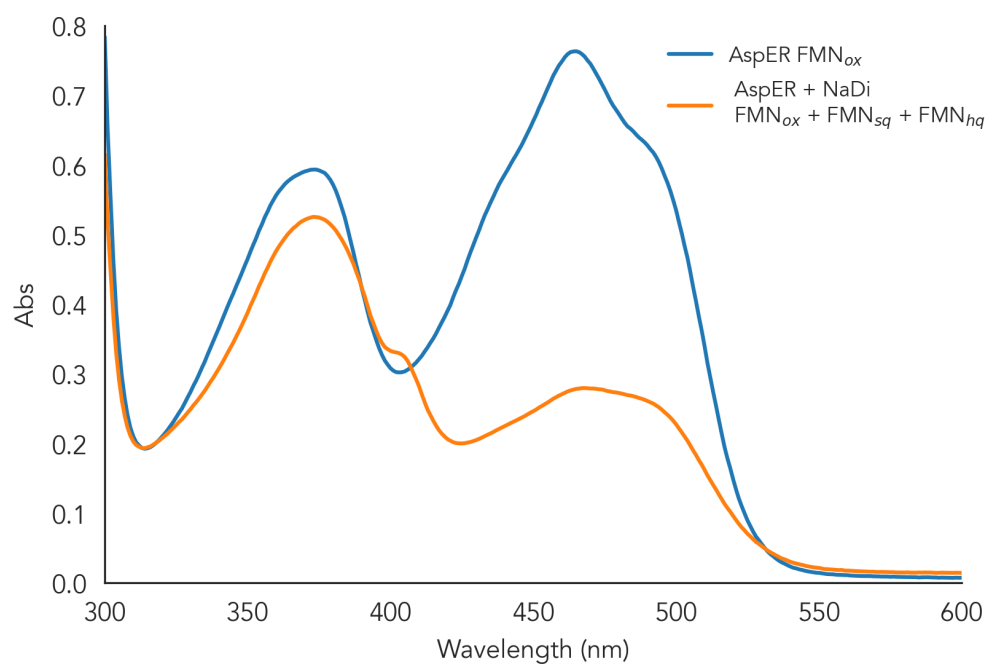

Supplemental Figure 42: Dithionite Titration for AspER

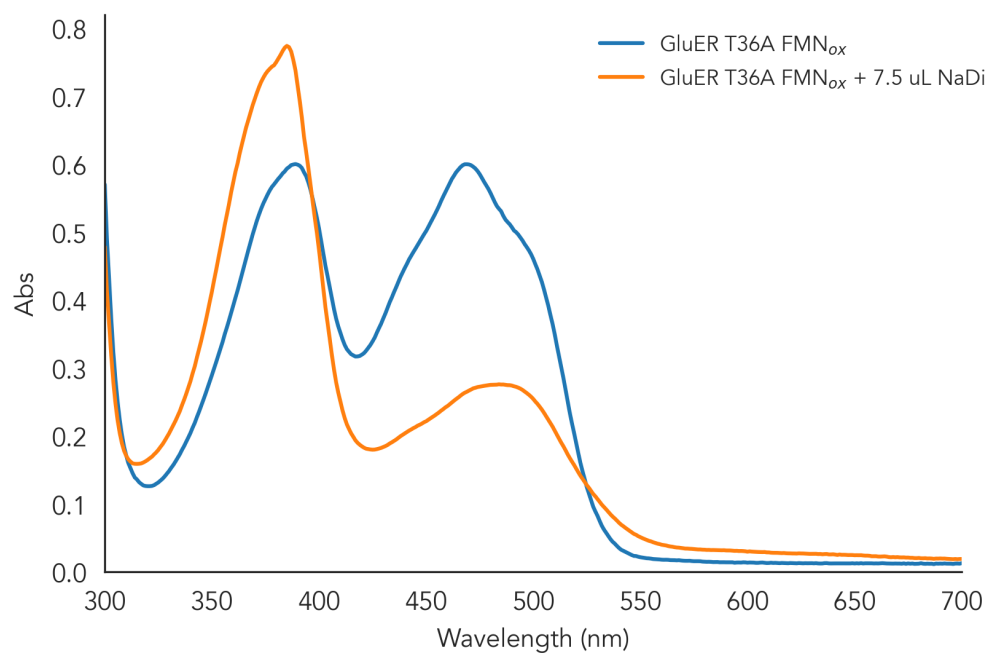

Supplemental Figure 43: Dithionite Titration for GluER T36A

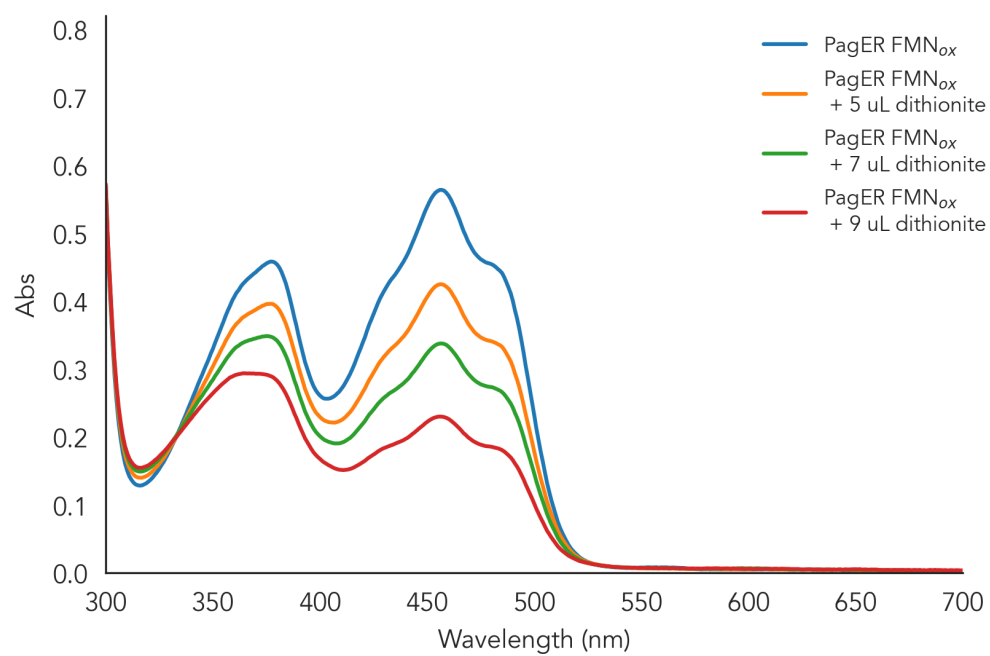

Supplemental Figure 44: Dithionite Titration for PagER

## Procedure to determine ground state reactivity of GluER T36A mutants

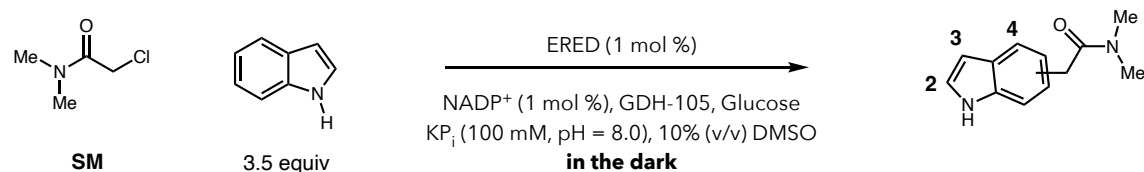

All reactions were set up in a Coy® Chamber. Reactions were run with 20  $\mu$ mol of chloroamide starting material at a final substrate concentration of 30 mM. A shell vial was wrapped in tin foil with a magnetic cross stir bar was charged with a "master mix" solution of 6 equivalents of (D)-glucose dissolved in 100 mM Tris pH 9 in a volume such that the final concentration of substrate would be 30 mM after addition of all the other reagents. *d*<sub>6</sub>-DMSO (deuterated DMSO allowed for simplified NMR analysis) was added to the shell vial such that the final concentration would be 10% (v/v). To this solution, 200  $\mu$ L of a 5 mg/mL GDH solution was added. Then 28  $\mu$ L for GluEr T36A and 140  $\mu$ L for all other mutants of a 5 mg/mL solution of NADP<sup>+</sup> was added. Finally, 1 mol% of ERED was added. Neat chloroamide was then added to the shell vial. Then indole was added as a stock solution in DMSO. The vial was immediately sealed with a rubber septa to prevent light from getting into solution once the substrates were added. It was then brought out of the Coy® Chamber where it is placed on a stir plate at 300 rpm in a dark room.

After 24 hours, 6.667  $\mu$ mol of internal standard ( 1,3,5-trimethoxybenzene) was added from a stock solution in ethyl acetate. Then an equal volume of ethyl acetate was added and the reactions were stirred for 30 minutes. They were centrifuged at 2000 x g for 2 minutes and organic layer removed. The extraction process was repeated 6 times. The organic layers were pooled and concentrated *in vacuo* and then resuspended in CDCl<sub>3</sub> and concentrated *in vacuo* again. The dried crude mixture was resuspended in CDCl<sub>3</sub> and analyzed by <sup>1</sup>H-NMR for yield calculation, where the singlet at  $\delta$  = 6.06 ppm corresponding to the three aromatic protons of 1,3,5-trimethoxybenzene was set to an integration of 1.00. Integration of varying signals of different product could be used to calculate an effective yield. The regioisomeric ratio was determined relative to the trimethoxybenzene standard.

**Supplemental Table 6: No light control with GluER T36A mutants**

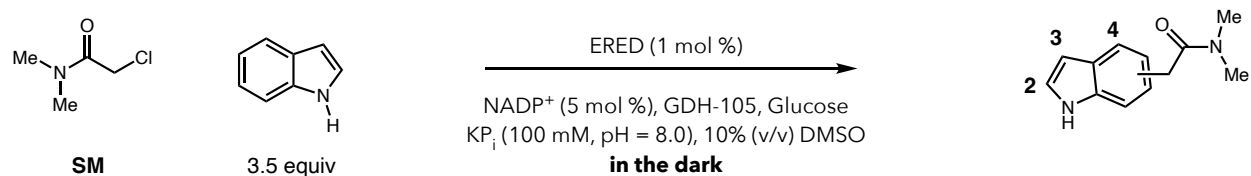

| ERED                    | SM % yield | C2 % yield | C3 % yield | C4 % yield |
|-------------------------|------------|------------|------------|------------|
| GluER T36A <sup>a</sup> | 85%        | n.d.       | n.d.       | n.d.       |
| + Y343F                 | 81%        | n.d.       | n.d.       | n.d.       |
| + T25L                  | 79%        | n.d.       | n.d.       | n.d.       |
| +T231V                  | 68%        | n.d.       | n.d.       | n.d.       |
| +G270M                  | 64%        | n.d.       | n.d.       | <1%        |
| +Q232W                  | 67%        | 2%         | n.d.       | 8%         |
| <b>[PagER]</b> +T268D   | 67%        | 2%         | n.d.       | 14%        |
| -T25L                   | 71%        | n.d.       | n.d.       | n.d.       |

Reaction conditions:  $\alpha$ -chloroamide ( 2 mg, 20  $\mu$ mol), 3.5 equiv. of arene ( 70  $\mu$ mol), 1 mol% ERED, 5 mol% NADP<sup>+</sup>, 1 mg GDH and 0.5 equiv of glucose (10  $\mu$ mol) was irradiated with Cyan LEDS for 24 hours. Yield of each regioisomer was determined by NMR using 1,3,5-trimethoxybenzene as standard. <sup>a</sup>The reaction was carried out with 1 mol% NADP<sup>+</sup>



### Procedure for estimating the redox potential in protein bound flavin

Using a modified procedure from Stewart et. al.<sup>62</sup> 50 nmole of protein was diluted to 100  $\mu$ mol in 100 mM  $\text{KPi}$  pH 8 and added to a quartz cuvette. A UV-Vis spectra was taken of oxidized flavin (all spectra are presented in Supplemental Figure 47). Then p-methoxyphenol was added from a 200 mM stock solution in ethanol such that final concentration would be 5 mM. Another UV-Vis spectra was taken of the CT state produced (all CT states are presented in Supplemental Figure 48). The wavelength of the local maxima of the CT state was identified and used to calculate the redox potential of the  $\text{FMN}_{\text{ox}}/\text{FMN}_{\text{sq}}$  ( $E_1$ ) redox couple and the midpoint potential ( $E_{\text{mid}}$ ), the average of the  $\text{FMN}_{\text{ox}}/\text{FMN}_{\text{sq}}$  and the  $\text{FMN}_{\text{sq}}/\text{FMN}_{\text{hq}}$  redox couples, using a linear relationship identified by Stewart et. al (Supplemental Figure 45 and 46). The midpoint and  $\text{FMN}_{\text{ox}}/\text{FMN}_{\text{sq}}$  for each step of the C4 indole evolutionary campaign are presented in Supplemental Figure 49 and 50 respectively.

From the midpoint potential and the  $E_1$  potential, we can conclude the potential of both the  $\text{FMN}_{\text{ox}}/\text{FMN}_{\text{sq}}$  and the  $\text{FMN}_{\text{sq}}/\text{FMN}_{\text{hq}}$  was lowered significantly to make a more reducing flavin hydroquinone and flavin semiquinone. We believe this has two benefits in the alkylation of indole. Massey observed lower  $\text{FMN}_{\text{ox}}/\text{FMN}_{\text{sq}}$  potentials corresponded with decreased semiquinone stability. PagER cannot be photoreduced at the same rate as GluER T36A, which means it has less access to the semiquinone. Attempts to generate the semiquinone with PagER using dithionite titration were also unsuccessful. By not accessing the semiquinone in solution, the C2 selective semiquinone pathway for alkylation cannot be accessed and less C2 product is formed. Additionally, lowering the  $\text{FMN}_{\text{hq}}$  reduction potential can be correlated to a decrease in the ionization potential of the  $\text{FMN}_{\text{hq}}$ . Lowering the ionization potential decreases the band gap of the CT state formed to do ground state electron transfer.

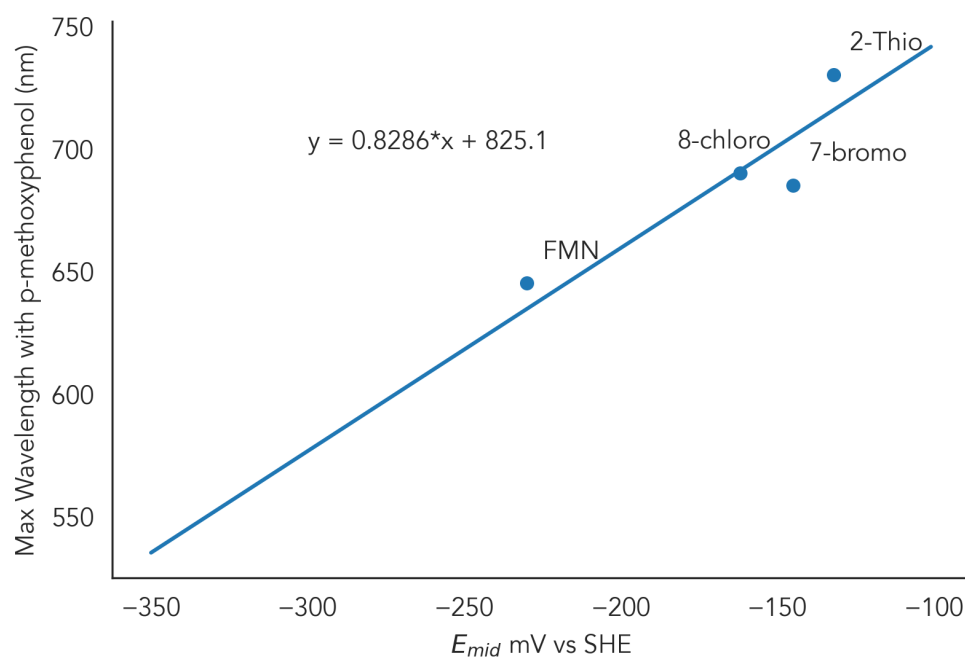

Supplemental Figure 45: Relationship between midpoint potential and  $\lambda_{maz}$  of the CT state between FMN<sub>ox</sub> and *p*-methoxyphenol

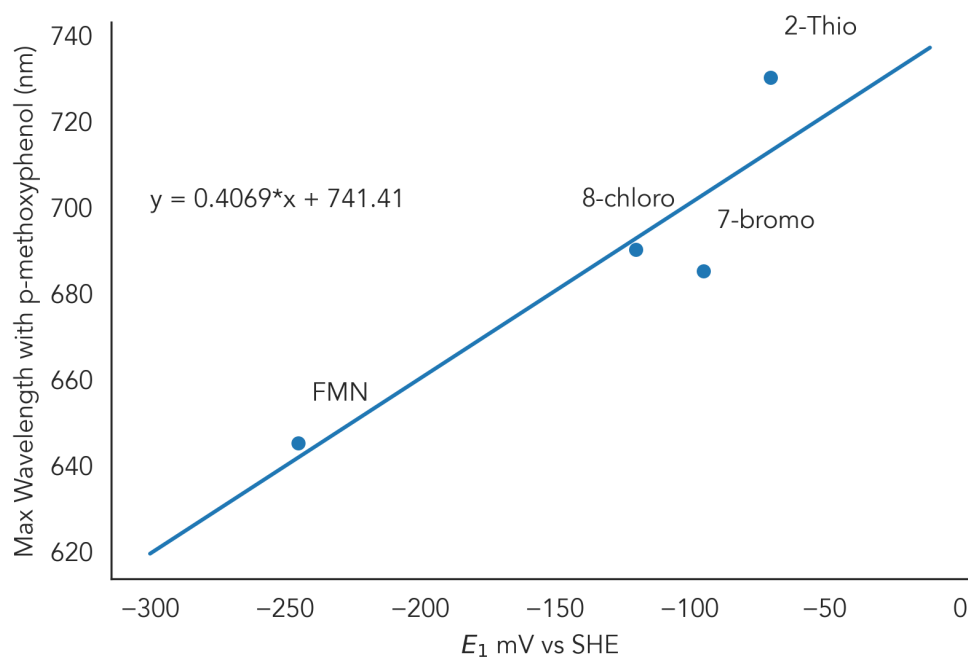

Supplemental Figure 46: Relationship between  $E_1$  and  $\lambda_{maz}$  of the CT state between  $FMN_{ox}$  and *p*-methoxyphenol

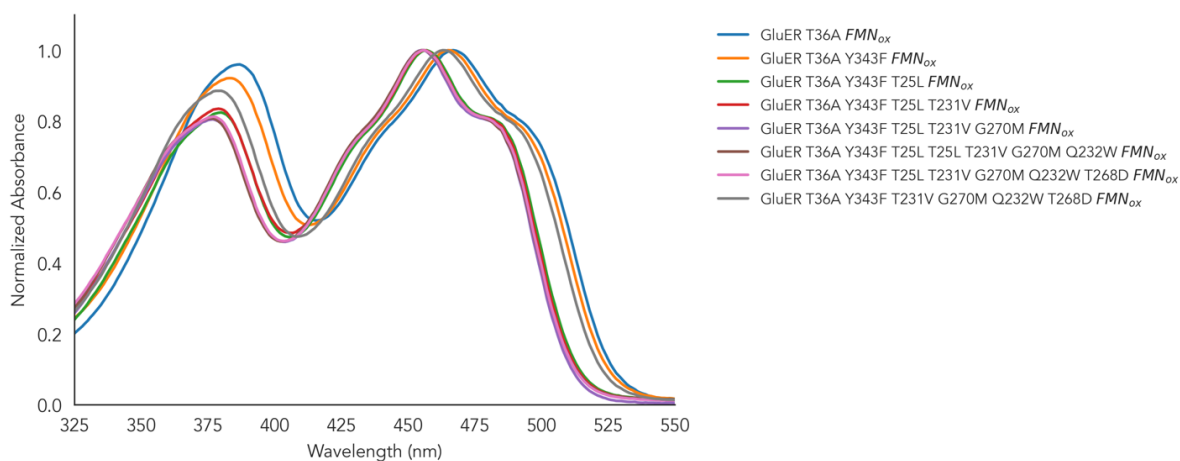

Supplemental Figure 47: Oxidized Flavin Traces

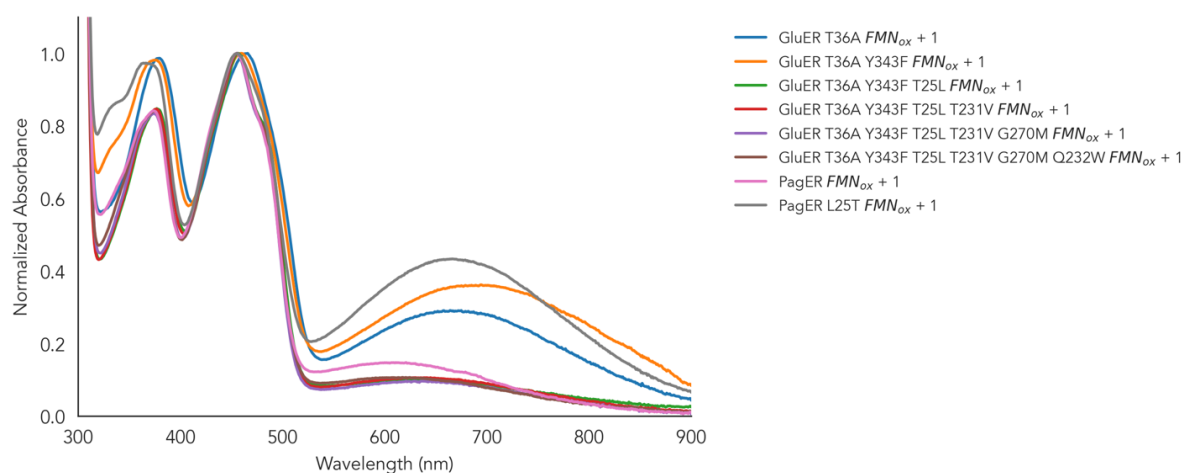

Supplemental Figure 48: CT state with  $FMN_{ox}$  and *p*-methoxyphenol

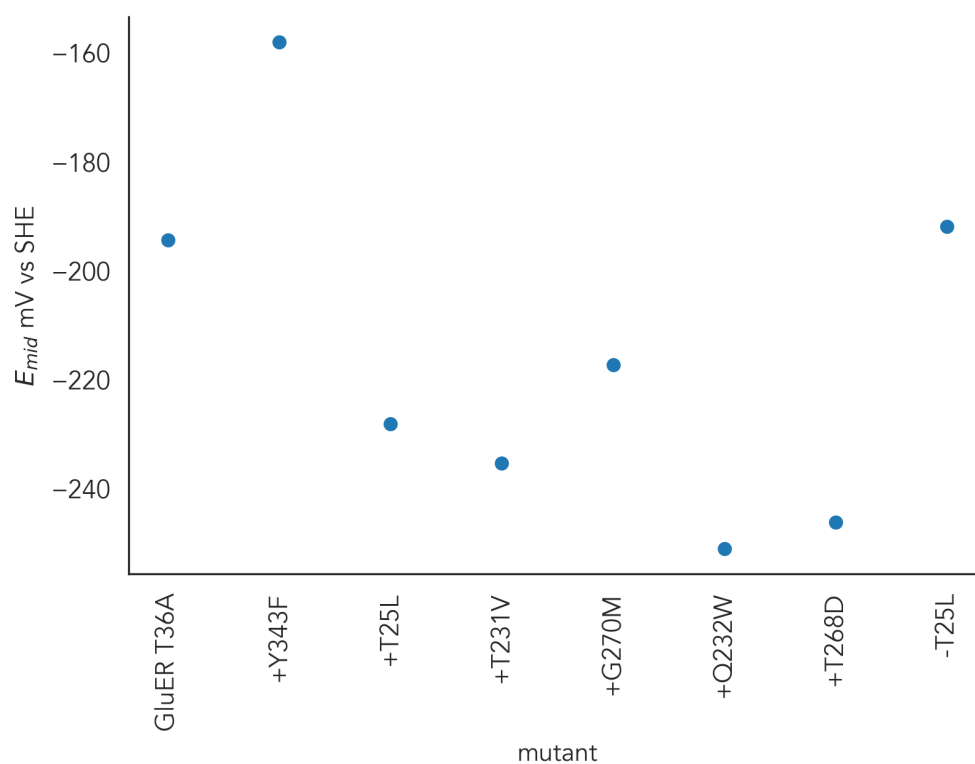

Supplemental Figure 49: Midpoint potential of mutants

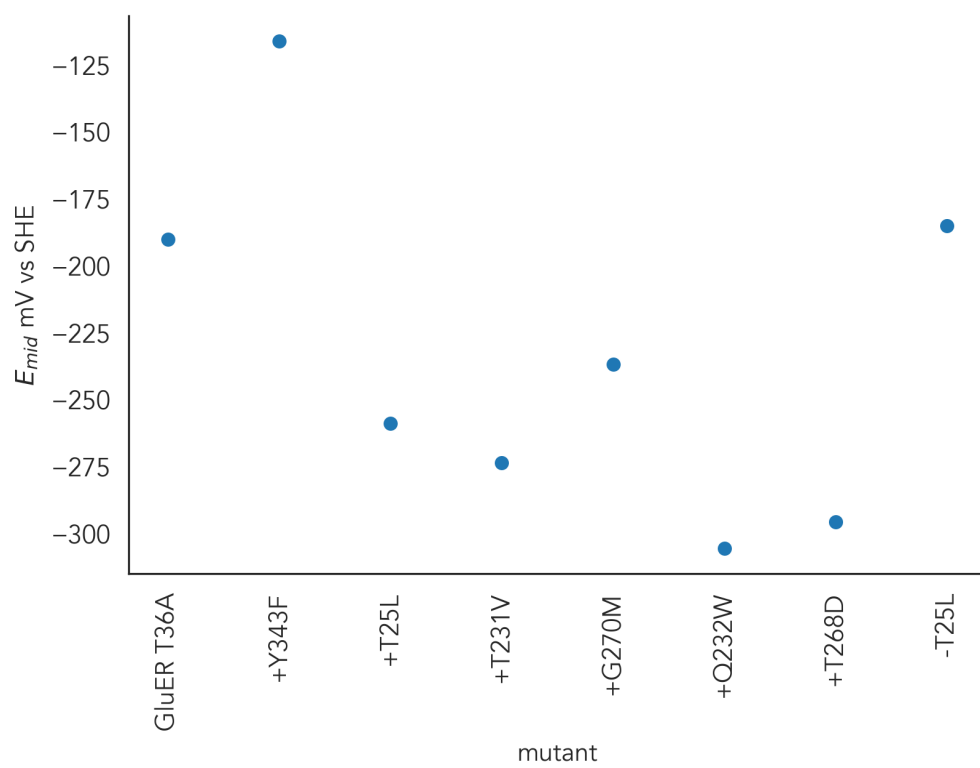

Supplemental Figure 50:  $E_1$  of all mutants

### **Photoreduction Time Course Procedure**

All samples were prepared in an MBraun glovebox with O<sub>2</sub> level less than 5 ppm. Cuvettes were specially designed with a GL18 cap to maintain oxygen free conditions for the duration of the experiment.

200 nmole of ERED was added to 1-2 mL of buffer (100 mM Tris pH 9) and added to the cuvette in the mBraun. The cuvette was sealed to the outside atmosphere and a spectrum was taken. The solution in the cuvette was then irradiated with cyan LEDs (50 W Chanzon high power LED chip,  $\lambda_{\text{max}} = 490 \text{ nm}$ , measured photon flux = 12,000 mM/m<sup>2</sup> s). A fan was used to maintain room temperature during the irradiation. At fixed time points, the cuvette was removed from the light and a spectrum was taken to monitor the process of photoreduction. The photoirradiation time courses for GluER T36A, PagER and AspER are shown in Supplemental Figures 51-53.

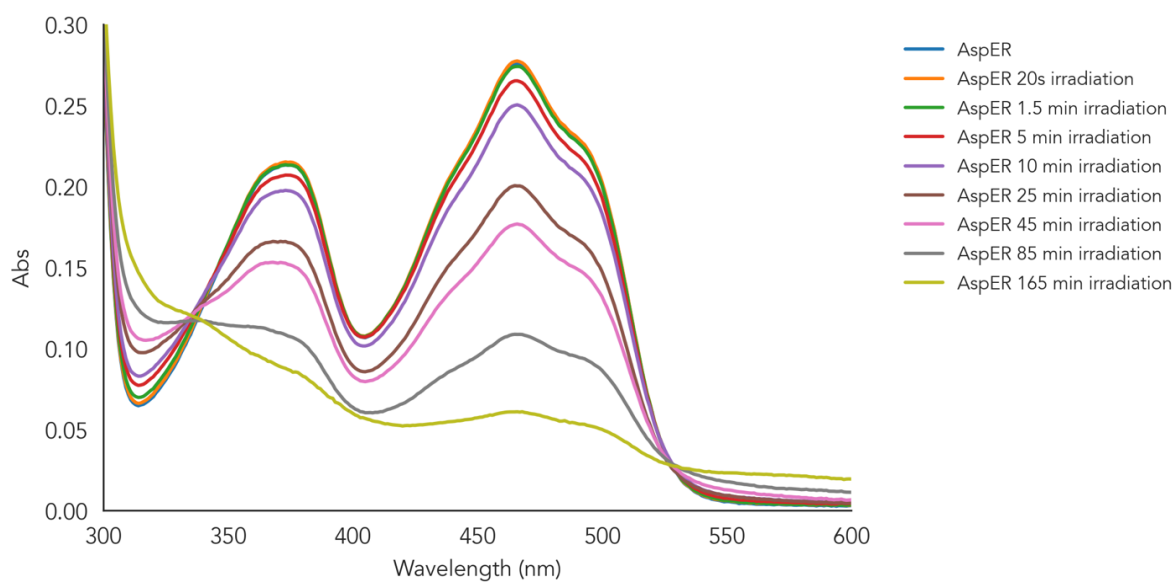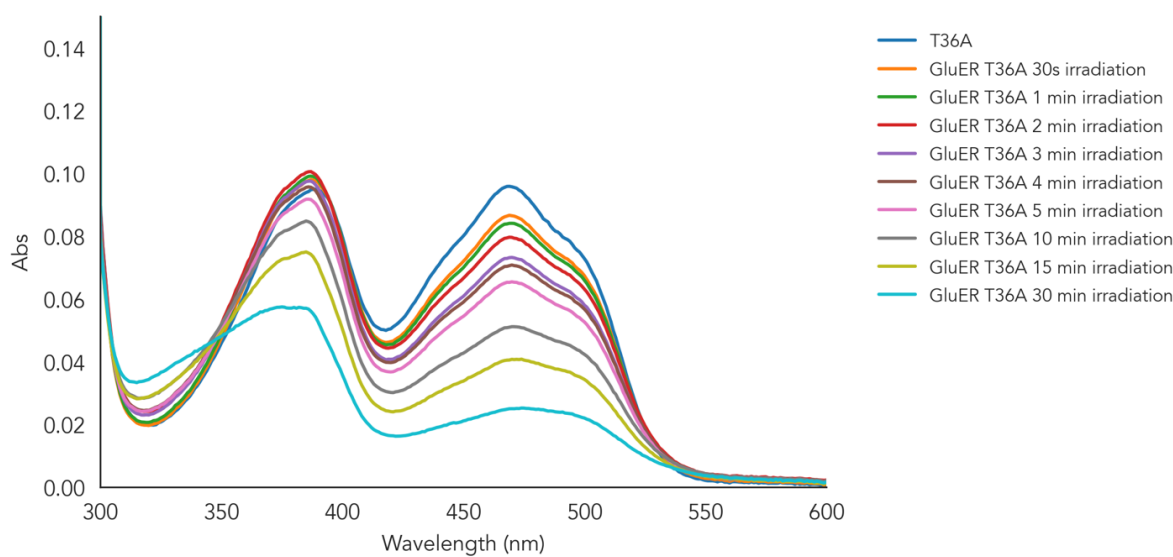

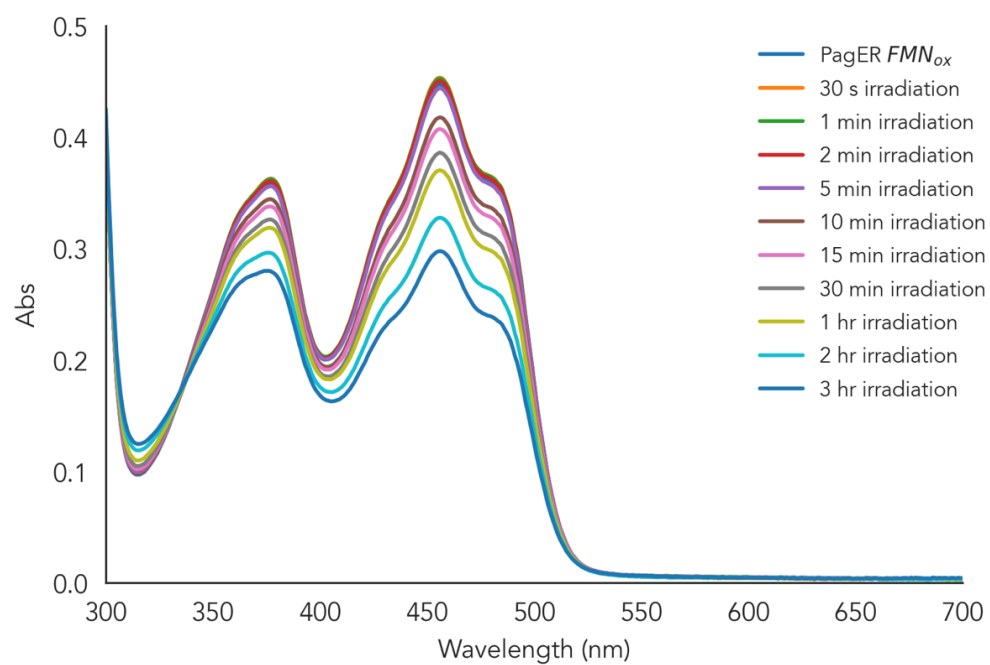

Supplemental Figure 53: PagER Photoreduction Time Course



## Procedure for the preparation of 4-D indole

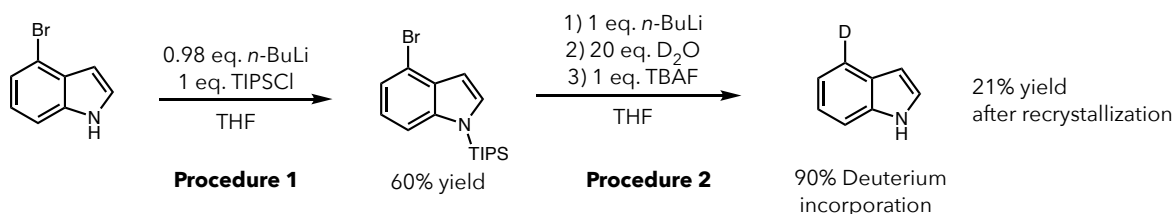

**Procedure 1:** Indole was added to a flame dried flask and stir bar and then dissolved in dry THF and placed under inert atmosphere. The flask was cooled to -78°C and *n*-BuLi (0.98 eq.) was added dropwise. The flask was stirred for 30 minutes and 1 equivalent of TIPSCl was added. The flask was allowed to come to room temperature while stirring and was then quenched with water and poured into a separatory funnel containing ether and water. The aqueous layer was extracted three times with ether. The organic layers were pooled and dried over sodium sulfate and then concentrated *in vacuo*. The crude residue was columned (20% Hexanes/Ethyl Acetate) and the fractions were collected and concentrated to yield pure N-TIPS-4-bromoindole as a white solid (60% yield).

**Procedure 2:** N-TIPS-4-bromoindole was added to a flame dried flask charged with a magnetic stir bar. Dry THF was added and the flask was placed under inert atmosphere and then cooled to -78°C. 1 equivalent of *n*-BuLi was added over several minutes. After complete addition, the flask was allowed to stir for 5 minutes before 20 equivalents of D<sub>2</sub>O were added. The flask was warmed to room temperature. The reaction mixture was diluted with more water and ether, separated and the aqueous layer was extracted three times with ether. The organic extracts were pooled, dried over sodium sulfate and then concentrated *in vacuo*. The crude residue was columned to yield a mixture of 4-bromoindole and 4-deuteroindole. 4-deuteroindole was recrystallized from this mixture using cold hexanes to yield pure 4-deuteroindole (21% yield, 90% deuterium incorporation). All spectra match reported values.

Kinetic Assay to determine KIE:

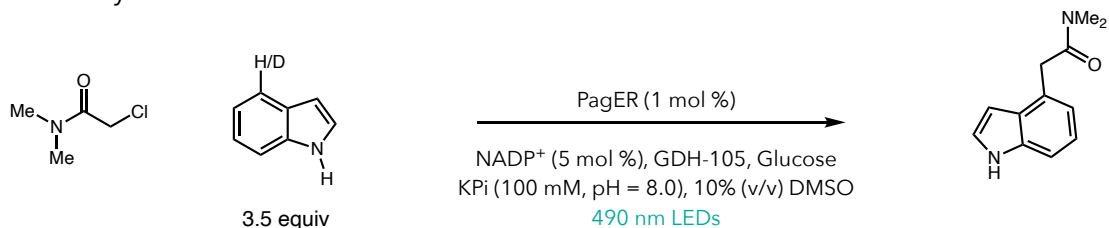

To determine if the oxidation of the indoyl radical is the rate determining step in PagER kinetic assays were conducted. All timepoints were taken in duplicate. Reactions were run in a Coy Chamber with 10  $\mu$ mol of chloroamide starting material at a final substrate concentration of 30 mM. Shell vials were charged with magnetic cross stir bars. A mastermix solution was added containing 0.5 equivalents of glucose, 1 mg of GDH, 5 mol% of NADP<sup>+</sup> and 1 mol% PagER in 300  $\mu$ L of 100 mM KPi pH 8. DMSO was added to the shell vial such that it would be 10% (v/v). Neat chloroamide was then added to the shell vial, followed by indole (4.1 mg/10  $\mu$ L of DMSO). The vials were sealed with a rubber septa and brought out of the Coy Chamber where it is placed on a stir plate at 300 rpm. At each timepoint, 1.75 mL of acetonitrile and 100  $\mu$ L of a 2m mg/mL solution of 1,3,5-tribromobenzene was added to the reaction vial and the solution was centrifuged at 16,800 xg for 10 minutes and filtered through a kimwipe plug for LCMS analysis. The standard curve to determine the amount of product form is below.

Standard Curve for 2-(1H-indol-4-yl)-N,N-dimethylacetamide

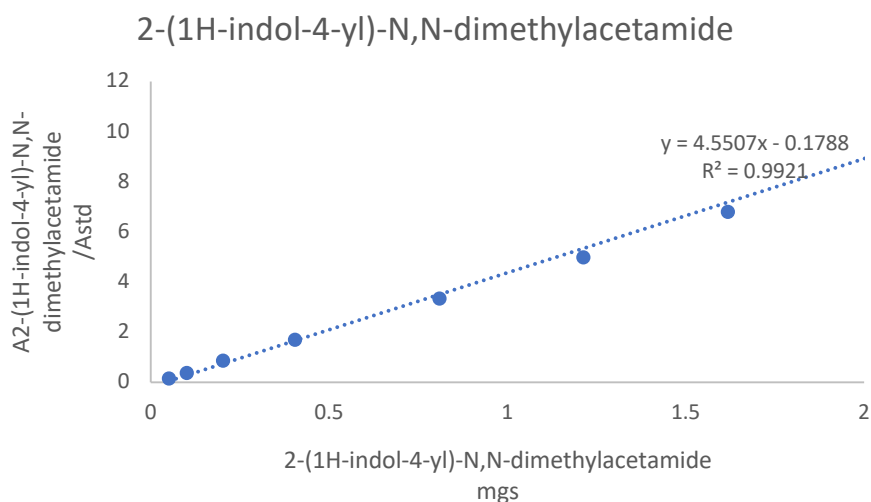

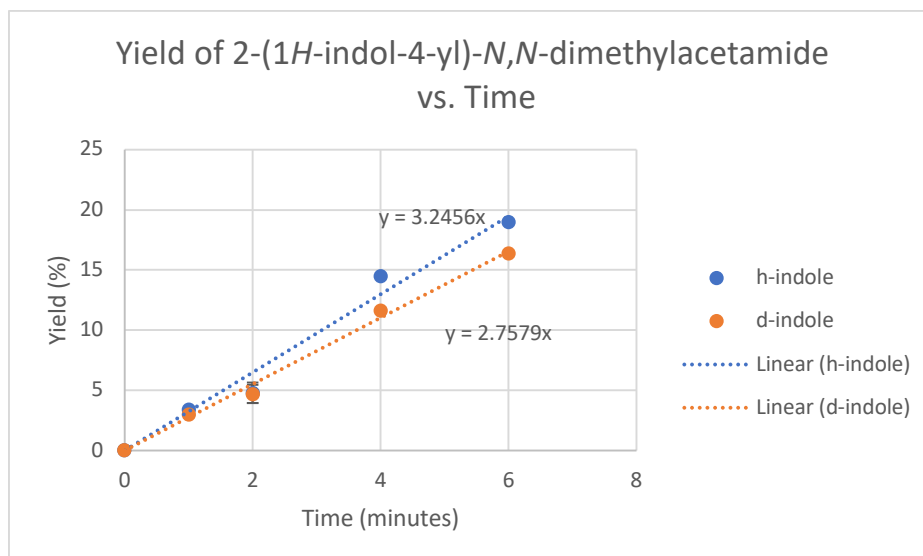

Supplemental Figure 54: Time Course for PagER using H/D-indole

### **Part XIII. Small Molecule and Protein Crystallography:**

PagER was expressed in BL21 pET22b *E. coli* cells and purified using a His-Trap HP 5mL affinity chromatography column (GE Life Sciences). The proteins were then subjected to buffer exchange and concentrated to a final concentration of 1.00 mM, approximately 40 mg/mL. Protein sample was then dialyzed into a 50 mM TEOA buffer before concentrating to a final concentration of 25 ug/uL. Initial crystallization screens for GluER were carried out using Crystal Screen 2 in hanging drop vapor-diffusion crystallization trays (Hampton Research) as well as with the help of the Hauptman-Woodward Institute.<sup>63</sup> Following optimization, a single crystal for PagER grew in 0.1 M Tris, 0.1 M Potassium Bromide, and 20-25% (w/v) PEG 4000 using sitting drop trays (Hampton Research). Initial crystal appeared after 7 days.

Diffraction data for T36A GluER was obtained at the ID7B2 (FlexX) beamline of CHESS using 0.9202 Å wavelength at 100 K to a maximum resolution of 0.9 Å. All data was integrated with the program DIALS and scaled with the program AIMLESS.<sup>64, 65</sup> Crystal data was analyzed for defects with program XTRIAGE and identified radiation damage, significant twinning (50% -h, -k, l) and low completeness in the 0.9-1.2 Å range. The dataset was then trimmed and scaled to 1.5 Å to account for radiation damage and resolution completeness; twinning was accounted for in subsequent refinement steps. The structure for PagER was determined by the method of molecular replacement using the PDB entry 6MYW (GluER T36A) and the program PHASER.<sup>66</sup> There were three molecules in the asymmetric unit of PagER. Electron density was clearly visible for most of the C-terminus (a.a. 316-356) with few exceptions that are otherwise supported by excellent fitting of adjacent, bonded atoms to the electron density map. Secondary and tertiary structure remained largely unchanged from GluER T36A with the exception of a few residues in and adjacent to the active site. Electron density for Flavin Mononucleotide (FMN) is also well supported by electron density in all NCS copies. COOT was used for model building, while structure refinement was carried out with Phenix, incorporating restrained anisotropic B-factor and occupancy refinement for protein and FMN co-factor atoms in the final stages.<sup>67, 68</sup> The final model for PagER has solid agreement with the data with an R-factor of 26% and an R-free of 27% for 8912 atoms. Ramachandran statistics for PagER show 97% (7921) of residues favored, 2% (370) allowed, and less than 1% (5) as outliers. The structure was uploaded to the Protein Databank under

\*Outliers are well supported by electron density and NCS constraints.

# Supplemental Table 7. Data collection and refinement statistics for PagER

|                                                     |                         |
|-----------------------------------------------------|-------------------------|
|                                                     | PagER<br>PDB: 8FW1      |
| <b>Data collection</b>                              |                         |
| Space group                                         | P1                      |
| Cell dimensions                                     |                         |
| <i>a</i> , <i>b</i> , <i>c</i> (Å)                  | 50.165, 51.849, 144.935 |
| $\alpha$ , $\beta$ , $\gamma$ (°)                   | 90.51, 90.11, 114.86    |
| Wavelength (Å)                                      | 0.9202                  |
| Resolution range (Å)                                | 72.46-1.50              |
| Total observations                                  | 504333                  |
| Total unique observations                           | 205104                  |
| <i>R</i> <sub>merge</sub>                           | 0.097 (0.309)           |
| <i>R</i> <sub>pim</sub>                             | 0.077 (0.239)           |
| <i>I</i> / $\sigma$ <i>I</i>                        | 7.9 (0.6)               |
| Completeness (%)                                    | 96.61 (93.80)           |
| Multiplicity                                        | 2.5 (2.3)               |
| <b>Refinement</b>                                   |                         |
| Resolution range (Å)                                | 45.51-1.50              |
| Reflections (total)                                 | 203975                  |
| Reflections (test)                                  | 2021                    |
| <i>R</i> <sub>work</sub> / <i>R</i> <sub>free</sub> | 0.2675/0.2728           |
| No. atoms                                           | 8912                    |
| Protein                                             | 8355                    |
| Ligand/ion                                          | 90                      |
| Water                                               | 467                     |
| <i>B</i> -Factors                                   | 16.16                   |
| R.M.S.-Deviations                                   |                         |
| Bonds(Å)                                            | 0.03                    |
| Angles(°)                                           | 0.76                    |
| Ramachandran Statistics                             |                         |
| Favored (%)                                         | 94.81                   |
| Allowed (%)                                         | 4.44                    |
| Outliers (%)                                        | 0.74                    |
| Rotamer Outliers (%)                                | 2.45                    |
| Clashscore                                          | 29                      |

\* Numbers in parentheses represent values for highest resolution shell

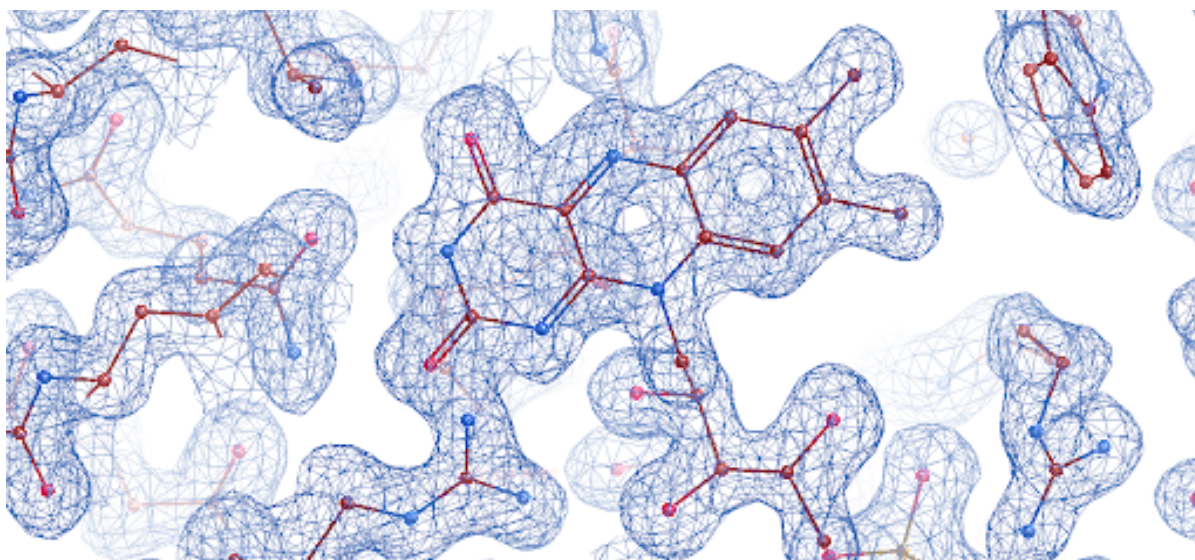

Supplemental Figure 55. Electron density map (2Fo-Fc) for PagER. The quality of the maps is high with FMN location well supported by electron density.

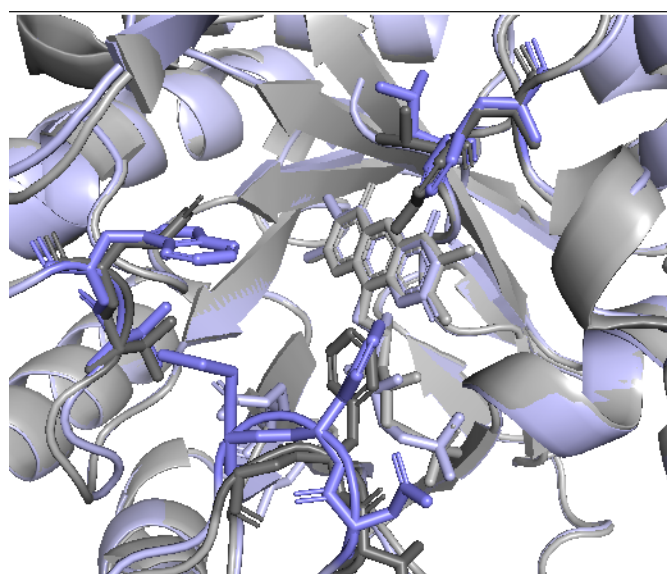

Supplemental Figure 56. Overlay of PagER (blue) and GluER T36A (grey).

### Small Molecule X-Ray Crystallographic Data

Low-temperature X-ray diffraction data for **Rjic1**, **Rjic2** and **Rjic3** were collected on a Rigaku XtaLAB Synergy diffractometer coupled to a Rigaku HyPix detector with Cu K $\alpha$  radiation ( $\lambda = 1.54184 \text{ \AA}$ ), from a PhotonJet micro-focus X-ray source at 100 K. The diffraction images were processed and scaled using the CrysAlisPro software.<sup>69</sup> The structures were solved through intrinsic phasing using SHELXT<sup>70</sup> and refined against  $F^2$  on all data by full-matrix least squares with SHELXL<sup>71</sup> following established refinement strategies.<sup>72</sup> All non-hydrogen atoms were refined anisotropically. All hydrogen atoms bound to carbon were included in the model at geometrically calculated positions and refined using a riding model. Hydrogen atoms bound to nitrogen were located in the difference Fourier synthesis and subsequently refined semi-freely with the help of distance restraints. The isotropic displacement parameters of all hydrogen atoms were fixed to 1.2 times the Ueq value of the atoms they are linked to (1.5 times for methyl groups). Details of the data quality and a summary of the residual values of the refinements are listed in Tables 8-10.

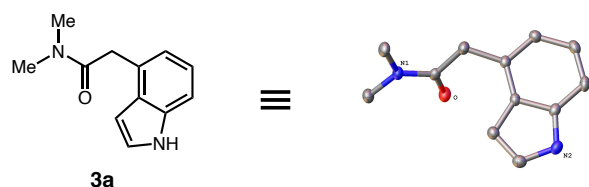

CCDC 2237629

**Supplementary Table 8. Crystal data and structure refinement for compound 3a.**

|                                    |                                                                                                                                                                                                                                   |
|------------------------------------|-----------------------------------------------------------------------------------------------------------------------------------------------------------------------------------------------------------------------------------|
| Identification code                | rjic3_abs                                                                                                                                                                                                                         |
| Crystal data                       |                                                                                                                                                                                                                                   |
| Chemical formula                   | C <sub>12</sub> H <sub>14</sub> N <sub>2</sub> O                                                                                                                                                                                  |
| <i>M<sub>r</sub></i>               | 202.25                                                                                                                                                                                                                            |
| Crystal system, space group        | Monoclinic, <i>P</i> 2 <sub>1</sub>                                                                                                                                                                                               |
| Temperature (K)                    | 102                                                                                                                                                                                                                               |
| <i>a</i> , <i>b</i> , <i>c</i> (Å) | 7.1001 (1), 8.5854 (2), 8.5676 (2)                                                                                                                                                                                                |
| <i>b</i> (°)                       | 96.381 (2)                                                                                                                                                                                                                        |
| <i>V</i> (Å <sup>3</sup> )         | 519.02 (2)                                                                                                                                                                                                                        |
| <i>Z</i>                           | 2                                                                                                                                                                                                                                 |
| Radiation type                     | Cu Kα                                                                                                                                                                                                                             |
| <i>m</i> (mm <sup>-1</sup> )       | 0.67                                                                                                                                                                                                                              |
| Crystal size (mm)                  | 0.19 × 0.04 × 0.04                                                                                                                                                                                                                |
|                                    |                                                                                                                                                                                                                                   |
| Data collection                    |                                                                                                                                                                                                                                   |
| Diffractometer                     | XtaLAB Synergy, Dualflex, HyPix                                                                                                                                                                                                   |
| Absorption correction              | Gaussian <i>CrysAlis PRO</i> 1.171.42.58a (Rigaku Oxford Diffraction, 2022)<br>Numerical absorption correction based on gaussian integration over a multifaceted crystal model<br>Empirical absorption correction using spherical |



|                                                                       |                                                                                                                               |
|-----------------------------------------------------------------------|-------------------------------------------------------------------------------------------------------------------------------|
|                                                                       | harmonics, implemented in SCALE3 ABSPACK scaling algorithm.                                                                   |
| $T_{\min}, T_{\max}$                                                  | 0.798, 1.000                                                                                                                  |
| No. of measured, independent and observed [ $I > 2s(I)$ ] reflections | 10537, 2103, 2029                                                                                                             |
| $R_{\text{int}}$                                                      | 0.051                                                                                                                         |
| $(\sin \theta/\lambda)_{\max} (\text{\AA}^{-1})$                      | 0.634                                                                                                                         |
|                                                                       |                                                                                                                               |
| Refinement                                                            |                                                                                                                               |
| $R[F^2 > 2s(F^2)], wR(F^2), S$                                        | 0.034, 0.090, 1.08                                                                                                            |
| No. of reflections                                                    | 2103                                                                                                                          |
| No. of parameters                                                     | 141                                                                                                                           |
| No. of restraints                                                     | 2                                                                                                                             |
| H-atom treatment                                                      | H atoms treated by a mixture of independent and constrained refinement                                                        |
| $D\rho_{\max}, D\rho_{\min} (\text{e \AA}^{-3})$                      | 0.15, -0.18                                                                                                                   |
| Absolute structure                                                    | Flack x determined using 855 quotients $[(I+)-(I-)]/[(I+)+(I-)]$ (Parsons, Flack and Wagner, Acta Cryst. B69 (2013) 249-259). |
| Absolute structure parameter                                          | -0.01 (15)                                                                                                                    |

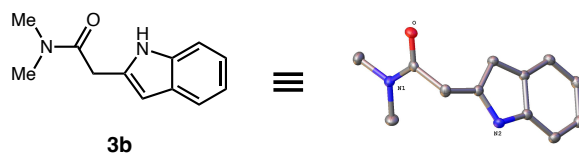

CCDC 2237628

**Supplementary Table 9. Crystal data and structure refinement for compound 3b.**

|                                                                                             |                                                                                                                                                                                                                                                                                         |
|---------------------------------------------------------------------------------------------|-----------------------------------------------------------------------------------------------------------------------------------------------------------------------------------------------------------------------------------------------------------------------------------------|
| Identification code                                                                         | rjic2_abs                                                                                                                                                                                                                                                                               |
| Crystal data                                                                                |                                                                                                                                                                                                                                                                                         |
| Chemical formula                                                                            | C <sub>12</sub> H <sub>14</sub> N <sub>2</sub> O                                                                                                                                                                                                                                        |
| <i>M<sub>r</sub></i>                                                                        | 202.25                                                                                                                                                                                                                                                                                  |
| Crystal system, space group                                                                 | Orthorhombic, <i>Pbca</i>                                                                                                                                                                                                                                                               |
| Temperature (K)                                                                             | 102                                                                                                                                                                                                                                                                                     |
| <i>a</i> , <i>b</i> , <i>c</i> (Å)                                                          | 12.7799 (2), 11.8103 (2), 13.7400 (2)                                                                                                                                                                                                                                                   |
| <i>V</i> (Å <sup>3</sup> )                                                                  | 2073.84 (6)                                                                                                                                                                                                                                                                             |
| <i>Z</i>                                                                                    | 8                                                                                                                                                                                                                                                                                       |
| Radiation type                                                                              | Cu Kα                                                                                                                                                                                                                                                                                   |
| <i>m</i> (mm <sup>-1</sup> )                                                                | 0.67                                                                                                                                                                                                                                                                                    |
| Crystal size (mm)                                                                           | 0.08 × 0.04 × 0.04                                                                                                                                                                                                                                                                      |
|                                                                                             |                                                                                                                                                                                                                                                                                         |
| Data collection                                                                             |                                                                                                                                                                                                                                                                                         |
| Diffractometer                                                                              | XtaLAB Synergy, Dualflex, HyPix                                                                                                                                                                                                                                                         |
| Absorption correction                                                                       | Gaussian <i>CrysAlis PRO</i> 1.171.42.58a (Rigaku Oxford Diffraction, 2022) Numerical absorption correction based on gaussian integration over a multifaceted crystal model Empirical absorption correction using spherical harmonics, implemented in SCALE3 ABSPACK scaling algorithm. |
| <i>T<sub>min</sub></i> , <i>T<sub>max</sub></i>                                             | 0.887, 1.000                                                                                                                                                                                                                                                                            |
| No. of measured, independent and observed [ <i>I</i> > 2 <i>s</i> ( <i>I</i> )] reflections | 12433, 2209, 2015                                                                                                                                                                                                                                                                       |

|                                                              |                                                                        |
|--------------------------------------------------------------|------------------------------------------------------------------------|
| $R_{\text{int}}$                                             | 0.035                                                                  |
| $(\sin \theta/\lambda)_{\text{max}} (\text{\AA}^{-1})$       | 0.634                                                                  |
|                                                              |                                                                        |
| Refinement                                                   |                                                                        |
| $R[F^2 > 2s(F^2)], wR(F^2), S$                               | 0.037, 0.097, 1.06                                                     |
| No. of reflections                                           | 2209                                                                   |
| No. of parameters                                            | 141                                                                    |
| No. of restraints                                            | 1                                                                      |
| H-atom treatment                                             | H atoms treated by a mixture of independent and constrained refinement |
| $D\rho_{\text{max}}, D\rho_{\text{min}} (\text{e \AA}^{-3})$ | 0.26, -0.21                                                            |

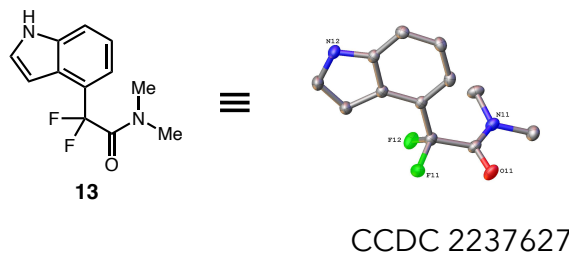

**Supplementary Table 10. Crystal data and structure refinement for compound 13.**

|                                    |                                                                                                                                                                                                                                   |
|------------------------------------|-----------------------------------------------------------------------------------------------------------------------------------------------------------------------------------------------------------------------------------|
| Identification code                | rjic1_abs                                                                                                                                                                                                                         |
| Crystal data                       |                                                                                                                                                                                                                                   |
| Chemical formula                   | C <sub>12</sub> H <sub>12</sub> F <sub>2</sub> N <sub>2</sub> O                                                                                                                                                                   |
| <i>M<sub>r</sub></i>               | 238.24                                                                                                                                                                                                                            |
| Crystal system, space group        | Monoclinic, <i>P</i> 2 <sub>1</sub> / <i>c</i>                                                                                                                                                                                    |
| Temperature (K)                    | 101                                                                                                                                                                                                                               |
| <i>a</i> , <i>b</i> , <i>c</i> (Å) | 13.3477 (1), 13.5372 (1), 13.7530 (1)                                                                                                                                                                                             |
| <i>b</i> (°)                       | 111.309 (1)                                                                                                                                                                                                                       |
| <i>V</i> (Å <sup>3</sup> )         | 2315.14 (3)                                                                                                                                                                                                                       |
| <i>Z</i>                           | 8                                                                                                                                                                                                                                 |
| Radiation type                     | Cu <i>K</i> α                                                                                                                                                                                                                     |
| <i>m</i> (mm <sup>-1</sup> )       | 0.94                                                                                                                                                                                                                              |
| Crystal size (mm)                  | 0.13 × 0.1 × 0.08                                                                                                                                                                                                                 |
| Data collection                    |                                                                                                                                                                                                                                   |
| Diffractometer                     | XtaLAB Synergy, Dualflex, HyPix                                                                                                                                                                                                   |
| Absorption correction              | Gaussian <i>CrysAlis PRO</i> 1.171.42.58a (Rigaku Oxford Diffraction, 2022)<br>Numerical absorption correction based on gaussian integration over a multifaceted crystal model<br>Empirical absorption correction using spherical |

|                                                                       |                                                                        |
|-----------------------------------------------------------------------|------------------------------------------------------------------------|
|                                                                       | harmonics, implemented in SCALE3 ABSPACK scaling algorithm.            |
| $T_{\min}, T_{\max}$                                                  | 0.696, 1.000                                                           |
| No. of measured, independent and observed [ $I > 2s(I)$ ] reflections | 27663, 4937, 4509                                                      |
| $R_{\text{int}}$                                                      | 0.034                                                                  |
| $(\sin \theta/\lambda)_{\max} (\text{\AA}^{-1})$                      | 0.635                                                                  |
| Refinement                                                            |                                                                        |
| $R[F^2 > 2s(F^2)], wR(F^2), S$                                        | 0.036, 0.096, 1.06                                                     |
| No. of reflections                                                    | 4937                                                                   |
| No. of parameters                                                     | 317                                                                    |
| No. of restraints                                                     | 2                                                                      |
| H-atom treatment                                                      | H atoms treated by a mixture of independent and constrained refinement |
| $D\rho_{\max}, D\rho_{\min} (\text{e \AA}^{-3})$                      | 0.32, -0.24                                                            |

#### Part XIV. References:

- (43) Gibson, D. G.; Young, L.; Chuang, R.-Y.; Venter, J. C.; Hutchison, C. A.; Smith, H. O. Enzymatic assembly of DNA molecules up to several hundred kilobases. *Nature Methods* **2009**, 6 (5), 343-345. DOI: 10.1038/nmeth.1318.
- (44) Sandoval, B. A.; Meichan, A. J.; Hyster, T. K. Enantioselective Hydrogen Atom Transfer: Discovery of Catalytic Promiscuity in Flavin-Dependent 'Ene'-Reductases. *Journal of the American Chemical Society* **2017**, 139 (33), 11313-11316. DOI: 10.1021/jacs.7b05468.
- (45) Aliverti, A.; Curti, B.; Vanoni, M. A. Identifying and quantitating FAD and FMN in simple and in iron-sulfur-containing flavoproteins. In *Flavoprotein protocols*, Springer, 1999; pp 9-23.
- (46) O'Brien, C. J.; Droege, D. G.; Jiu, A. Y.; Gandhi, S. S.; Paras, N. A.; Olson, S. H.; Conrad, J. Photoredox Cyanomethylation of Indoles: Catalyst Modification and Mechanism. *The Journal of Organic Chemistry* **2018**, 83 (16), 8926-8935. DOI: 10.1021/acs.joc.8b01146.
- (47) Kille, S.; Acevedo-Rocha, C. G.; Parra, L. P.; Zhang, Z.-G.; Opperman, D. J.; Reetz, M. T.; Acevedo, J. P. Reducing Codon Redundancy and Screening Effort of Combinatorial Protein Libraries Created by Saturation Mutagenesis. *ACS Synthetic Biology* **2013**, 2 (2), 83-92. DOI: 10.1021/sb300037w.
- (48) Nicholls, B. T.; Oblinsky, D. G.; Kurtoic, S. I.; Grosheva, D.; Ye, Y.; Scholes, G. D.; Hyster, T. K. Engineering a Non-Natural Photoenzyme for Improved Photon Efficiency\*\*. *Angewandte Chemie International Edition* **2022**, 61 (2), e202113842, <https://doi.org/10.1002/anie.202113842>. DOI: <https://doi.org/10.1002/anie.202113842> (accessed 2022/10/30).
- (49) Page, C. G.; Cooper, S. J.; DeHovitz, J. S.; Oblinsky, D. G.; Biegasiewicz, K. F.; Antropow, A. H.; Armbrust, K. W.; Ellis, J. M.; Hamann, L. G.; Horn, E. J.; et al. Quaternary Charge-Transfer Complex Enables Photoenzymatic Intermolecular Hydroalkylation of Olefins. *Journal of the American Chemical Society* **2020**, 143 (1), 97-102. DOI: 10.1021/jacs.0c11462 PMID - 33369395.
- (50) DESROY, N.; HECKMANN, B.; BRYSS, R. C. X.; JONCOUR, A.; PEIXOTO, C.; BOCK, X. COMPOUNDS AND PHARMACEUTICAL COMPOSITIONS THEREOF FOR THE TREATMENT OF INFLAMMATORY DISORDERS. France 2014.
- (51) Kawasaki, T.; Ohtsuka, H.; Mihira, A.; Sakamoto, M. Synthesis of 4-(2-aminoethyl) indoles through claisen ortho-amide rearrangement of 3-hydroxy-2-methoxyindolines. *Heterocycles* **1998**, 1 (47), 367-373.
- (52) Hlasta, D. J.; Luttinger, D.; Perrone, M. H.; Silbernagel, M. J.; Ward, S. J.; Haubrich, D. R. .alpha.2-Adrenergic agonists/antagonists: the synthesis and structure-activity relationships of a series of indolin-2-yl and tetrahydroquinolin-2-yl imidazolines. *Journal of Medicinal Chemistry* **1987**, 30 (9), 1555-1562. DOI: 10.1021/jm00392a005.
- (53) Bennasar, M. L.; Alvarez, M.; Lavilla, R.; Zulaica, E.; Bosch, J. General method for the synthesis of bridged indole alkaloids. Nucleophilic addition of indoleacetic ester enolates to N-alkylpyridinium salts. *The Journal of Organic Chemistry* **1990**, 55 (4), 1156-1168. DOI: 10.1021/jo00291a013.
- (54) Canoira, L.; Rodriguez, J. G. Synthesis of oxindole derivatives from N-alkenyl-o-chloroanilides with zero-valent nickel complex. *Journal of Heterocyclic Chemistry* **1985**, 22 (6), 1511-1518. DOI: <https://doi.org/10.1002/jhet.5570220609>.

- (55) Nizamov, S.; Willig, K. I.; Sednev, M. V.; Belov, V. N.; Hell, S. W. Phosphorylated 3-Heteroaryl coumarins and Their Use in Fluorescence Microscopy and Nanoscopy. *Chemistry – A European Journal* **2012**, *18* (51), 16339-16348, <https://doi.org/10.1002/chem.201202382>. DOI: <https://doi.org/10.1002/chem.201202382> (accessed 2023/01/18).
- (56) Cannon, J. G.; Demopoulos, B. J. Synthesis of N-alkyl derivatives of 4-(2'-aminoethyl)indole. *Journal of Heterocyclic Chemistry* **1982**, *19* (5), 1195-1199, <https://doi.org/10.1002/jhet.5570190541>. DOI: <https://doi.org/10.1002/jhet.5570190541> (accessed 2023/01/13).
- (57) Shao, H.; Liang, P. Method for preparing ropinirole hydrochloride. China 2018.
- (58) Griffin, J. D.; Zeller, M. A.; Nicewicz, D. A. Hydrodecarboxylation of Carboxylic and Malonic Acid Derivatives via Organic Photoredox Catalysis: Substrate Scope and Mechanistic Insight. *Journal of the American Chemical Society* **2015**, *137* (35), 11340-11348. DOI: 10.1021/jacs.5b07770.
- (59) He, K.-H.; Tan, F.-F.; Zhou, C.-Z.; Zhou, G.-J.; Yang, X.-L.; Li, Y. Acceptorless Dehydrogenation of N-Heterocycles by Merging Visible-Light Photoredox Catalysis and Cobalt Catalysis. *Angewandte Chemie International Edition* **2017**, *56* (11), 3080-3084, <https://doi.org/10.1002/anie.201612486>. DOI: <https://doi.org/10.1002/anie.201612486> (accessed 2023/01/13).
- (60) Xu, D.; Kohli, R. M.; Massey, V. The role of threonine 37 in flavin reactivity of the old yellow enzyme. *Proceedings of the National Academy of Sciences* **1999**, *96* (7), 3556-3561. DOI: 10.1073/pnas.96.7.3556.
- (61) Dellalunga, G.; Pogni, R.; Basosi, R. A Simple Method for Baseline Correction in EPR Spectroscopy. *Journal of Magnetic Resonance, Series A* **1994**, *108* (1), 65-70. DOI: <https://doi.org/10.1006/jmra.1994.1089>.
- (62) Stewart, R. C.; Massey, V. Potentiometric studies of native and flavin-substituted Old Yellow Enzyme. *Journal of Biological Chemistry* **1985**, *260* (25), 13639-13647. DOI: 10.1016/S0021-9258(17)38773-2 (accessed 2023/01/01).
- (63) Luft, J. R.; Collins, R. J.; Fehrman, N. A.; Lauricella, A. M.; Veatch, C. K.; DeTitta, G. T. A deliberate approach to screening for initial crystallization conditions of biological macromolecules. *Journal of Structural Biology* **2003**, *142* (1), 170-179. DOI: [https://doi.org/10.1016/S1047-8477\(03\)00048-0](https://doi.org/10.1016/S1047-8477(03)00048-0).
- (64) Winter, G.; Waterman, D. G.; Parkhurst, J. M.; Brewster, A. S.; Gildea, R. J.; Gerstel, M.; Fuentes-Montero, L.; Vollmar, M.; Michels-Clark, T.; Young, I. D.; et al. DIALS: implementation and evaluation of a new integration package. *Acta Crystallographica Section D* **2018**, *74* (2), 85-97.
- (65) Evans, P. R.; Murshudov, G. N. How good are my data and what is the resolution? *Acta Crystallographica Section D* **2013**, *69* (7), 1204-1214.
- (66) McCoy, A. J.; Grosse-Kunstleve, R. W.; Adams, P. D.; Winn, M. D.; Storoni, L. C.; Read, R. J. Phaser crystallographic software. *Journal of Applied Crystallography* **2007**, *40* (4), 658-674.
- (67) Emsley, P.; Cowtan, K. Coot: model-building tools for molecular graphics. *Acta Crystallographica Section D* **2004**, *60* (12), 2126-2132.
- (68) Liebschner, D.; Afonine, P. V.; Baker, M. L.; Bunkoczi, G.; Chen, V. B.; Croll, T. I.; Hintze, B.; Hung, L.-W.; Jain, S.; McCoy, A. J.; et al. Macromolecular structure determination using X-rays, neutrons and electrons: recent developments in Phenix. *Acta Crystallographica Section D* **2019**, *75* (10), 861-877.

- (69) Rigaku, O. D.; Crystalclear, M. S. C. The Woodlands. TX: 2015.
- (70) Sheldrick, G. SHELXT - Integrated space-group and crystal-structure determination. *Acta Crystallographica Section A* **2015**, *71* (1), 3-8.
- (71) Sheldrick, G. A short history of SHELX. *Acta Crystallographica Section A* **2008**, *64* (1), 112-122.
- (72) Müller, P. Practical suggestions for better crystal structures. *Crystallography Reviews* **2009**, *15* (1), 57-83. DOI: 10.1080/08893110802547240.



# Part XV: NMR Spectra

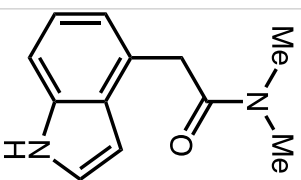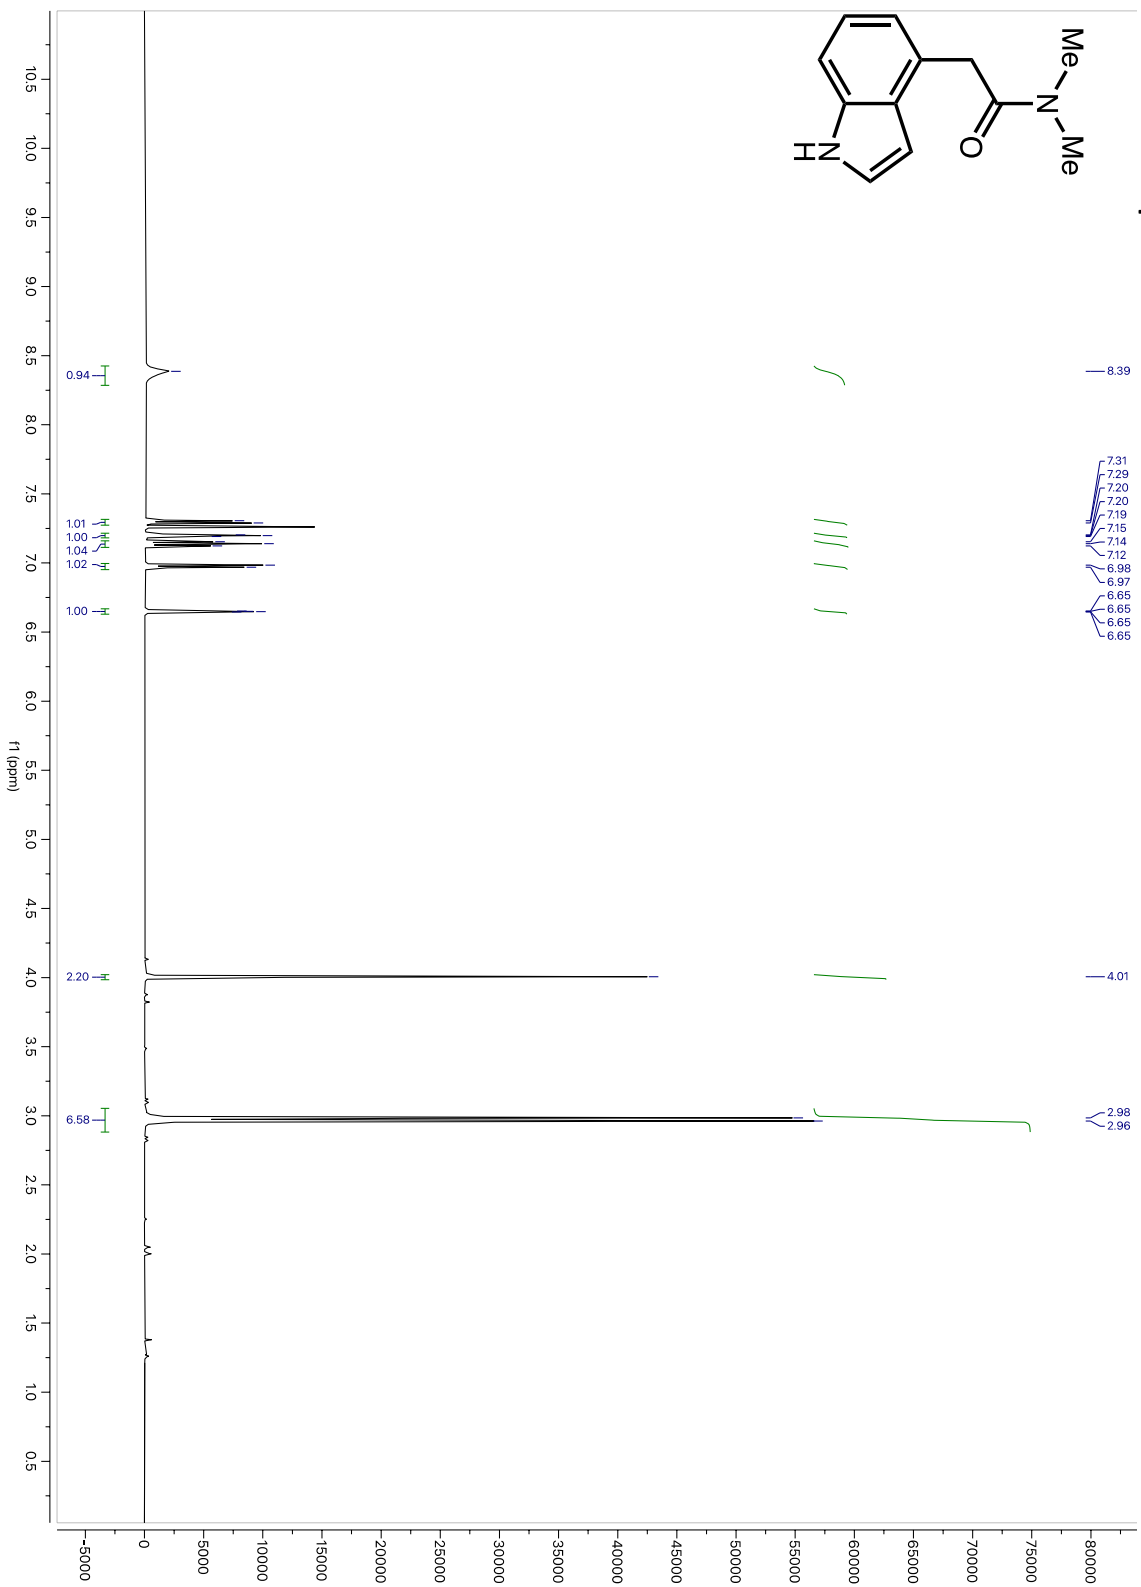

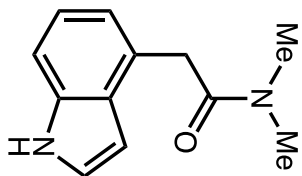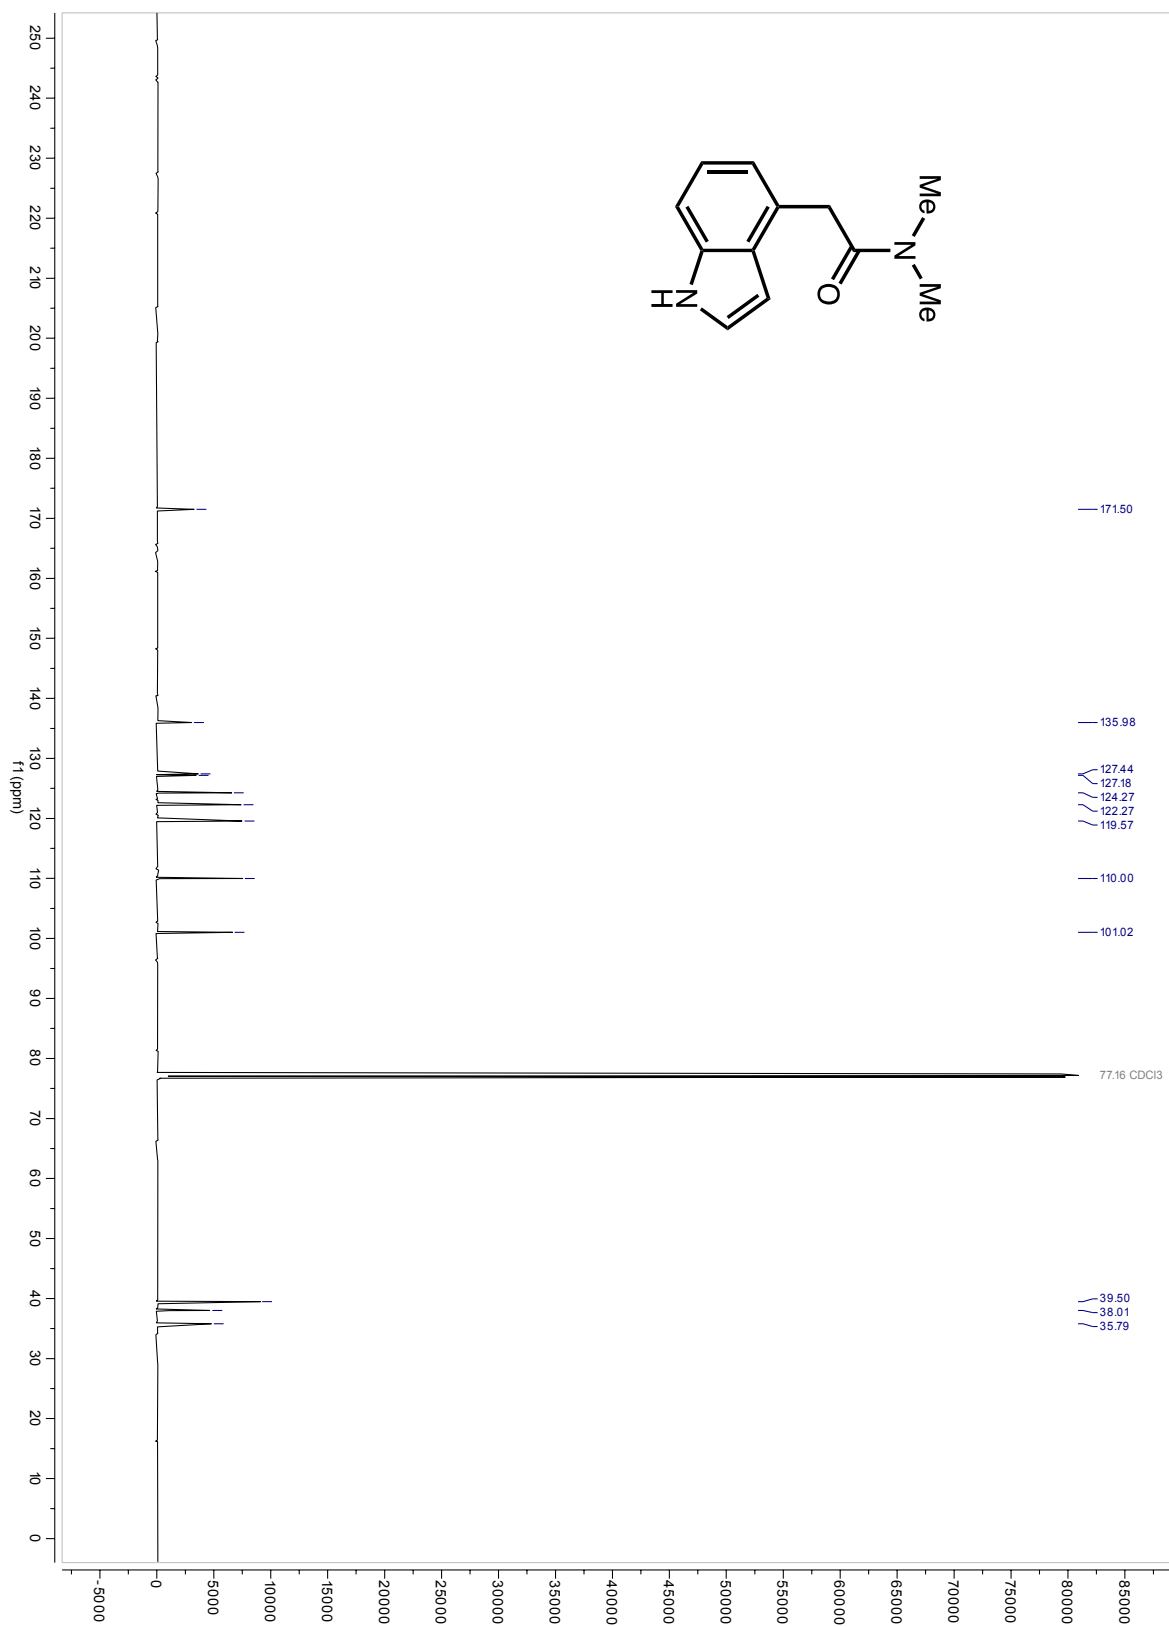

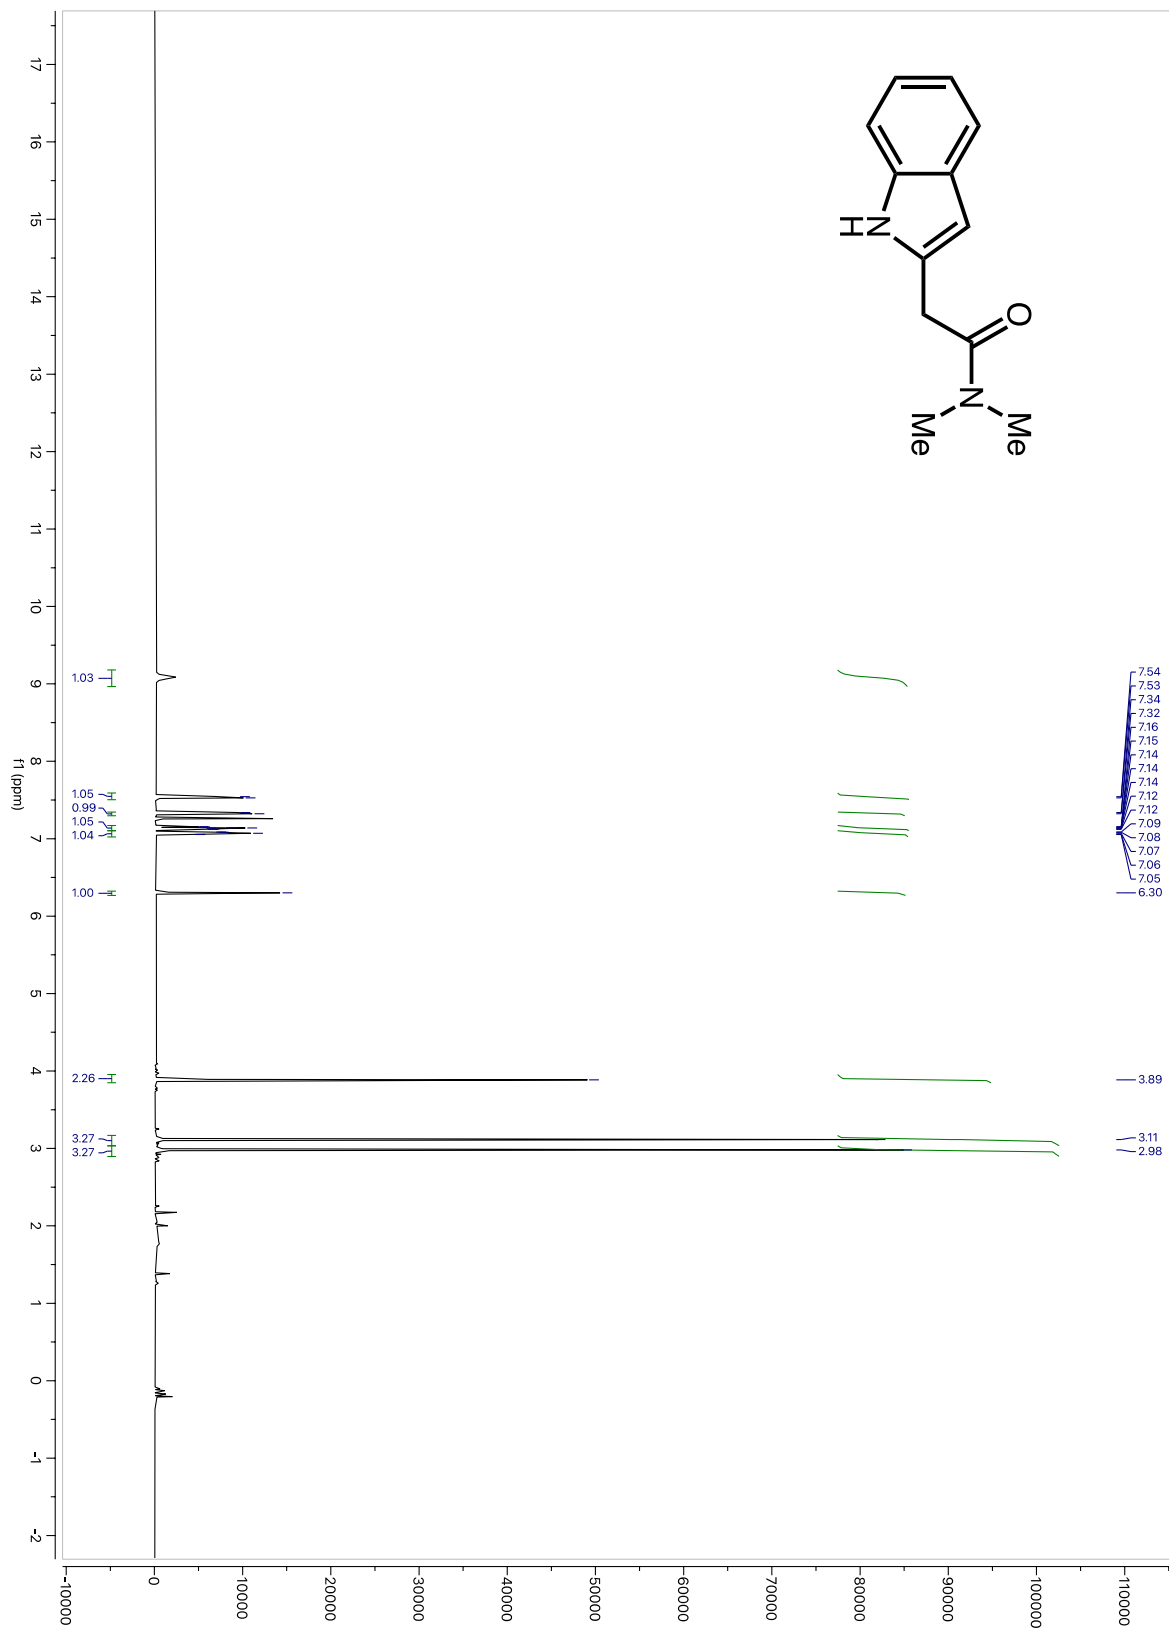

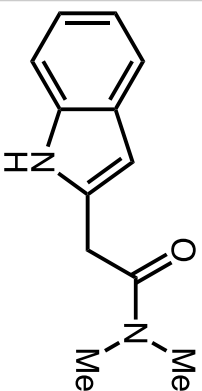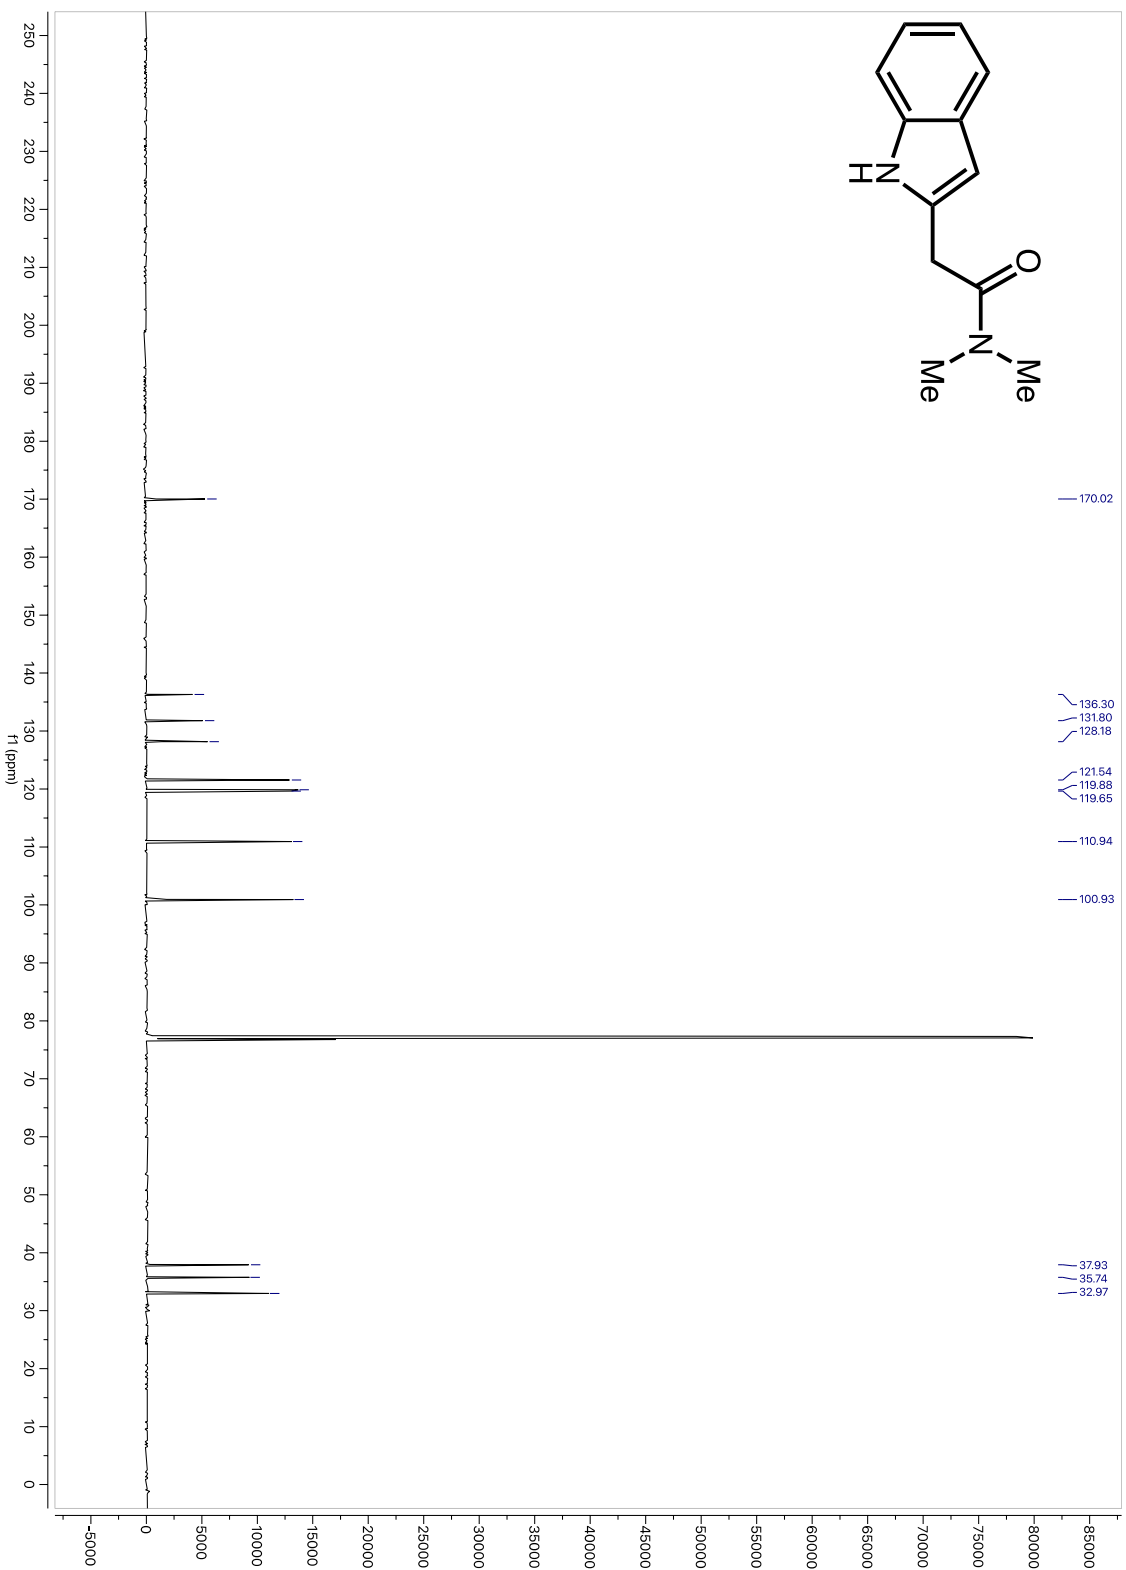

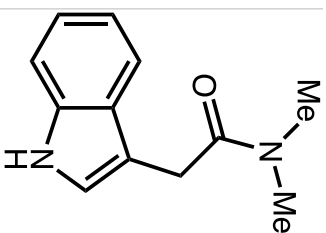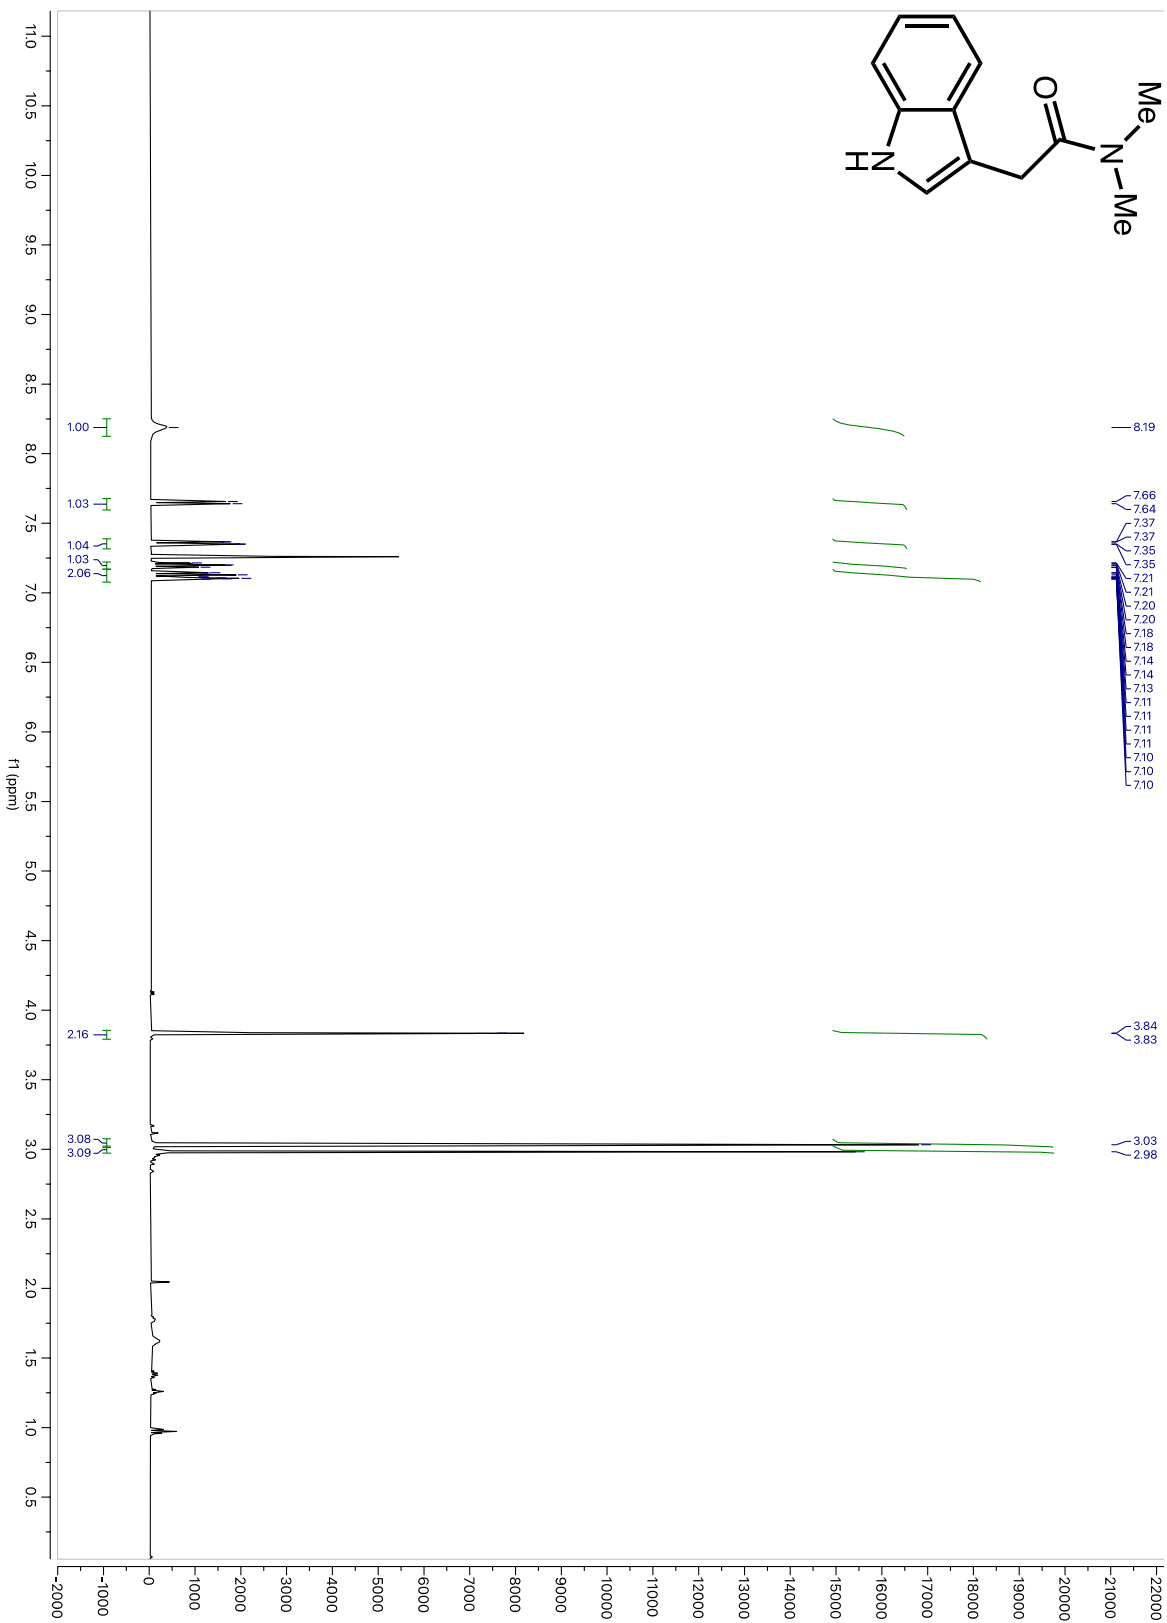

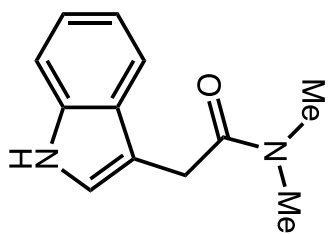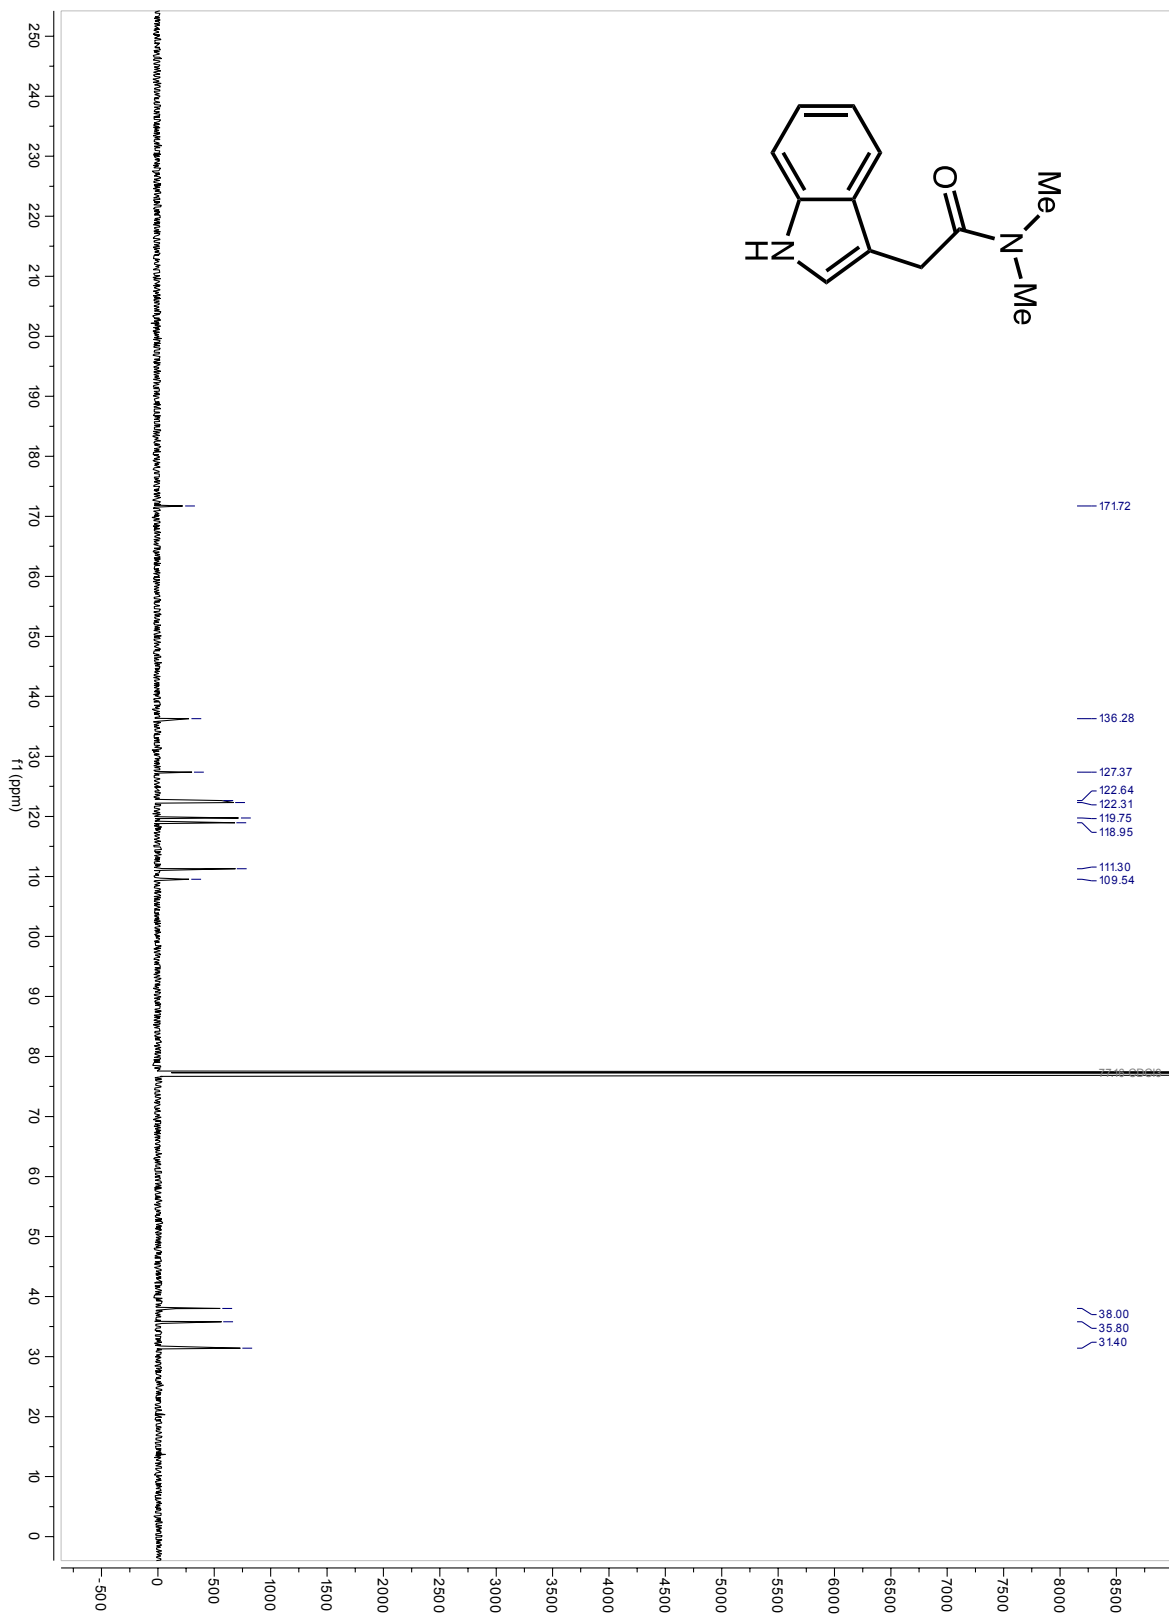

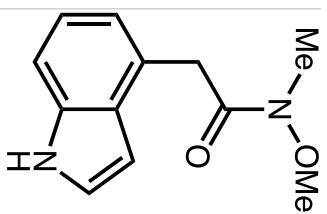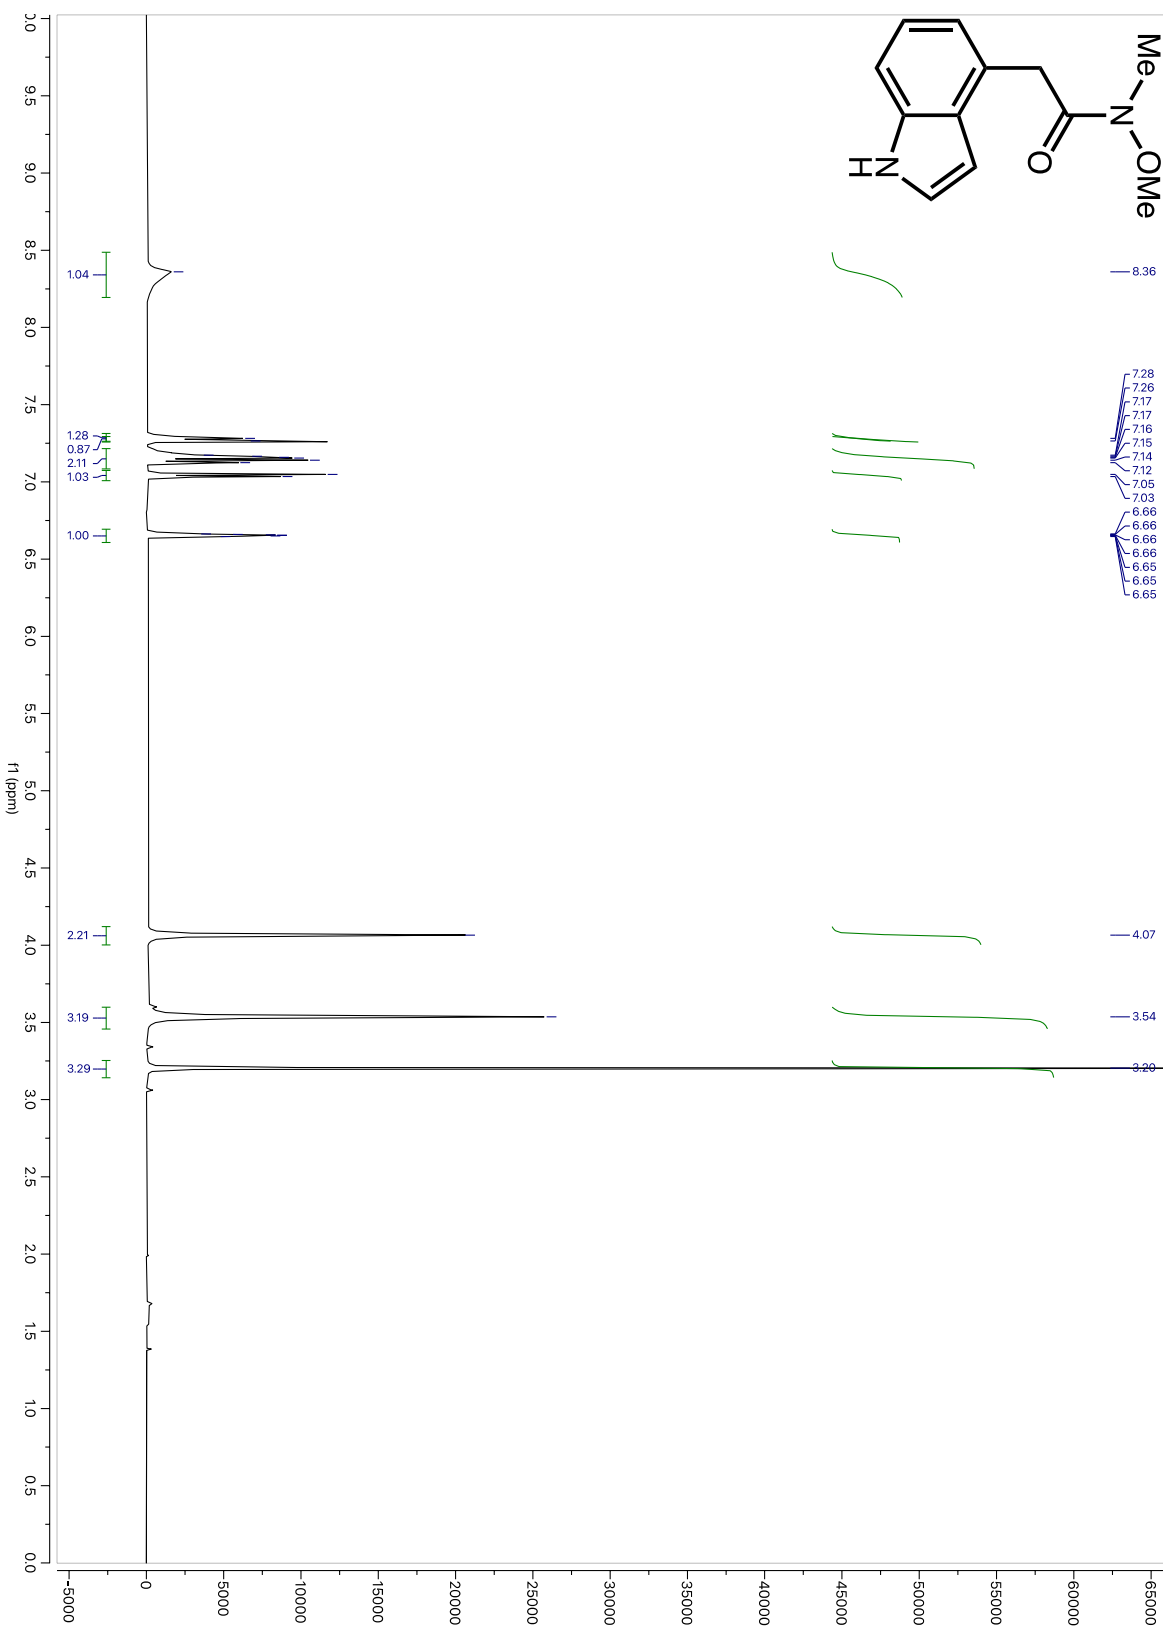

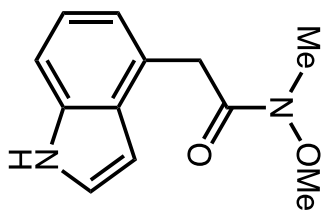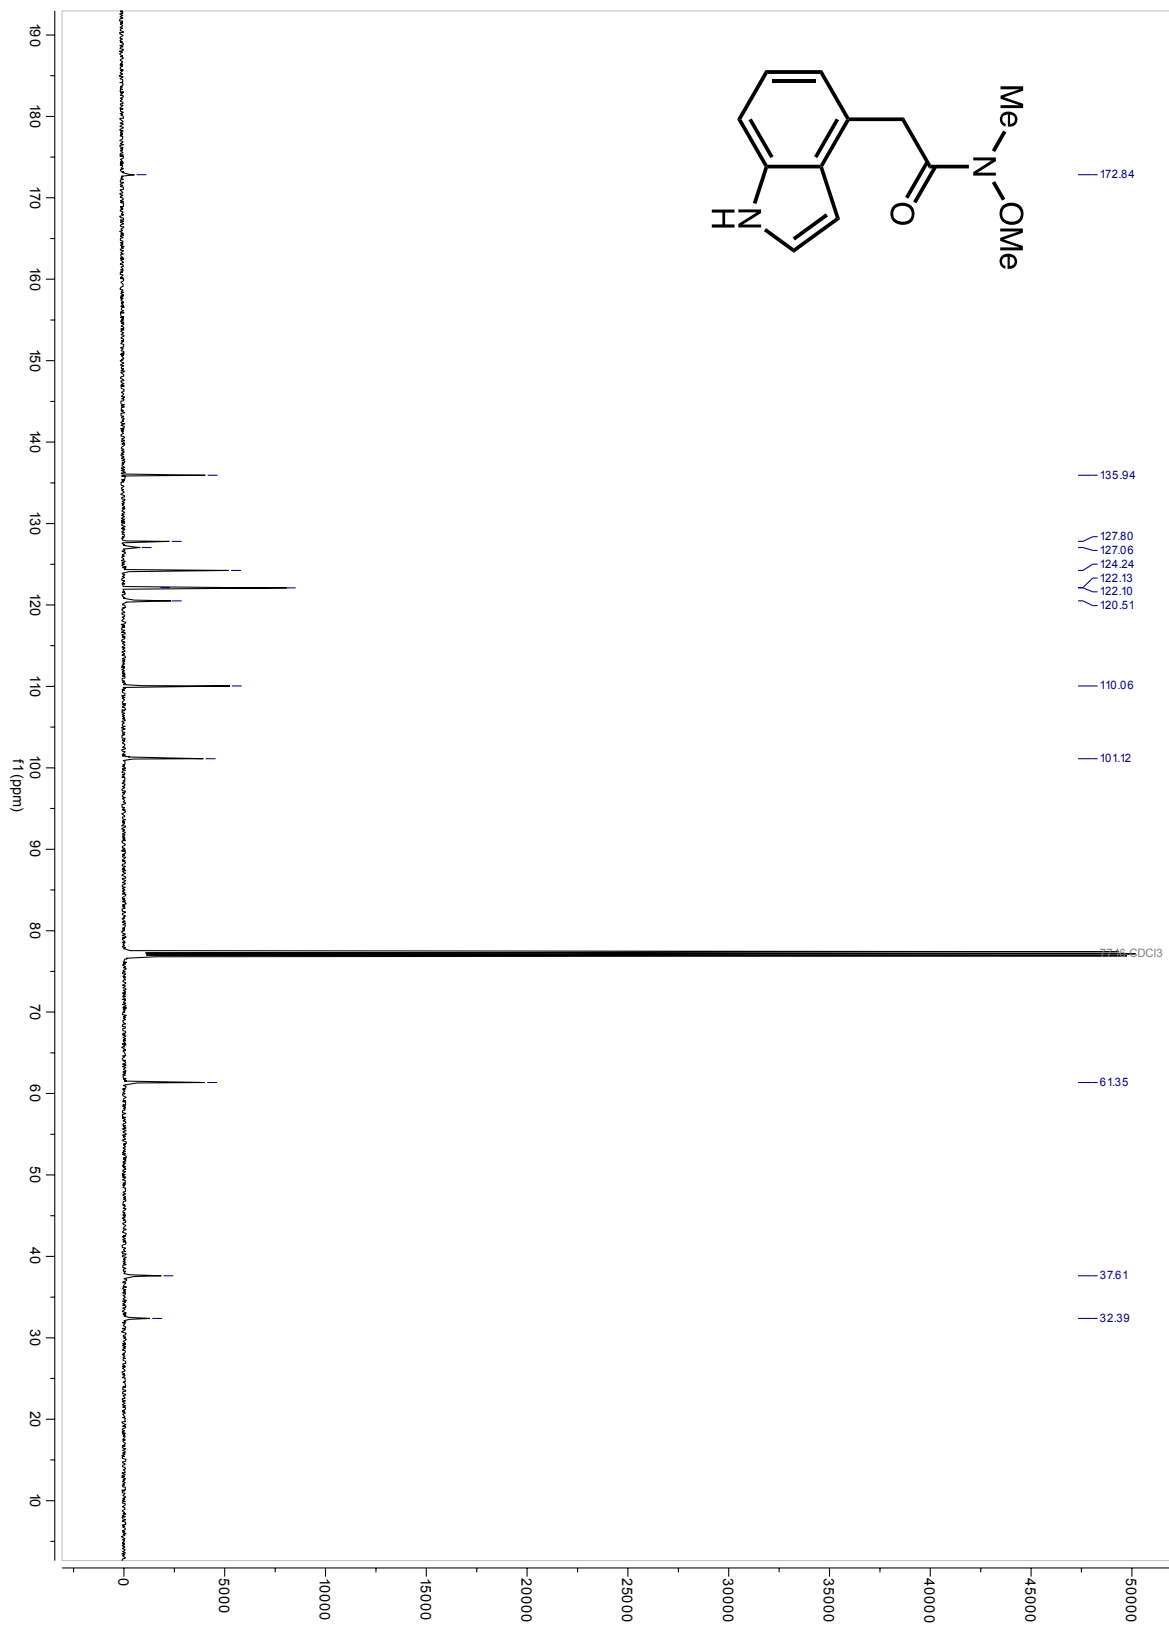



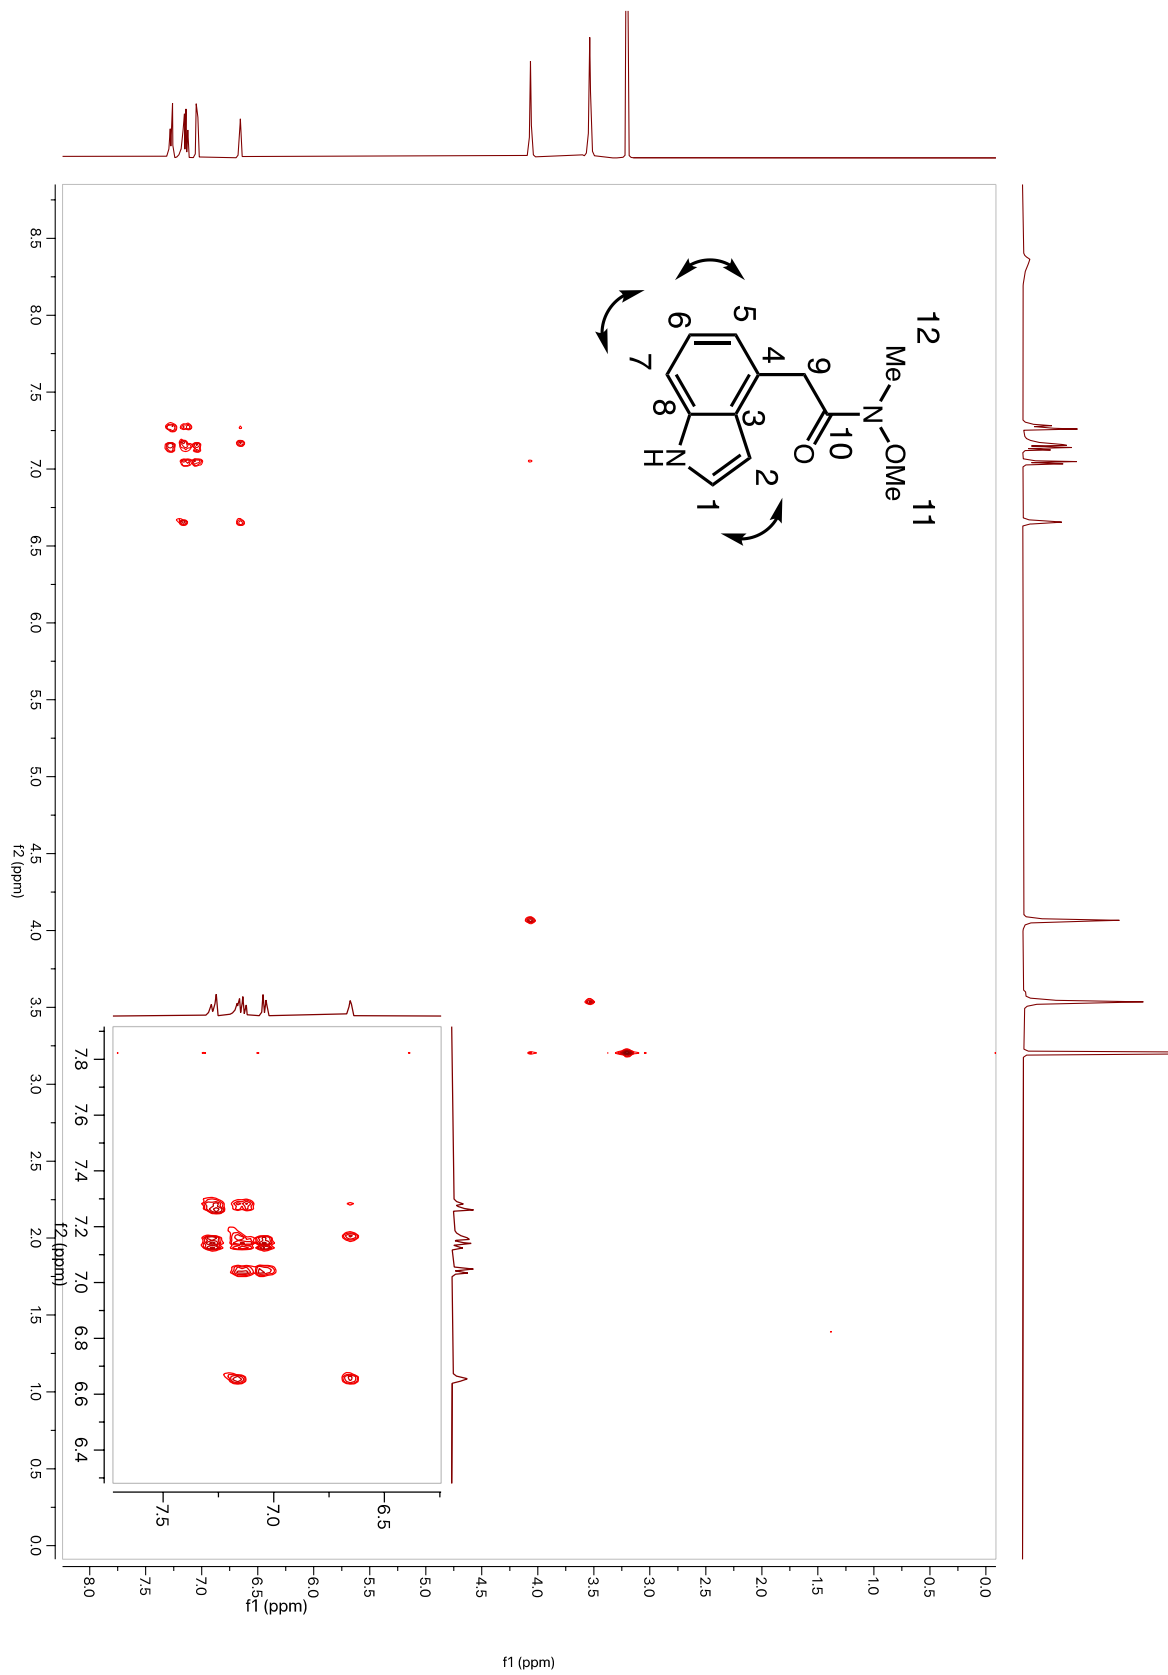

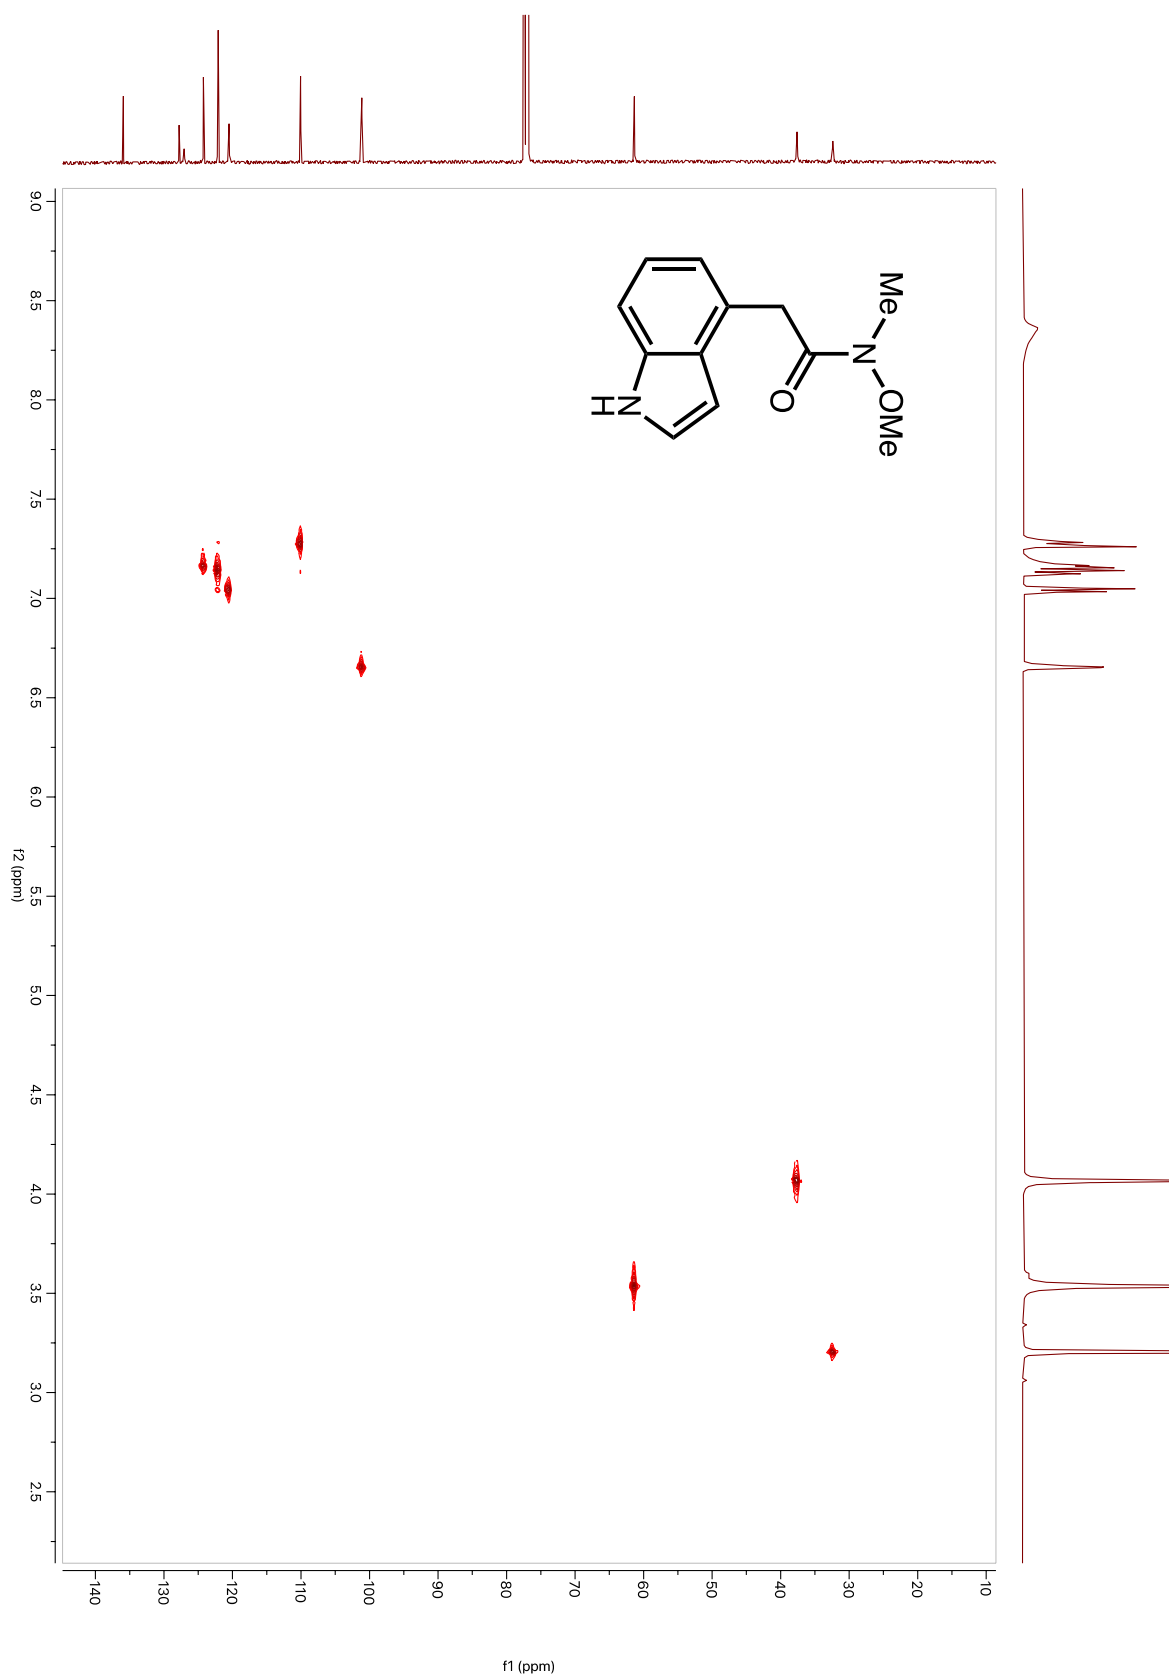

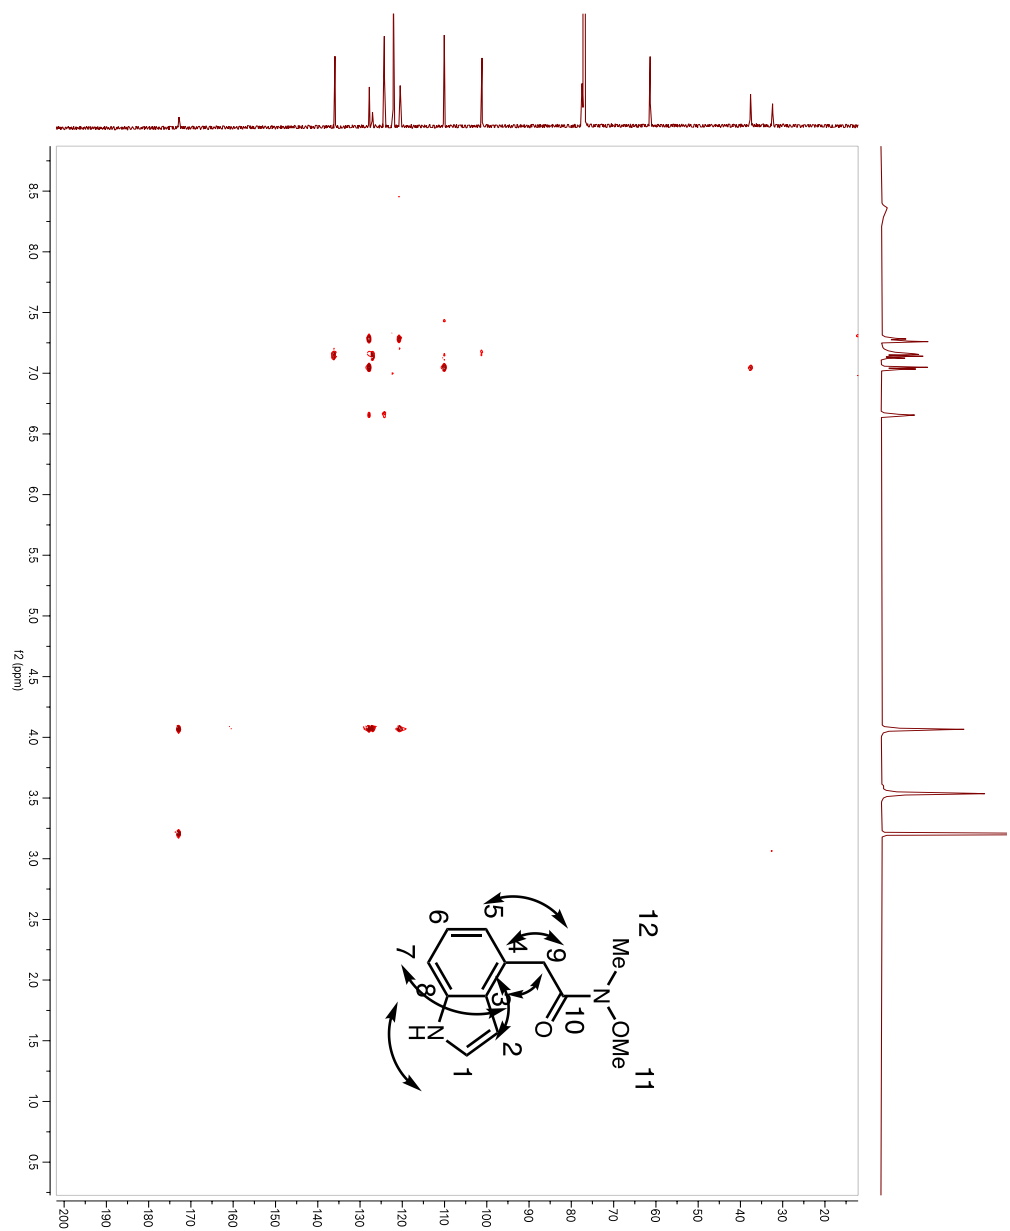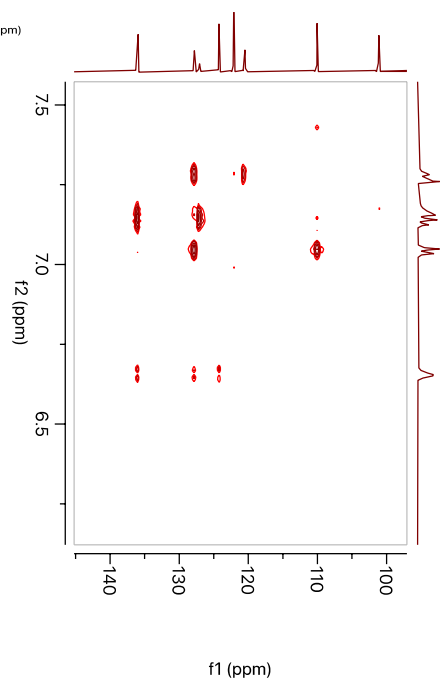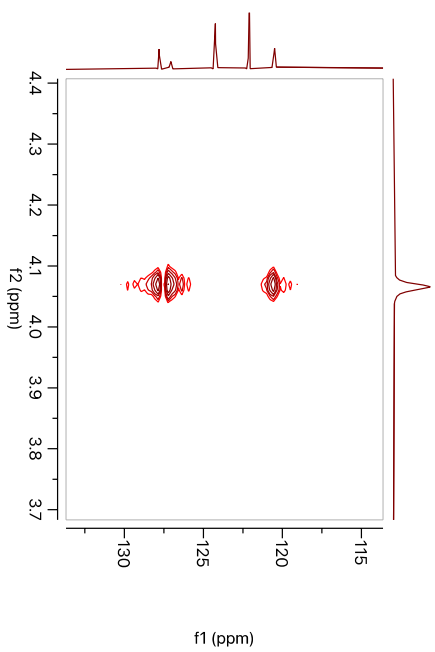

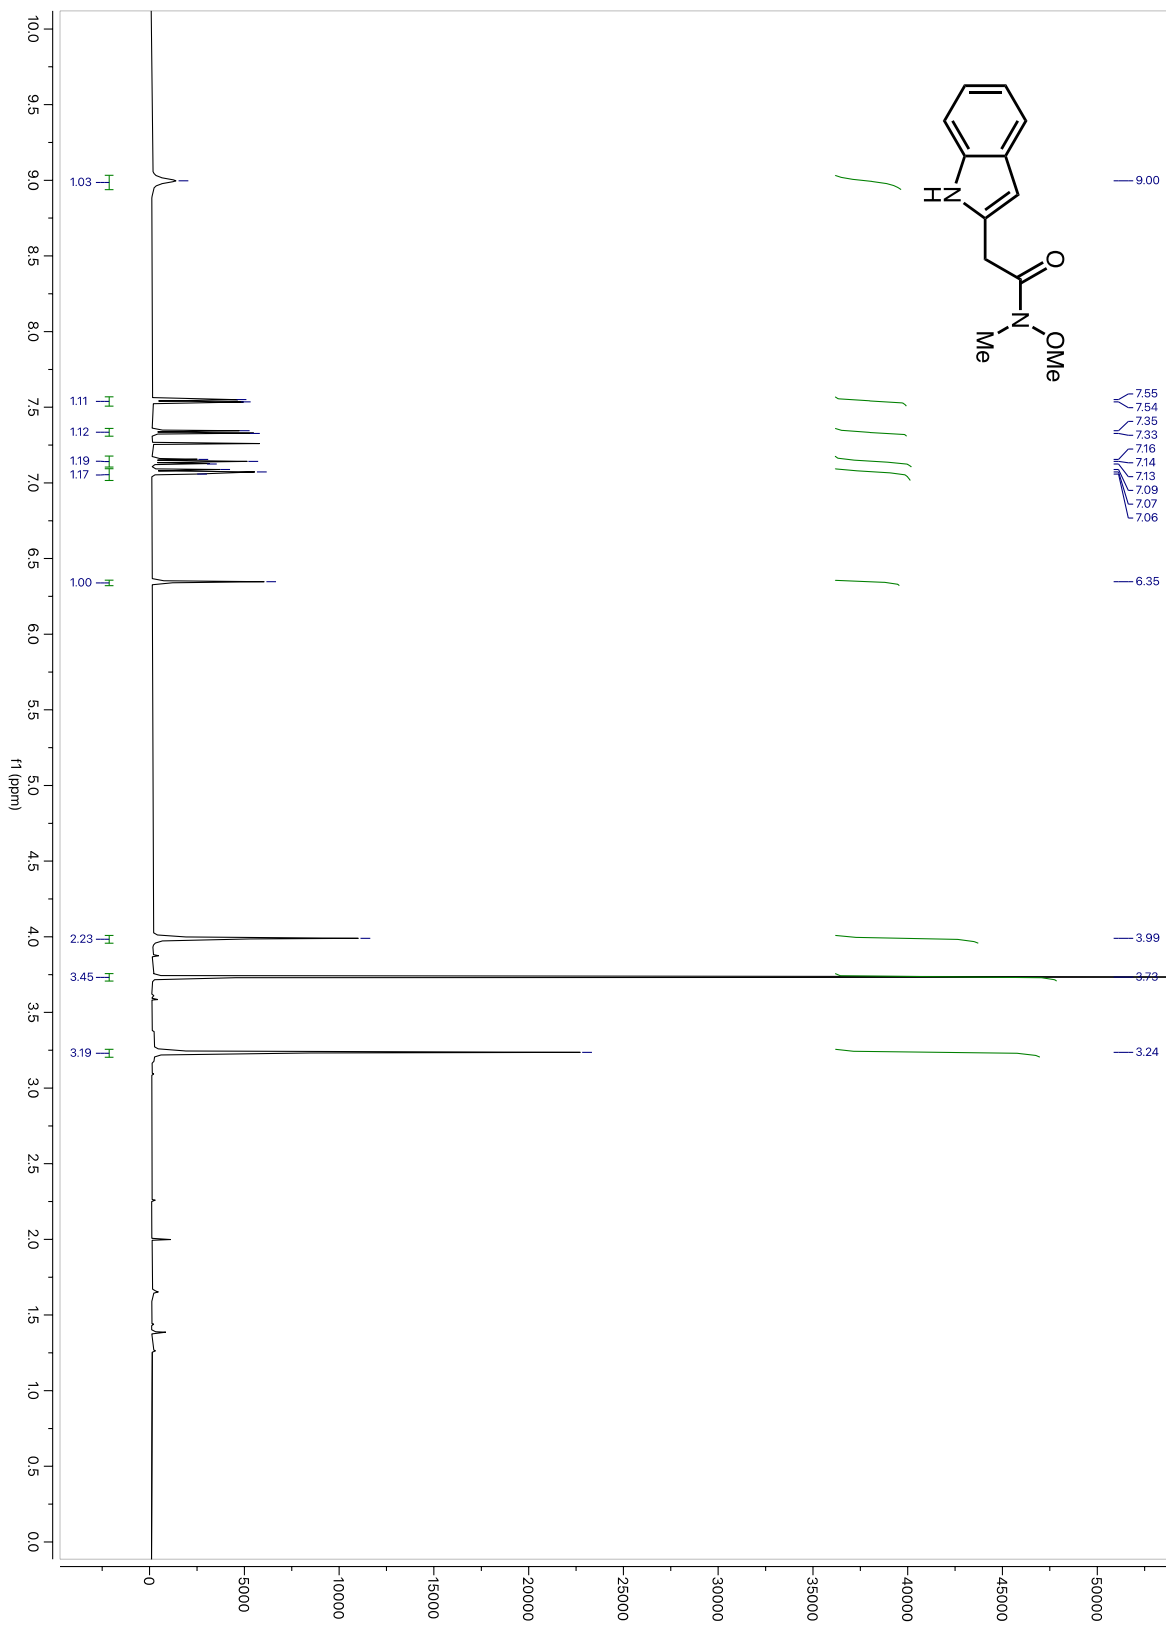

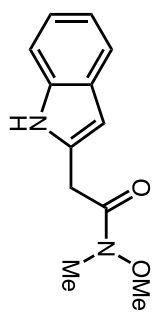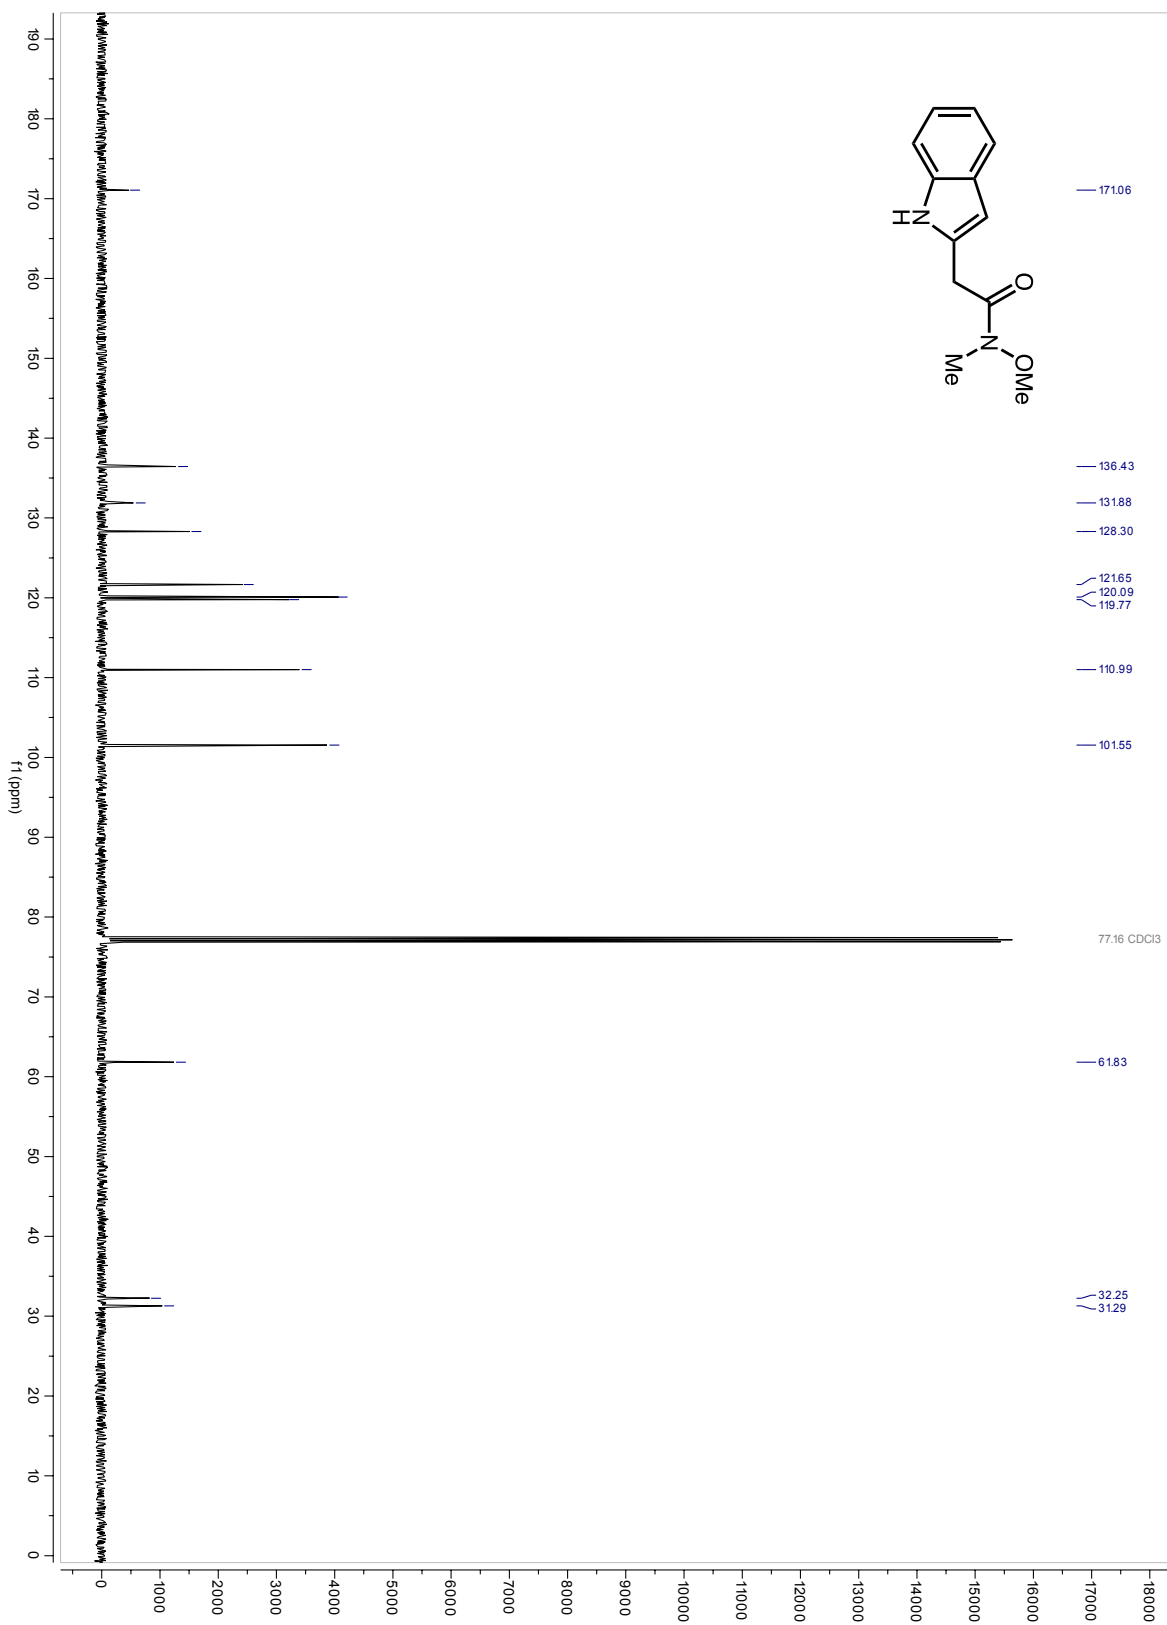

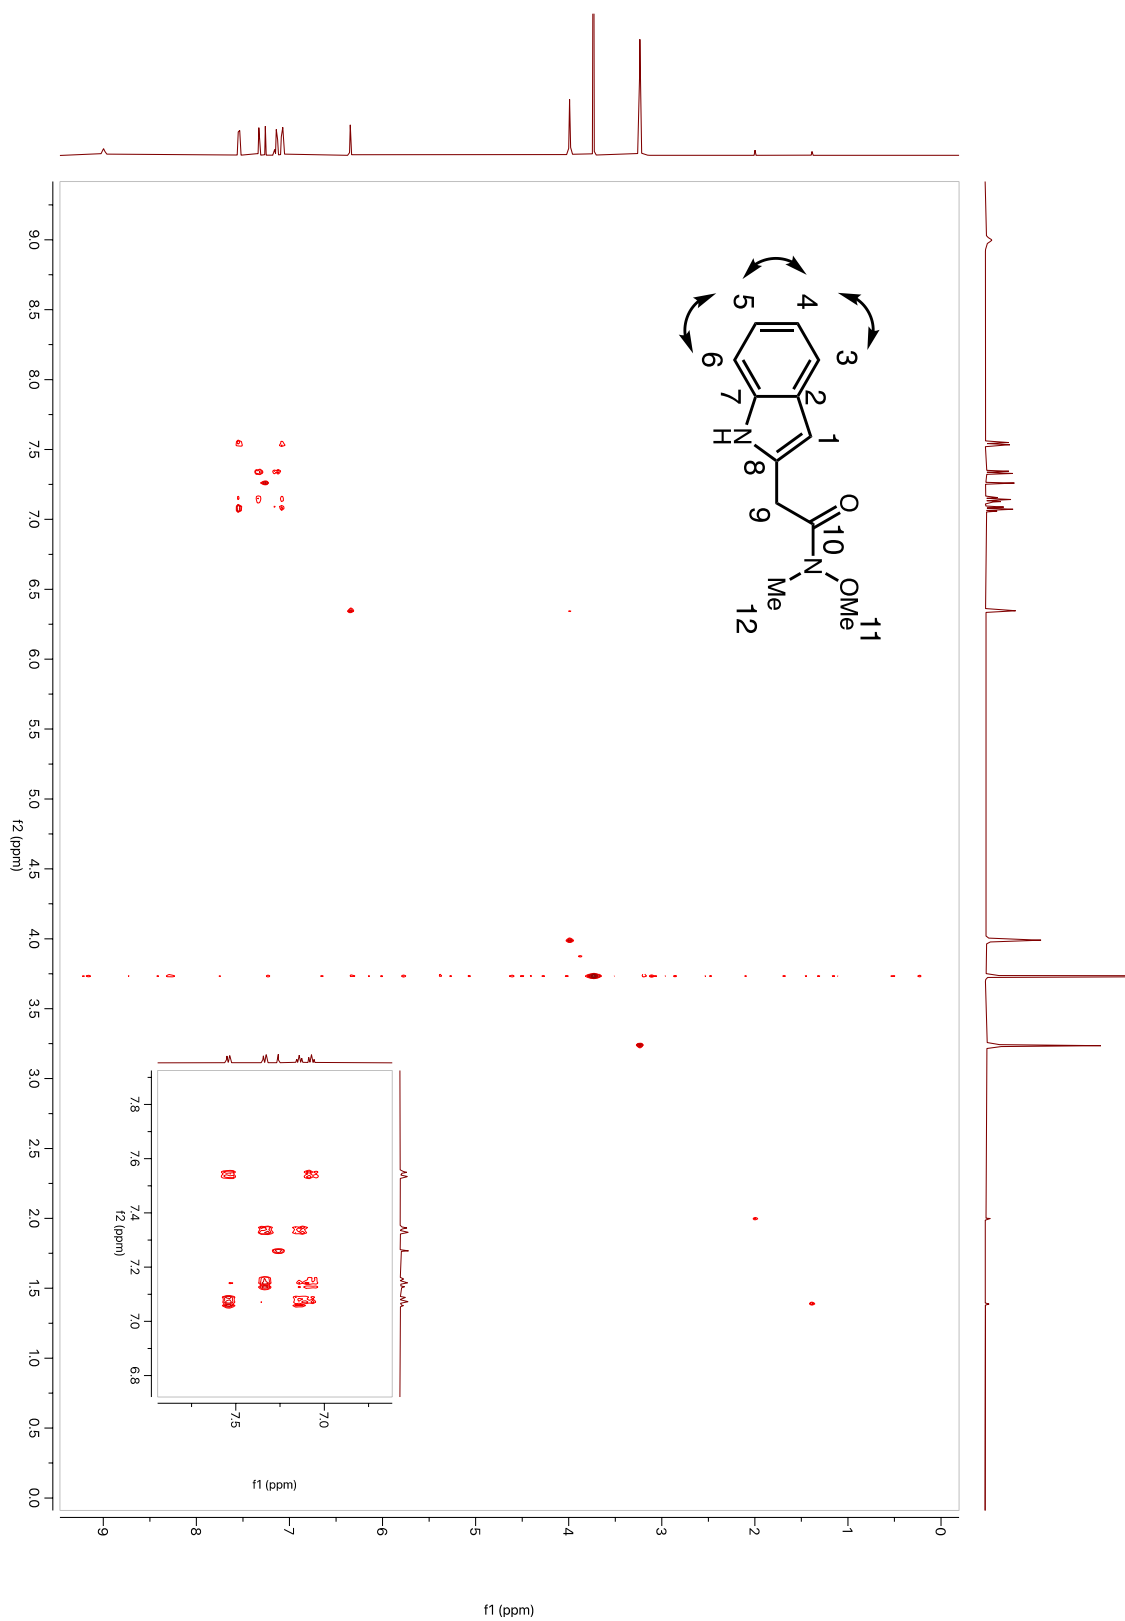

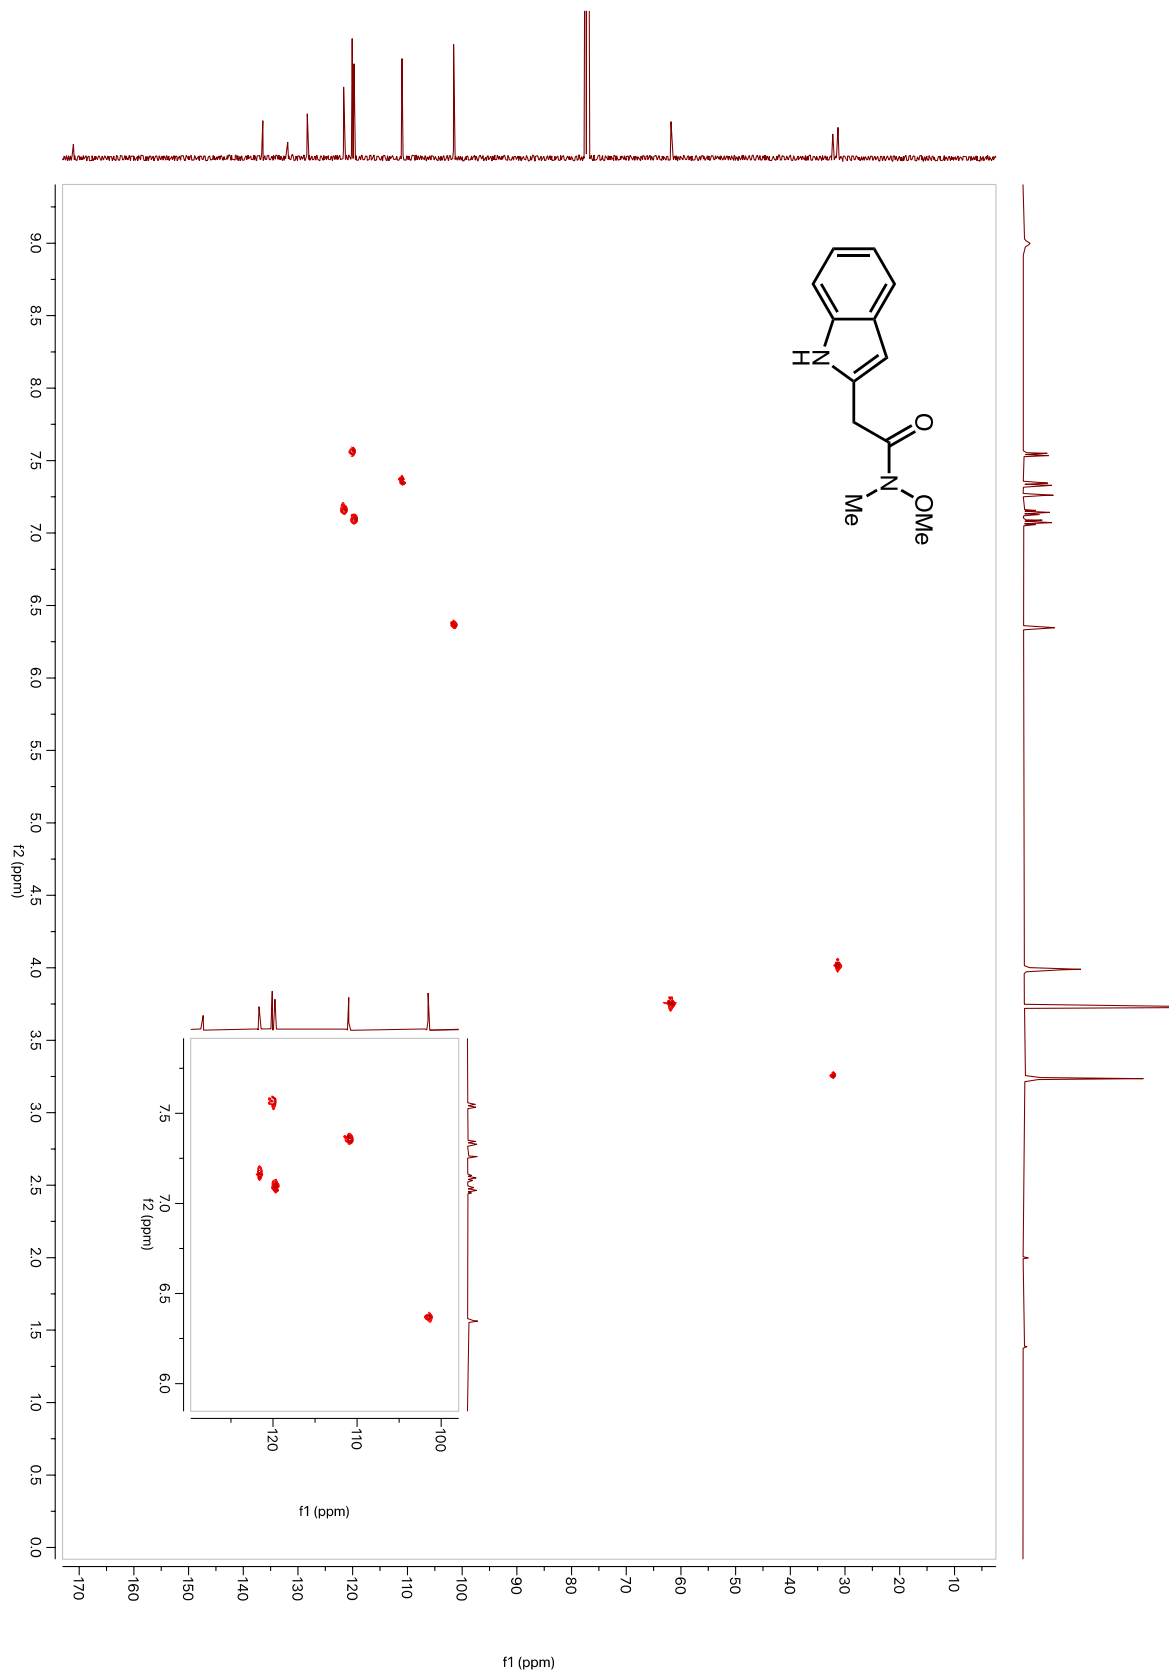

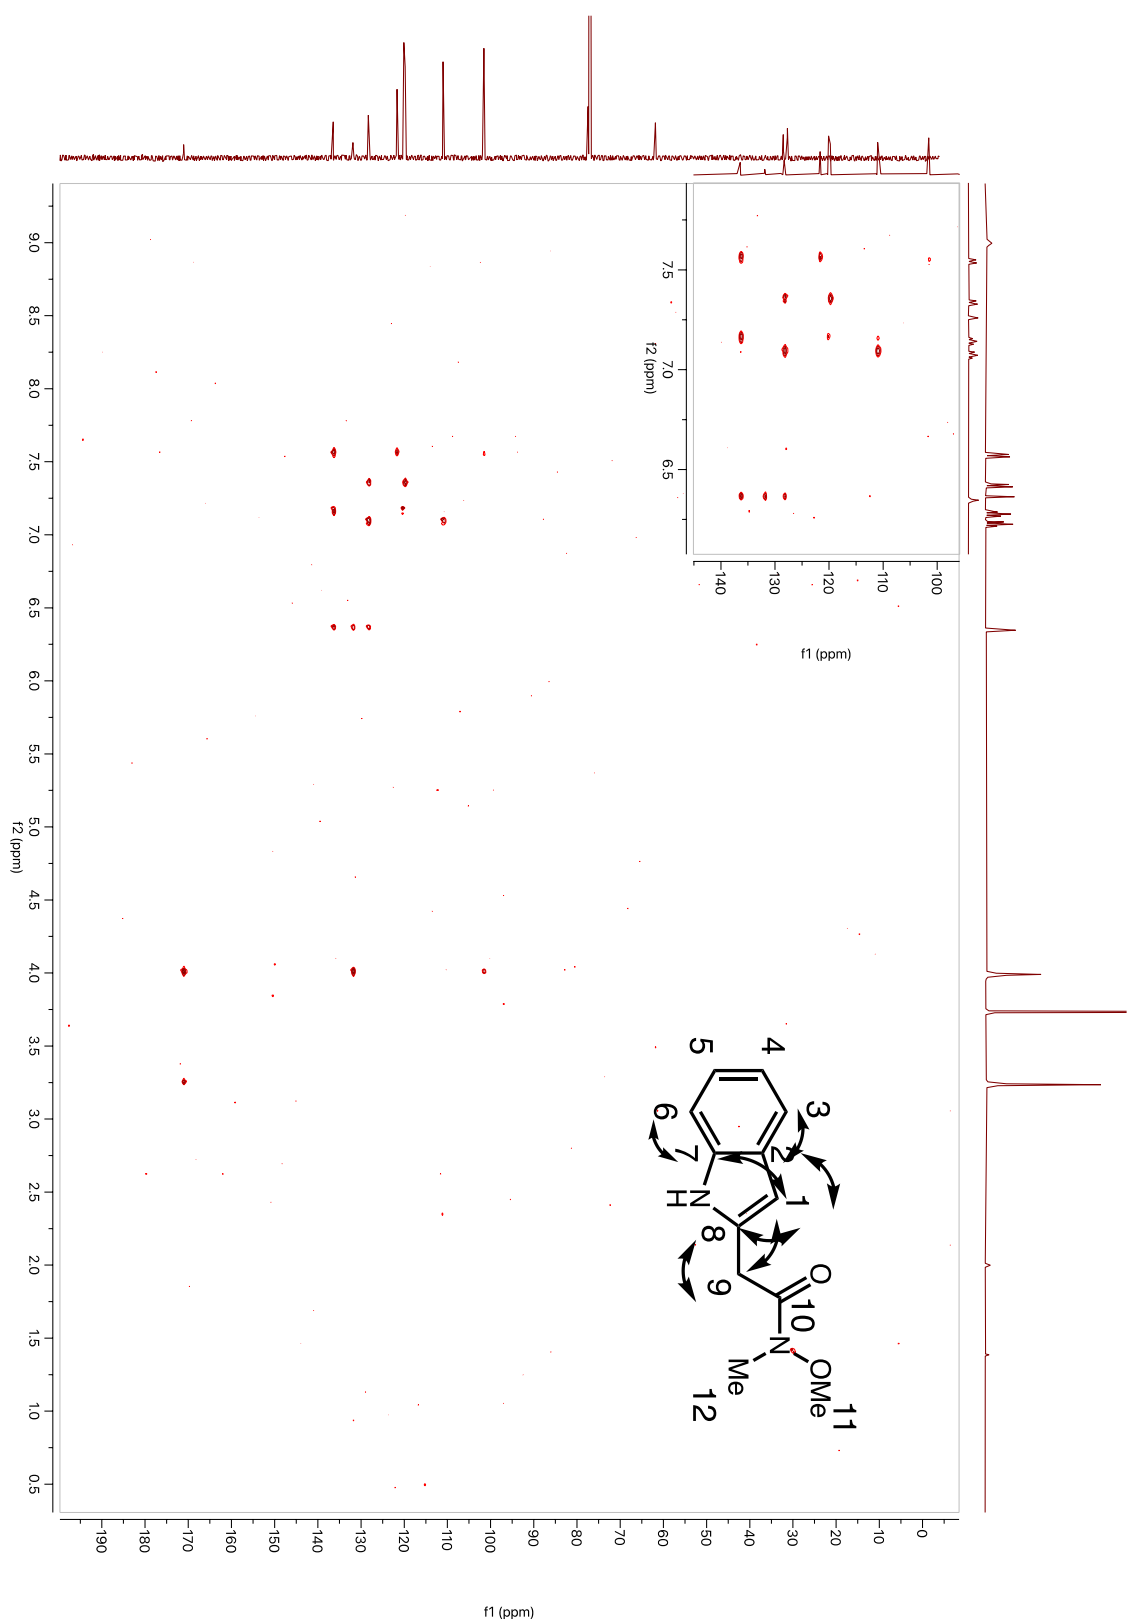



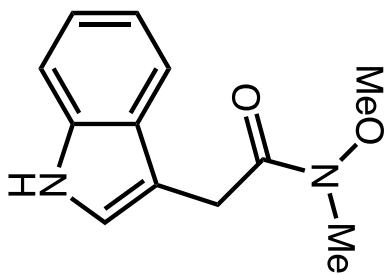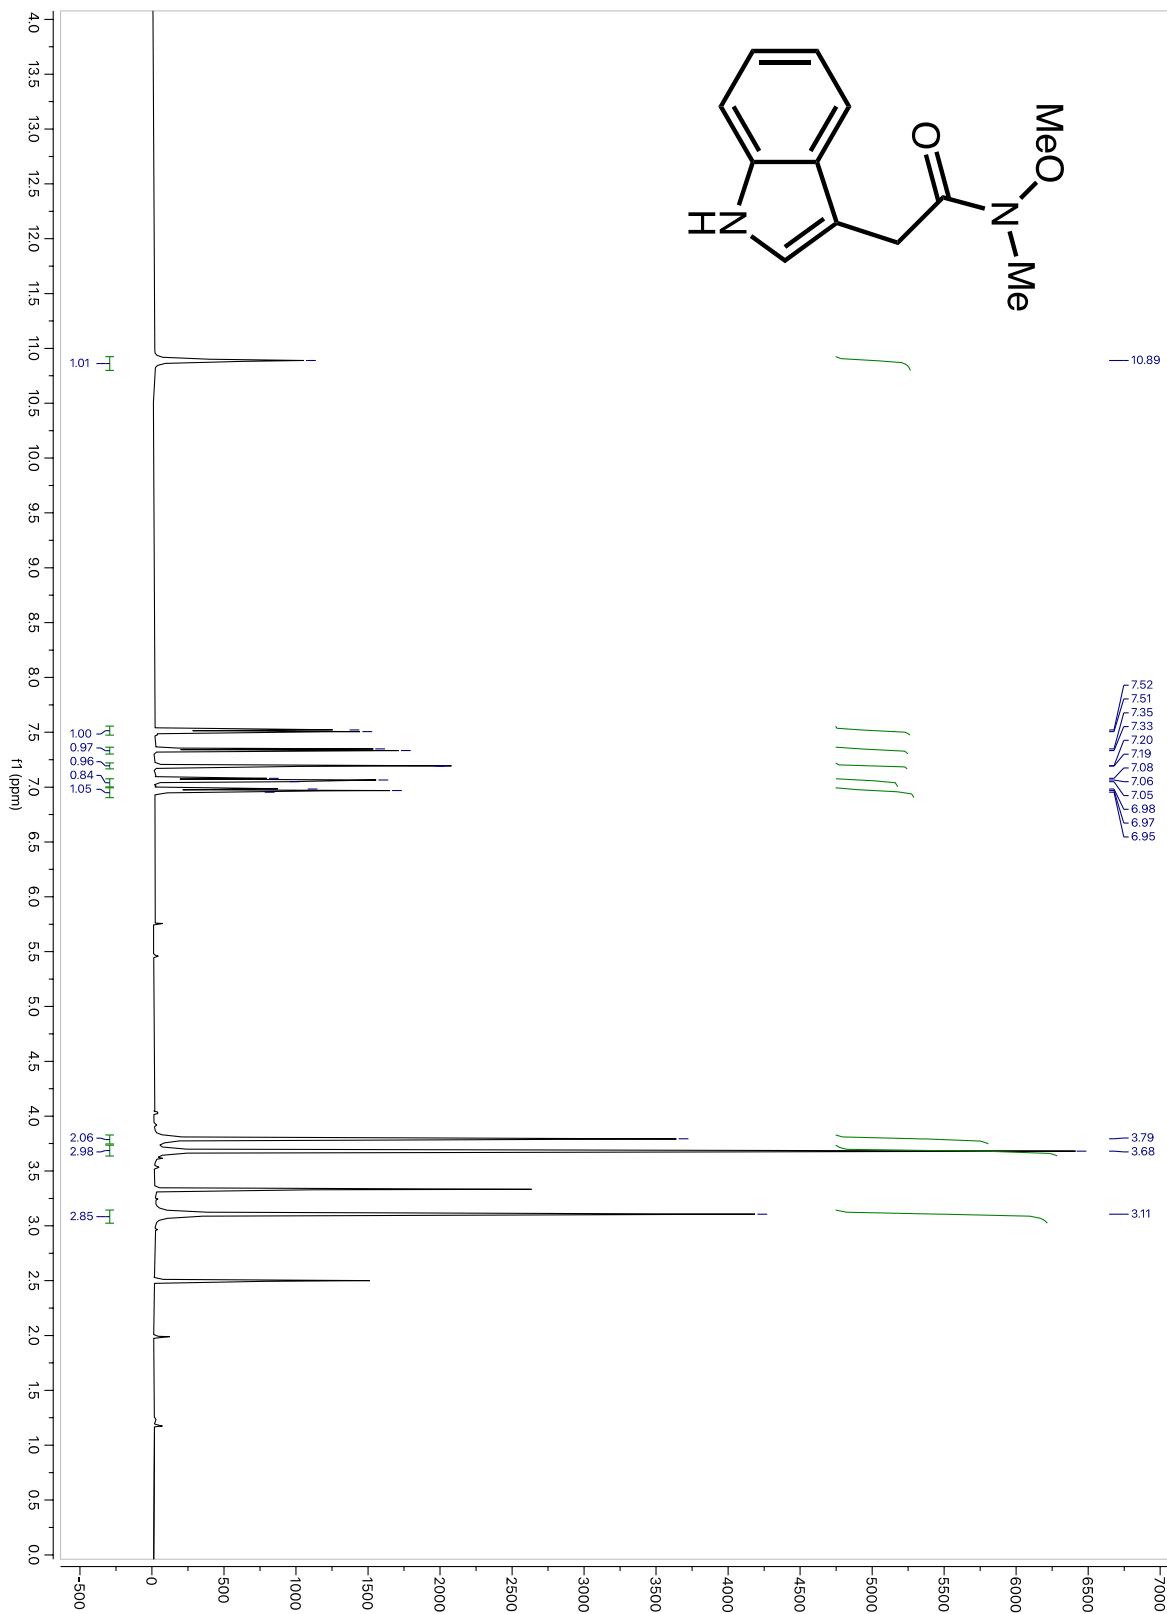

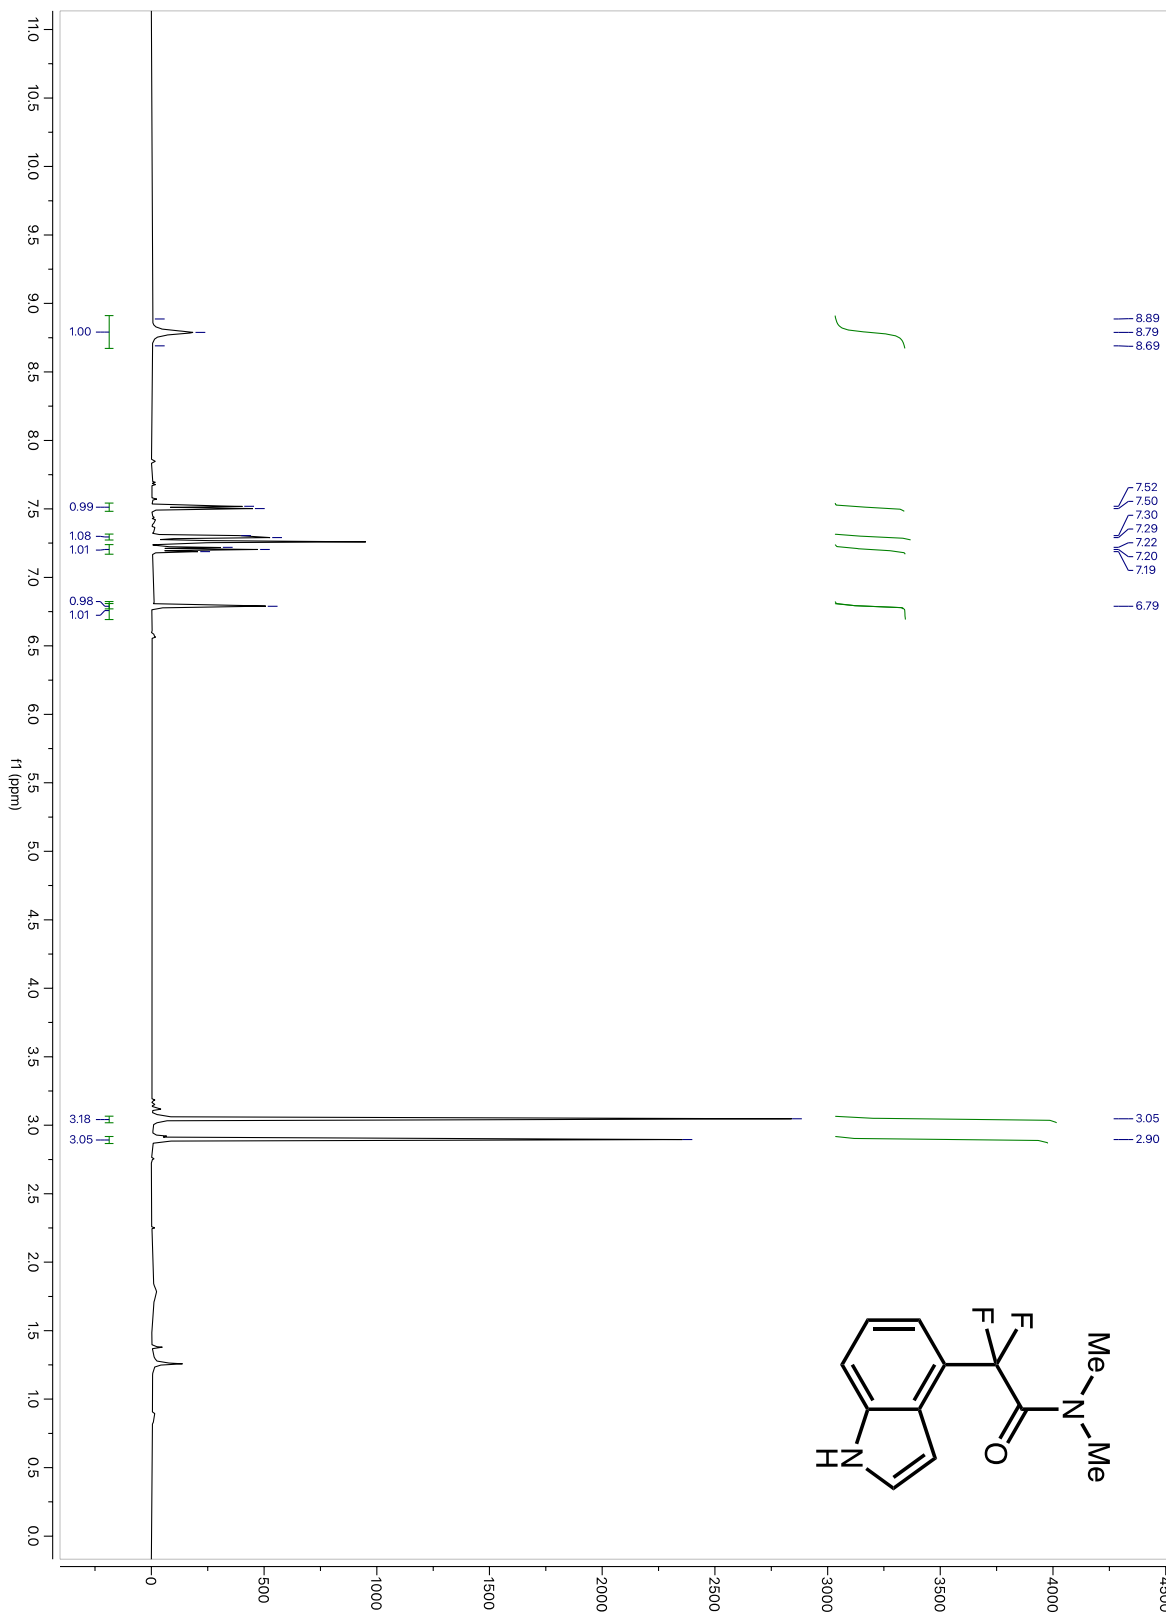

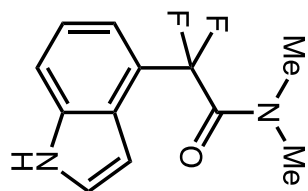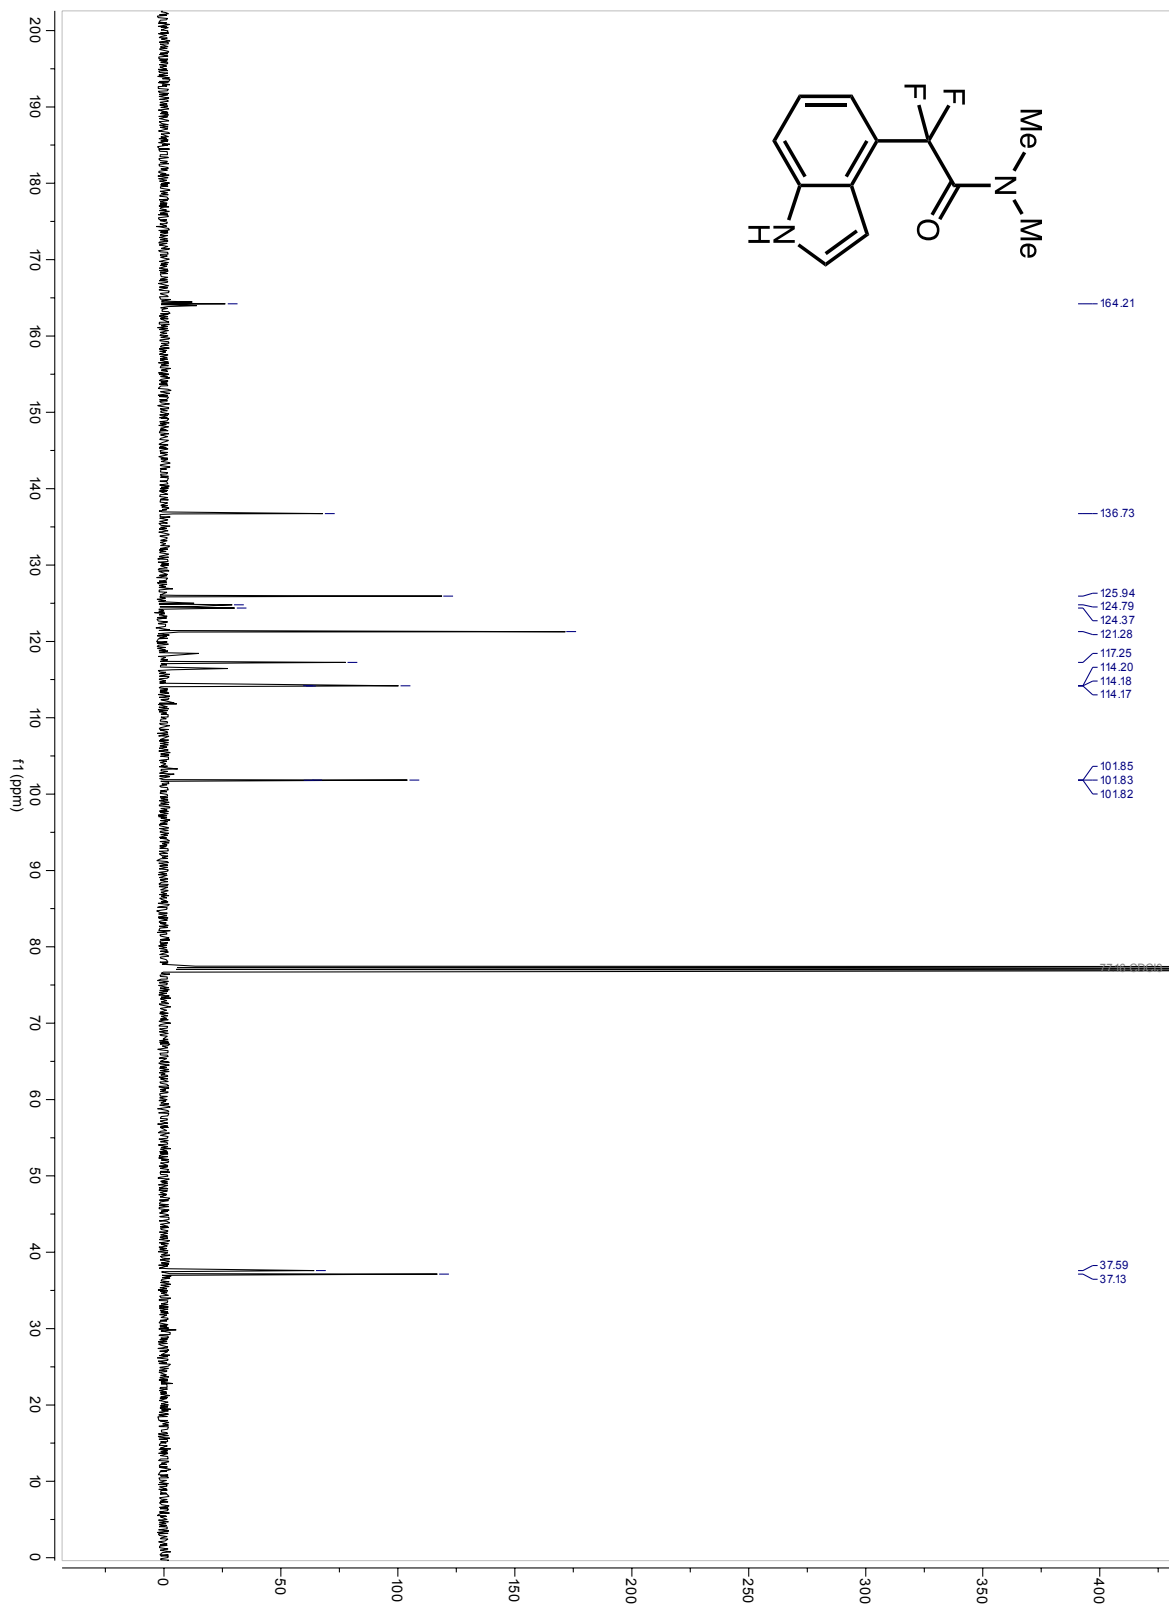

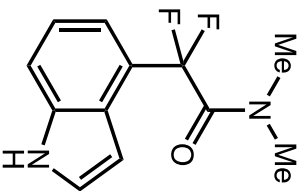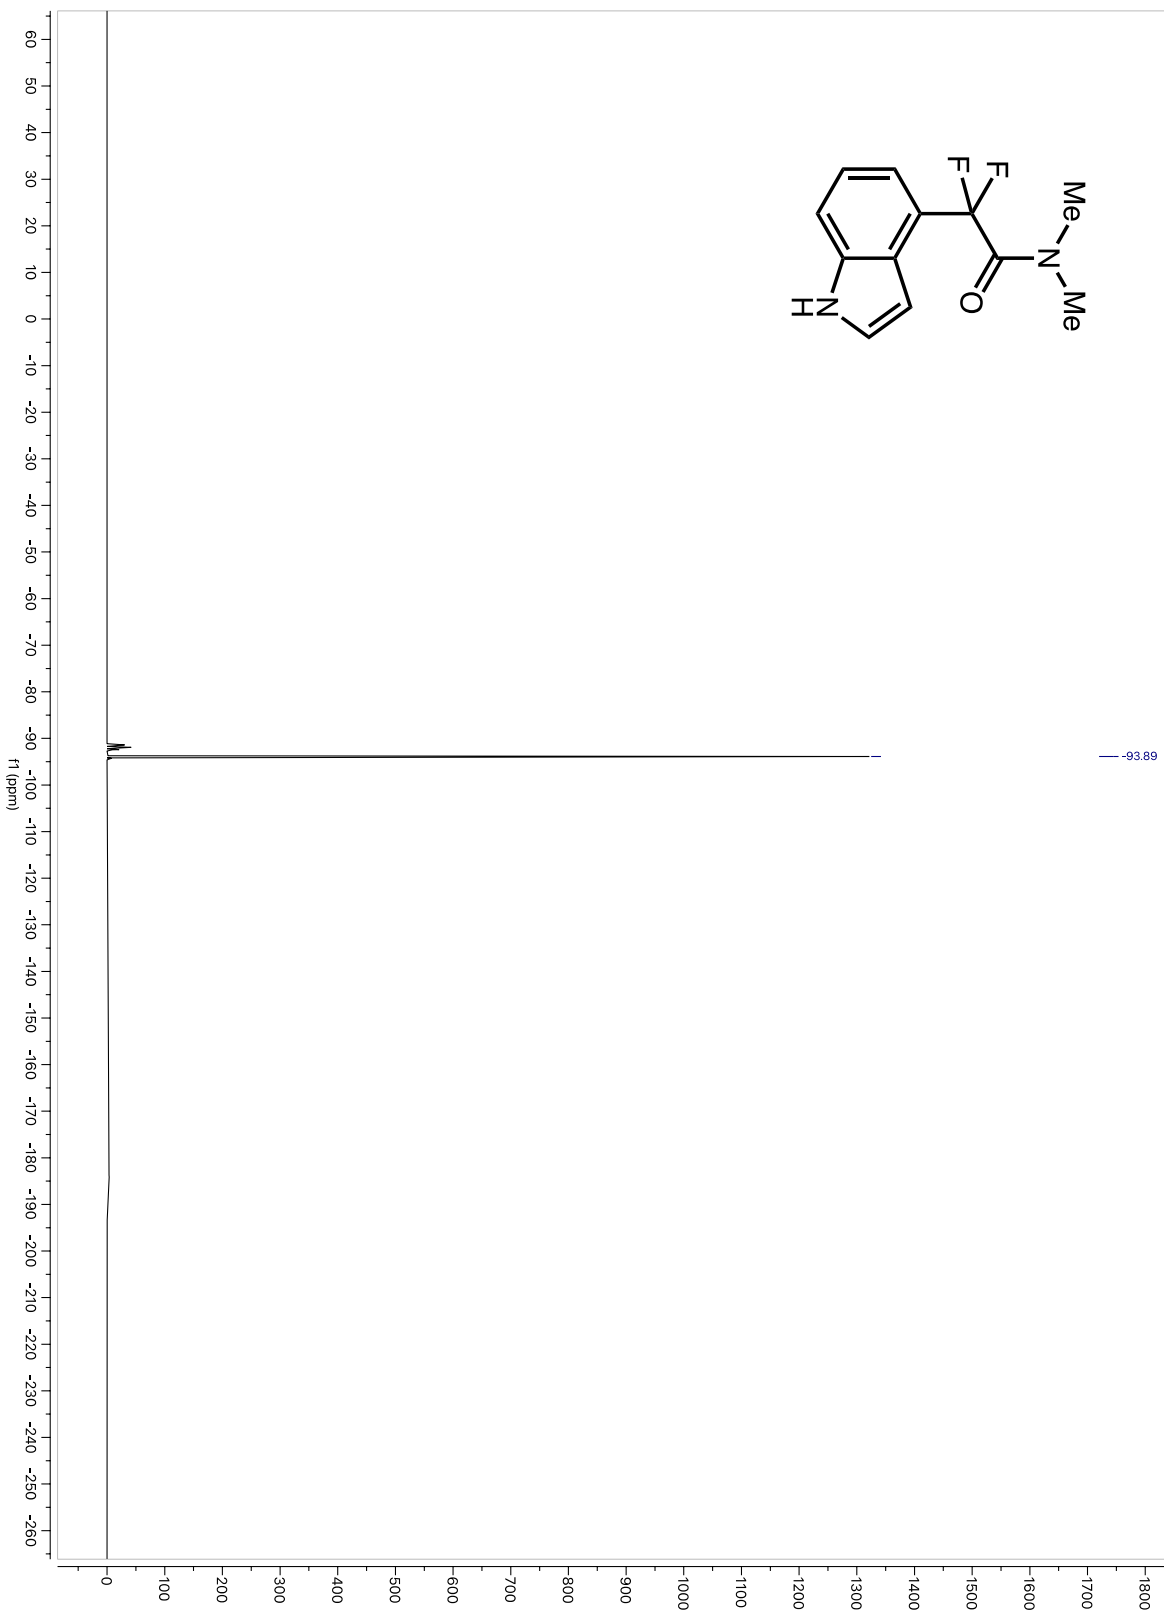

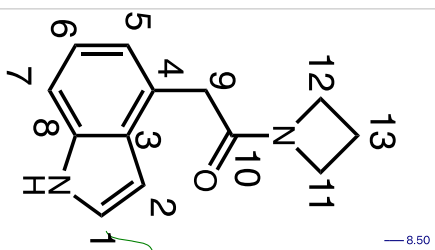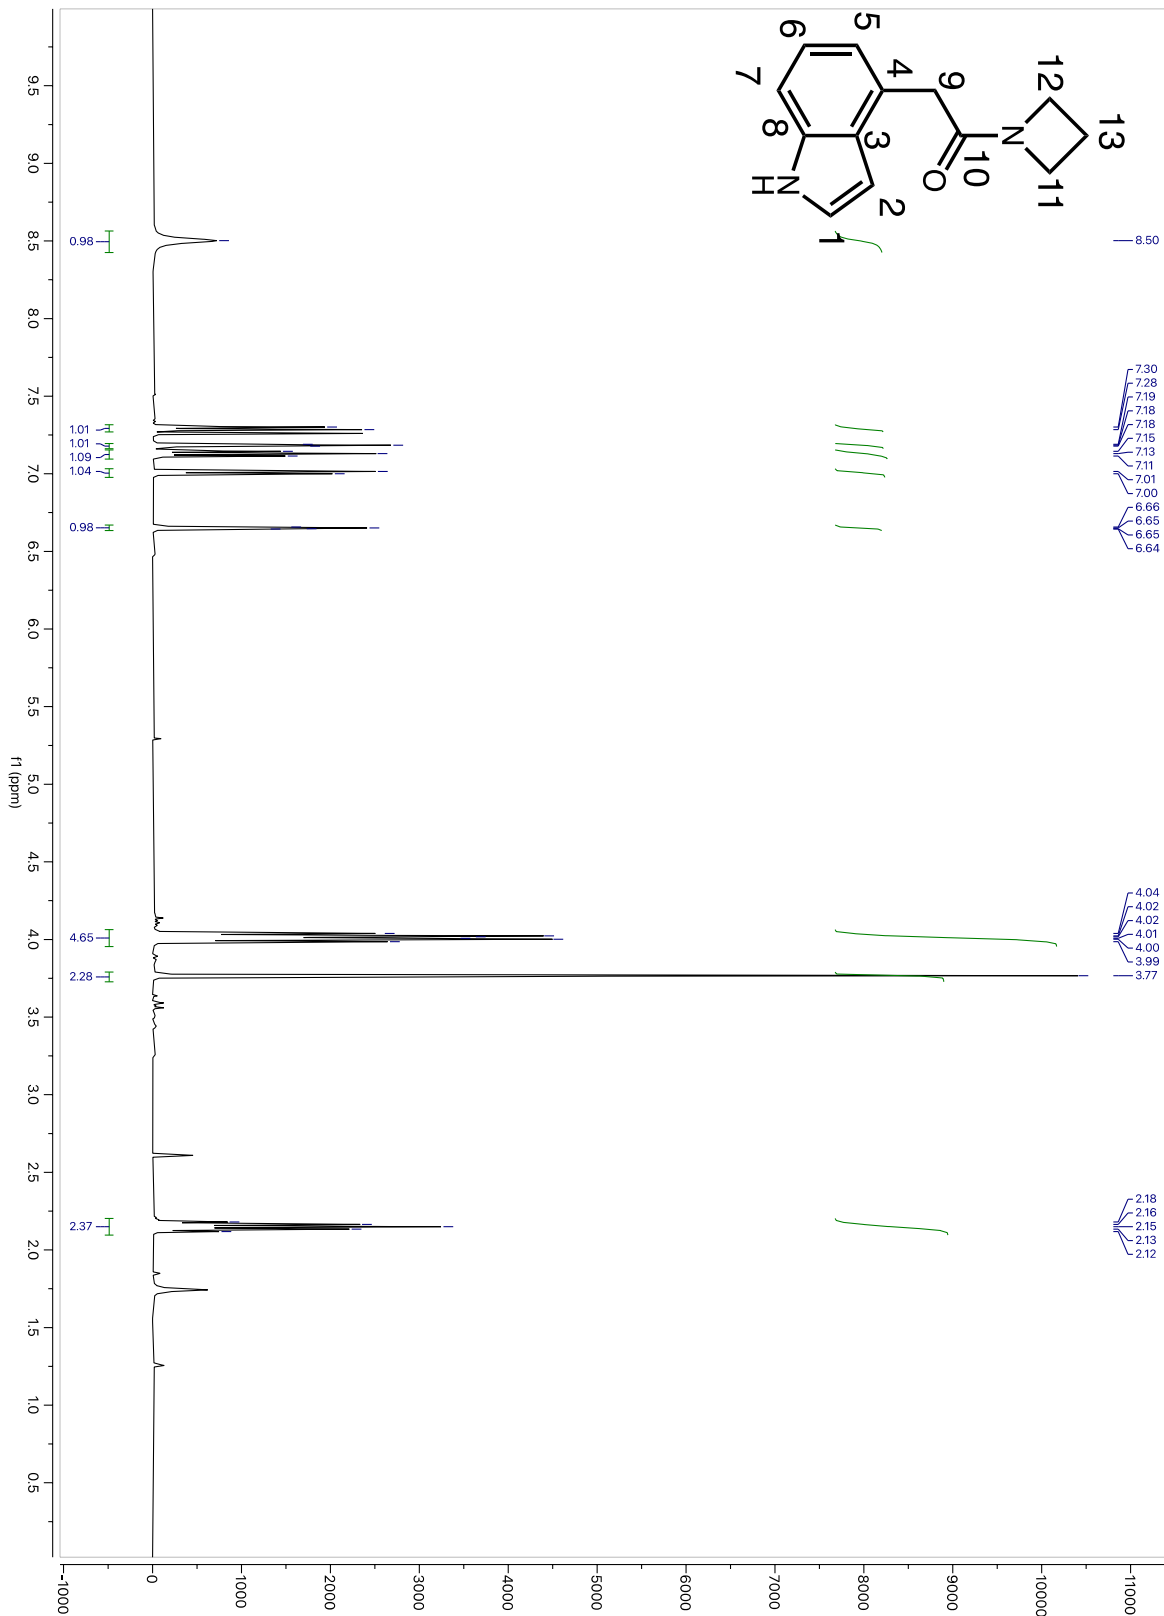

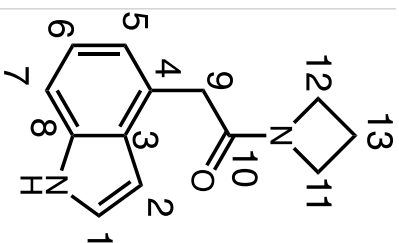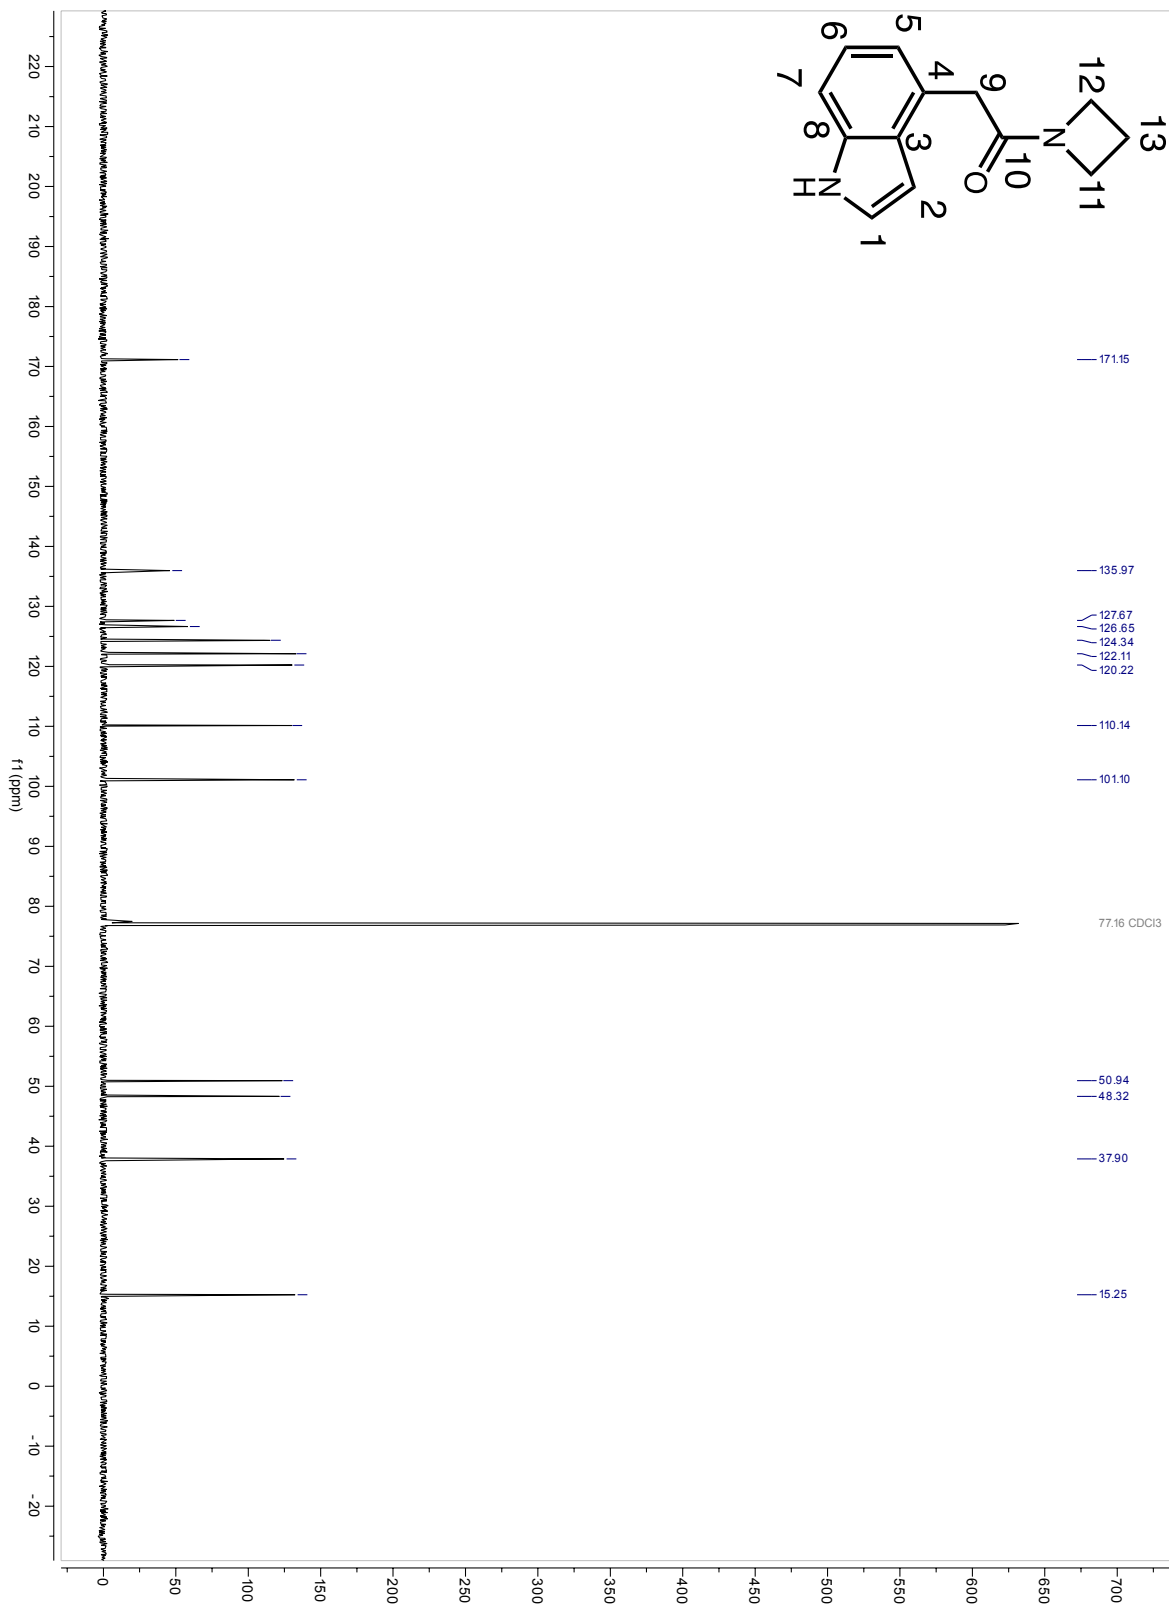

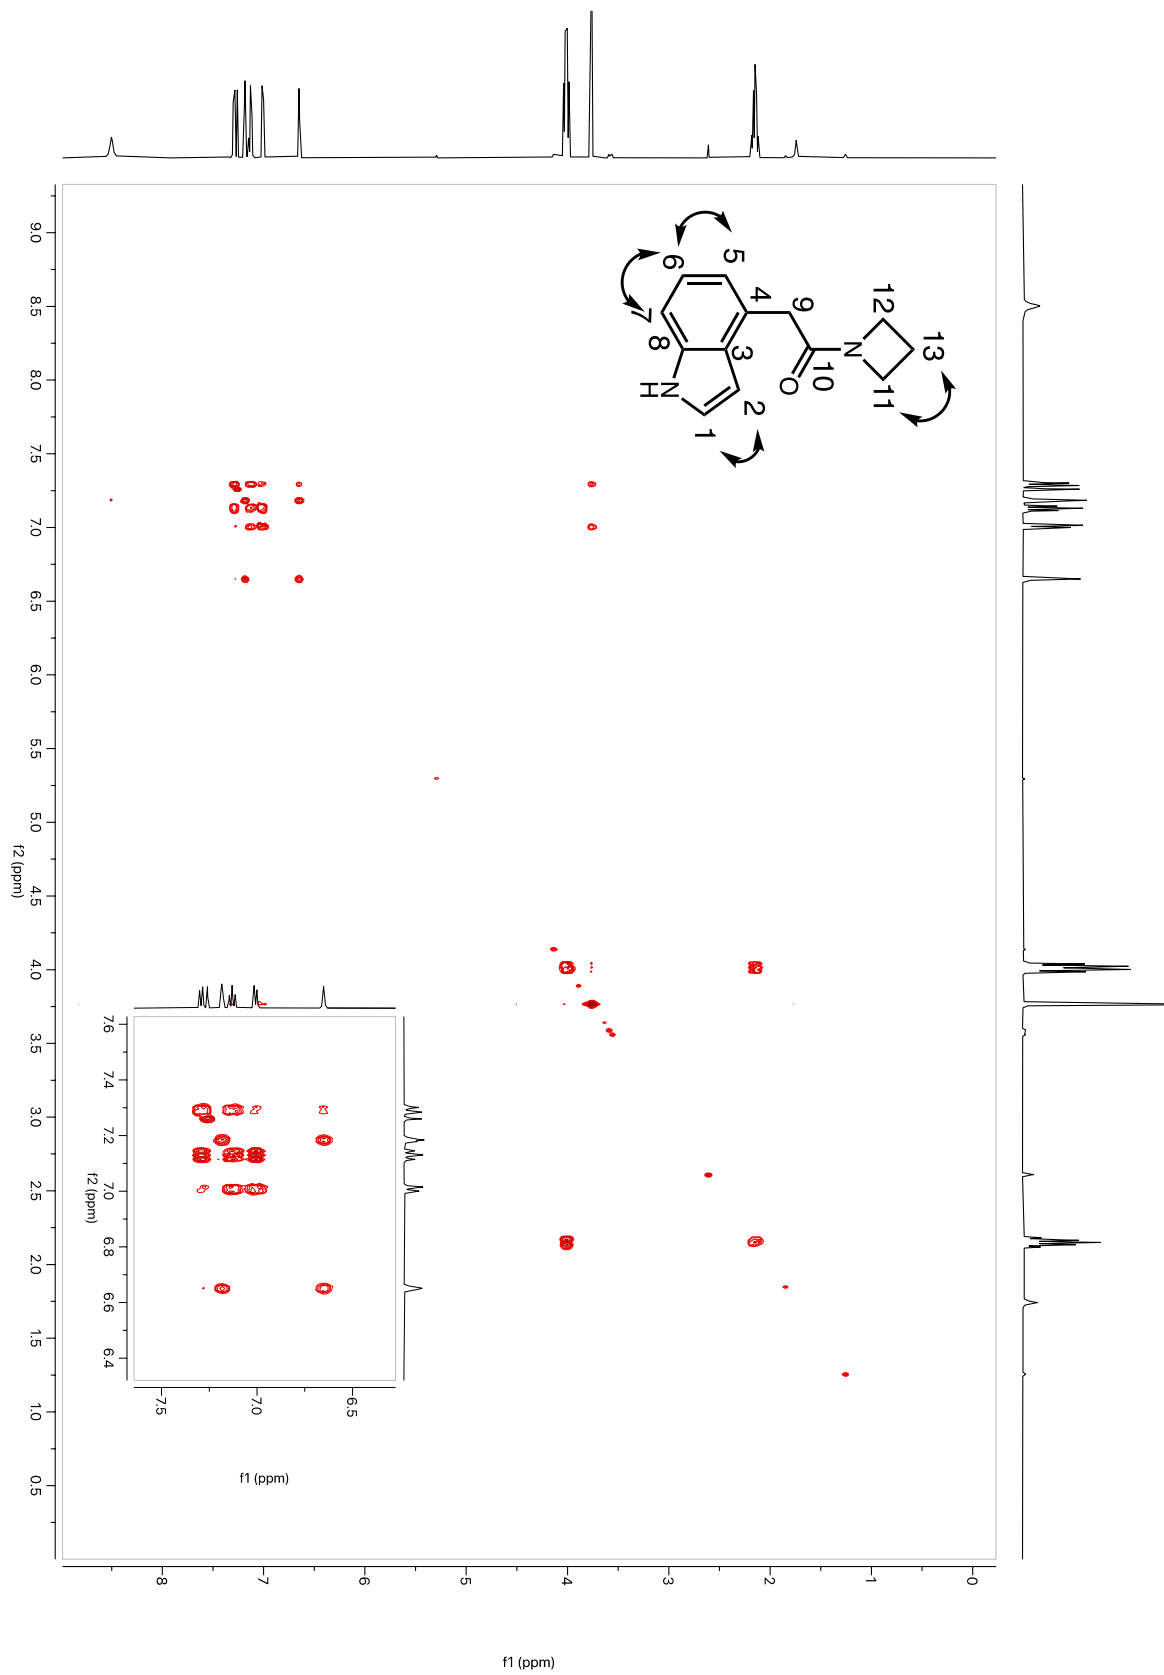

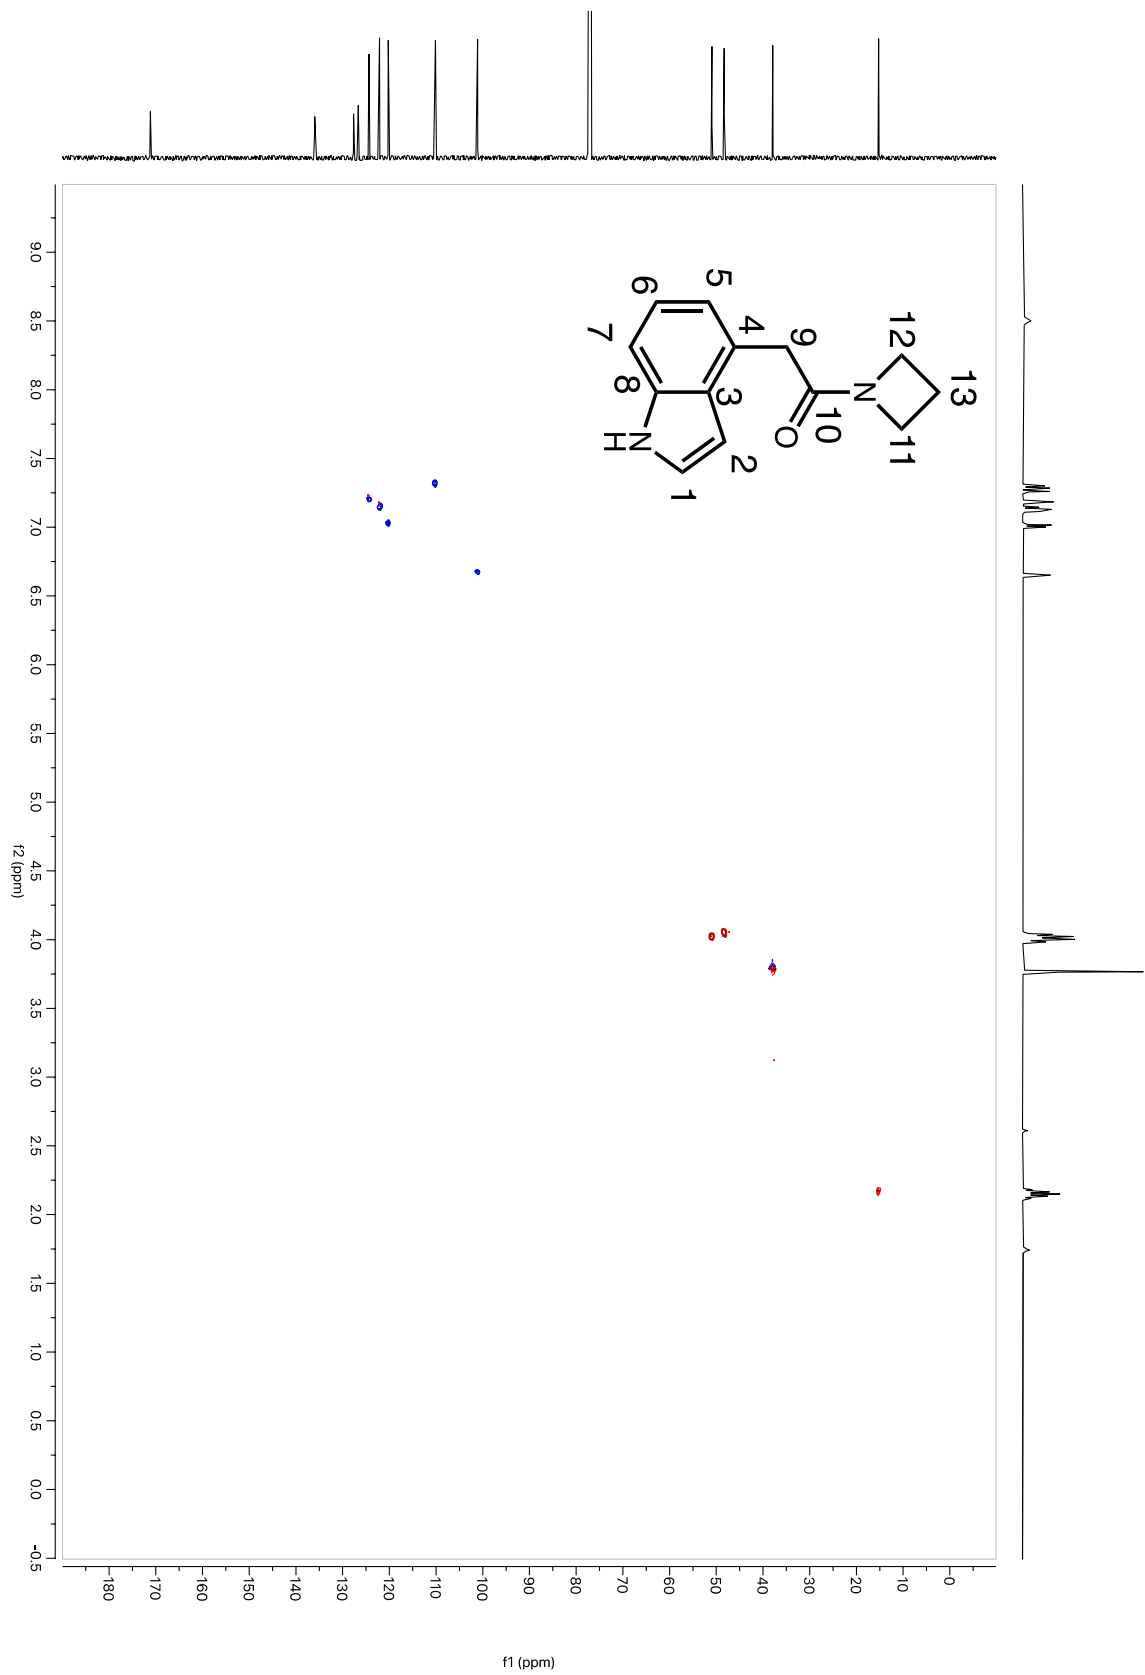



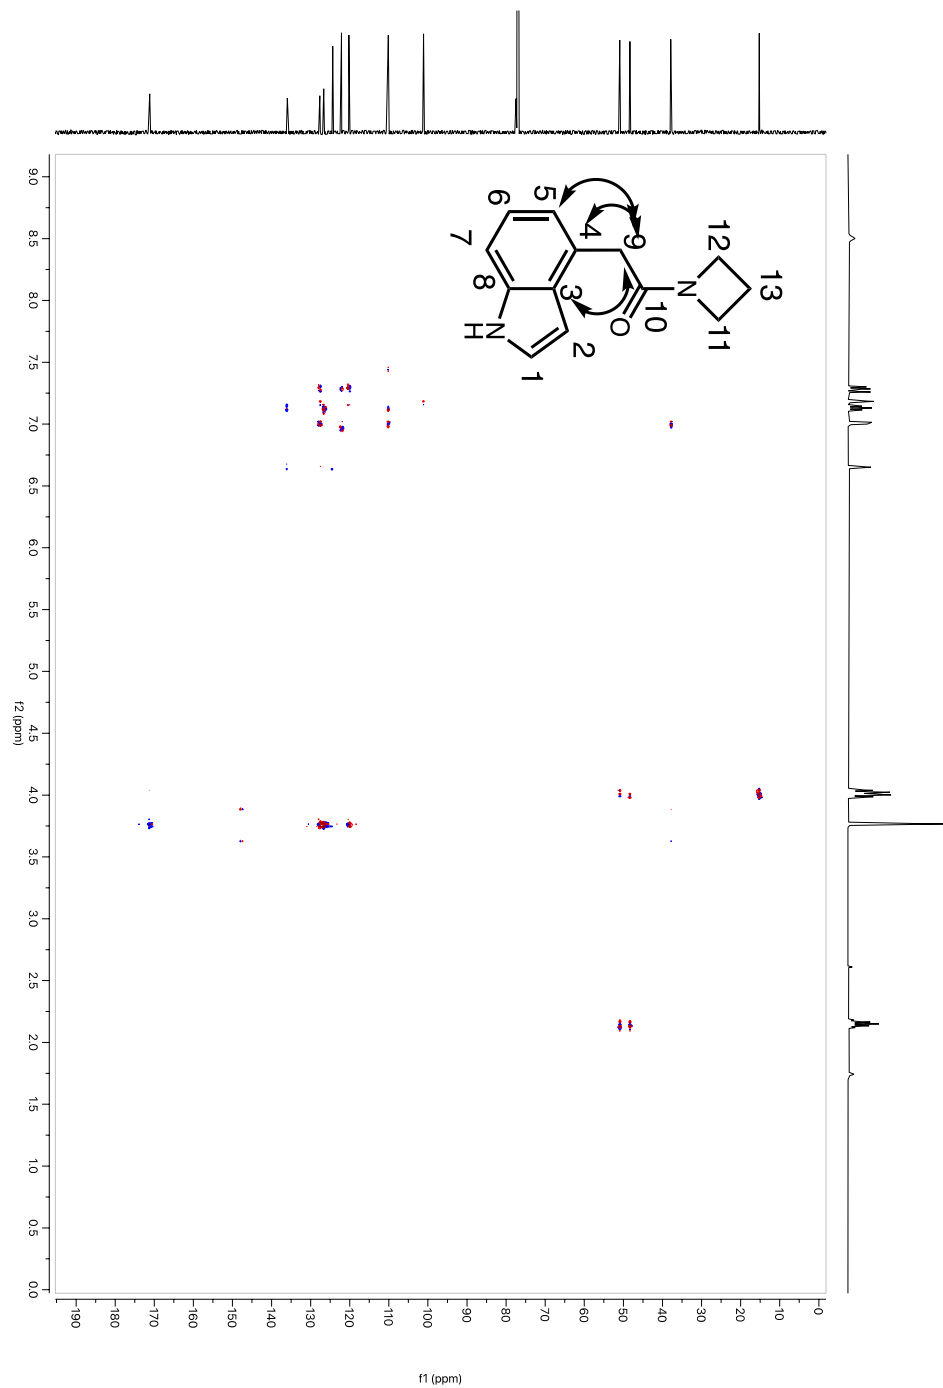

f1 (ppm)

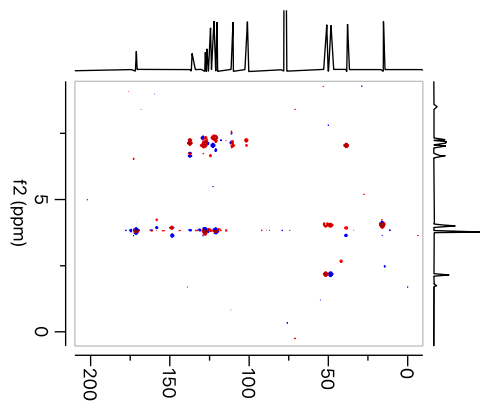

f1 (ppm)

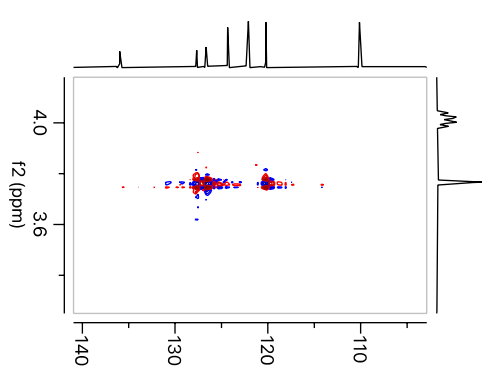

f1 (ppm)

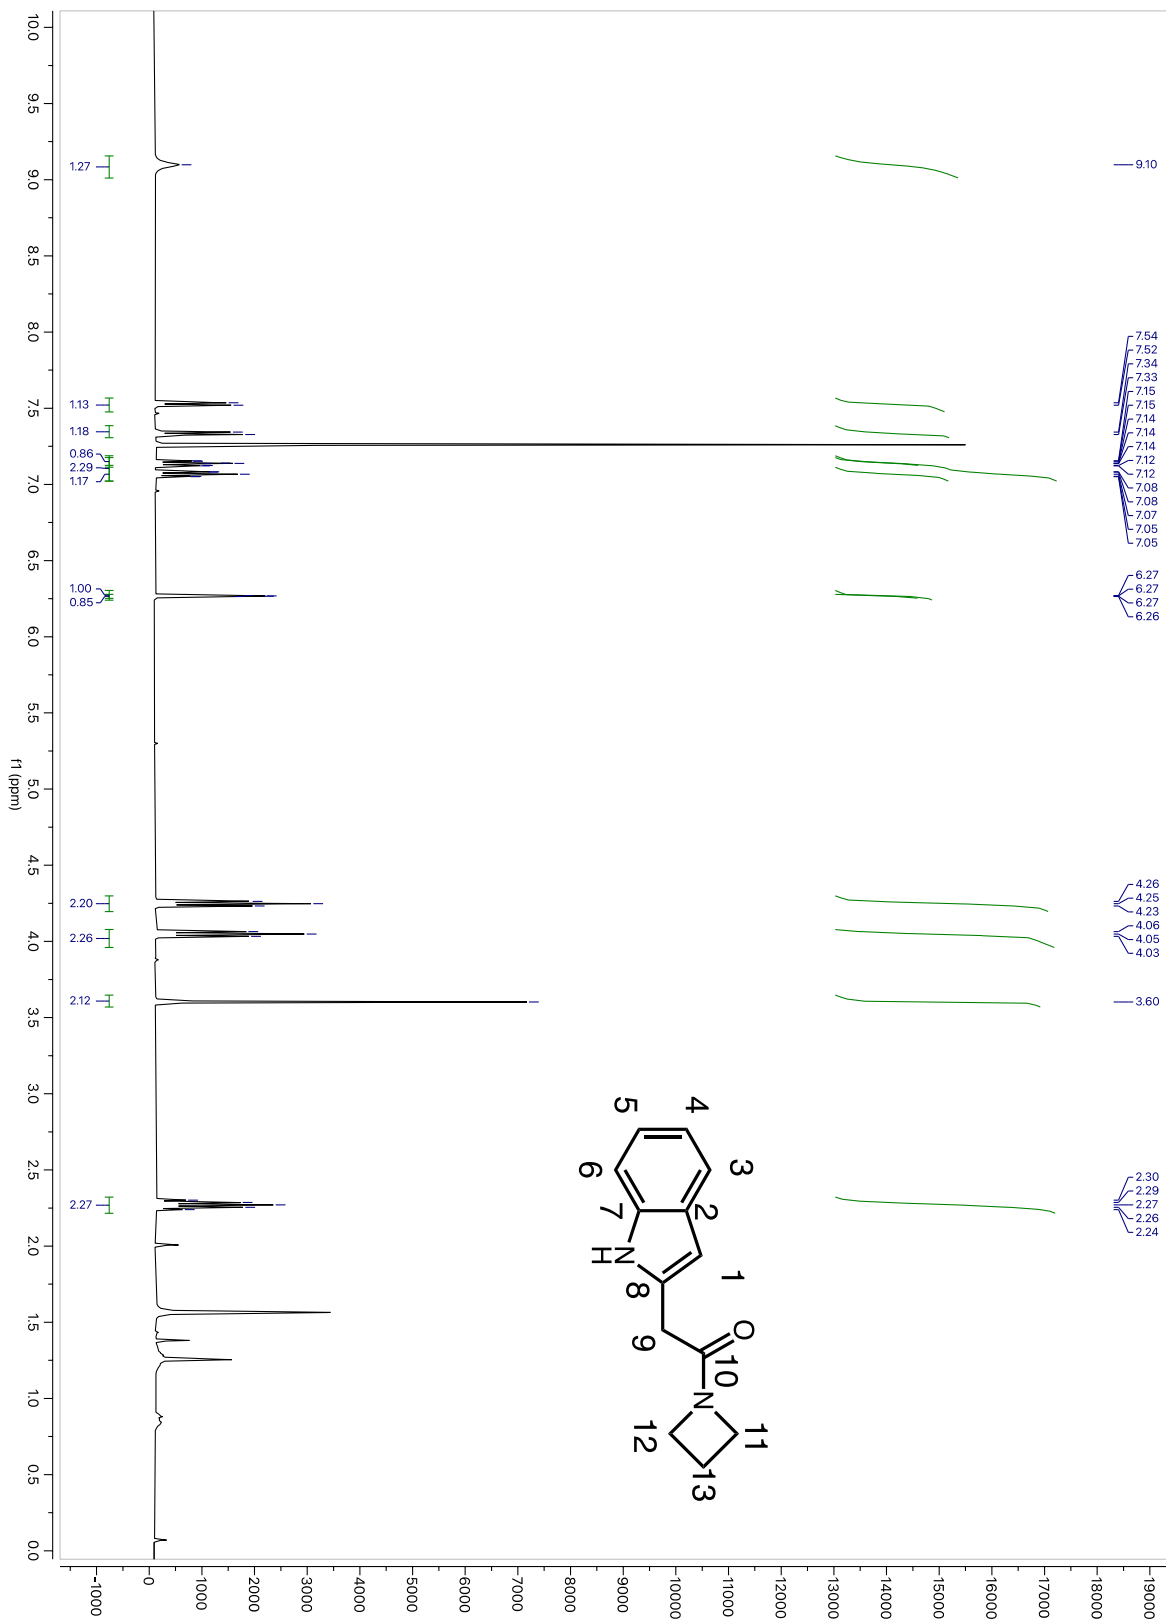

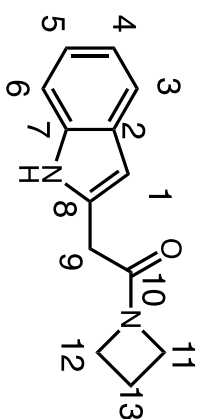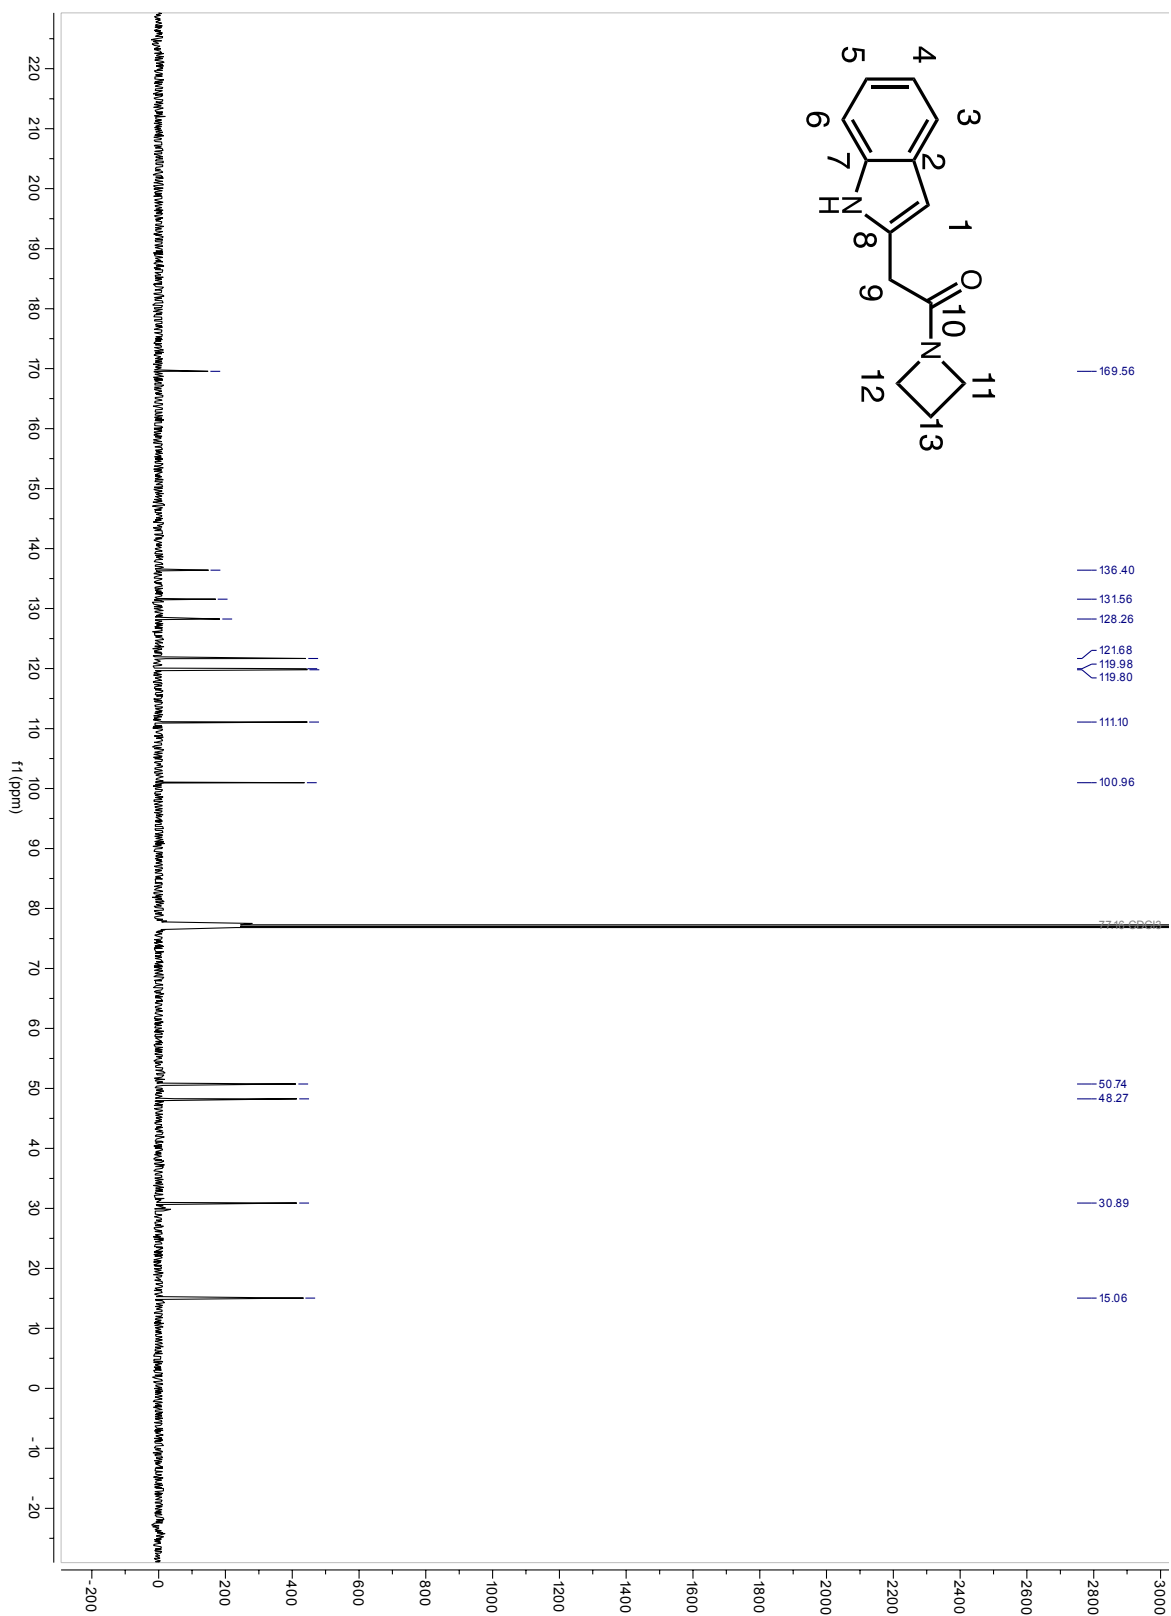

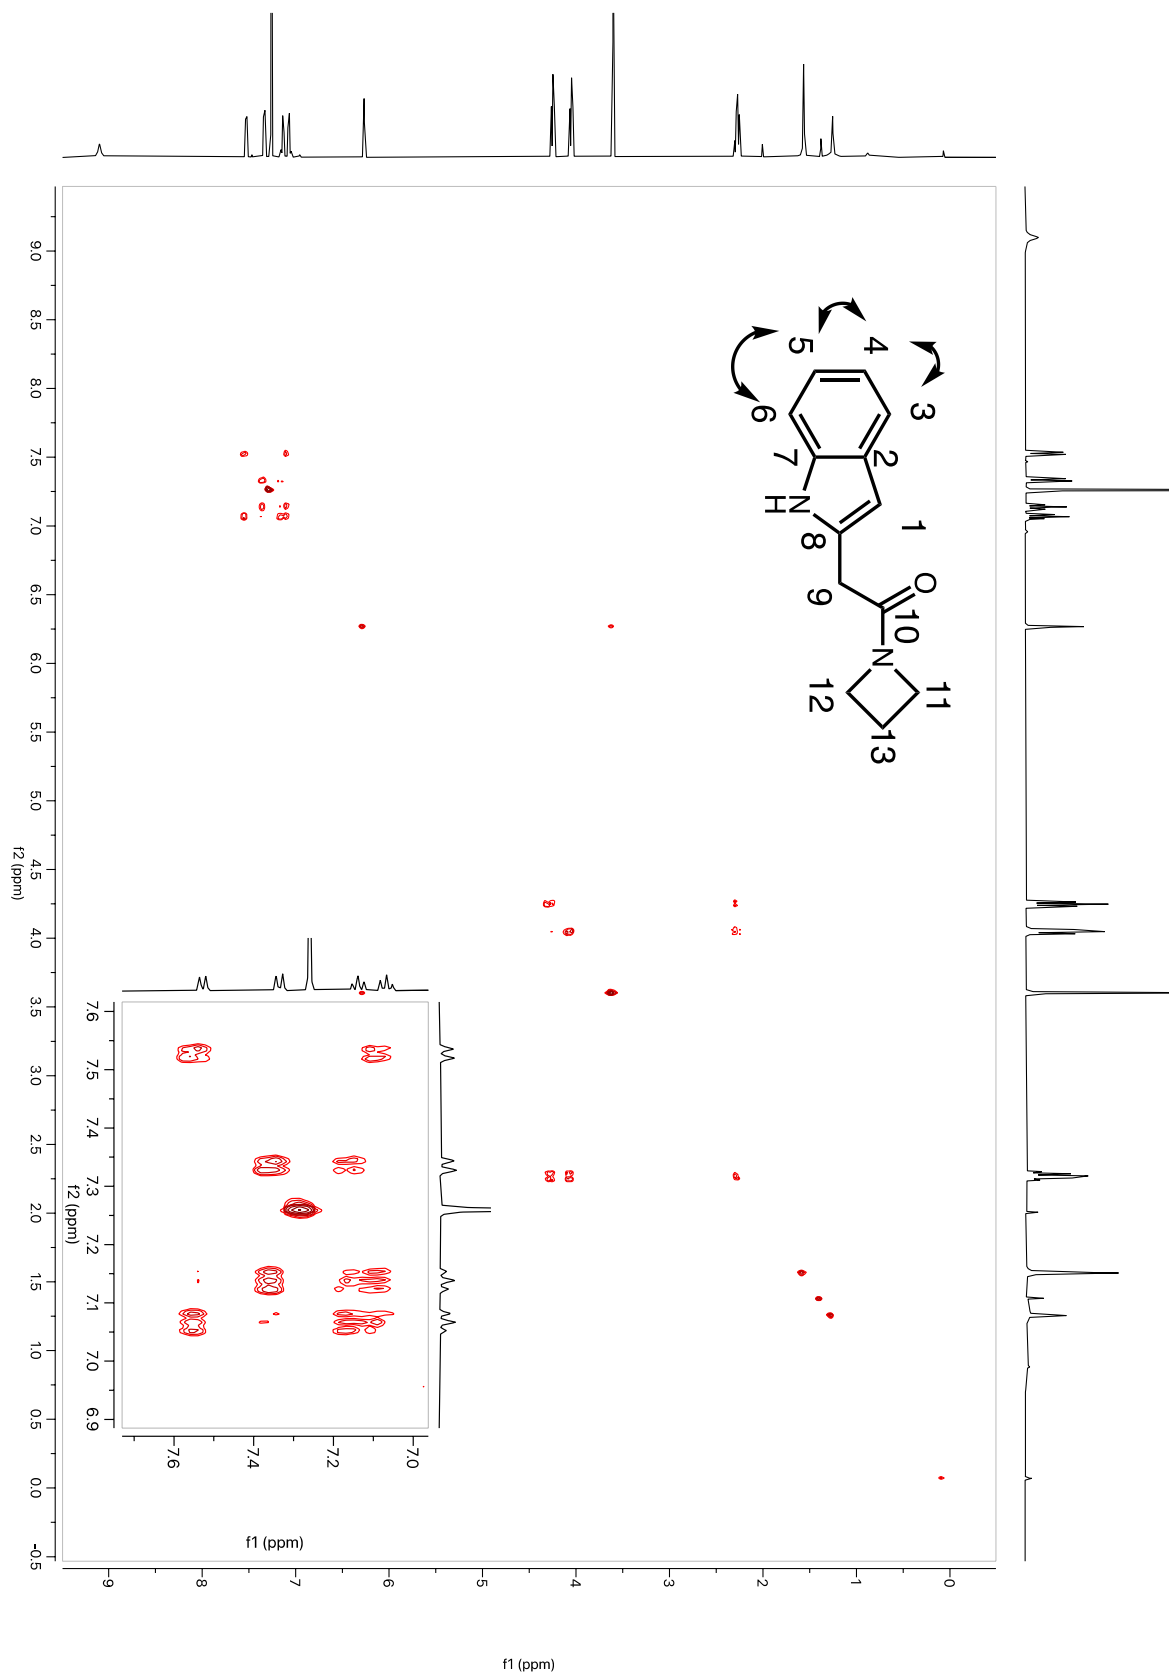

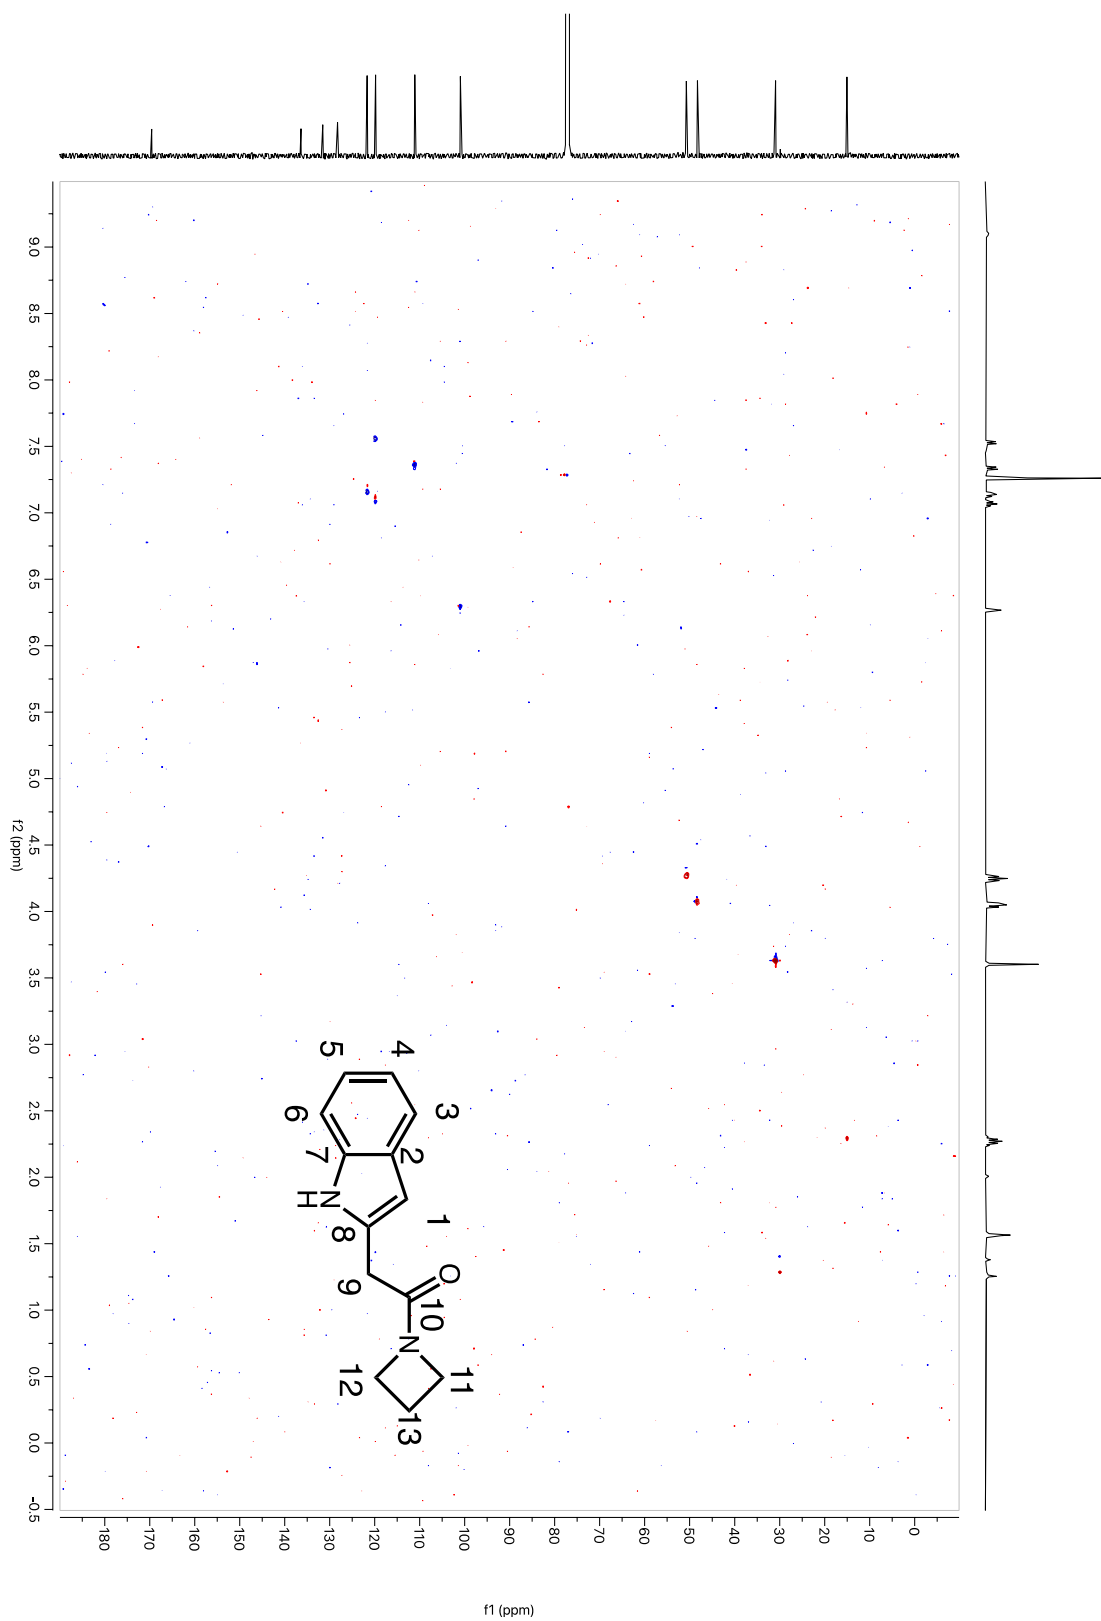

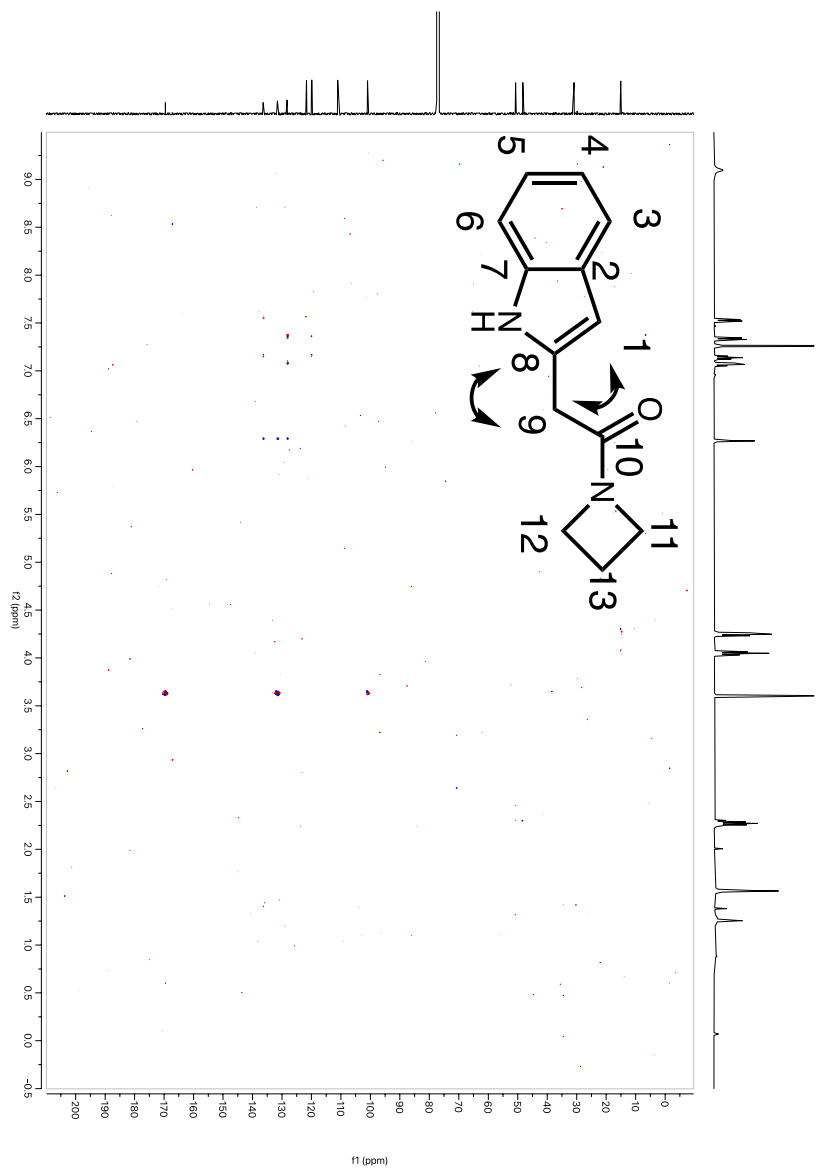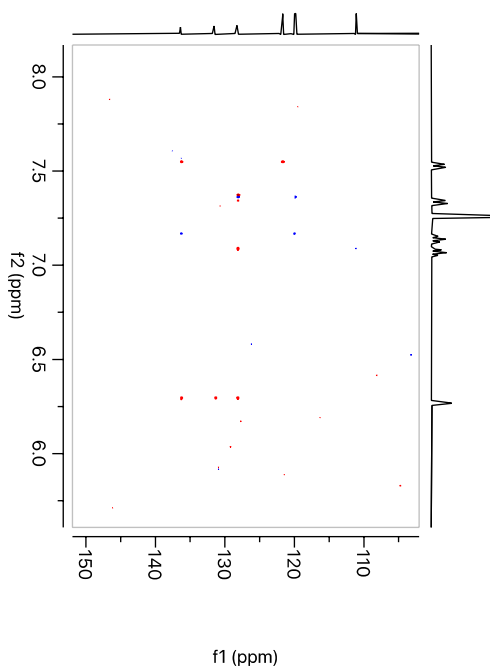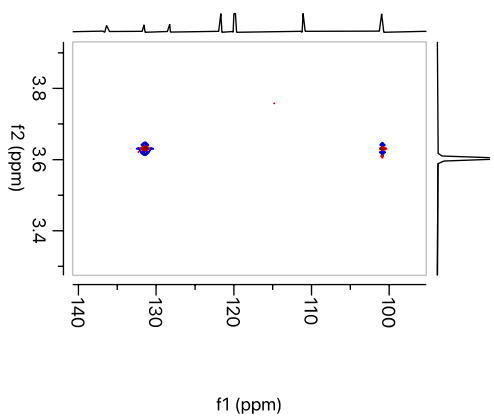

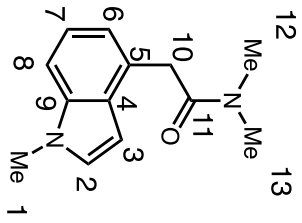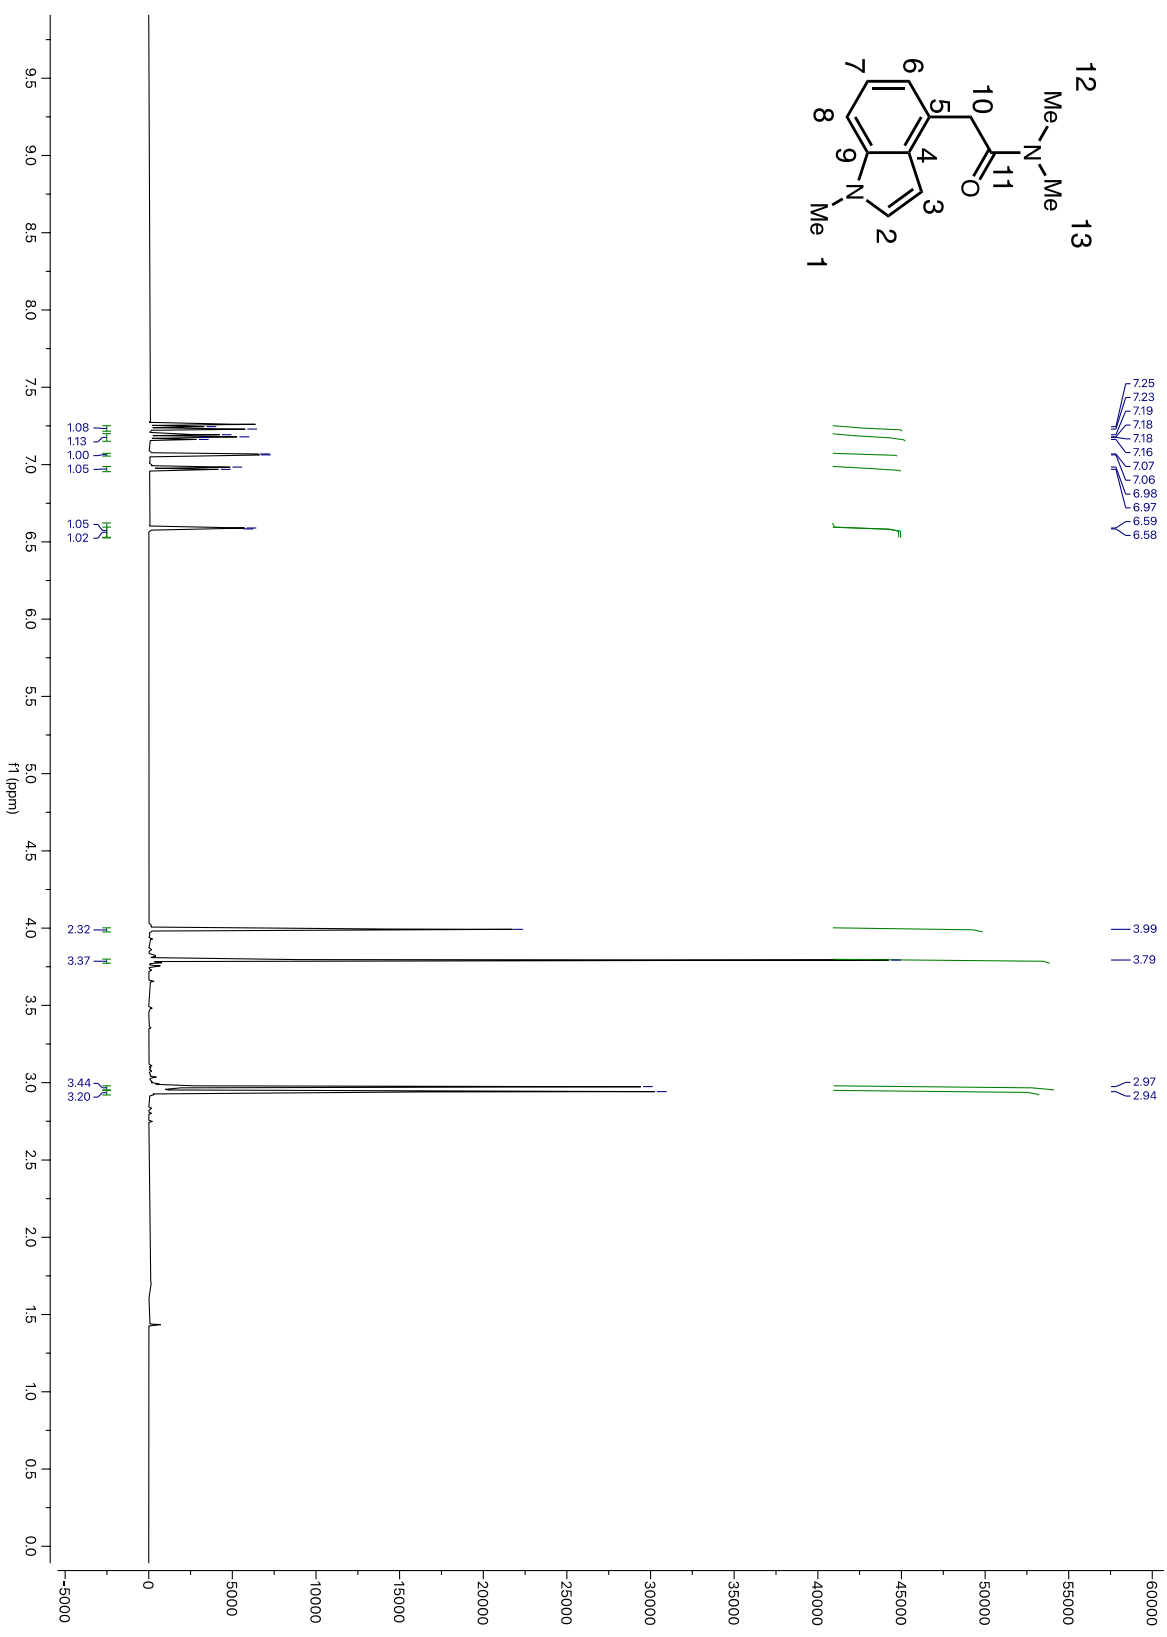

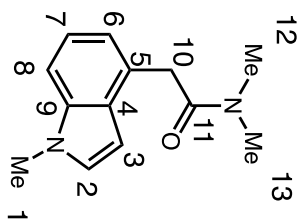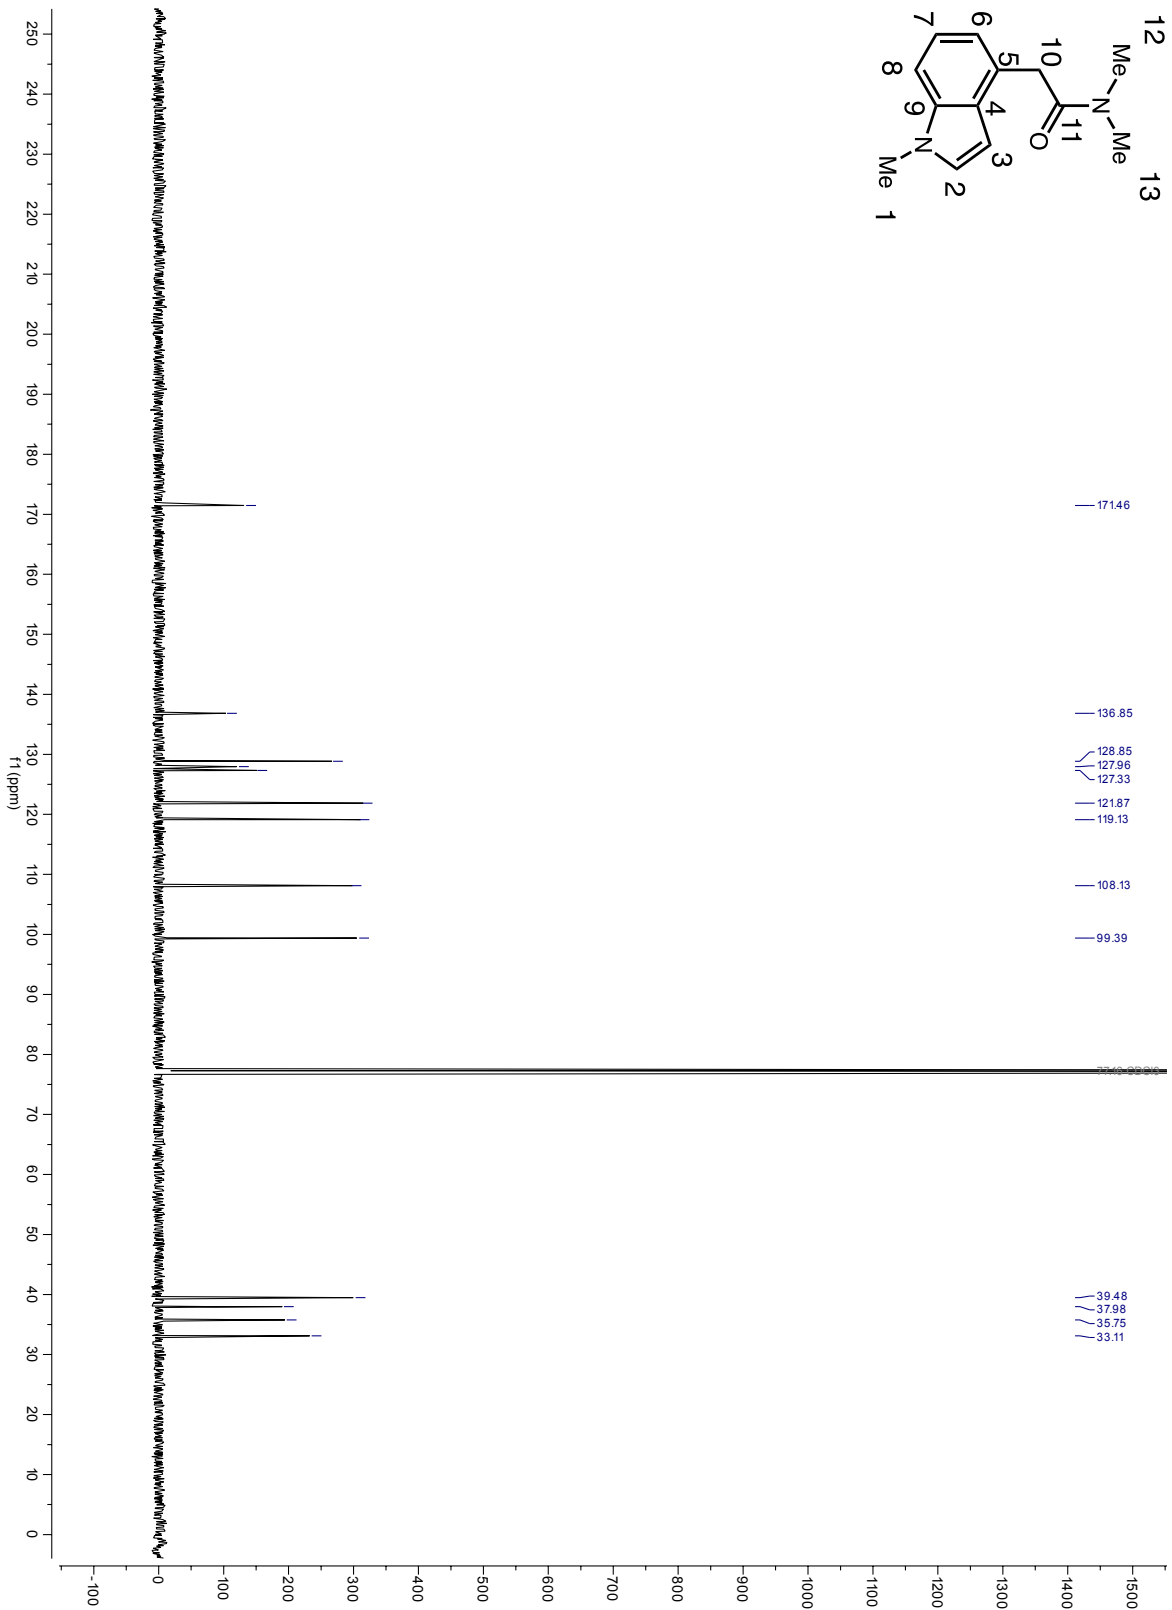



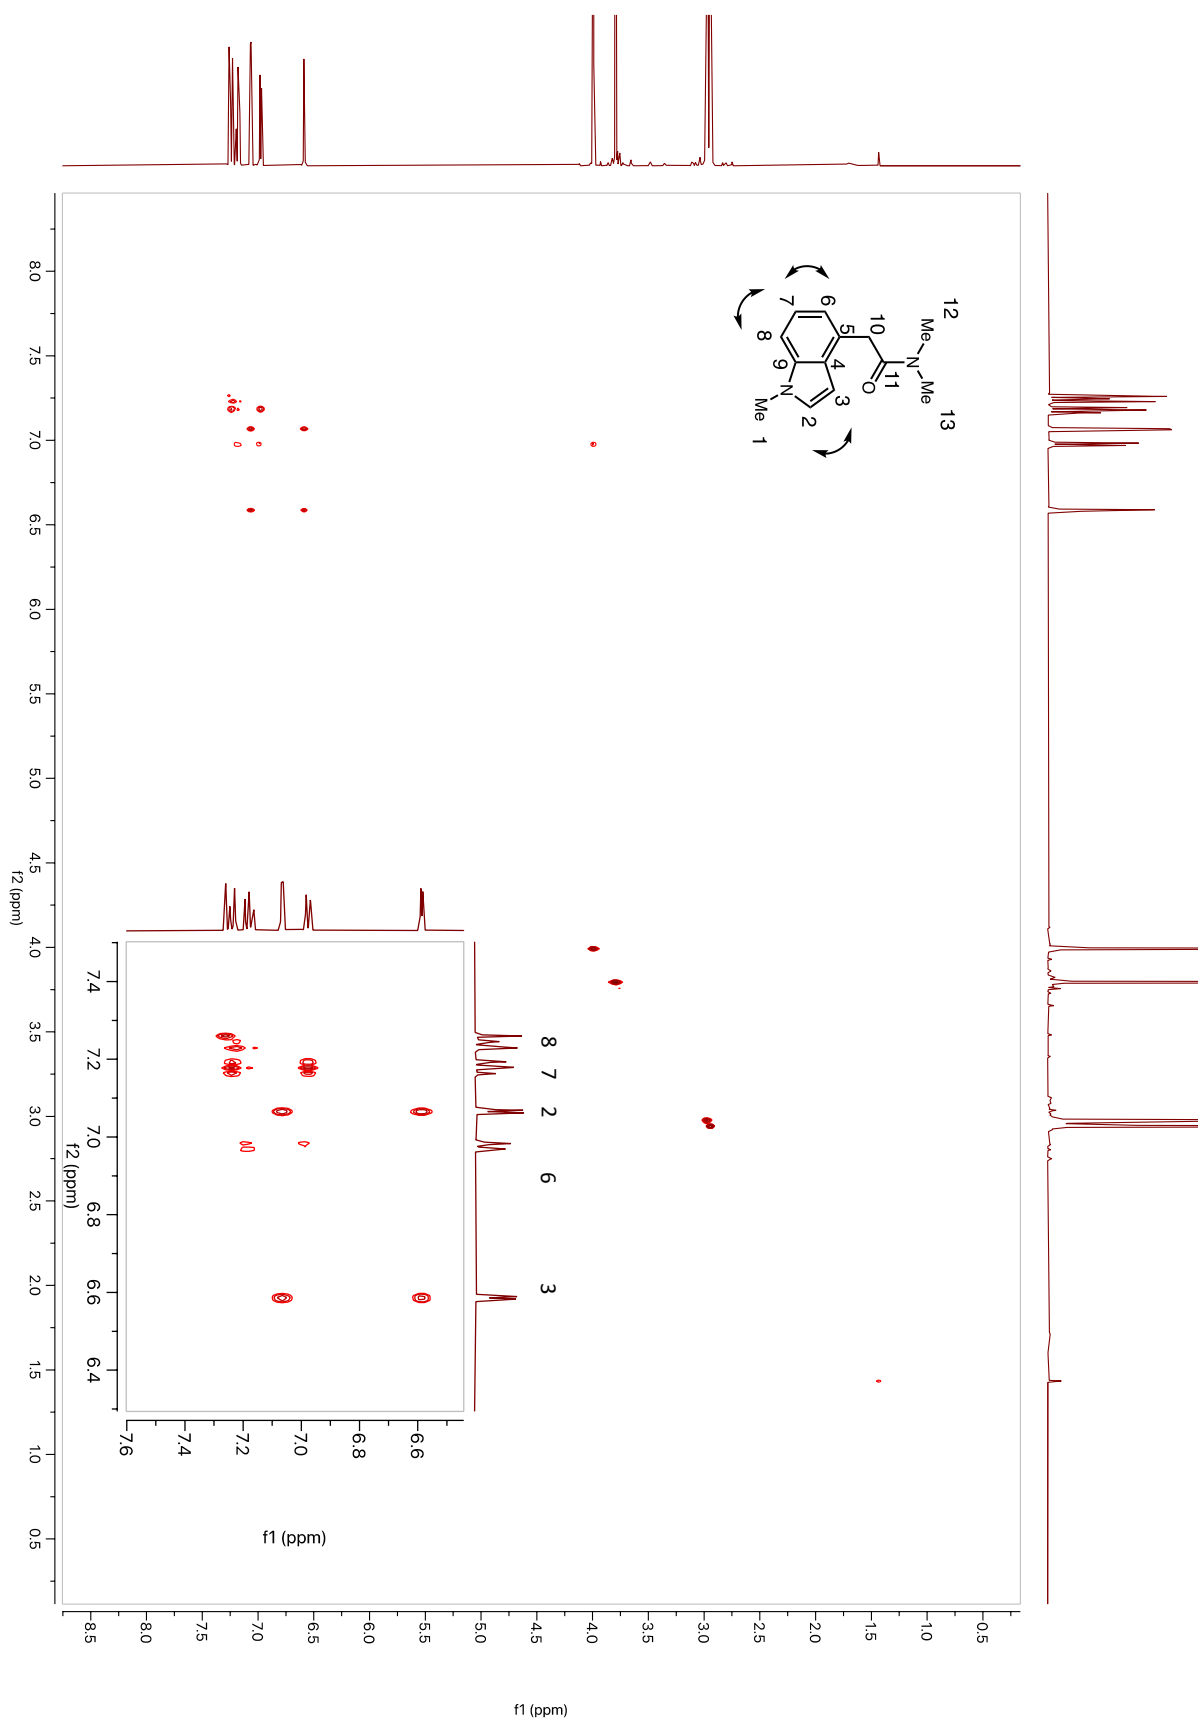

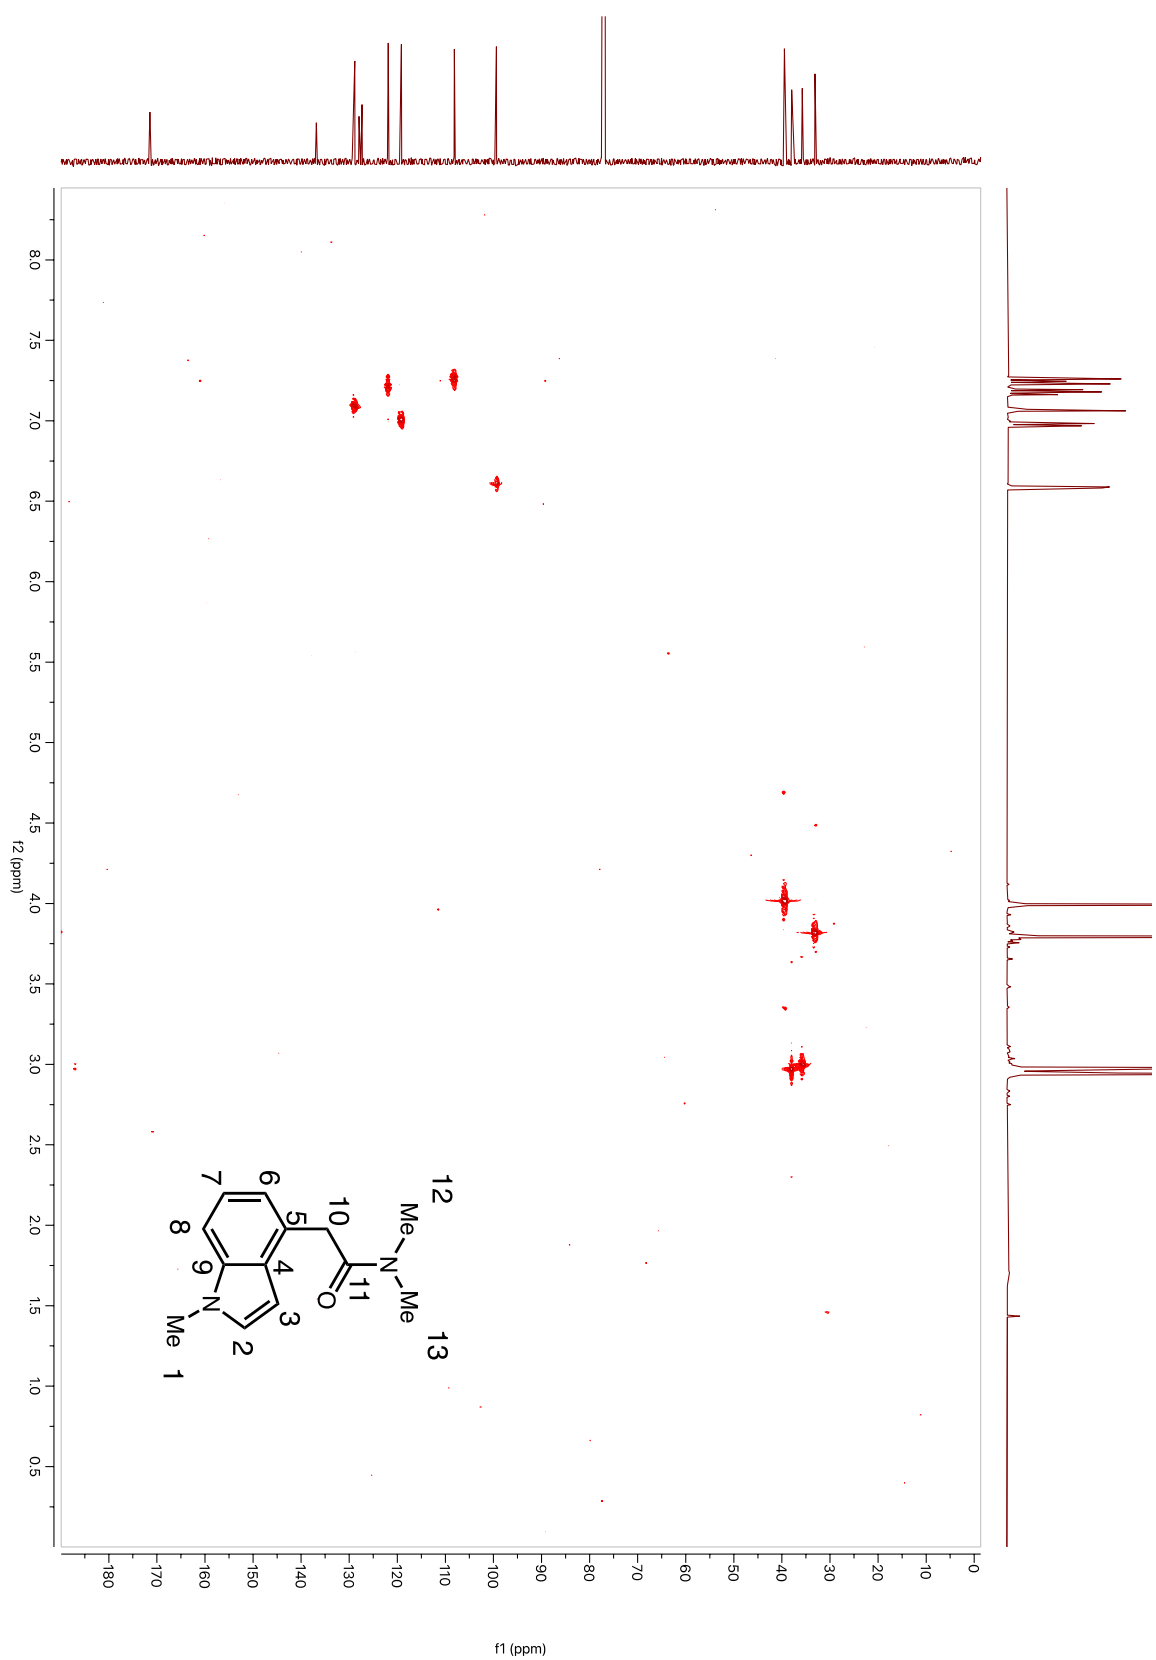

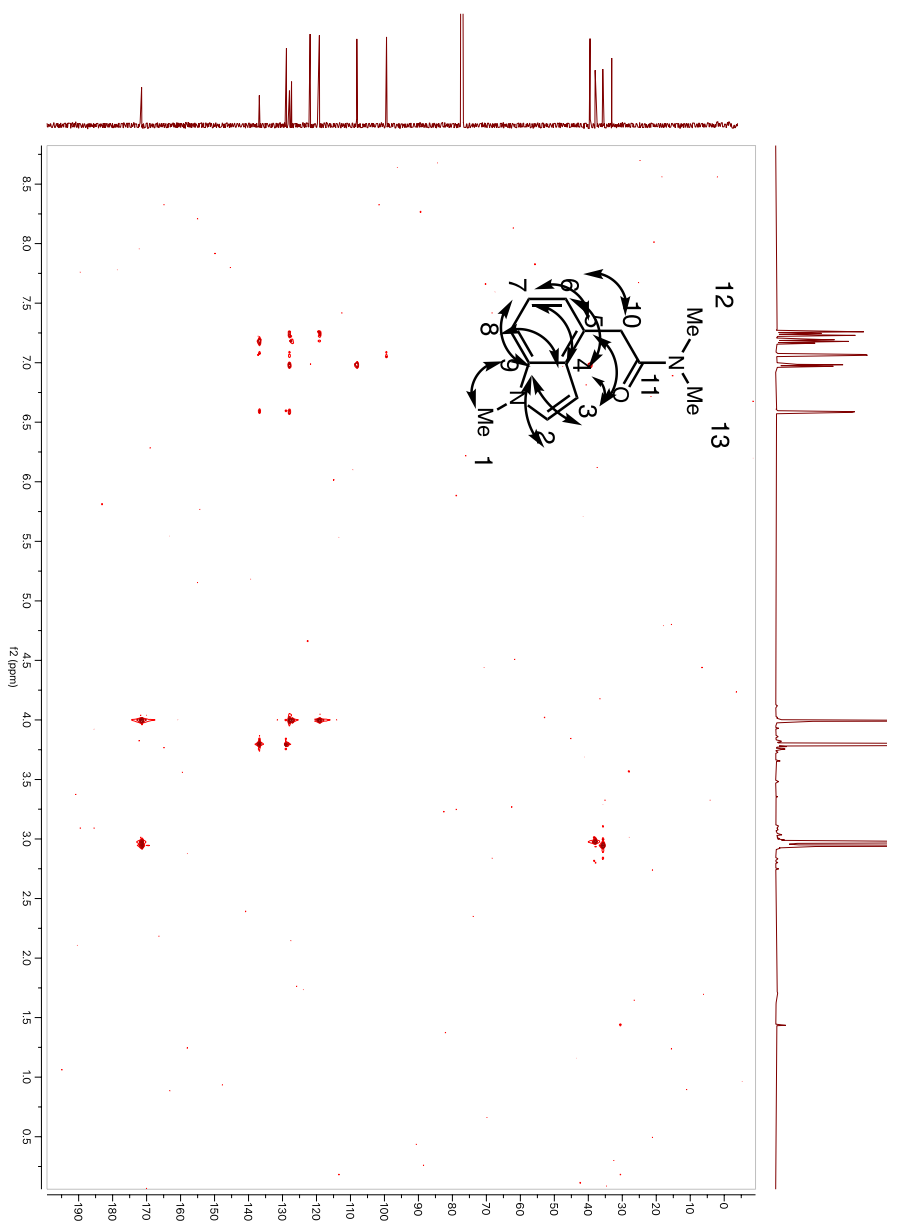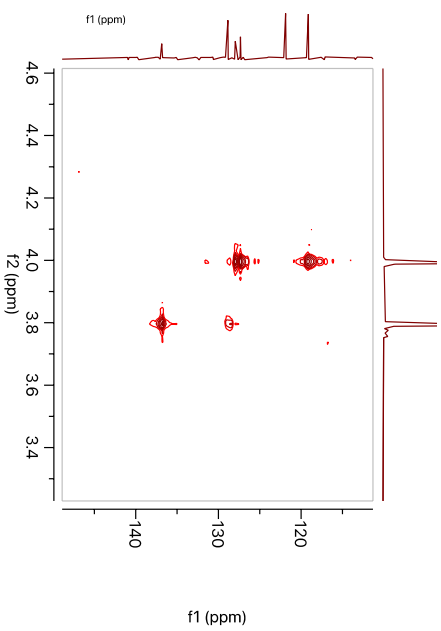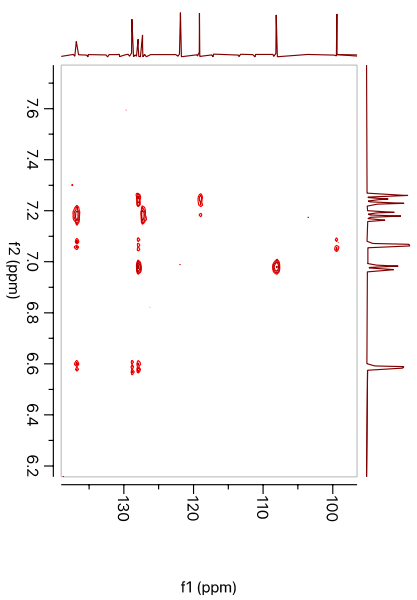

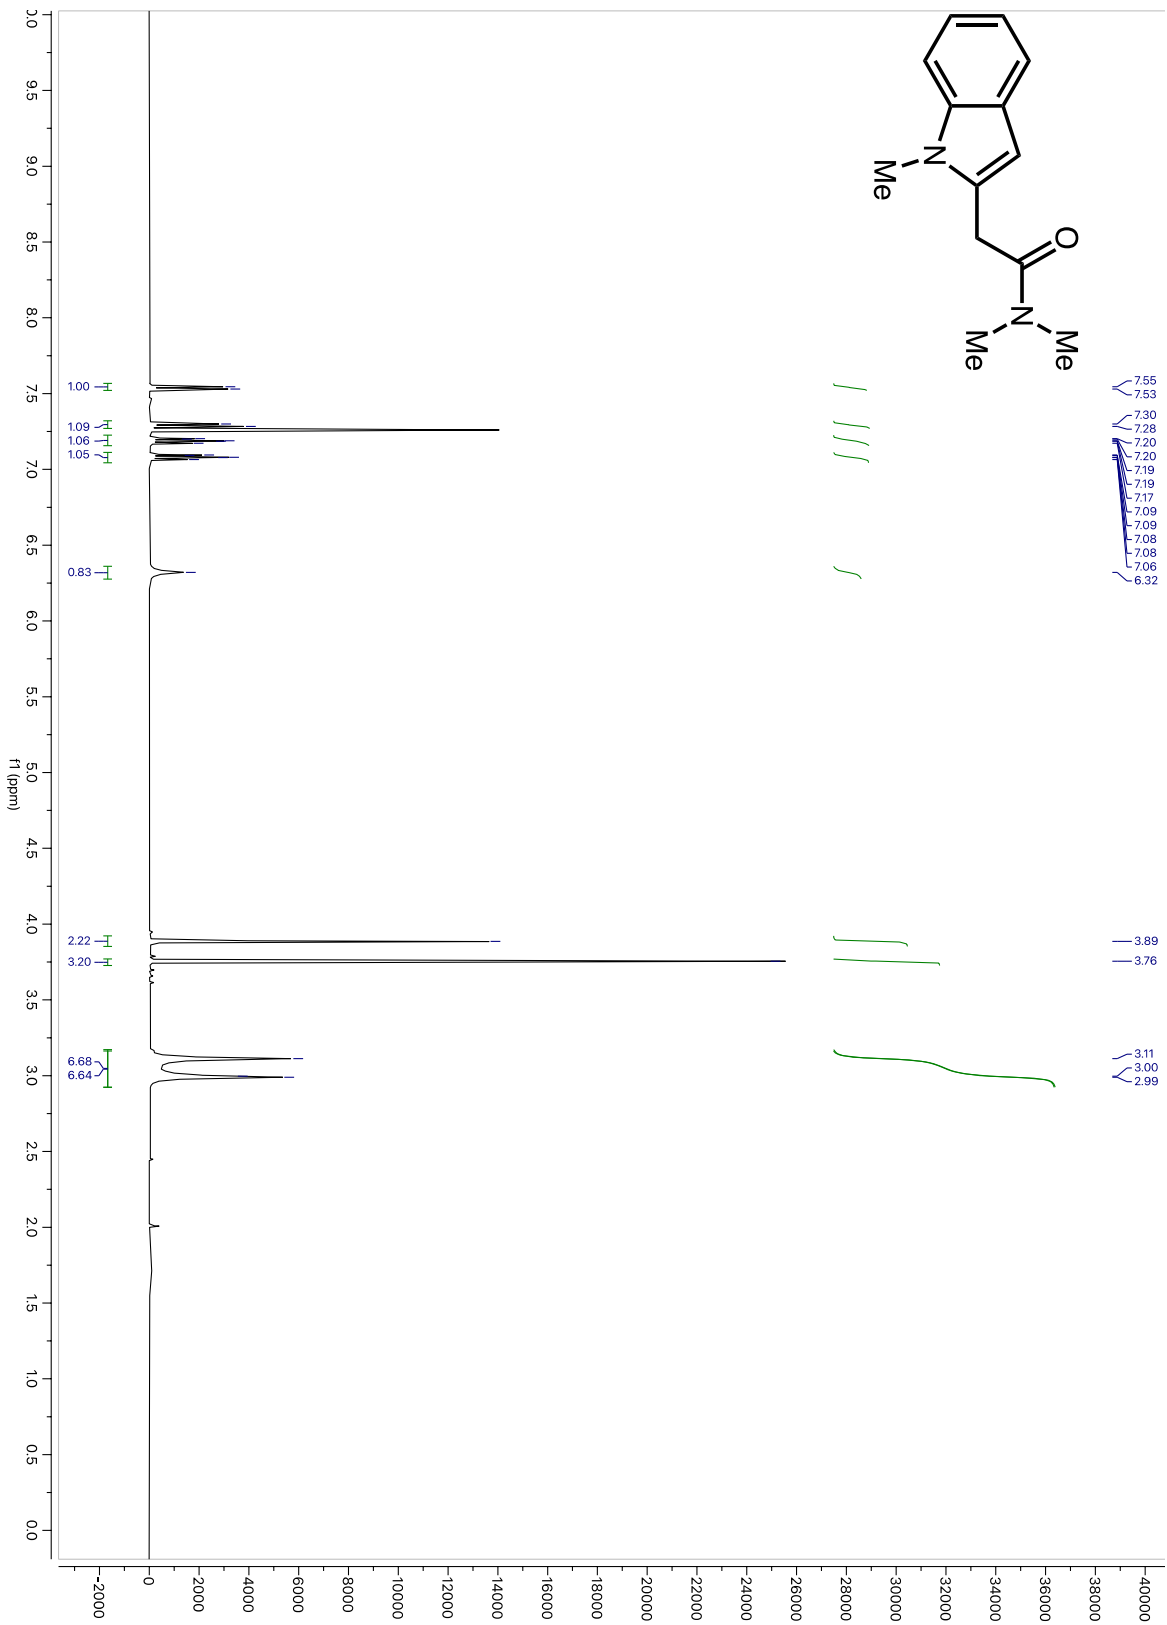

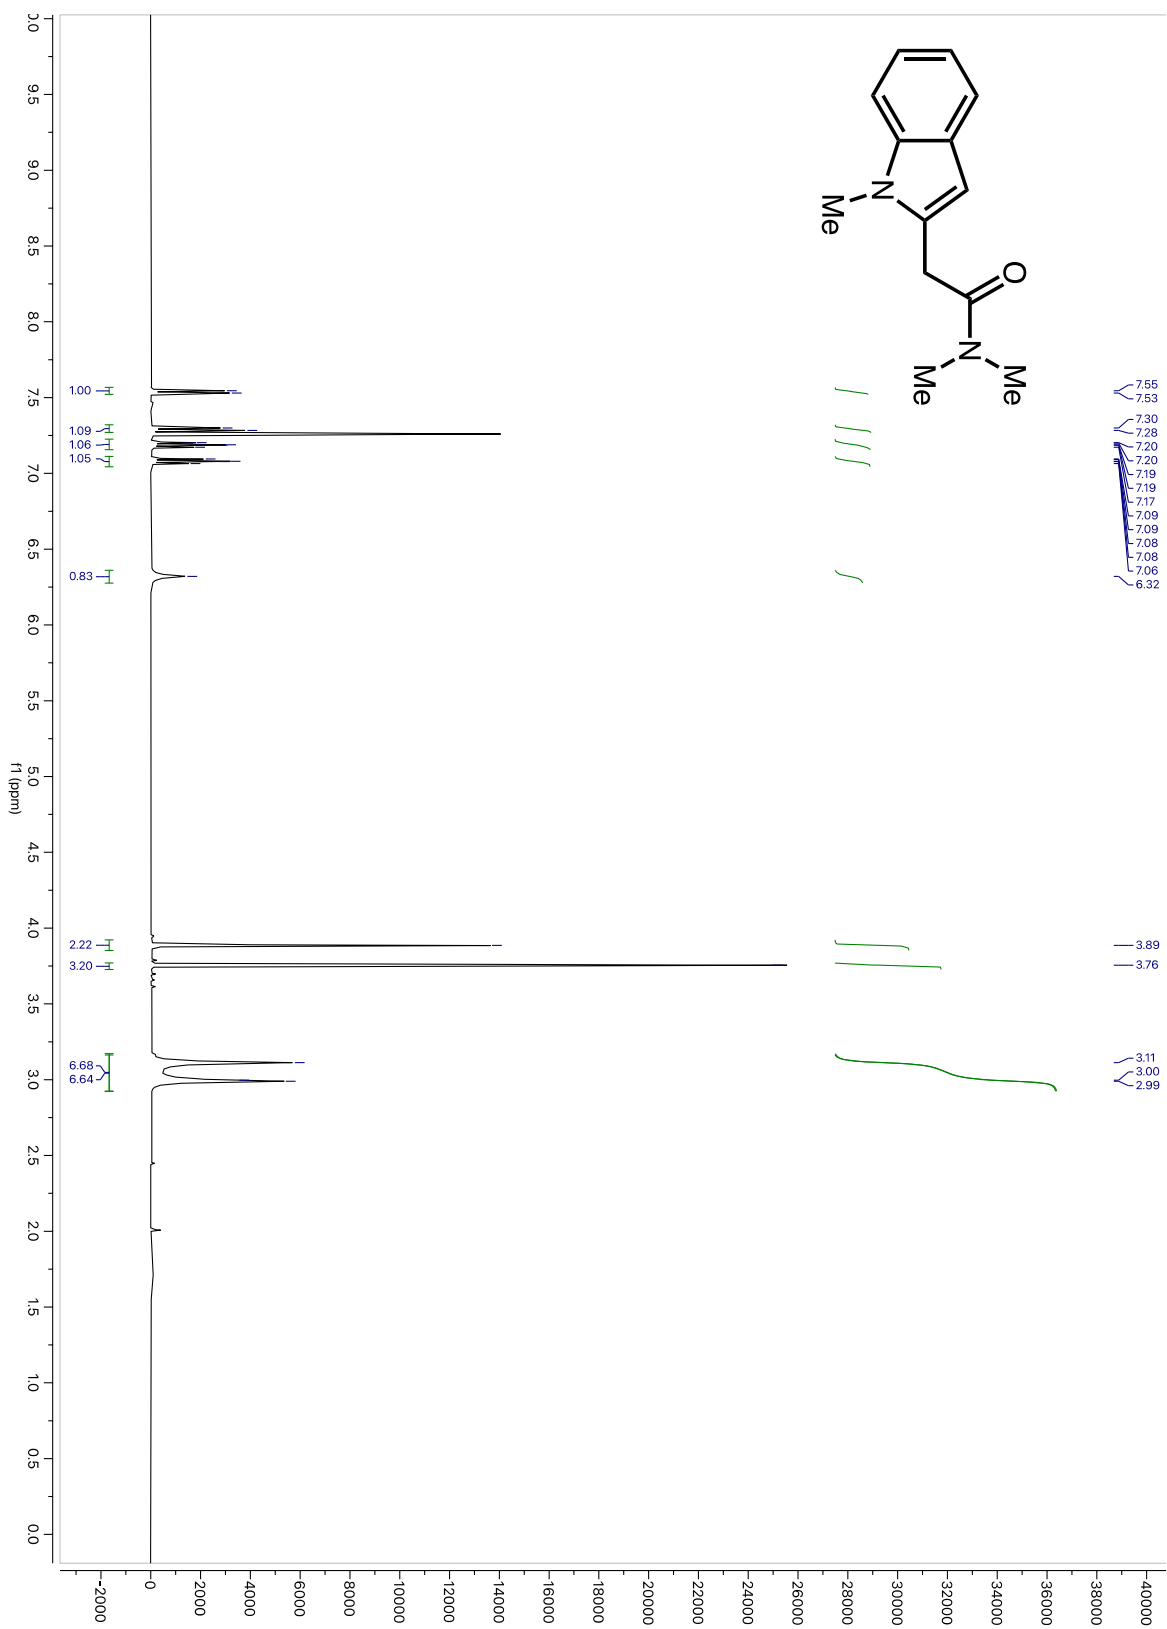

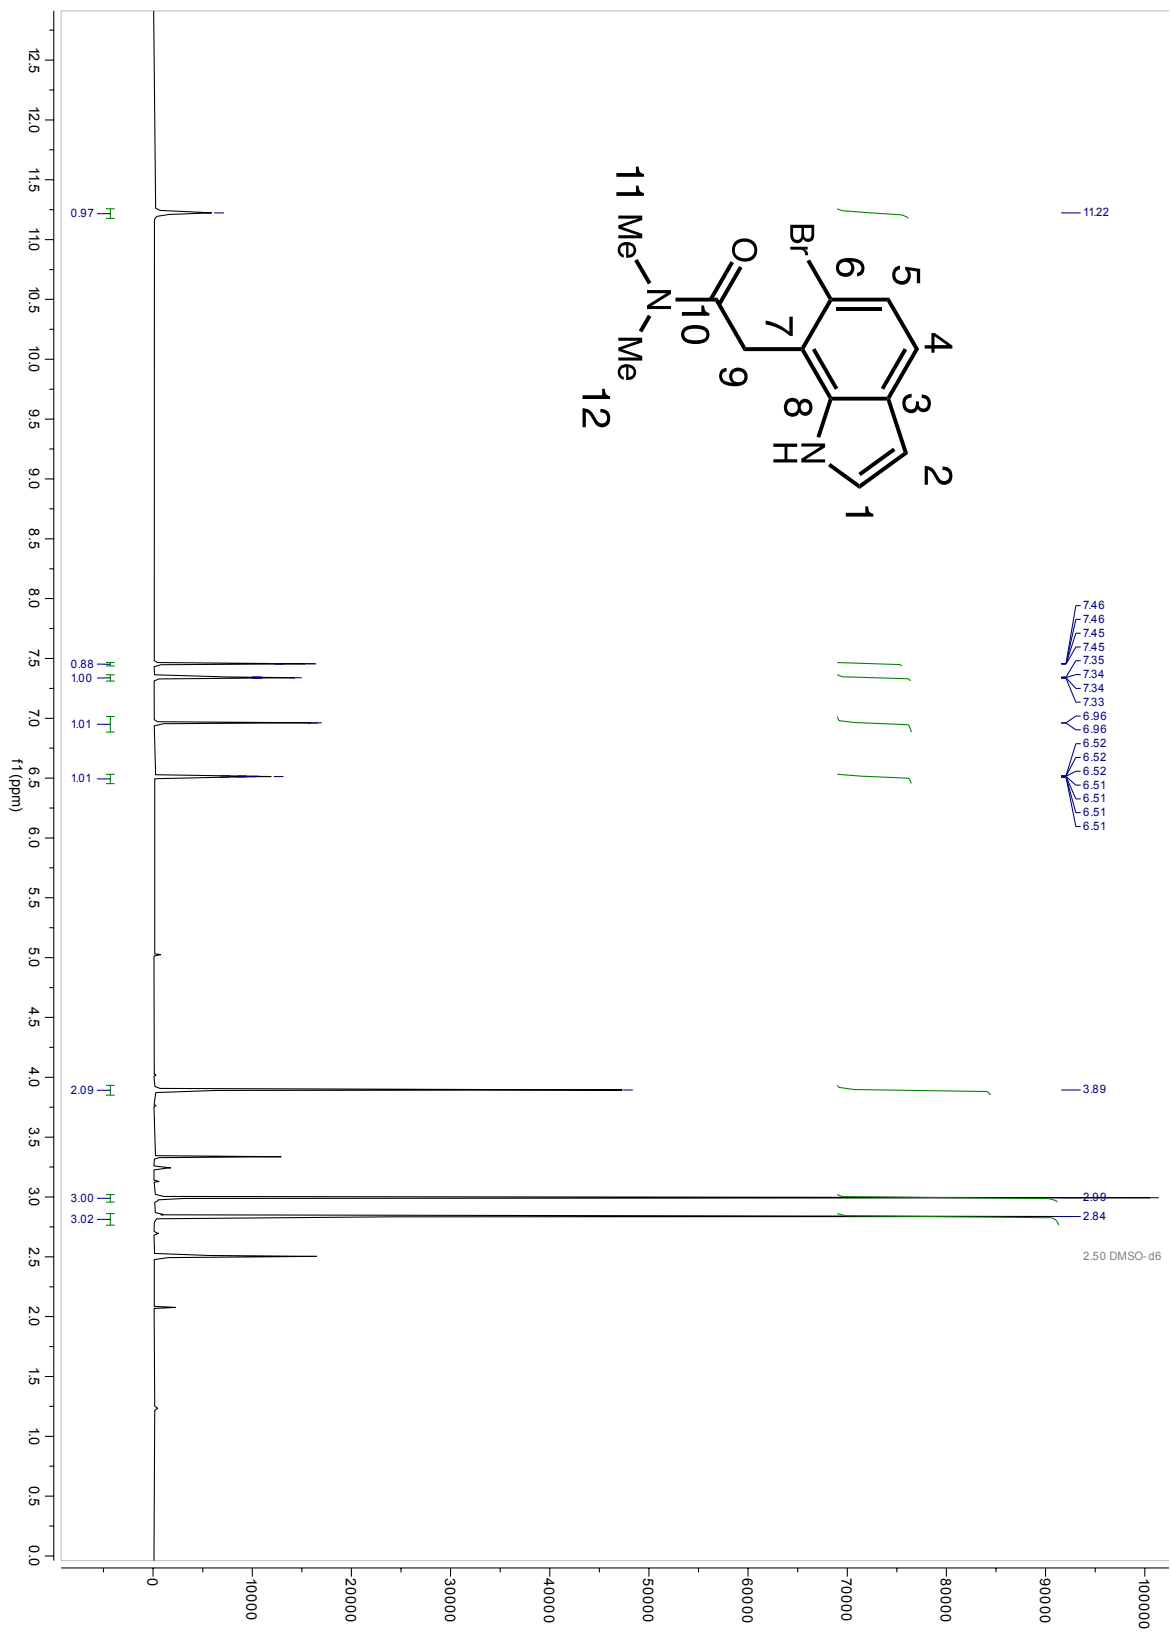

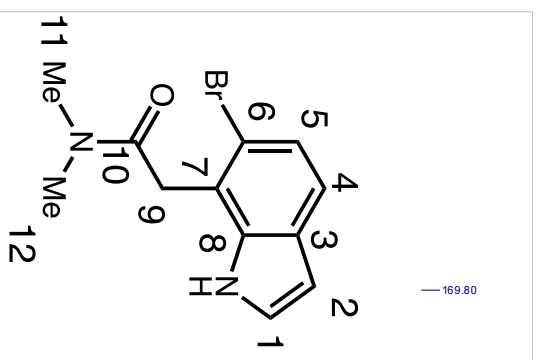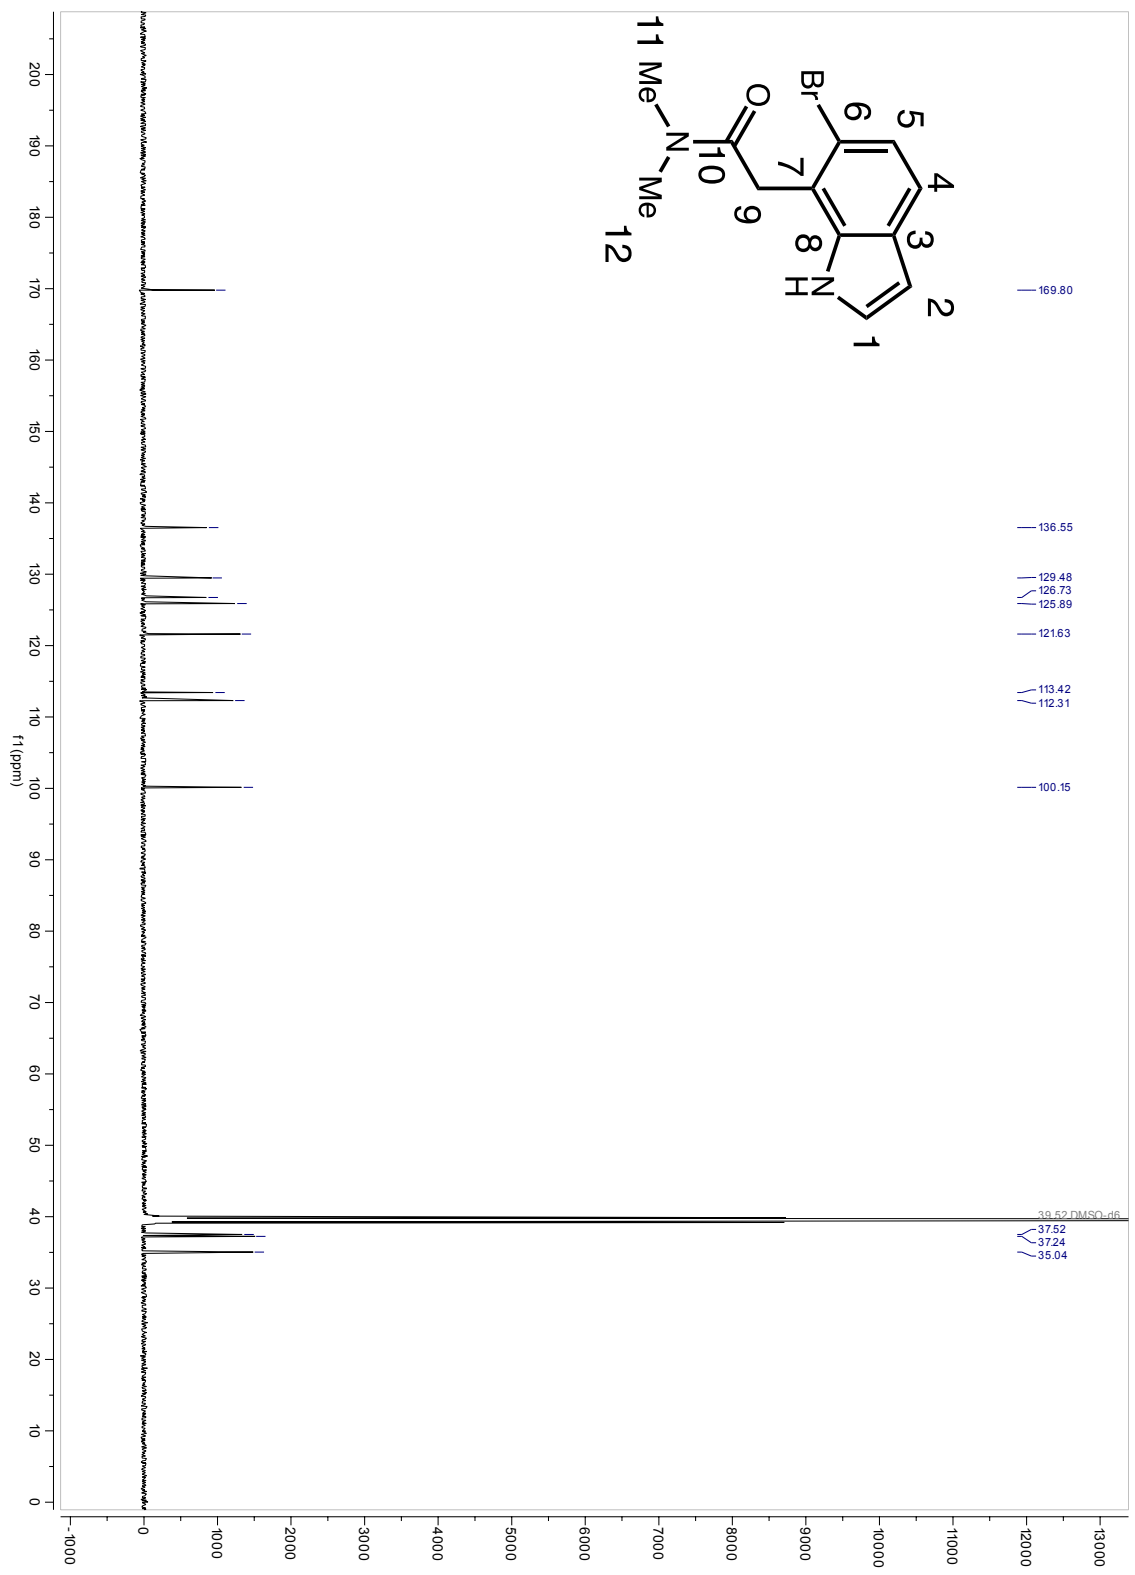

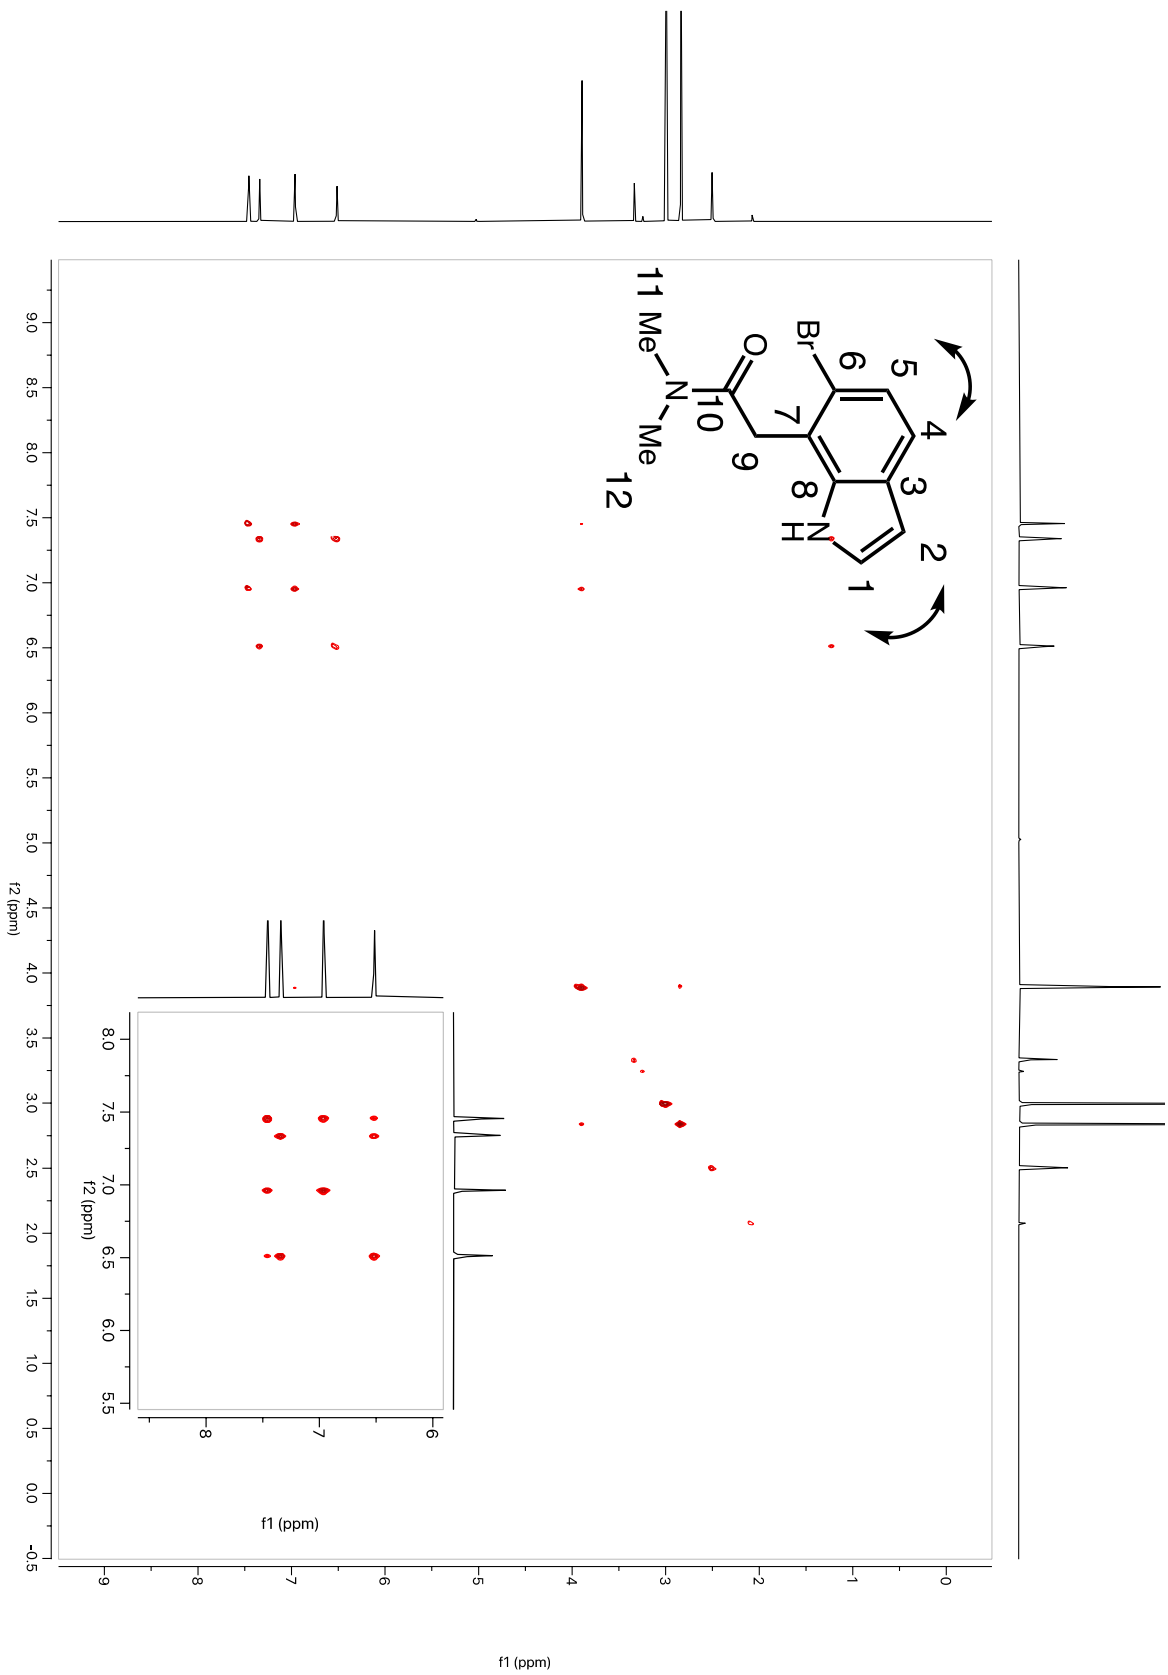



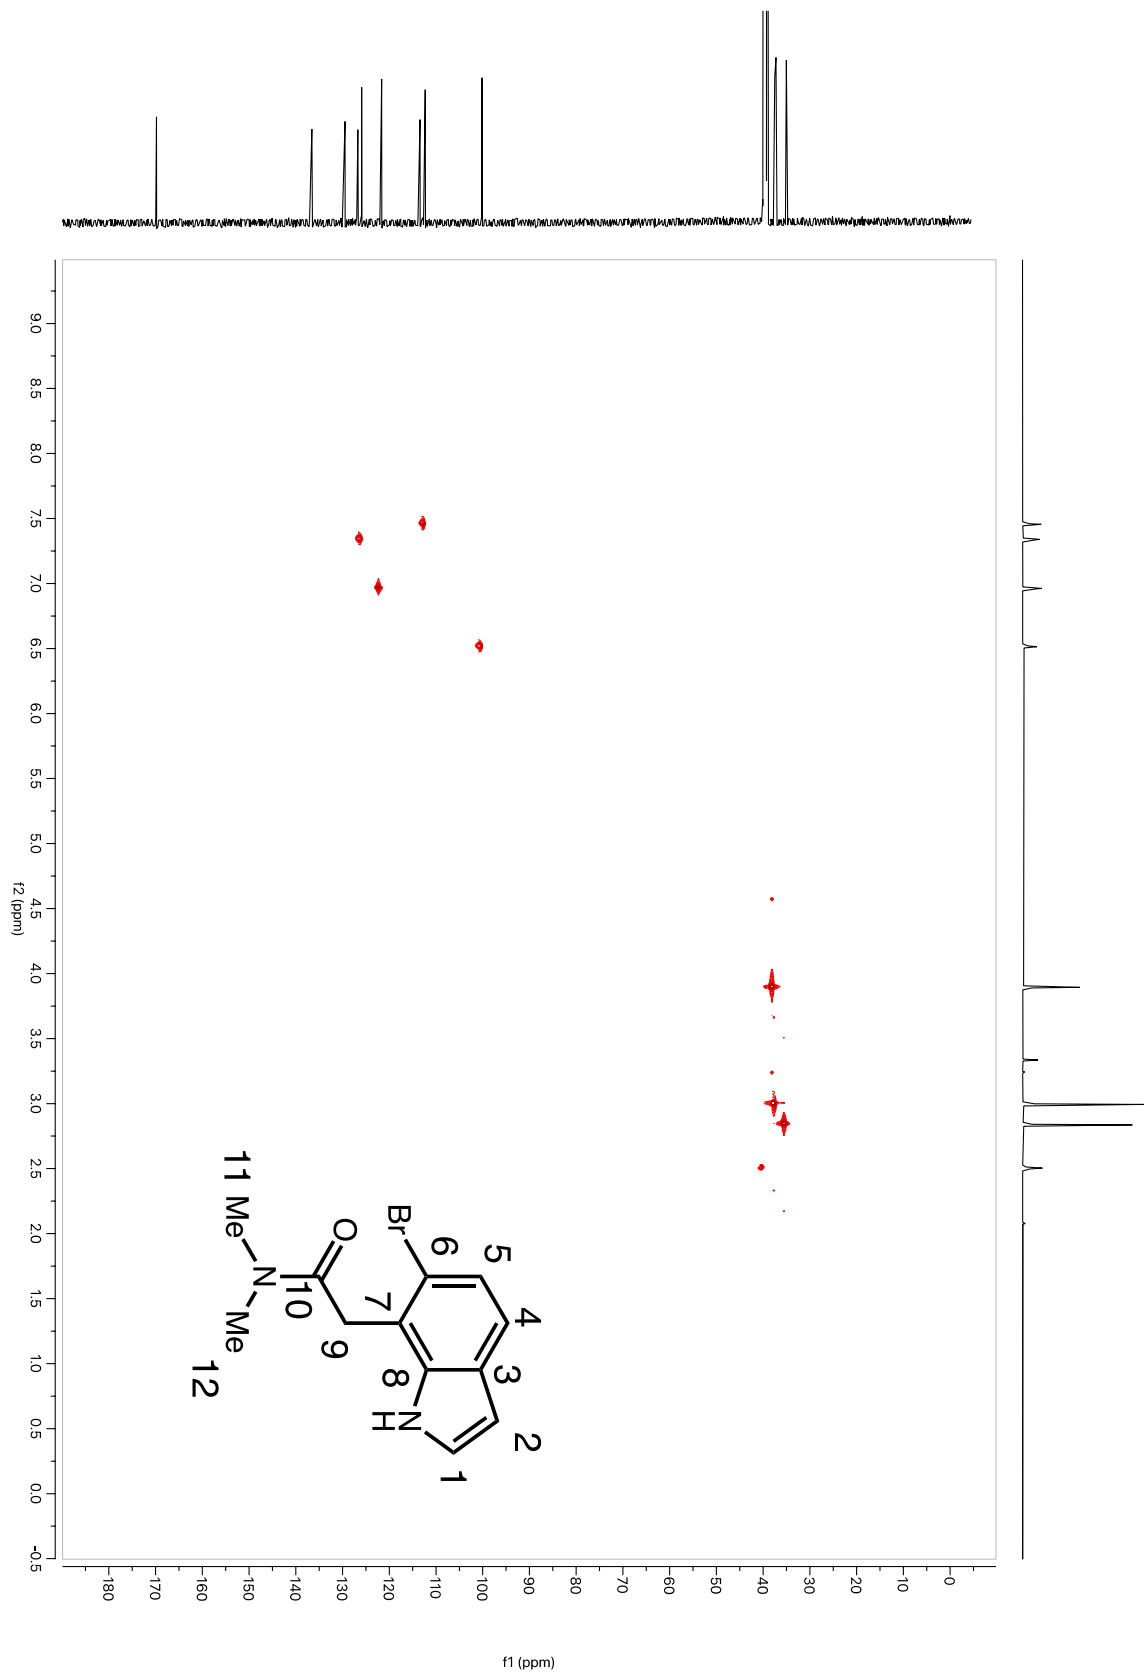

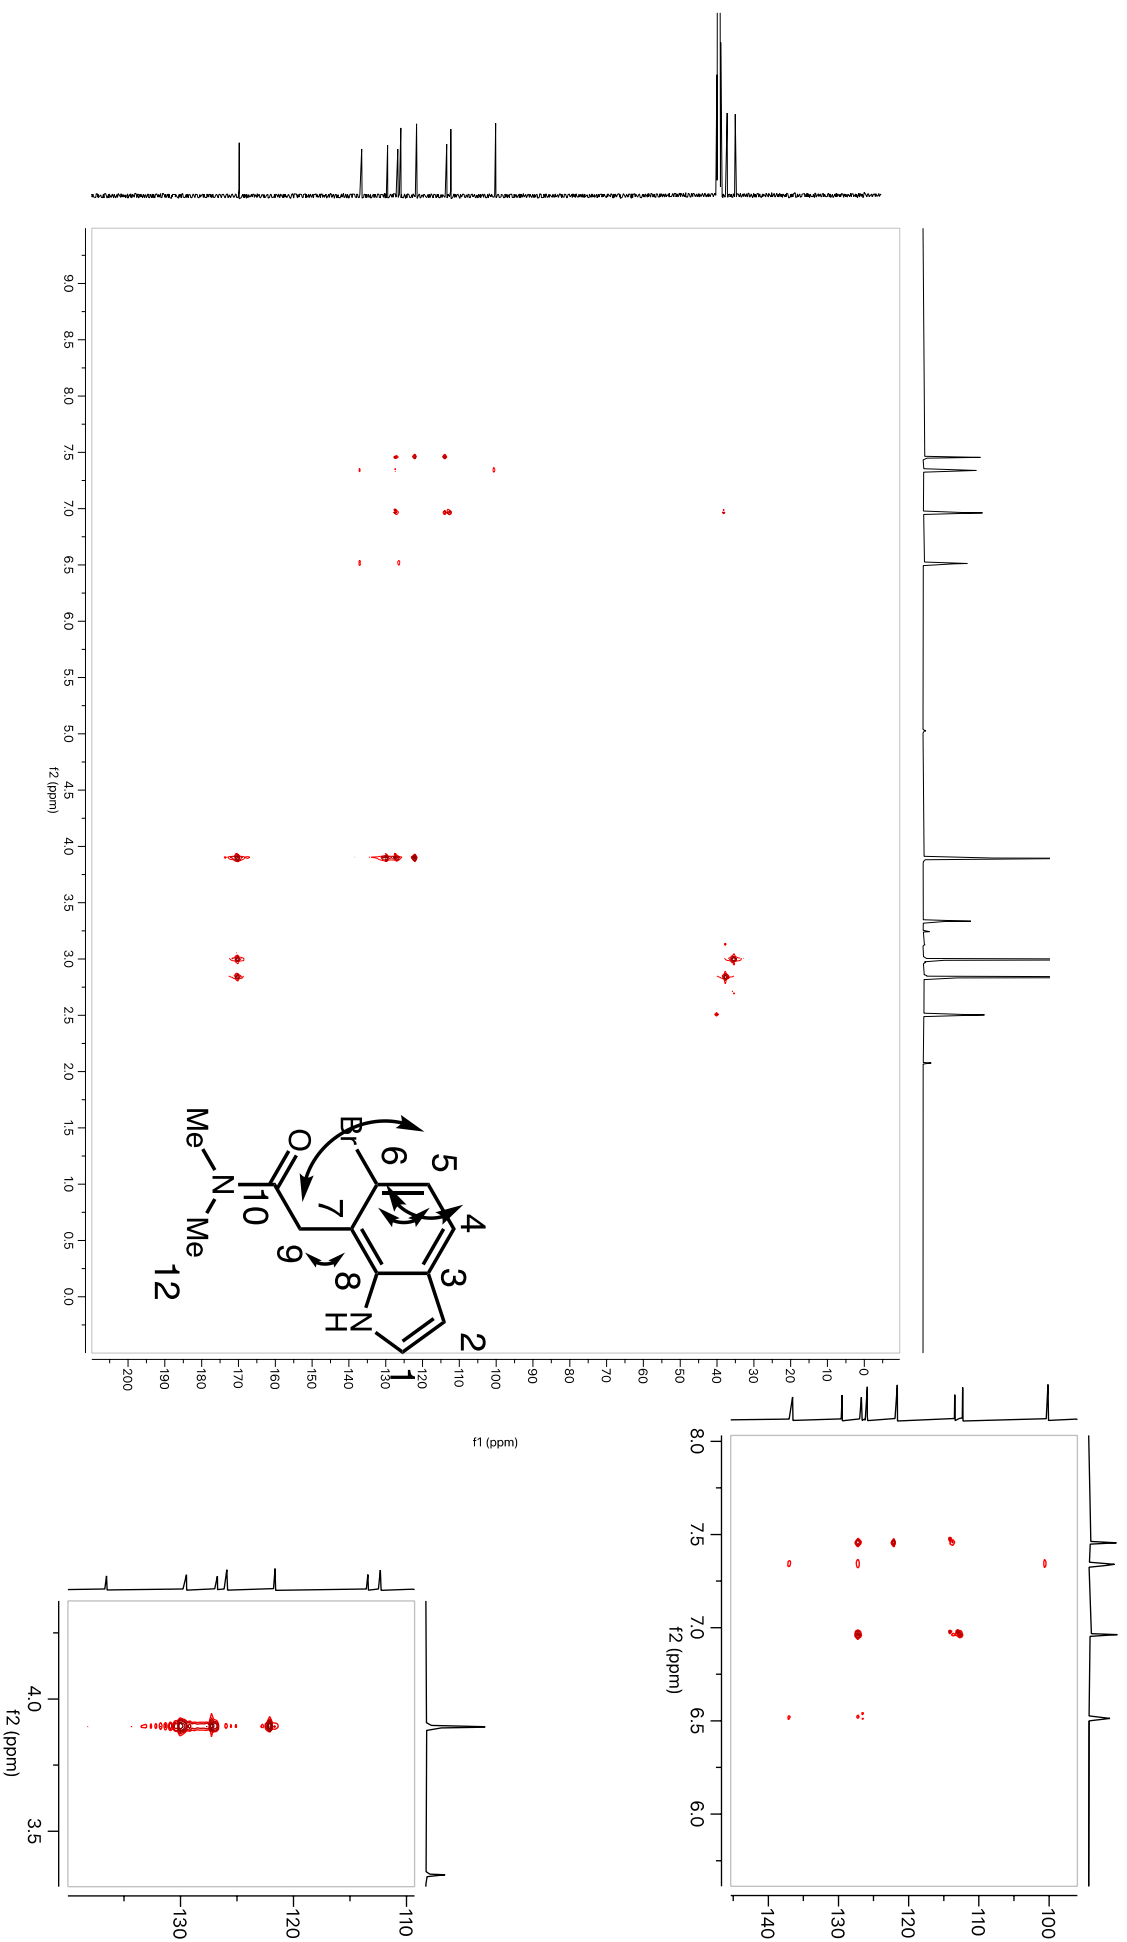

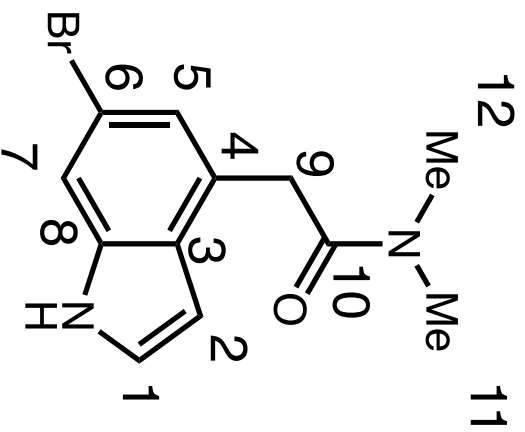

| Position | $\delta_H$ multiplet (J in Hz) | $\delta_C$   |
|----------|--------------------------------|--------------|
| 1        | 7.34, m                        | 126.56       |
| 2        | 6.40, m                        | 100.87       |
| 3        |                                | 127.26       |
| 4        |                                | 125.58       |
| 5        | 7.60                           | 114.50       |
| 6        |                                | 116.97       |
| 7        | 7.42                           | 122.40       |
| 8        |                                | 135.63       |
| 9        | 3.89, s                        | 39.81        |
| 10       |                                | 169.93       |
| 11, 12   | 2.99, 2.84                     | 36.97, 35.09 |

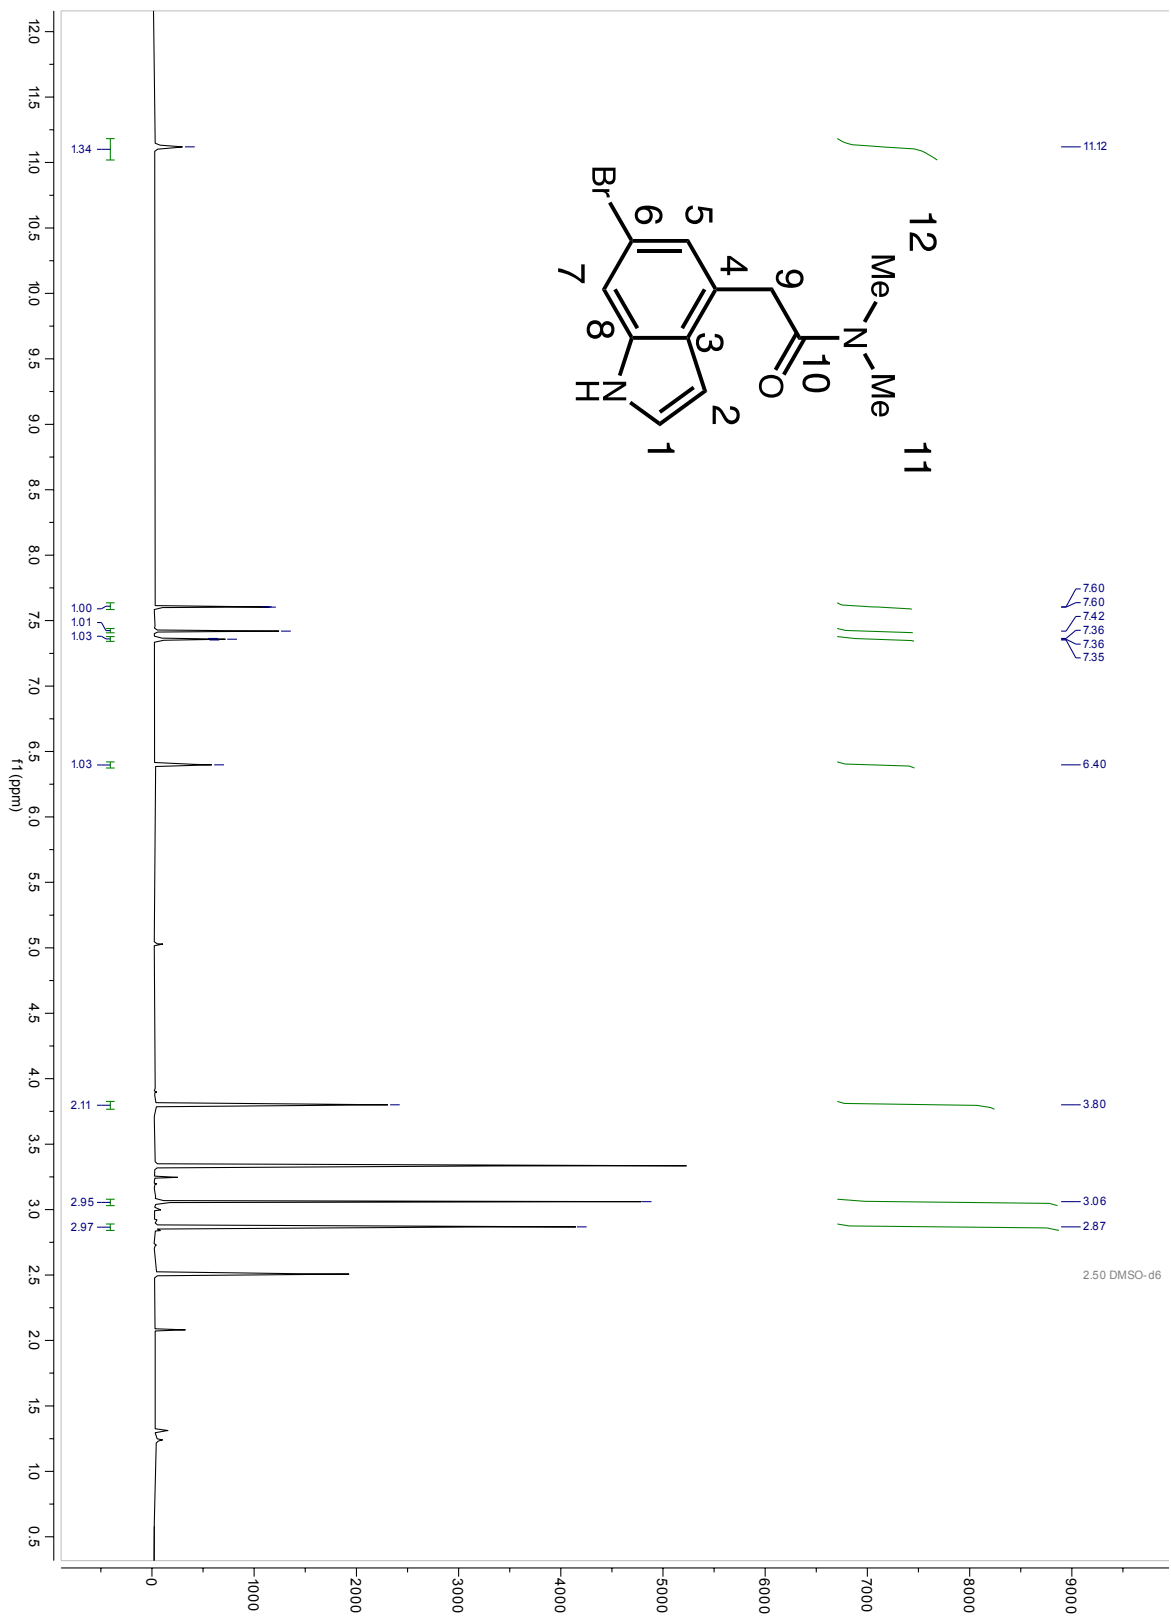

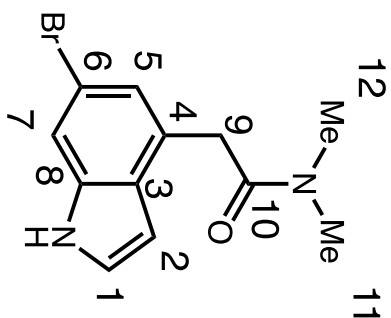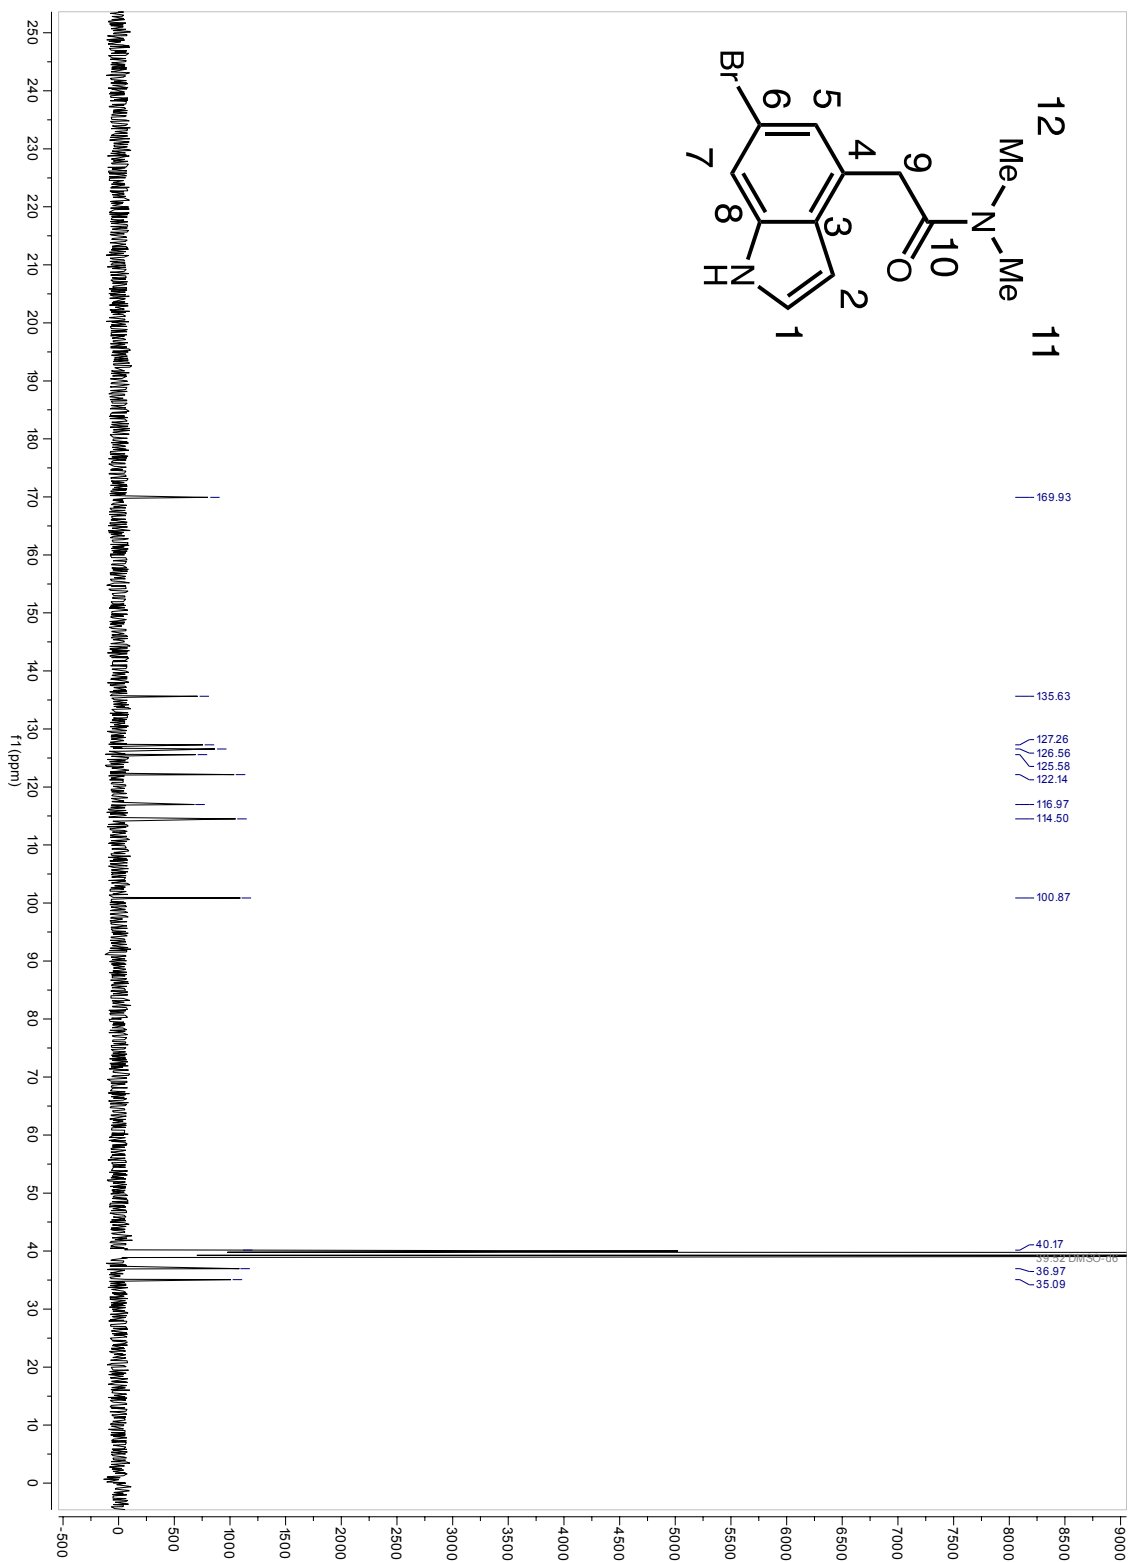

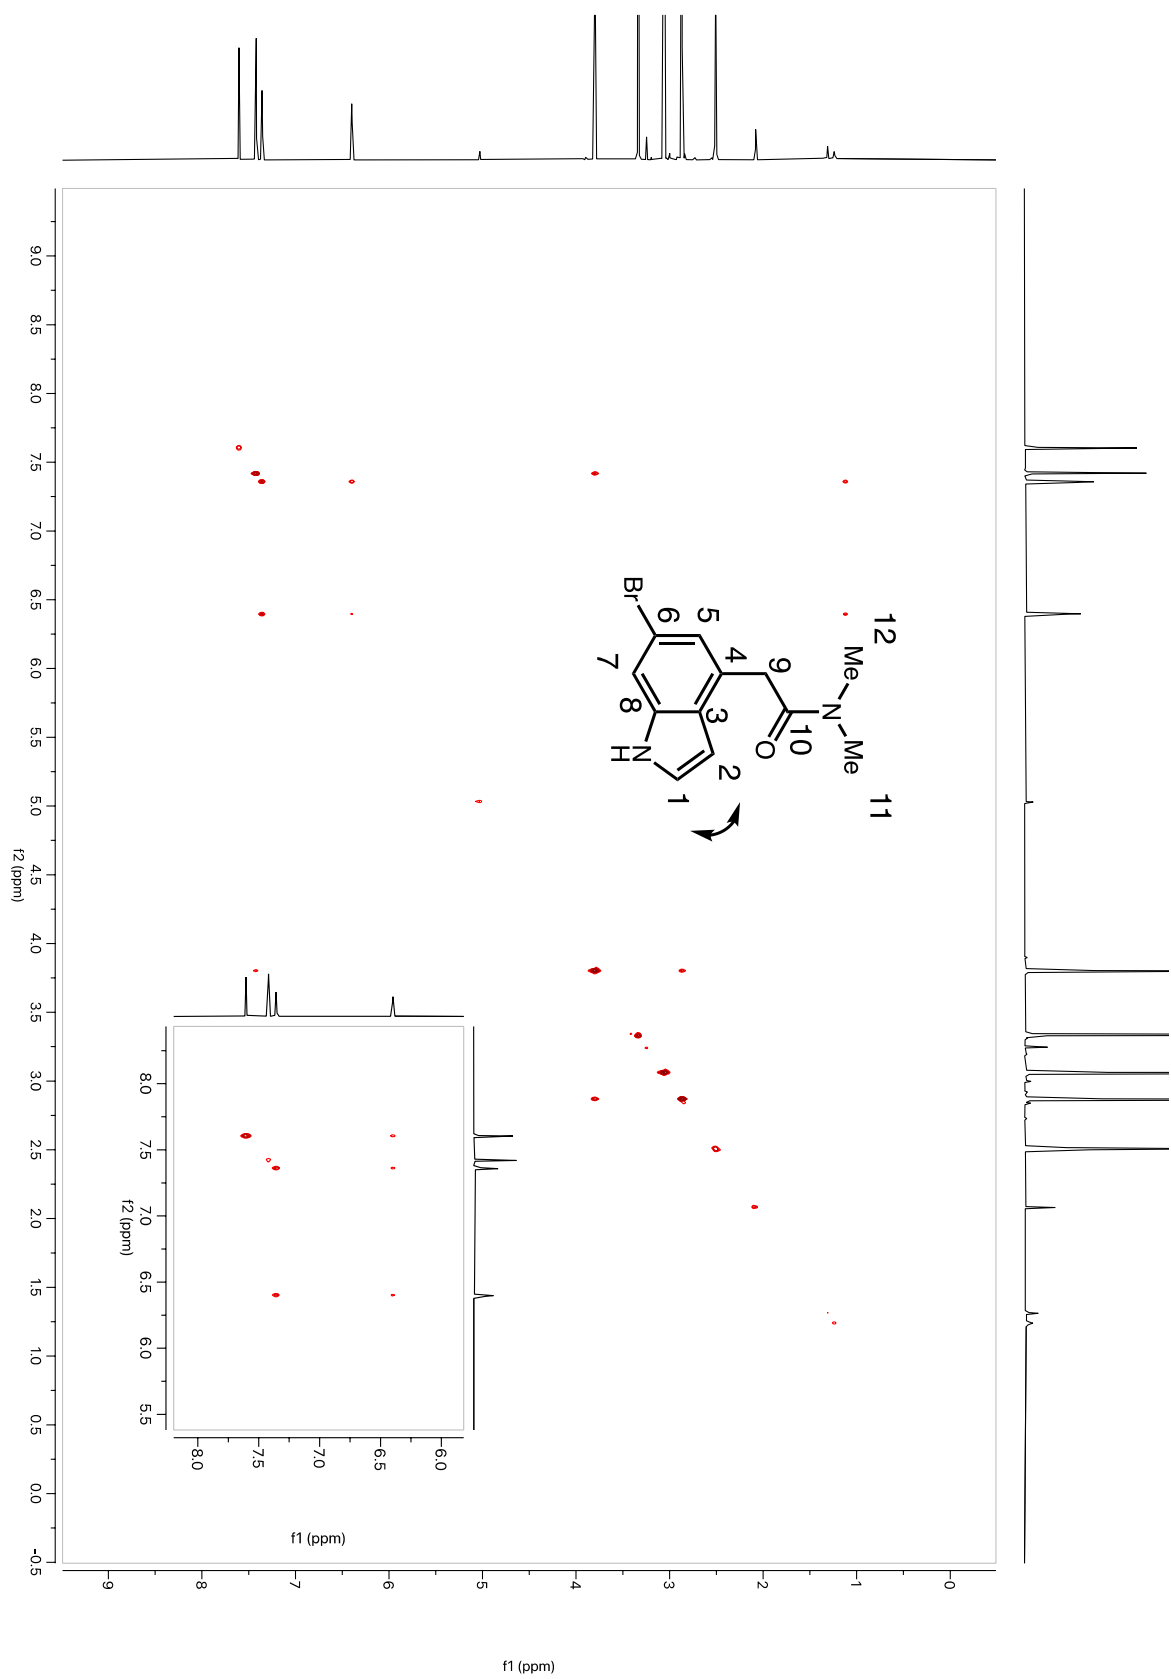

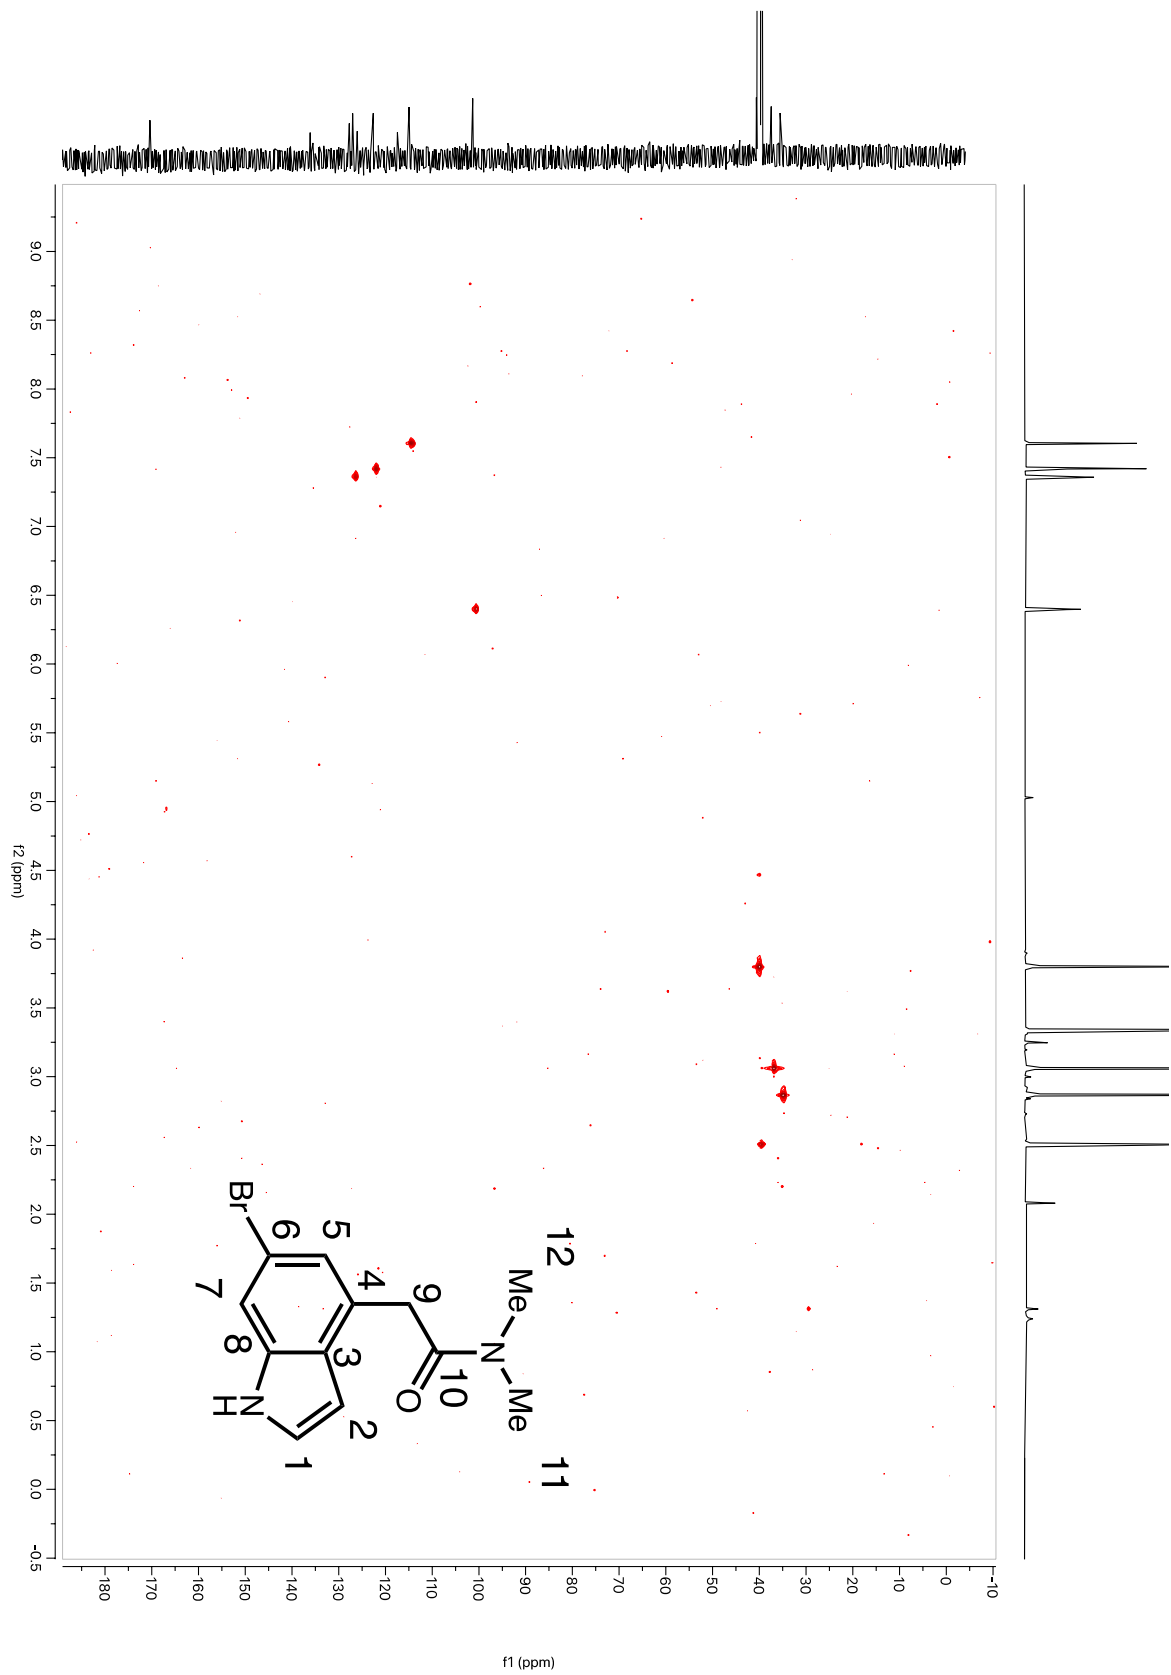

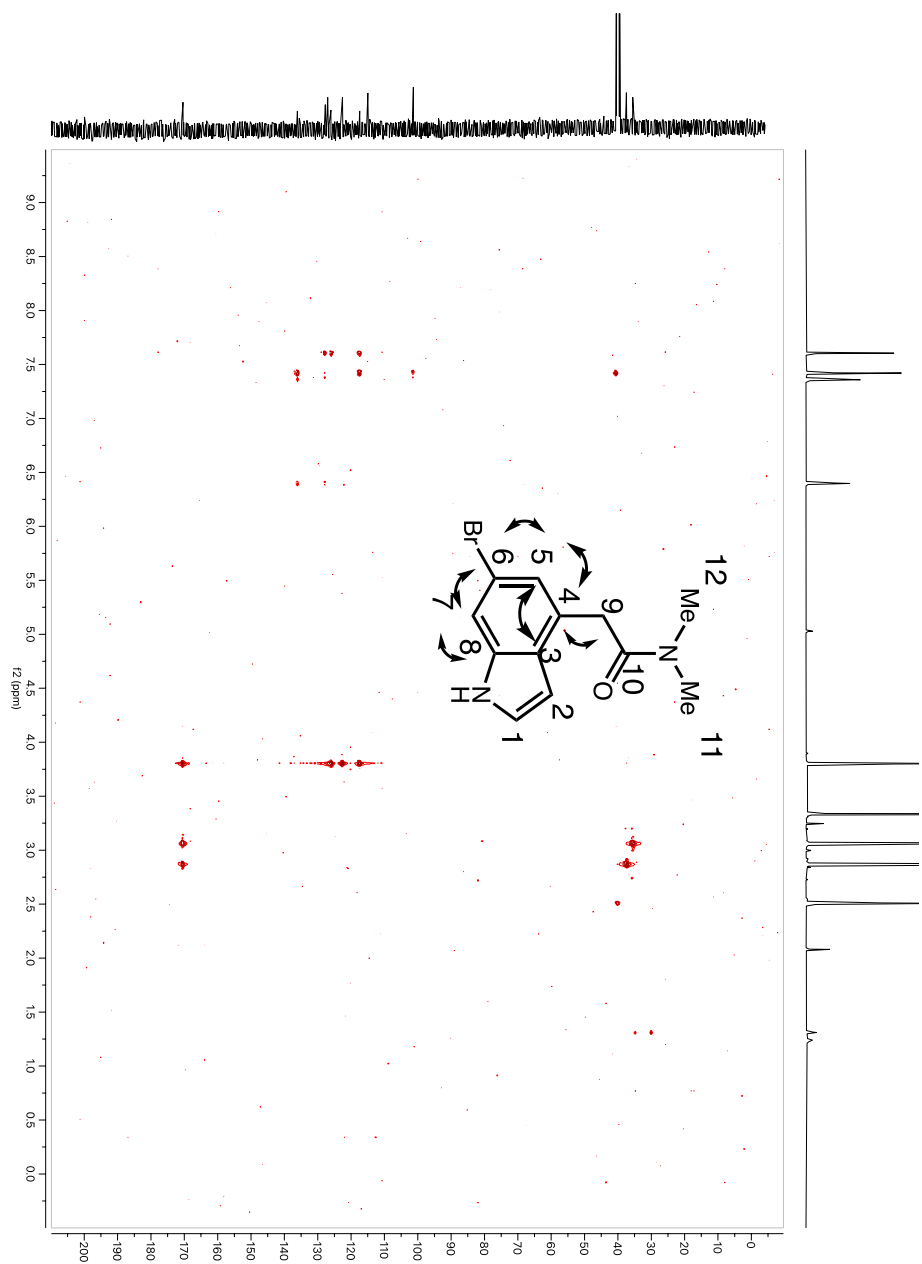

f1 (ppm)

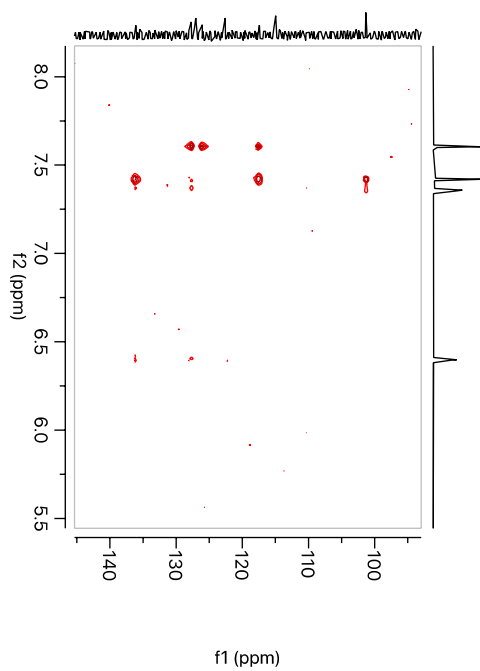

f1 (ppm)

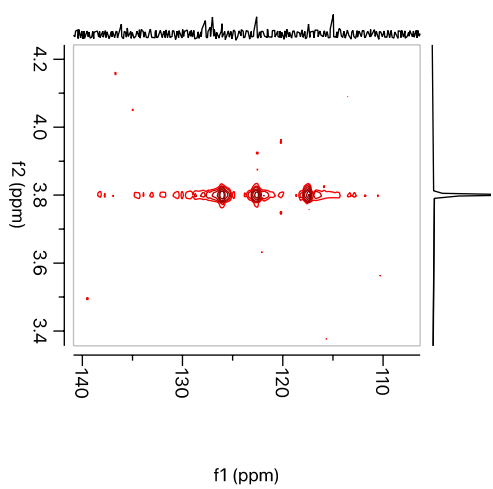

f1 (ppm)



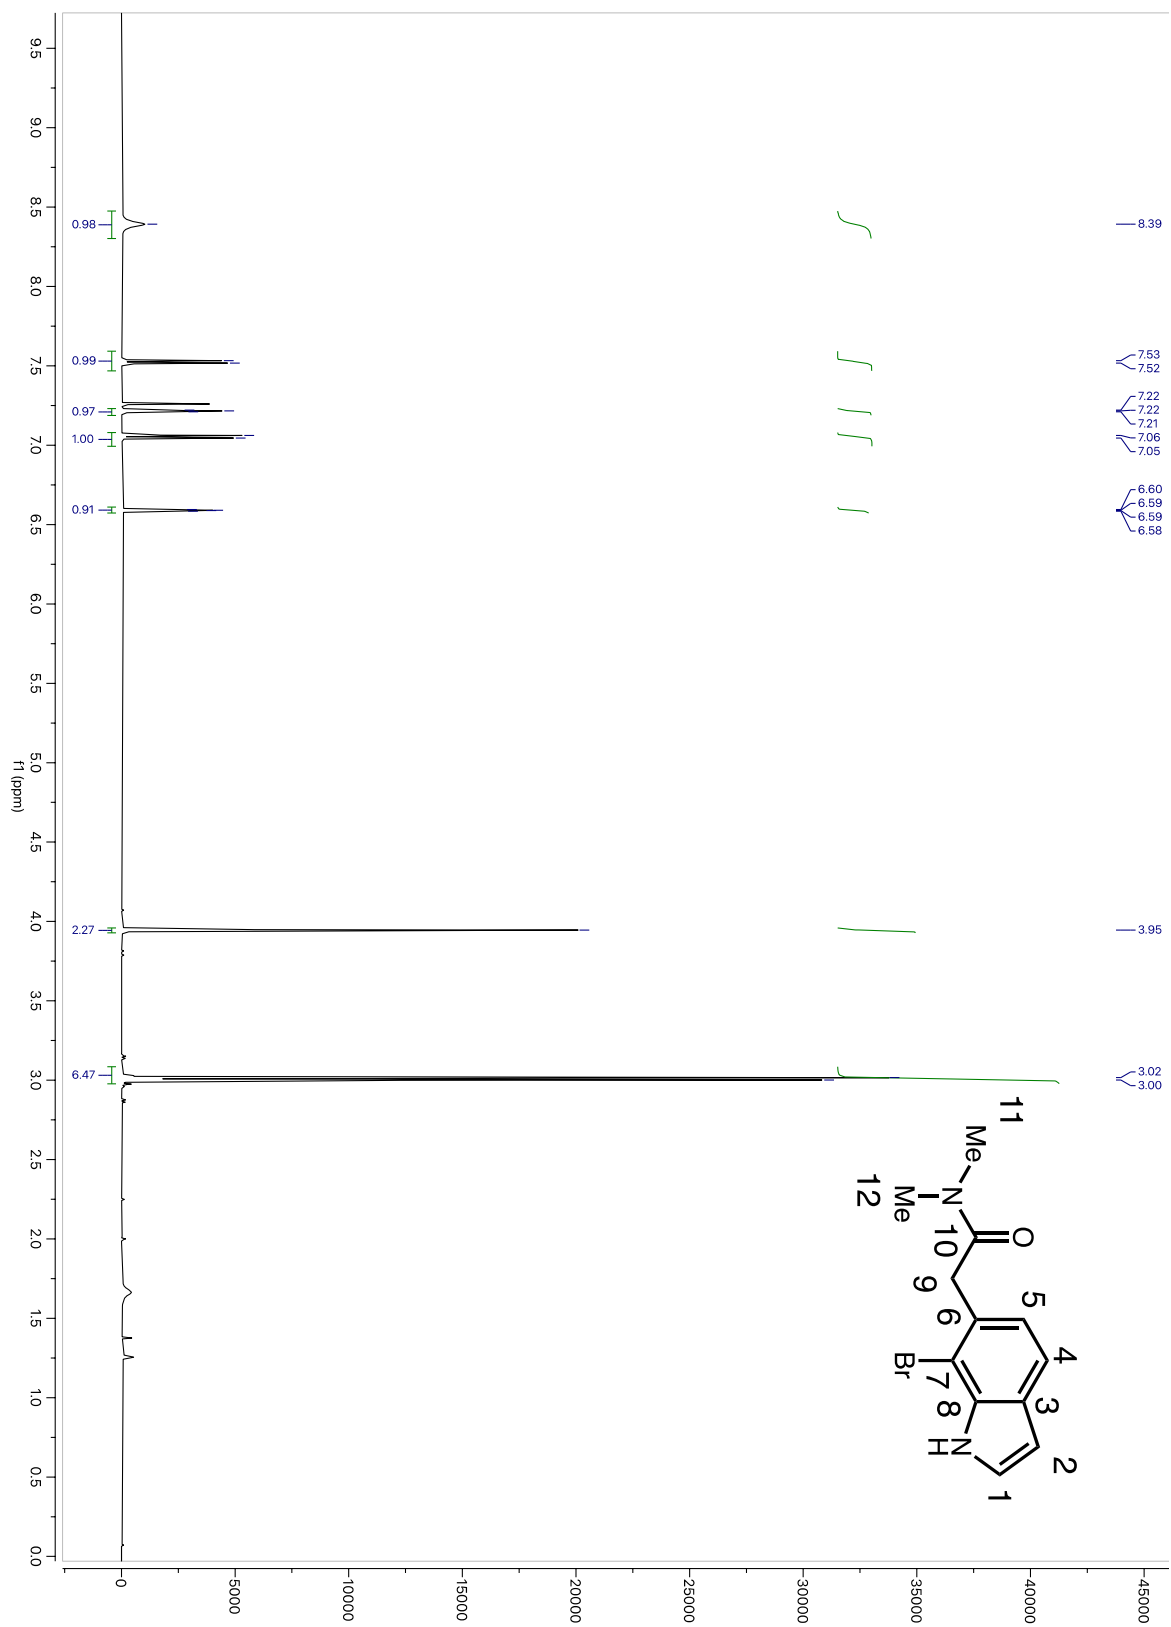

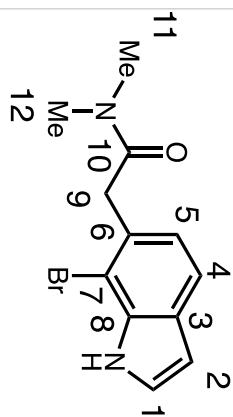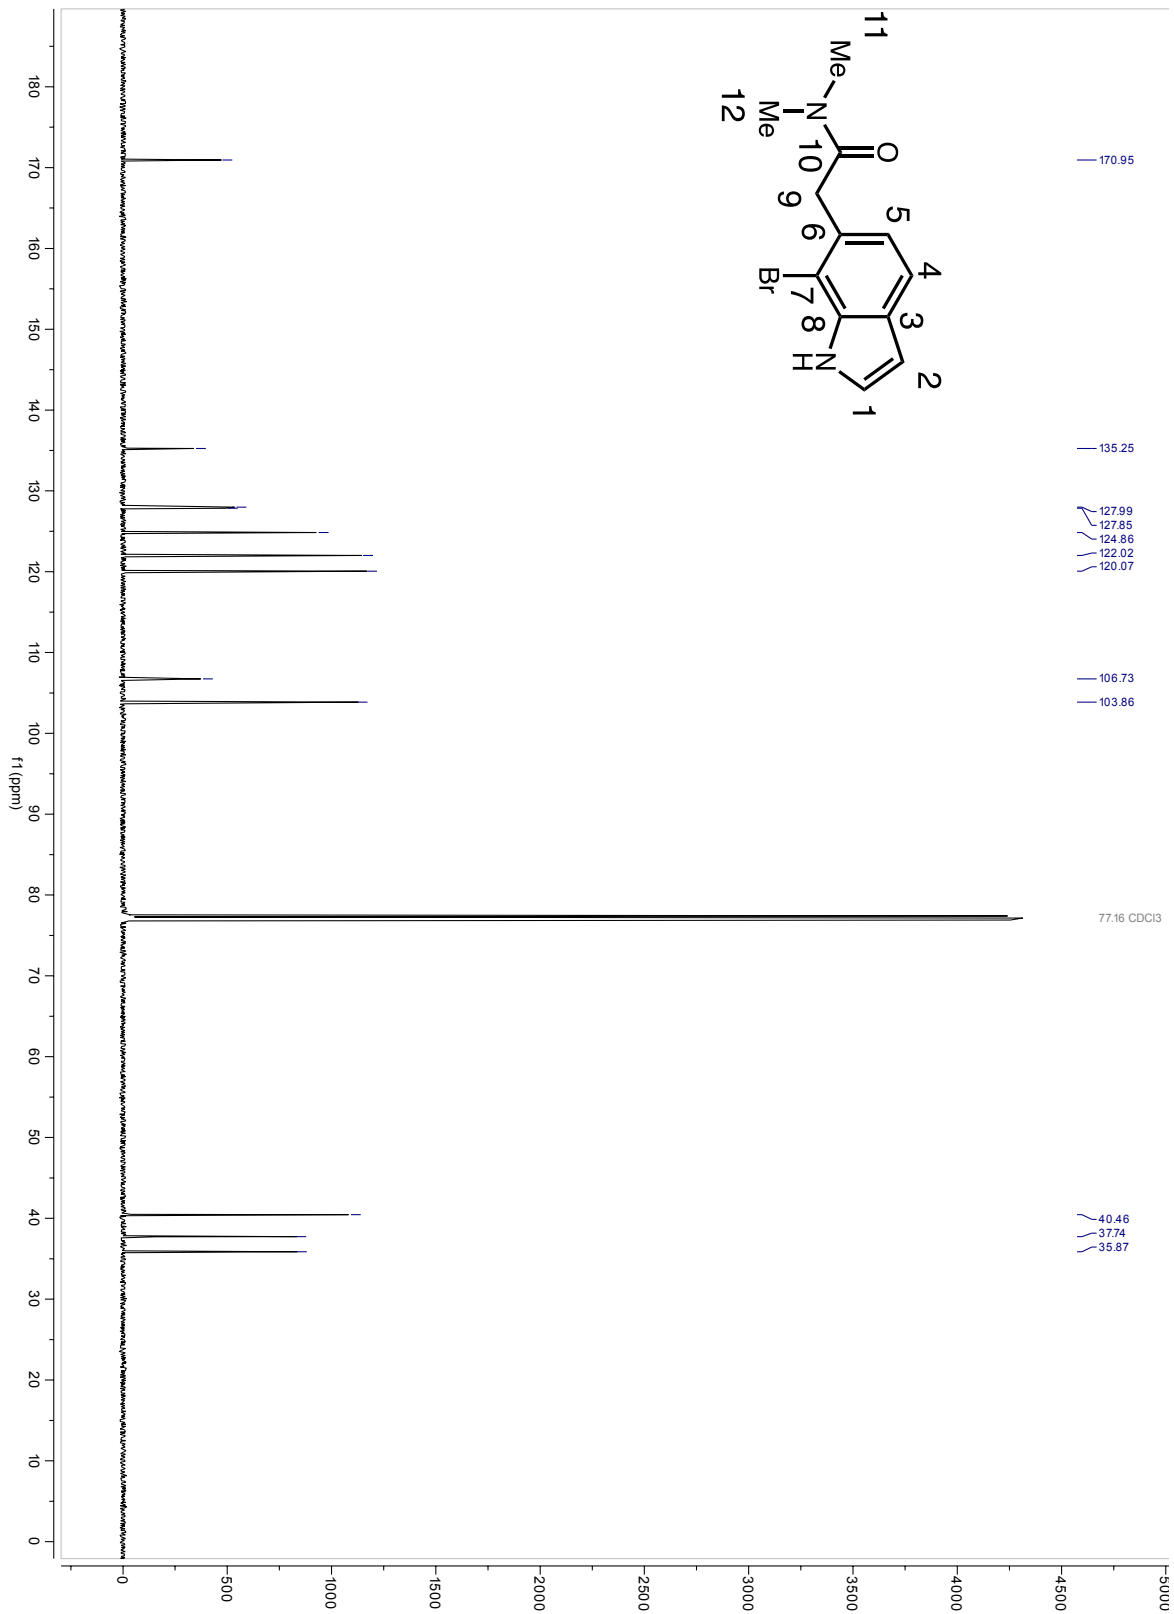

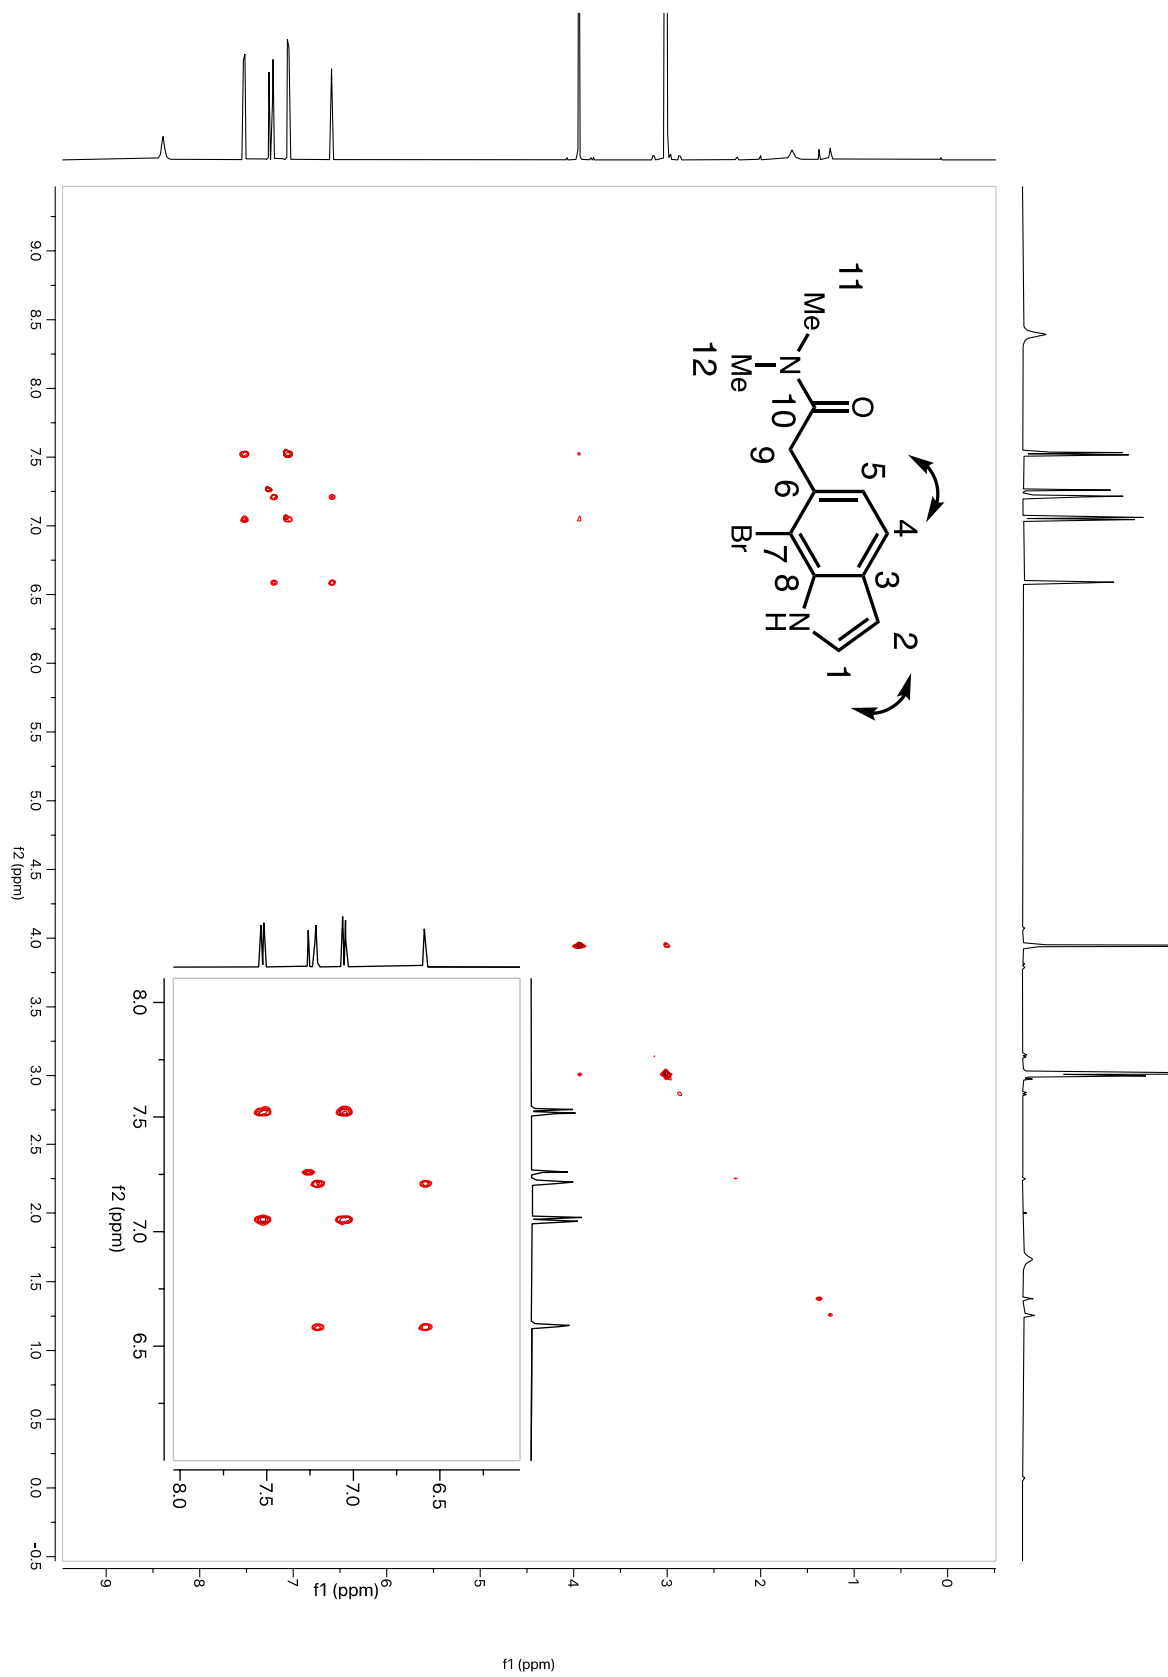

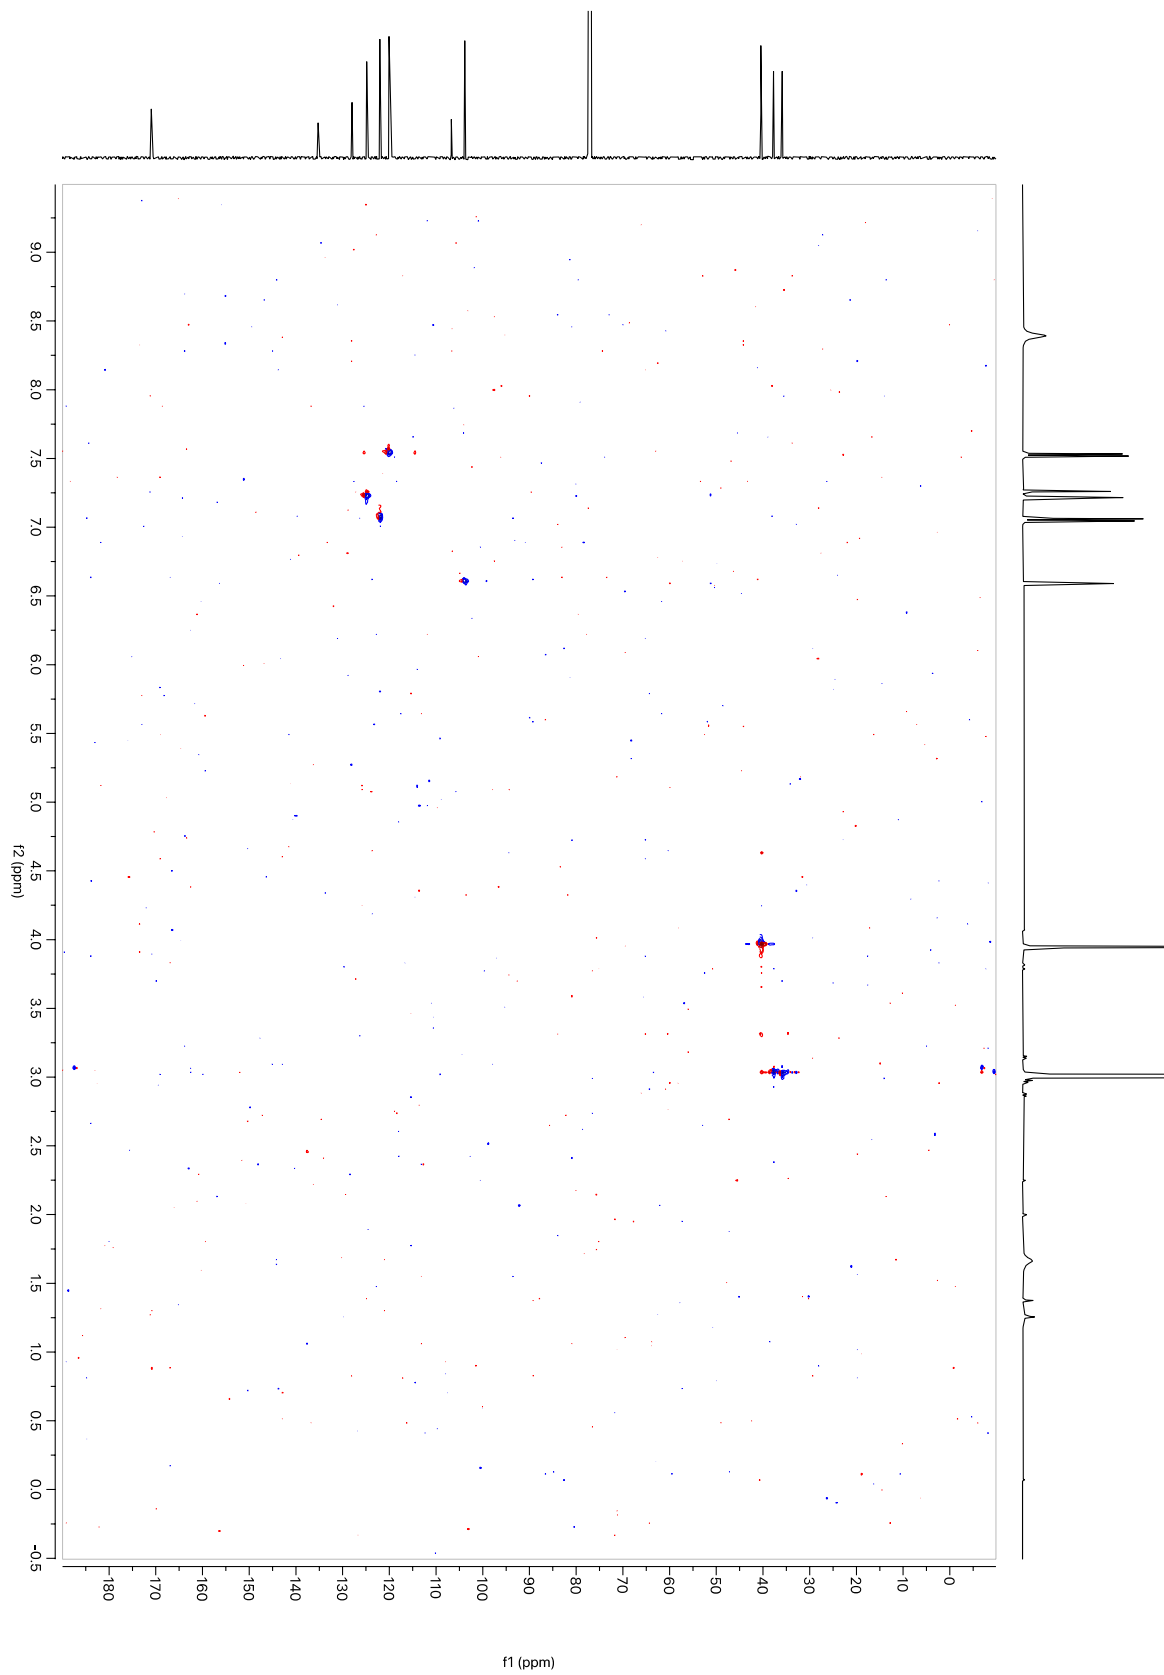

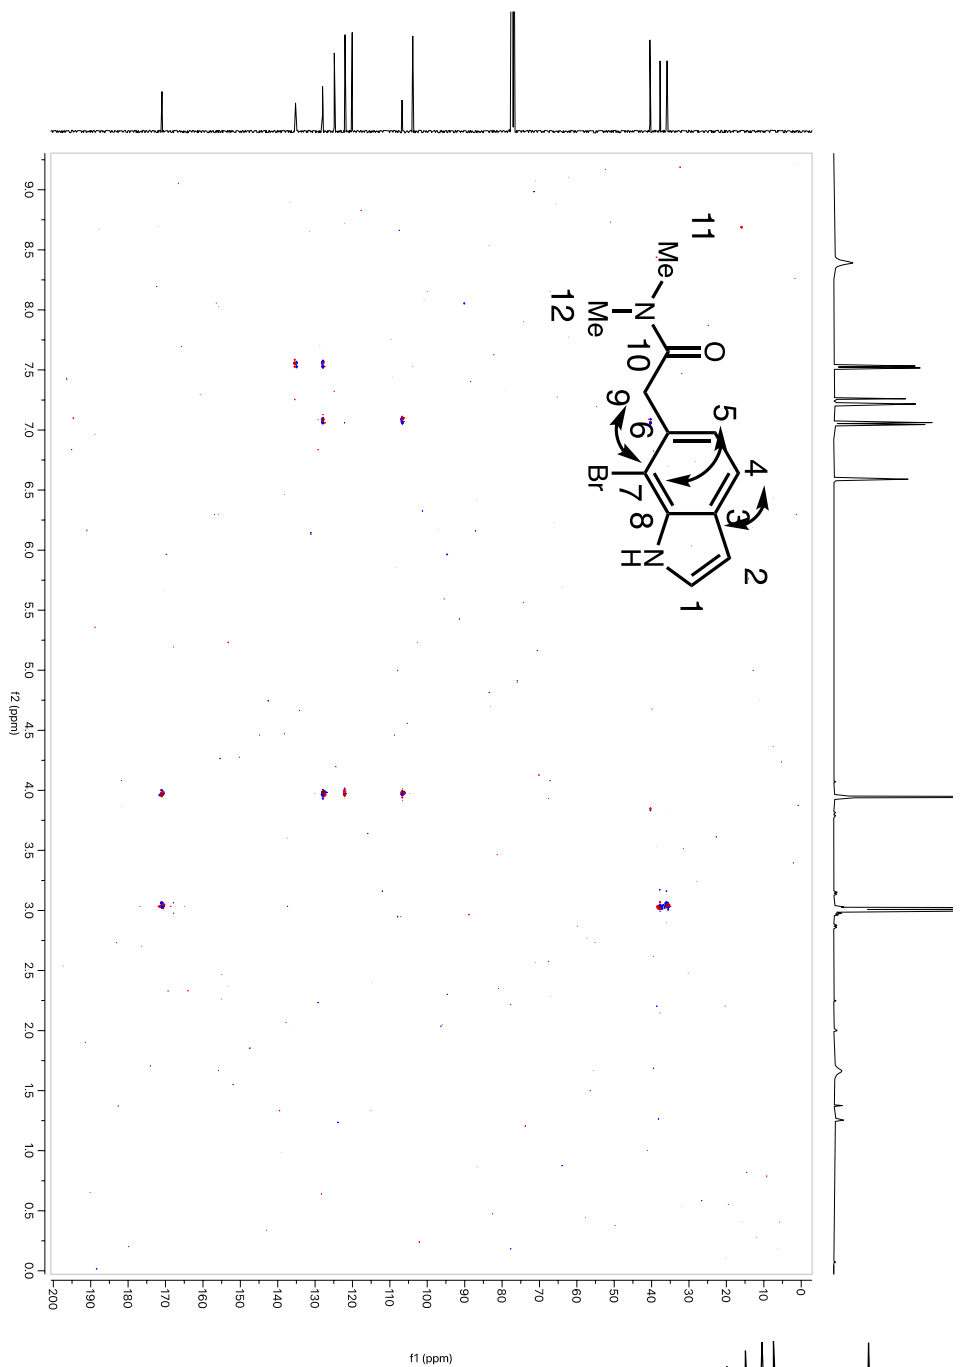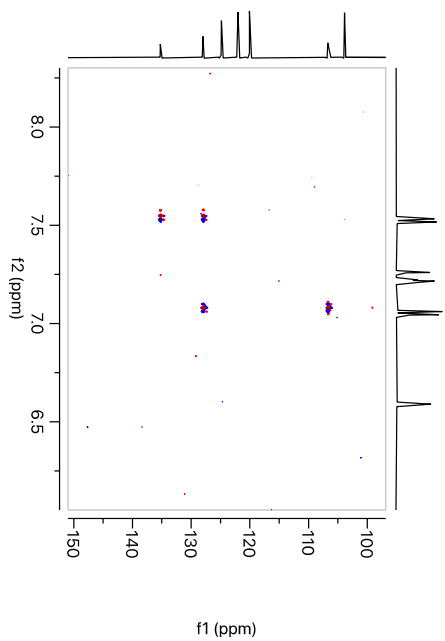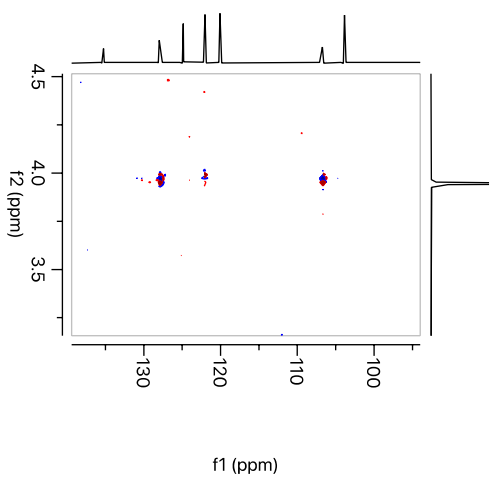

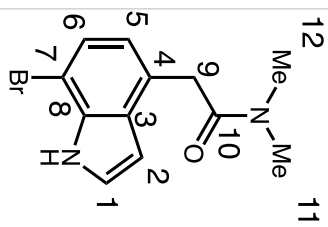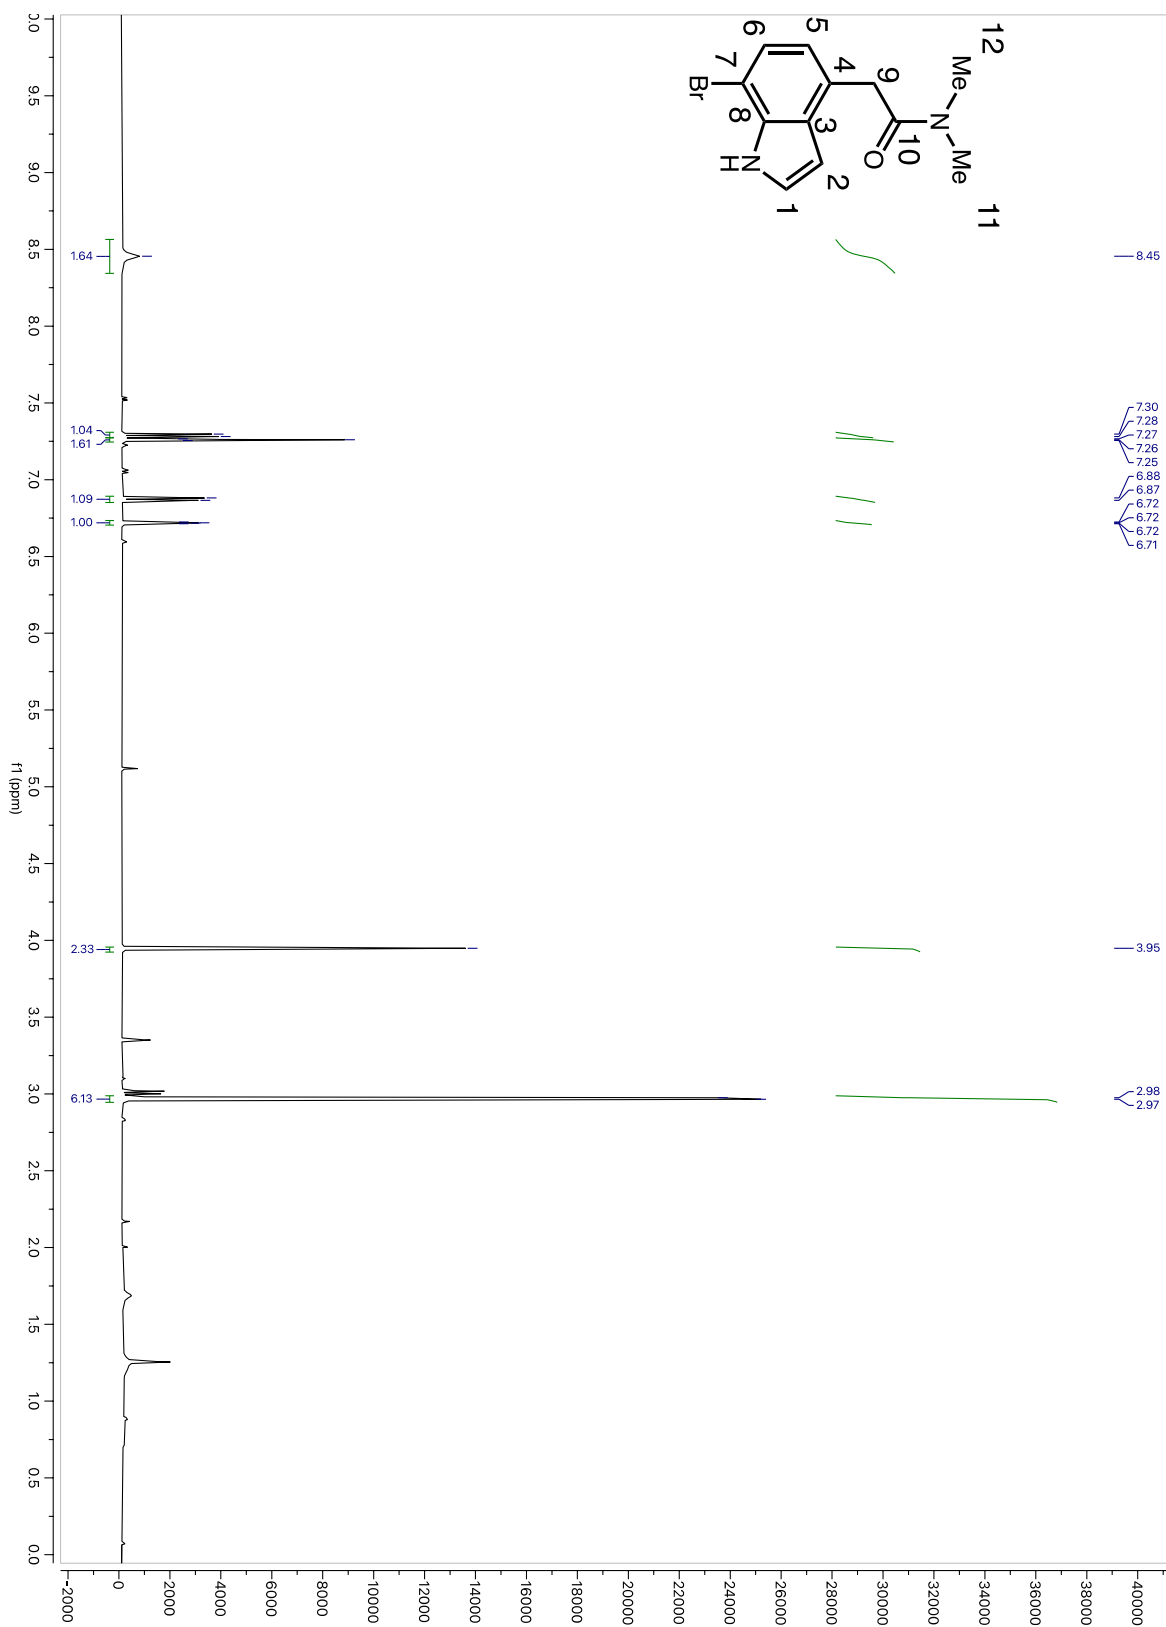

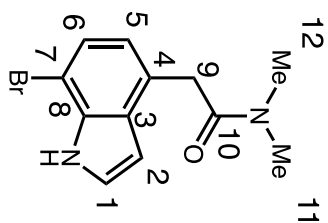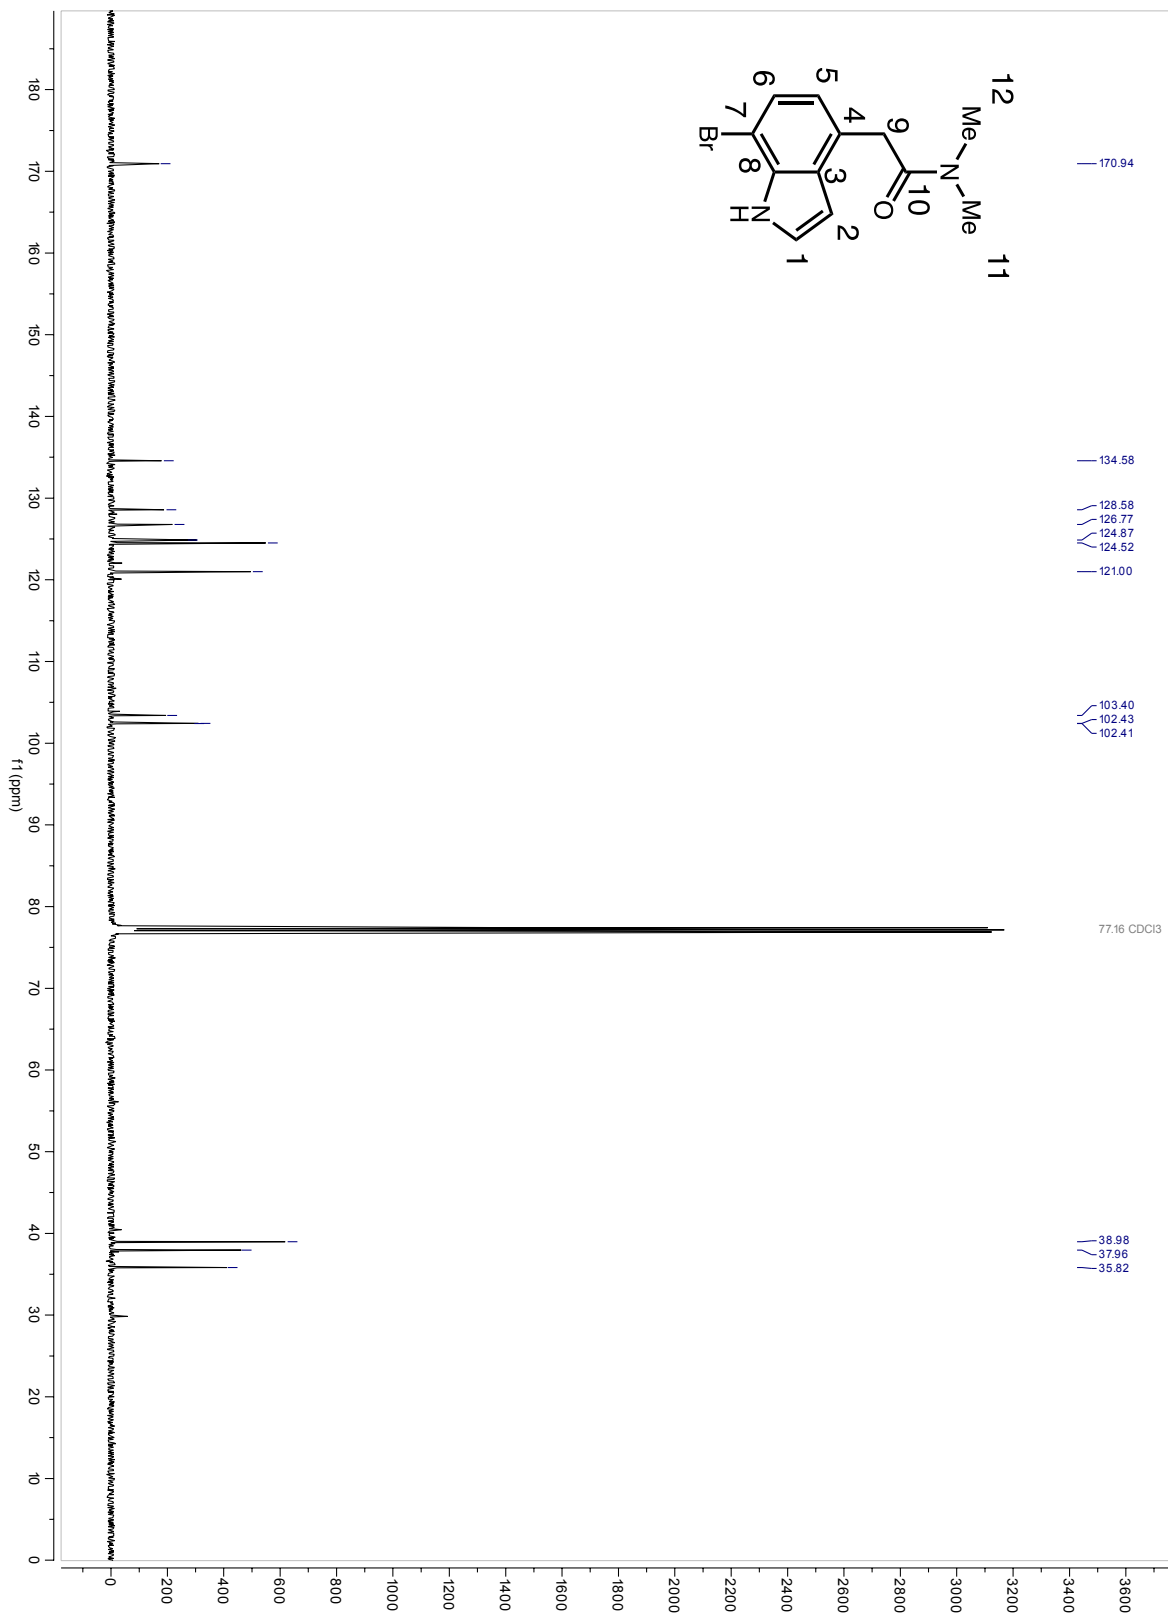

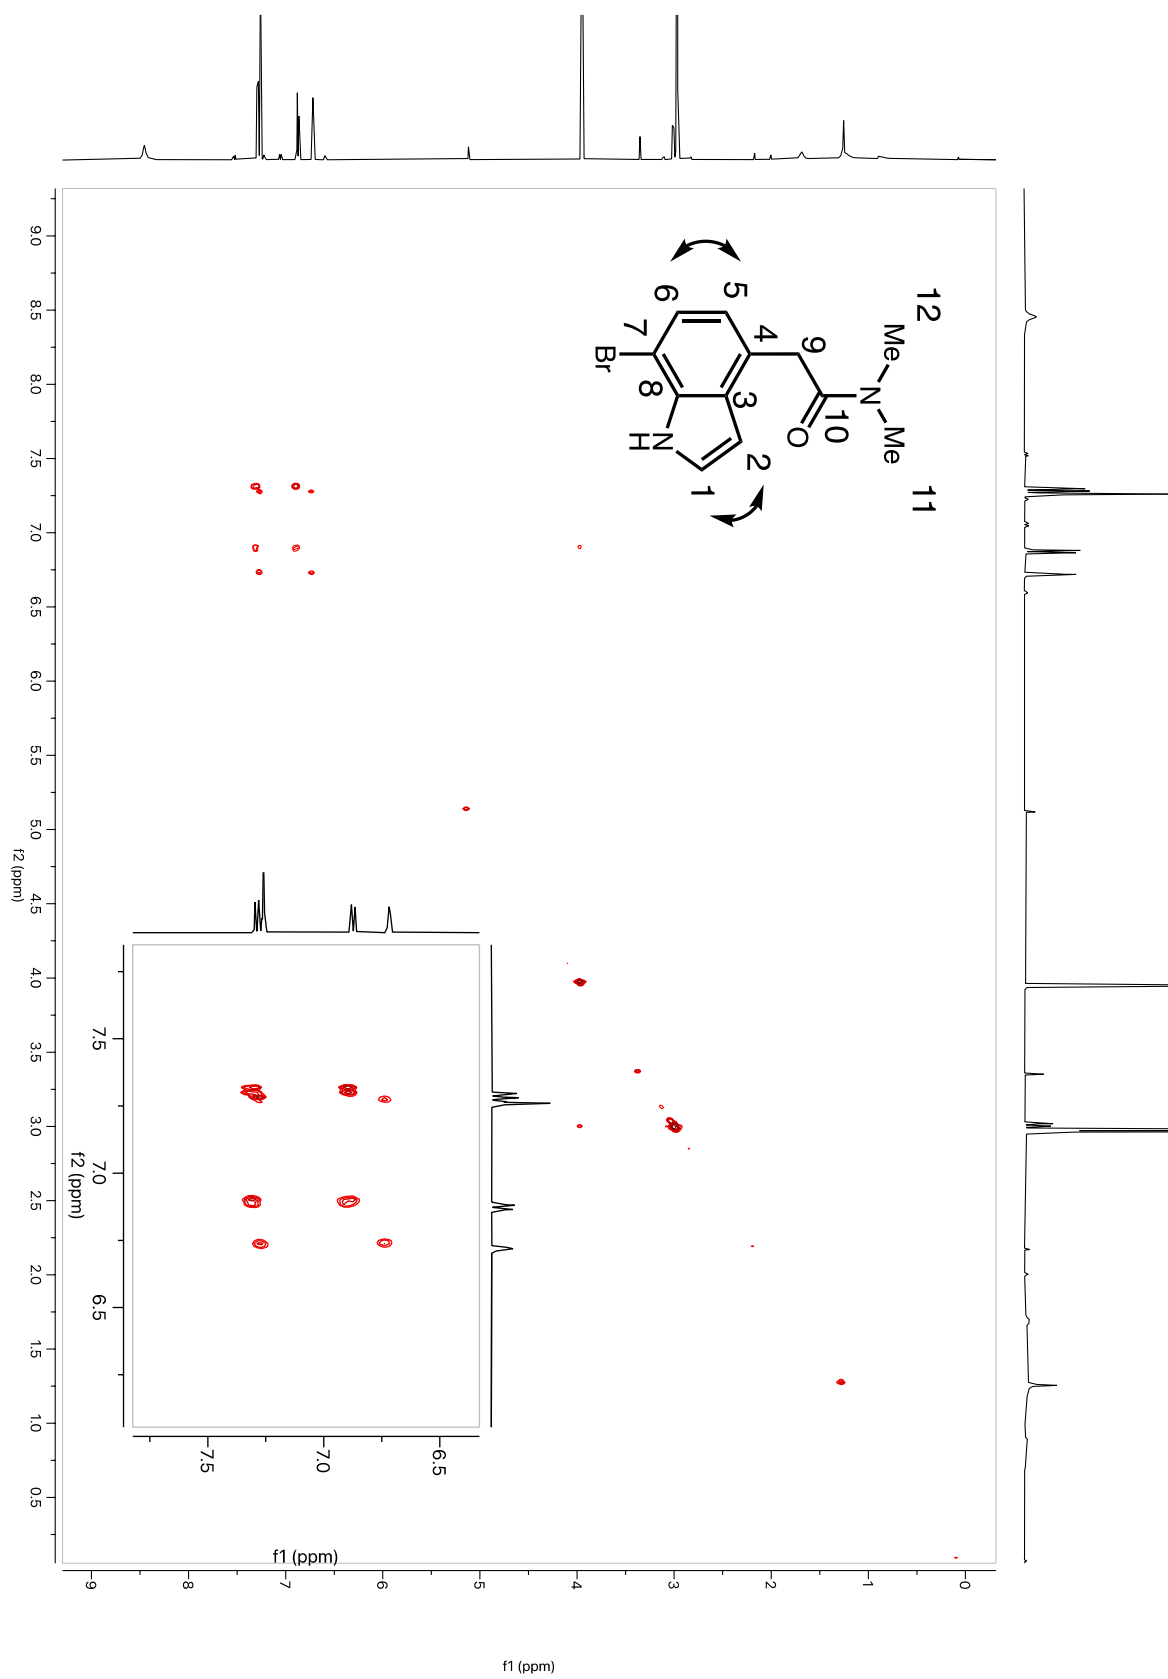



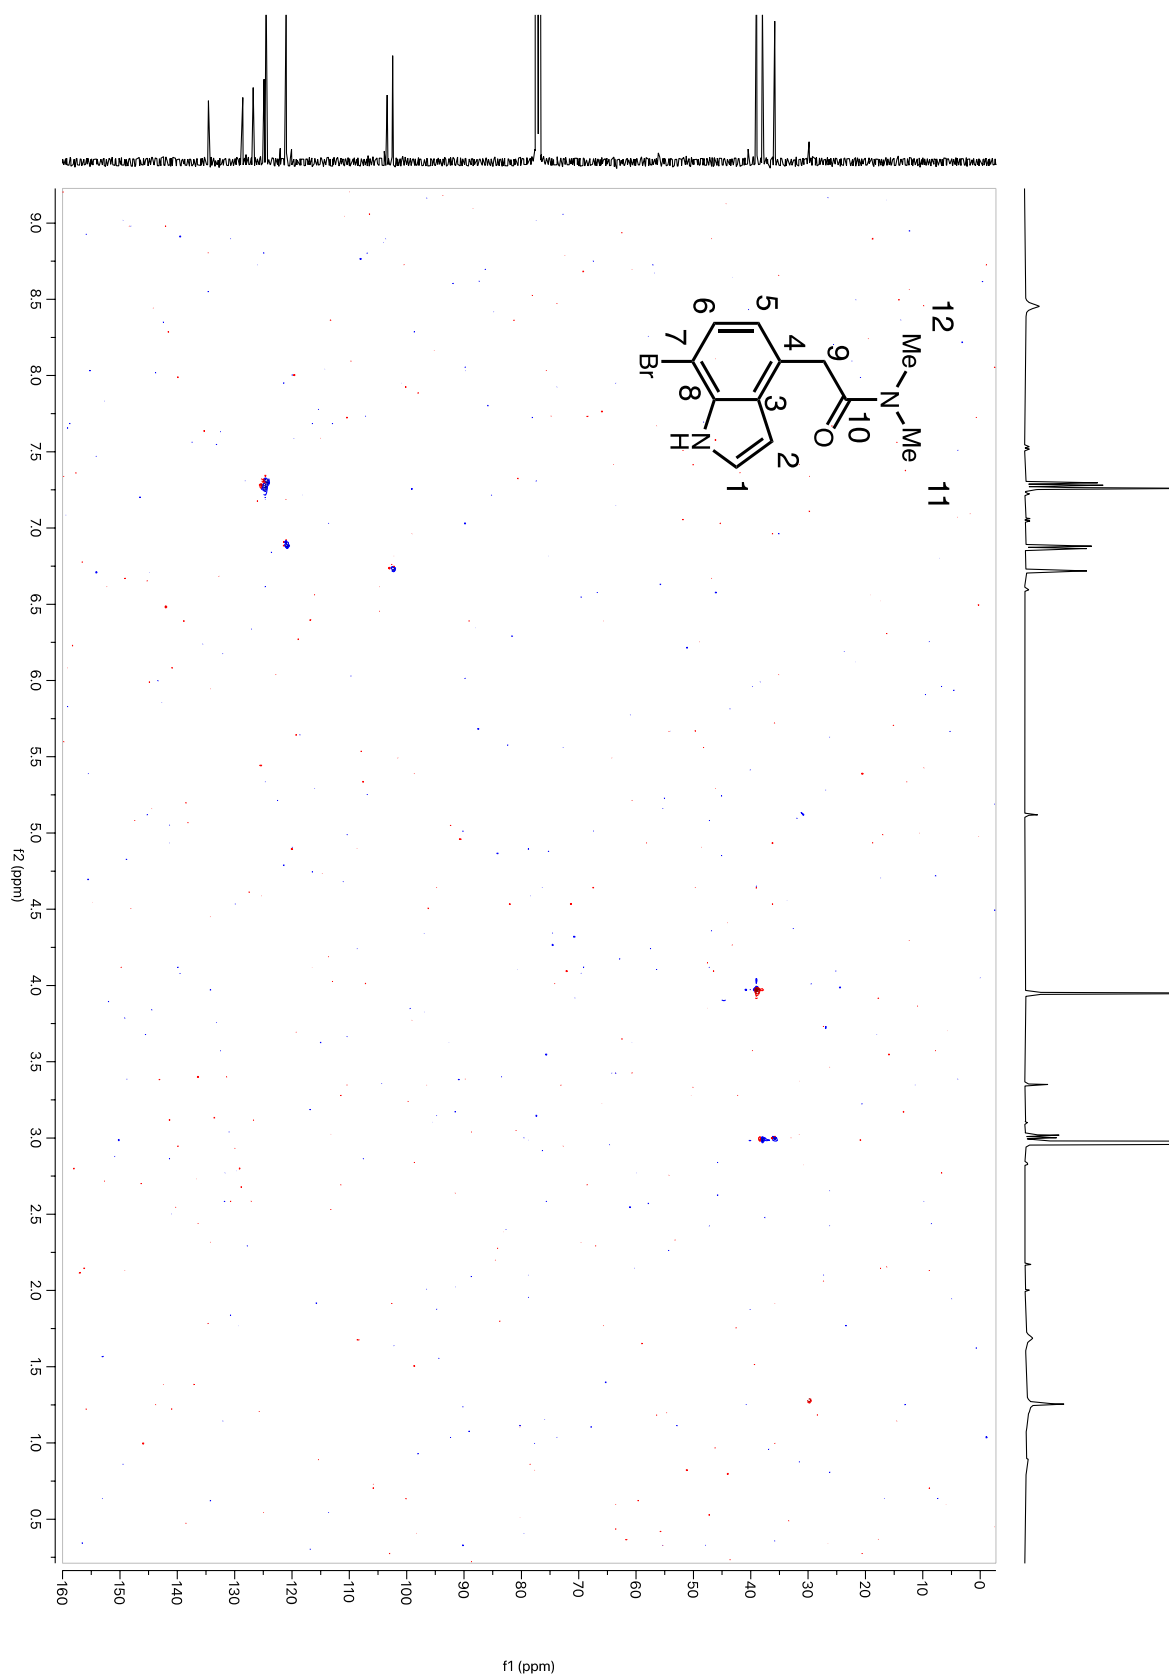

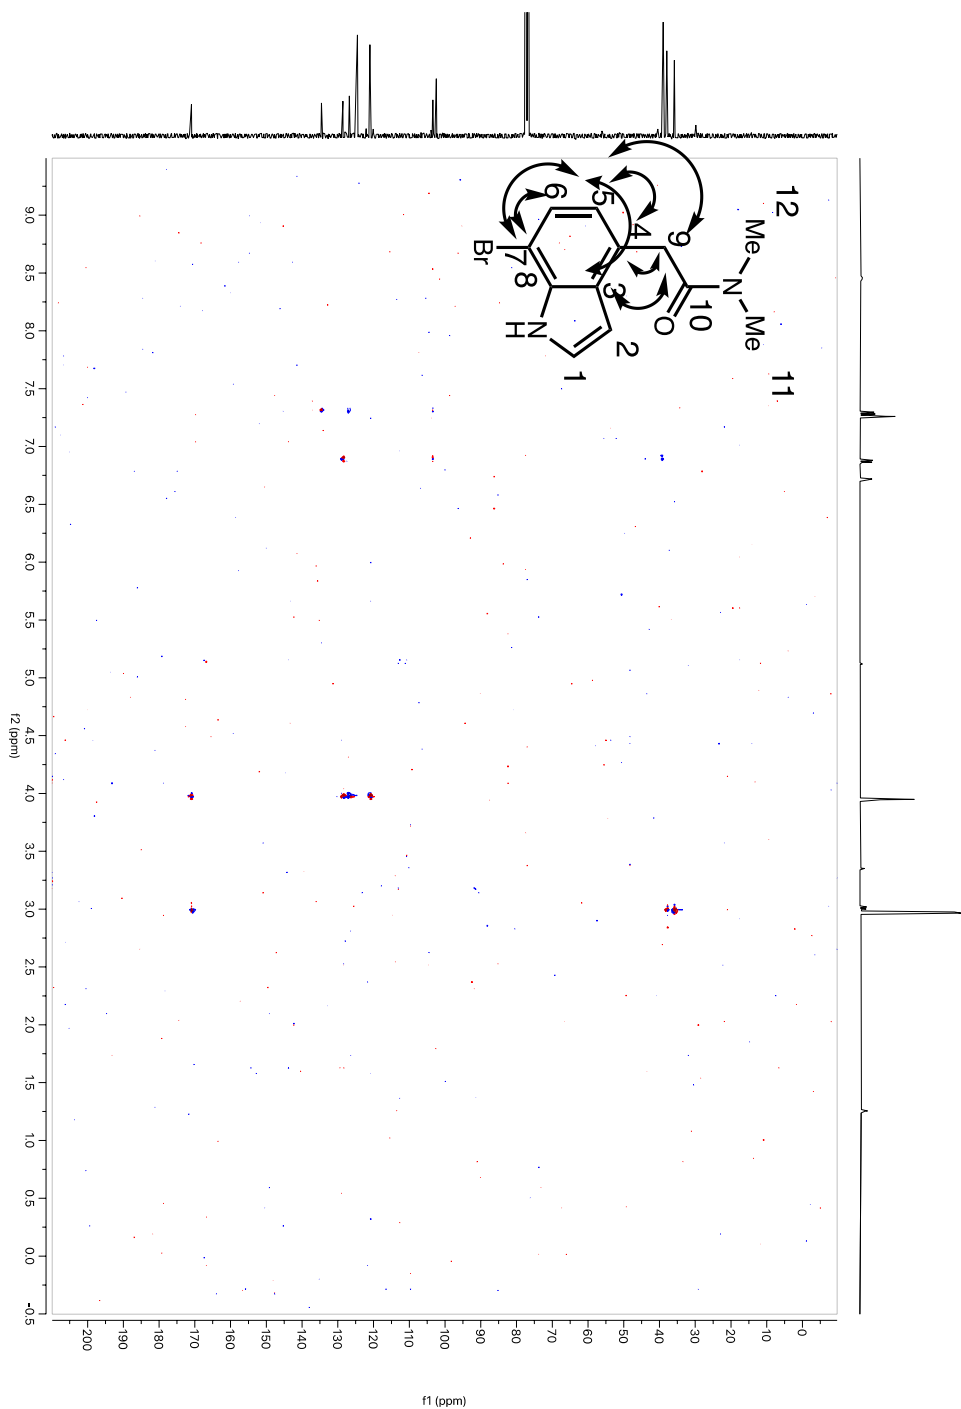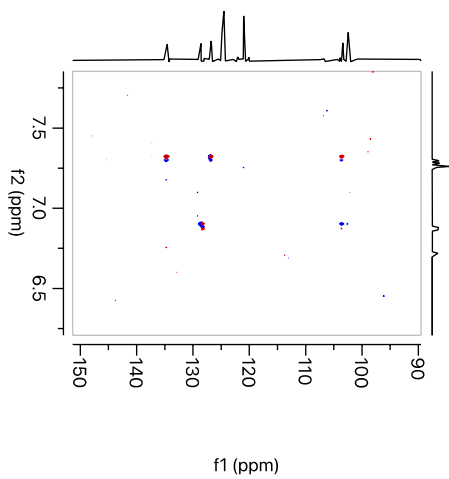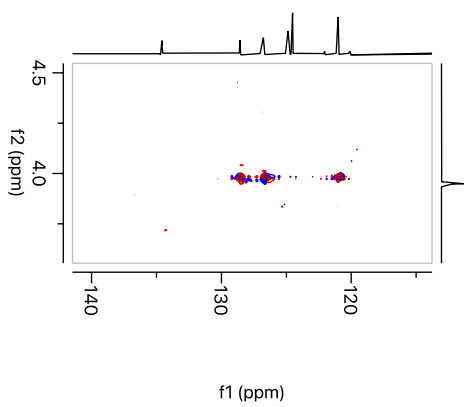

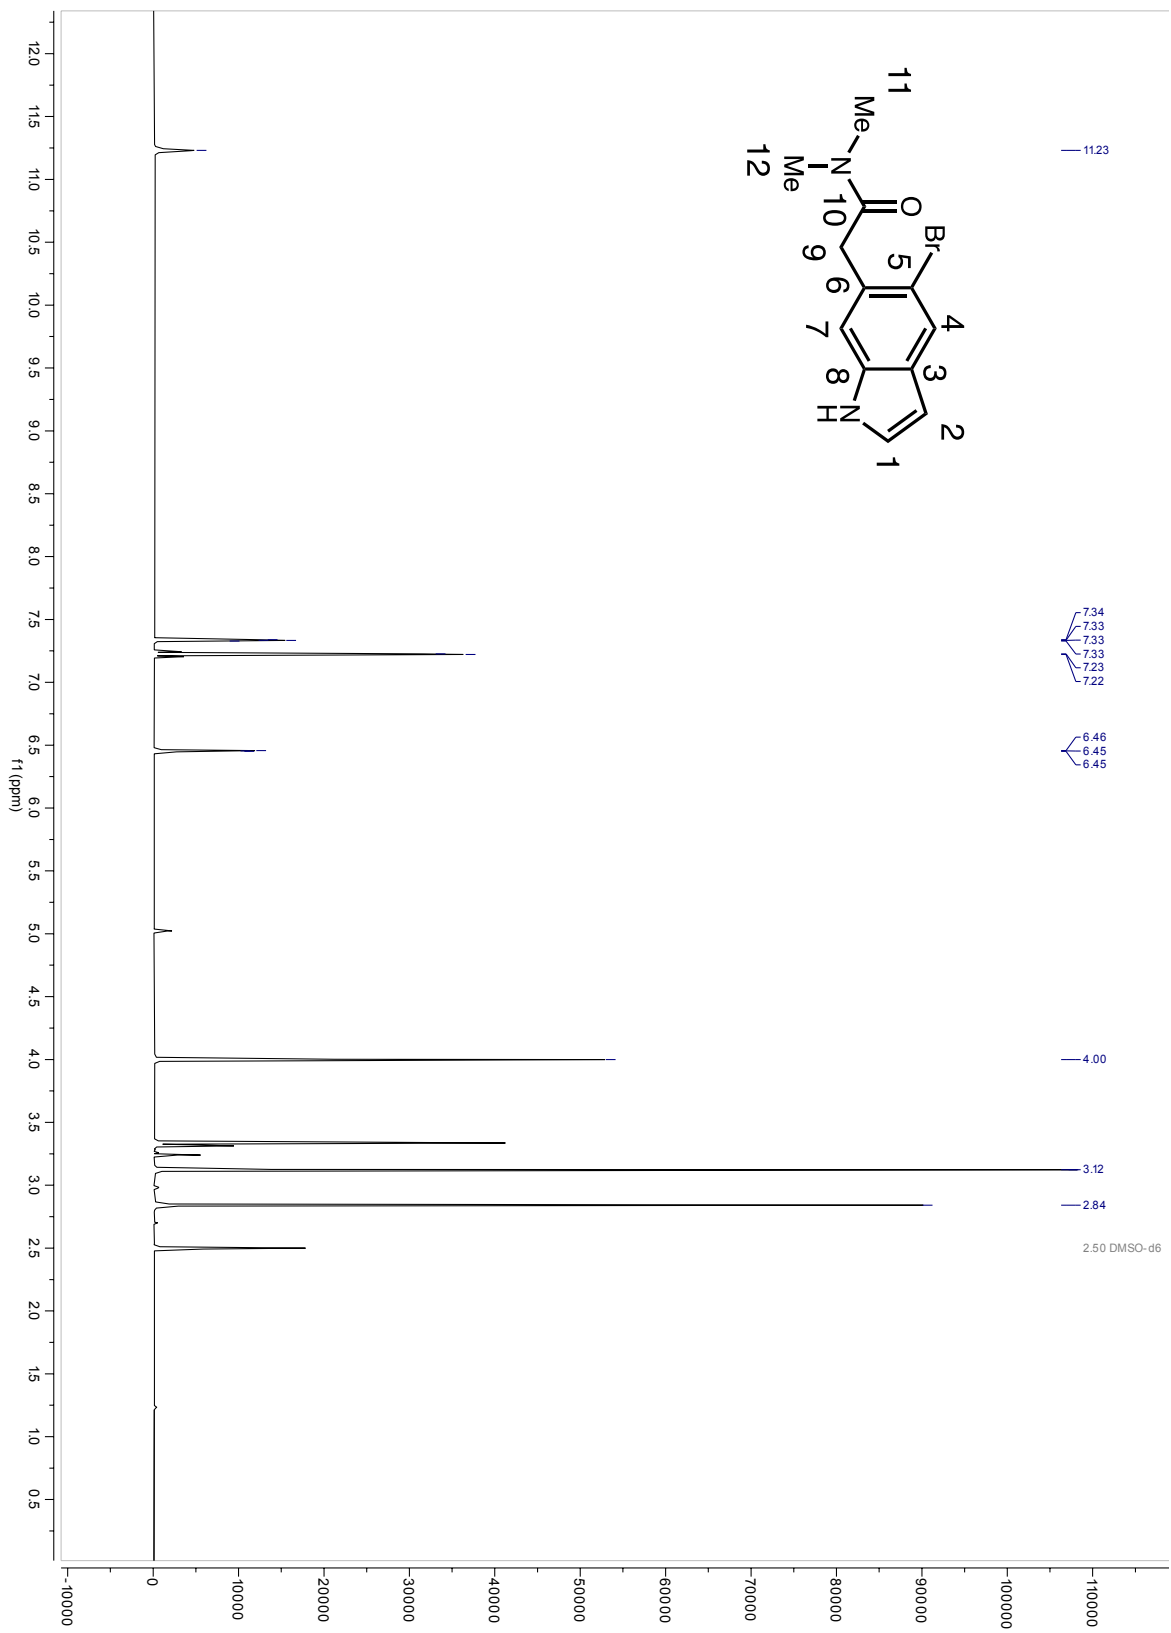

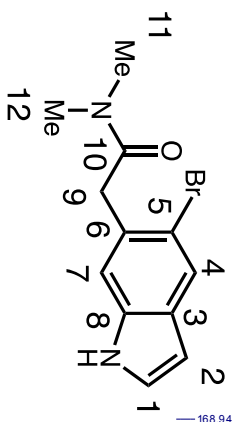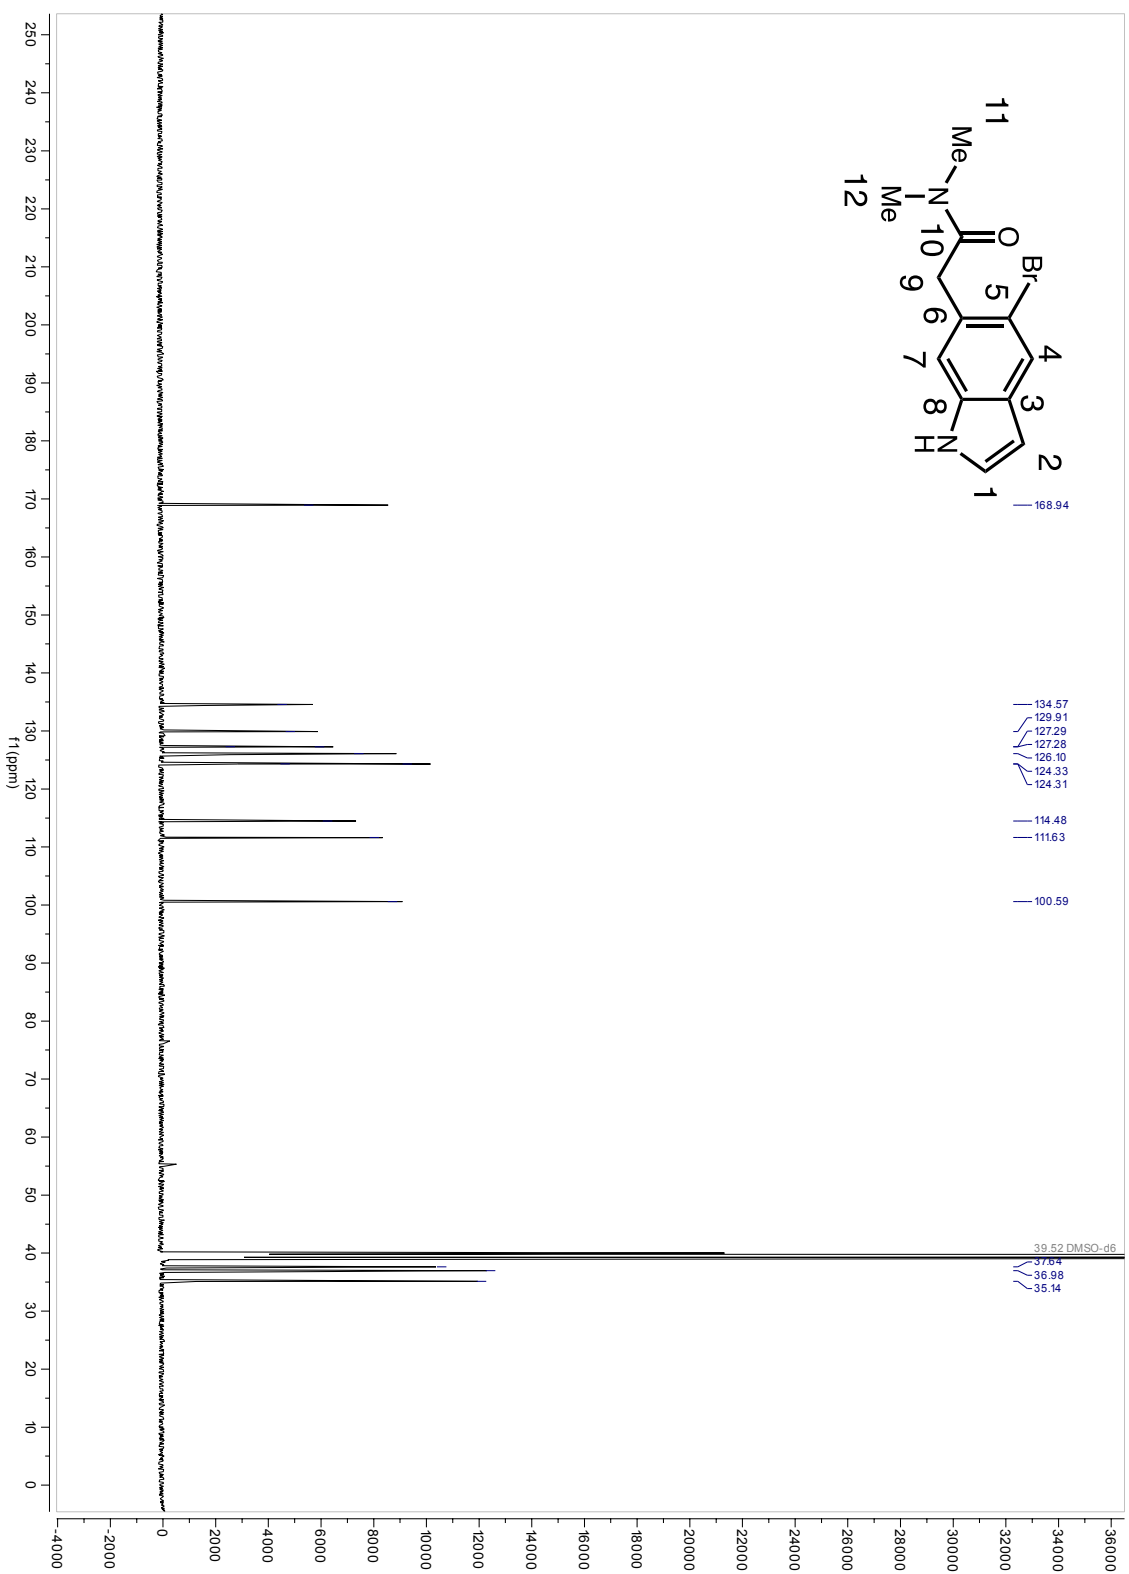

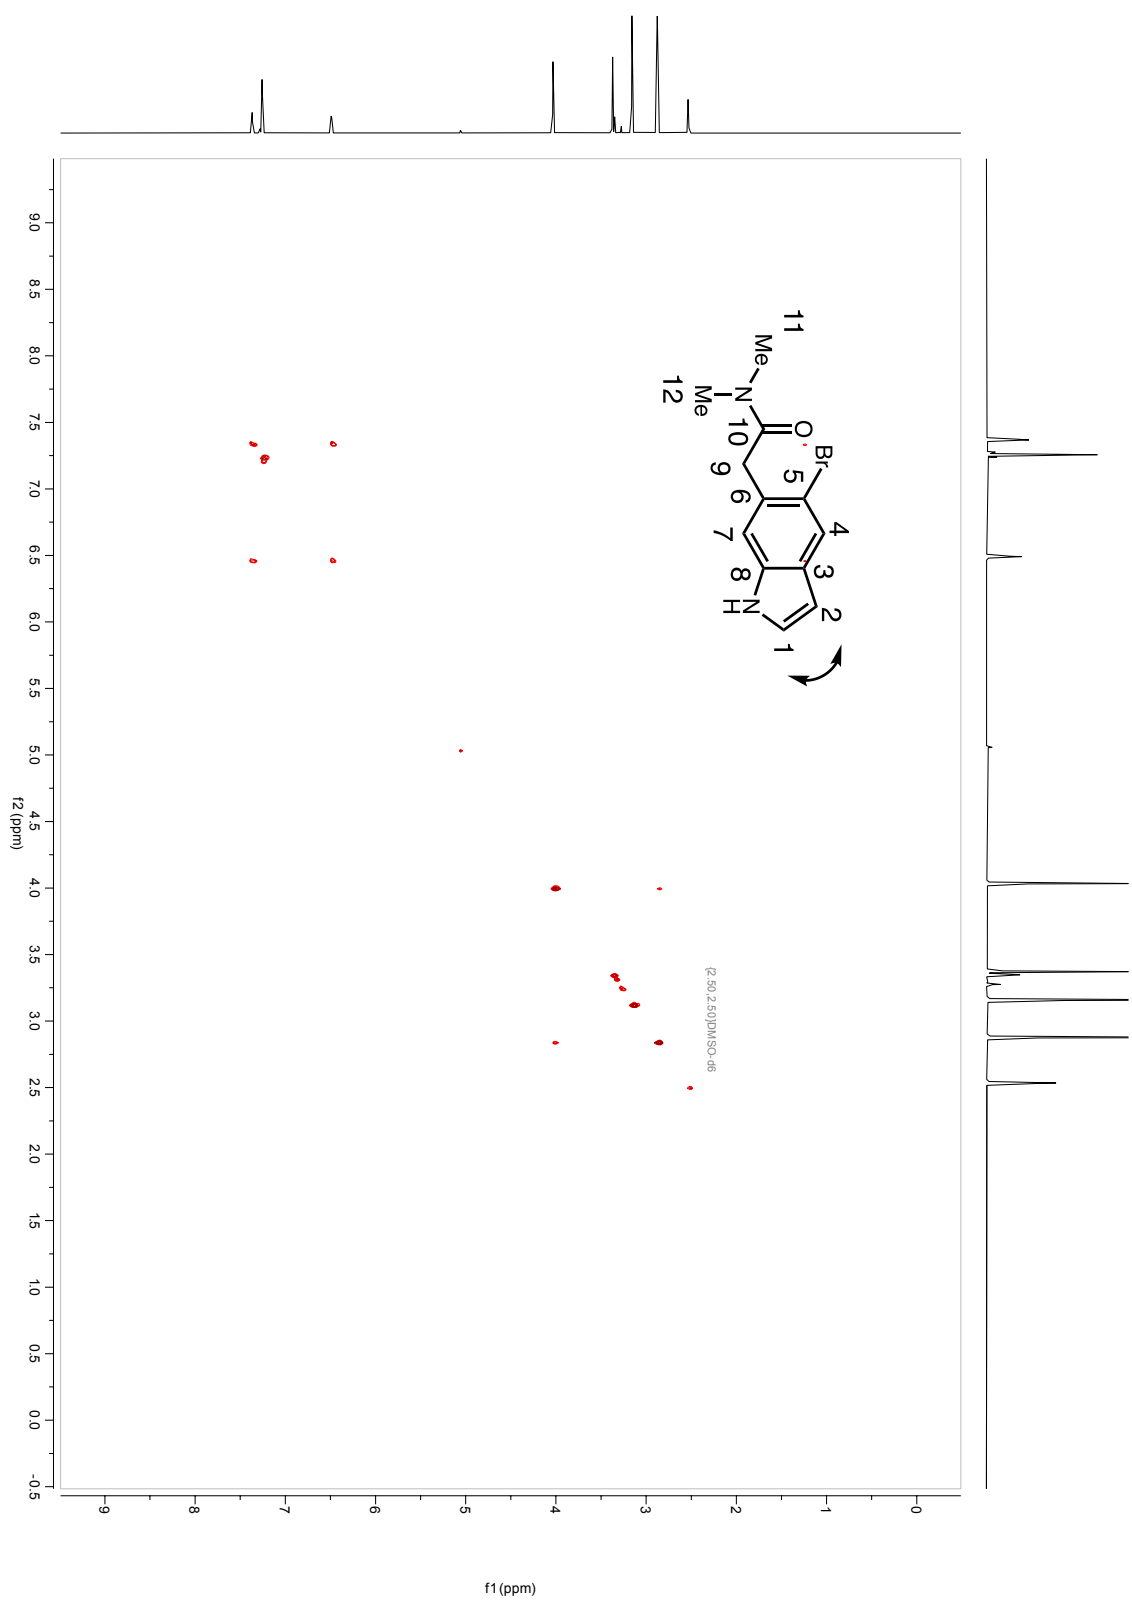

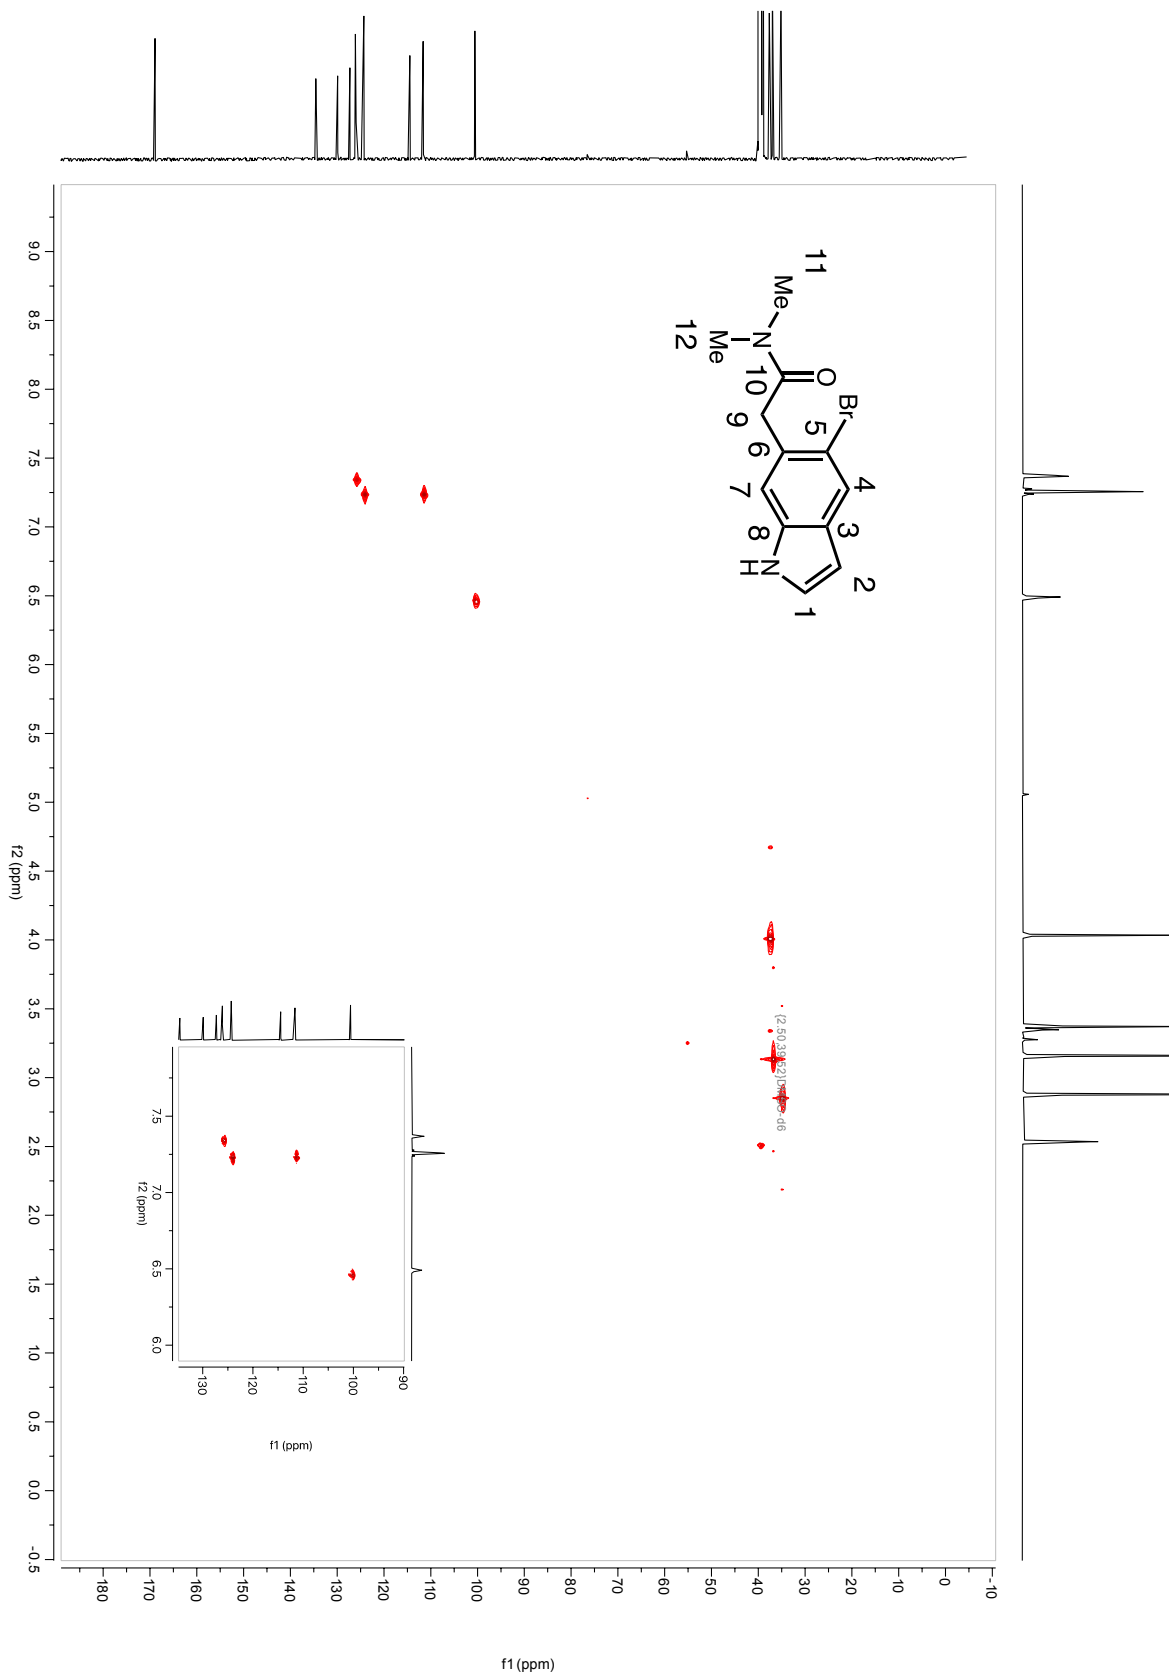

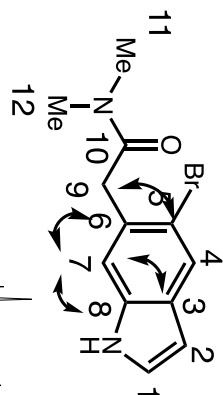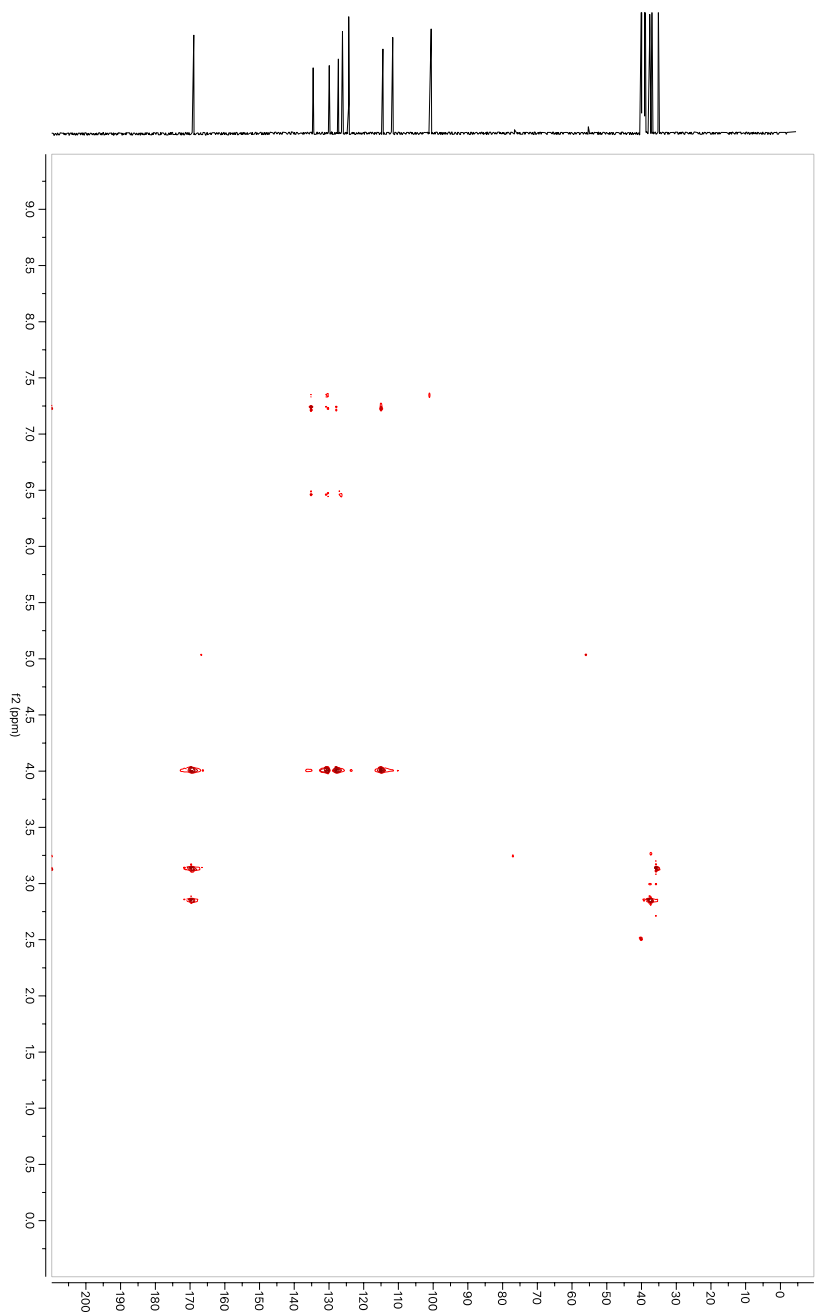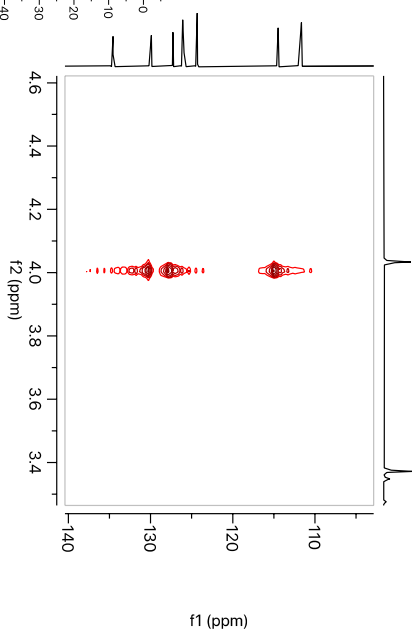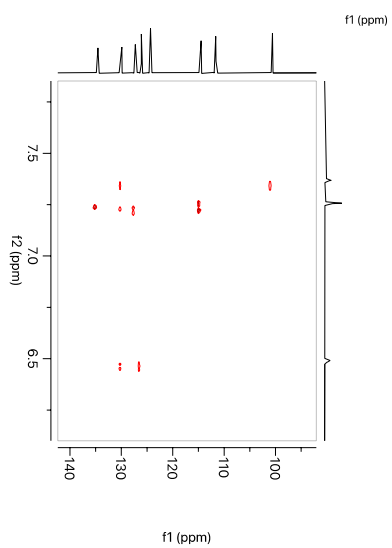

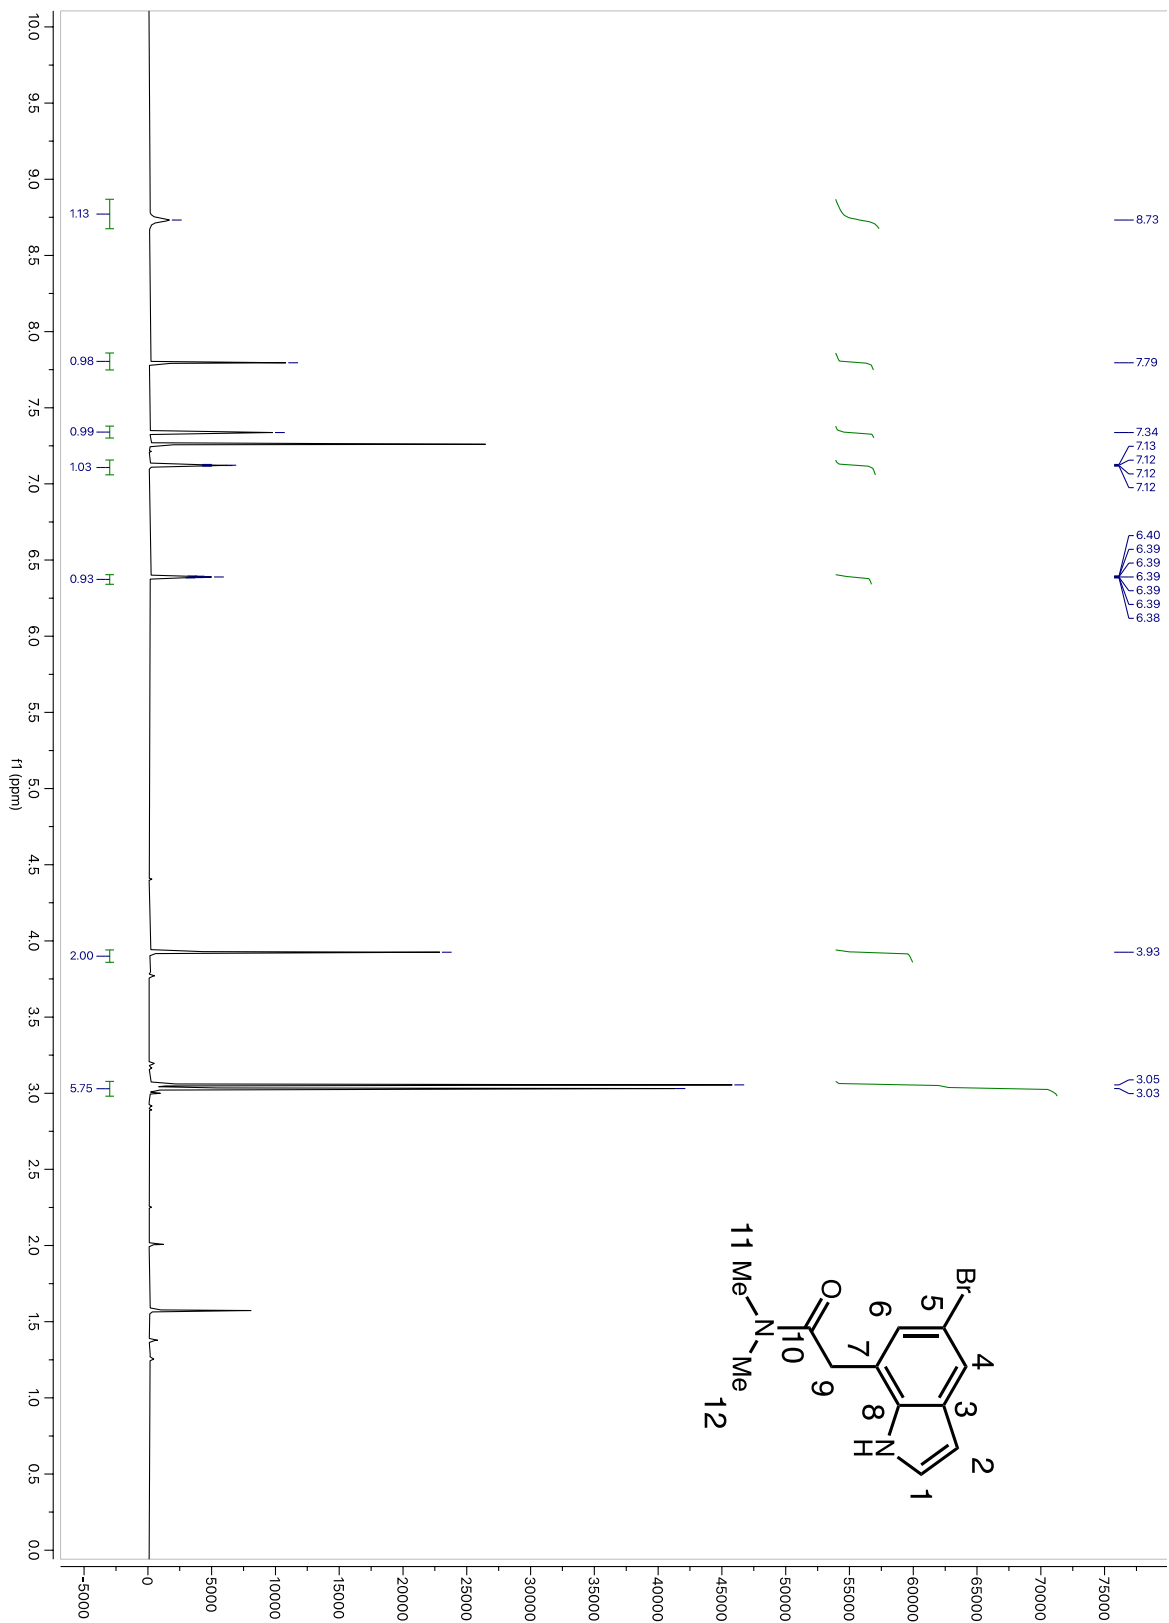



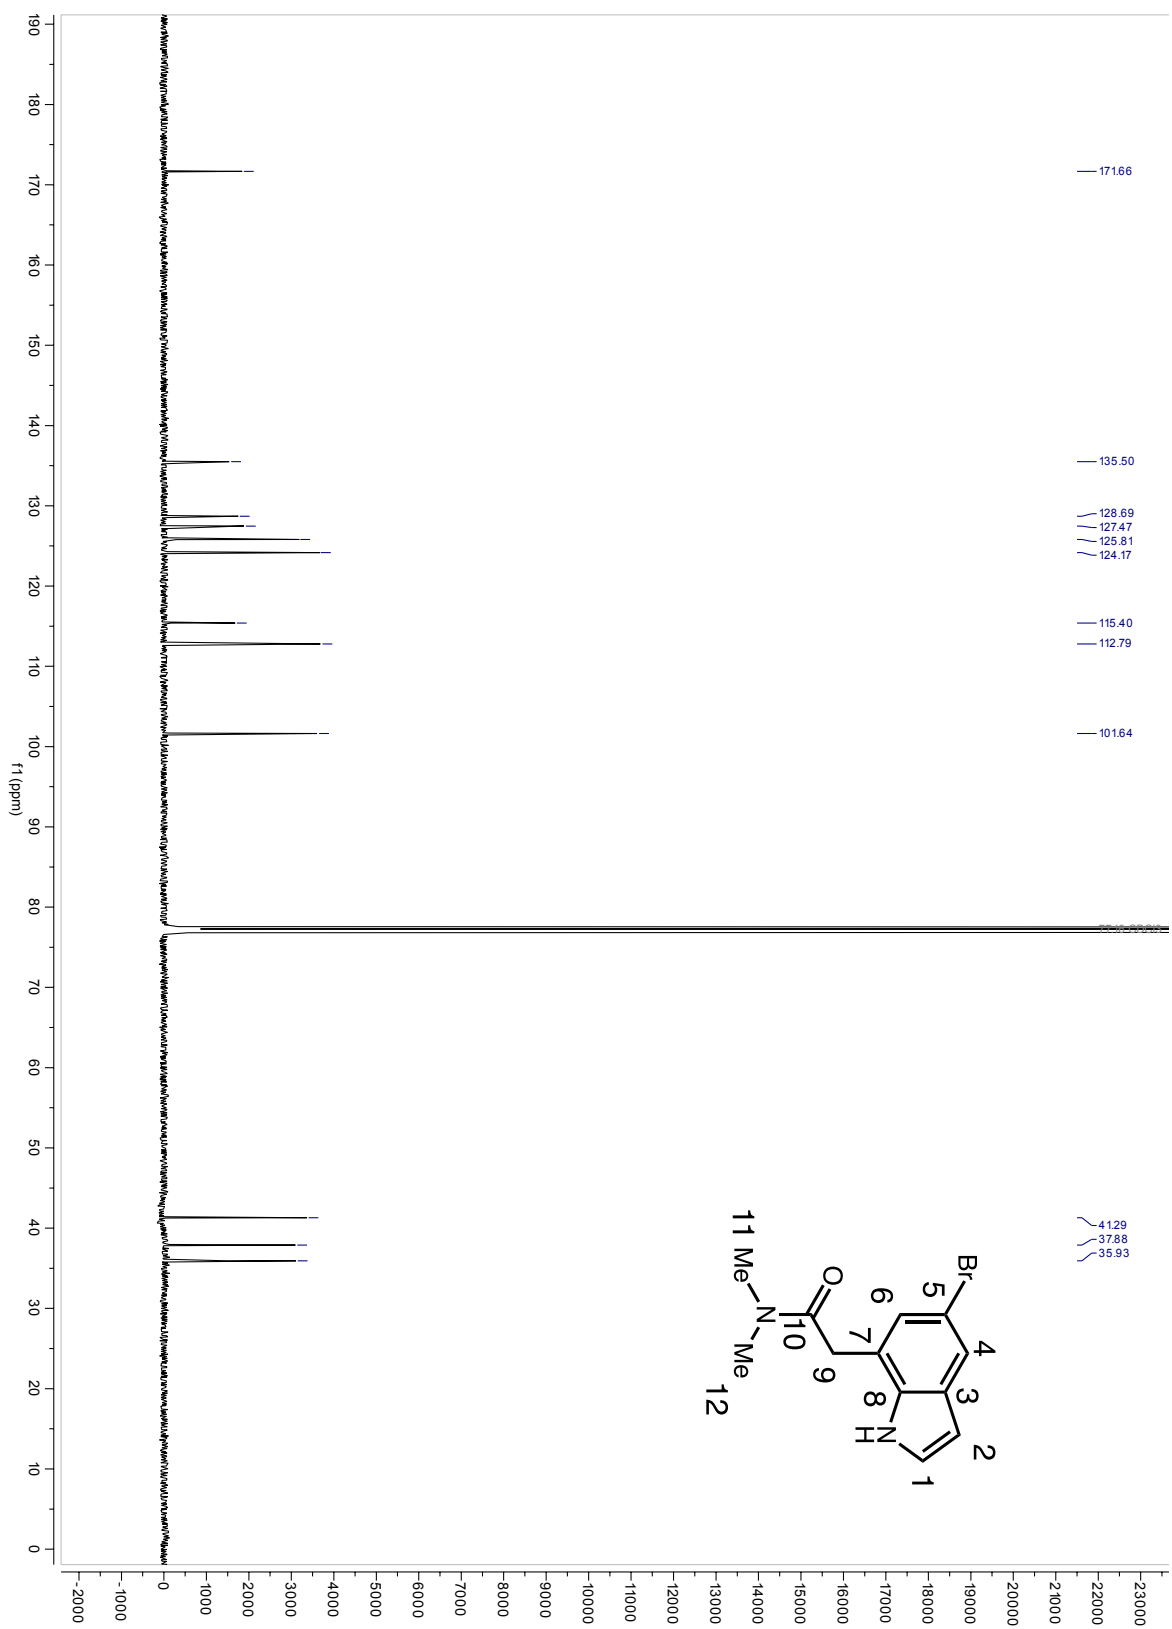

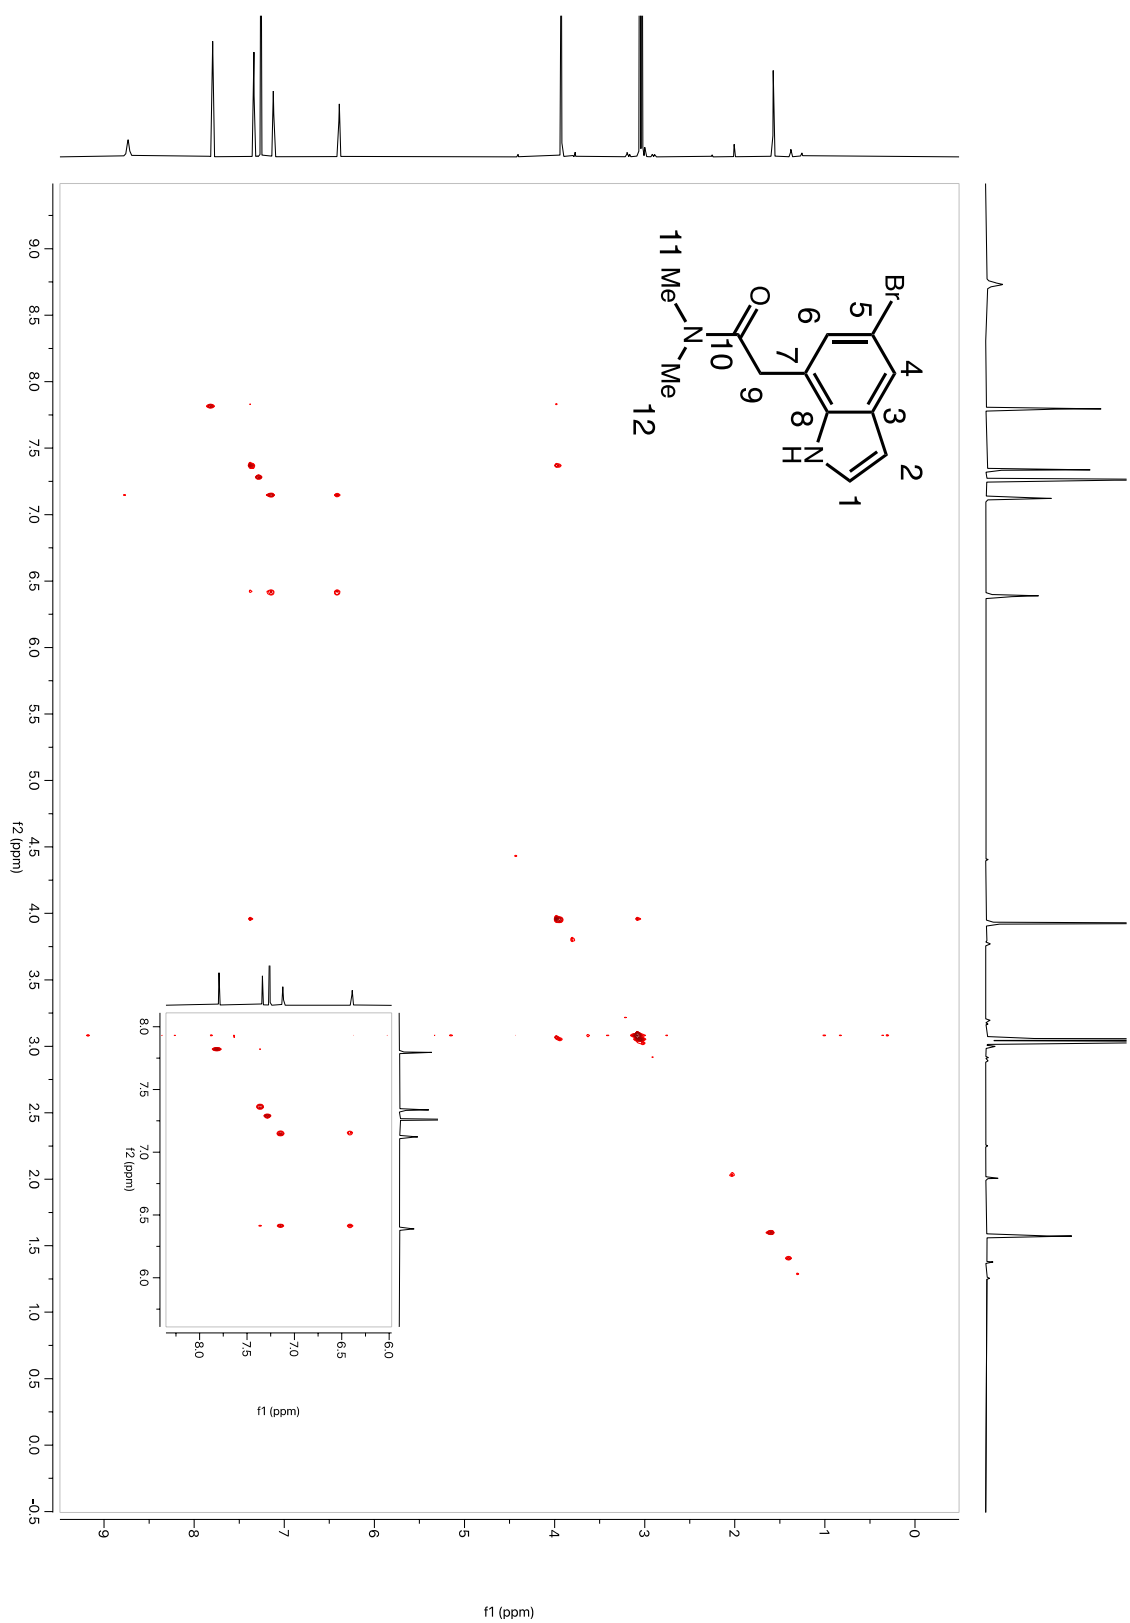

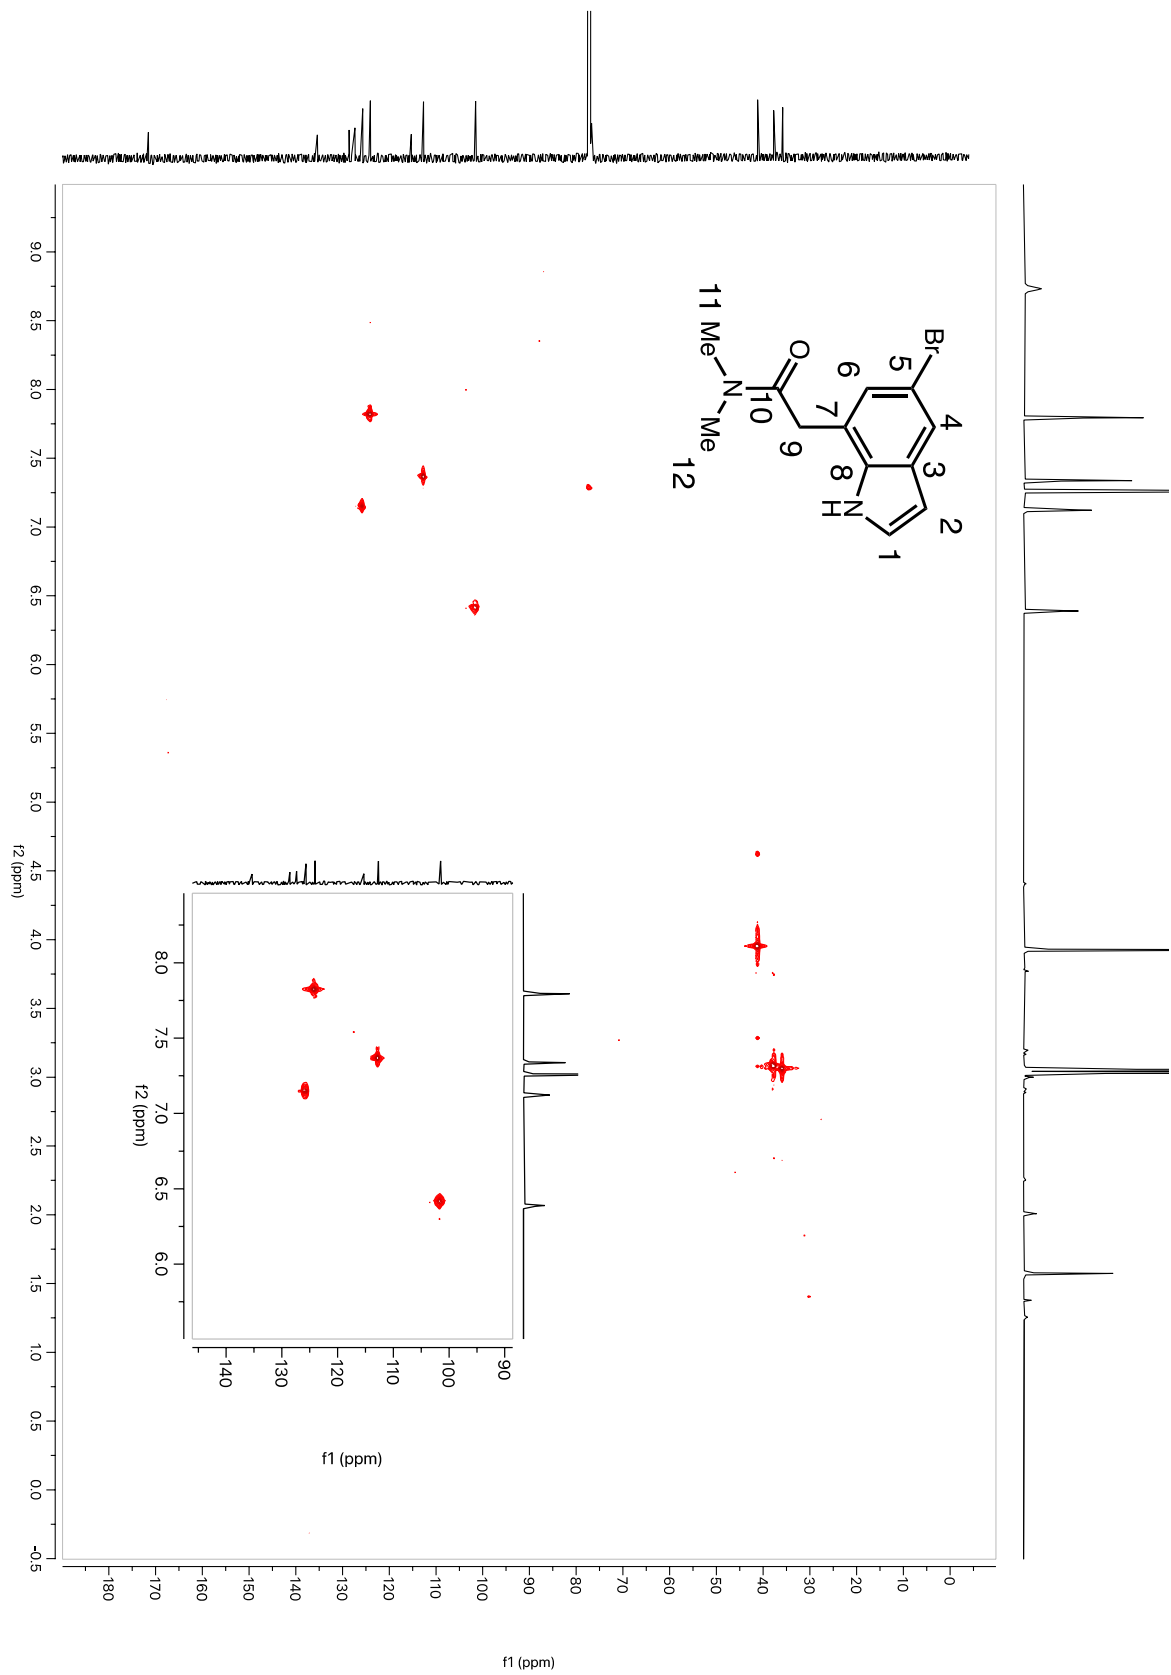

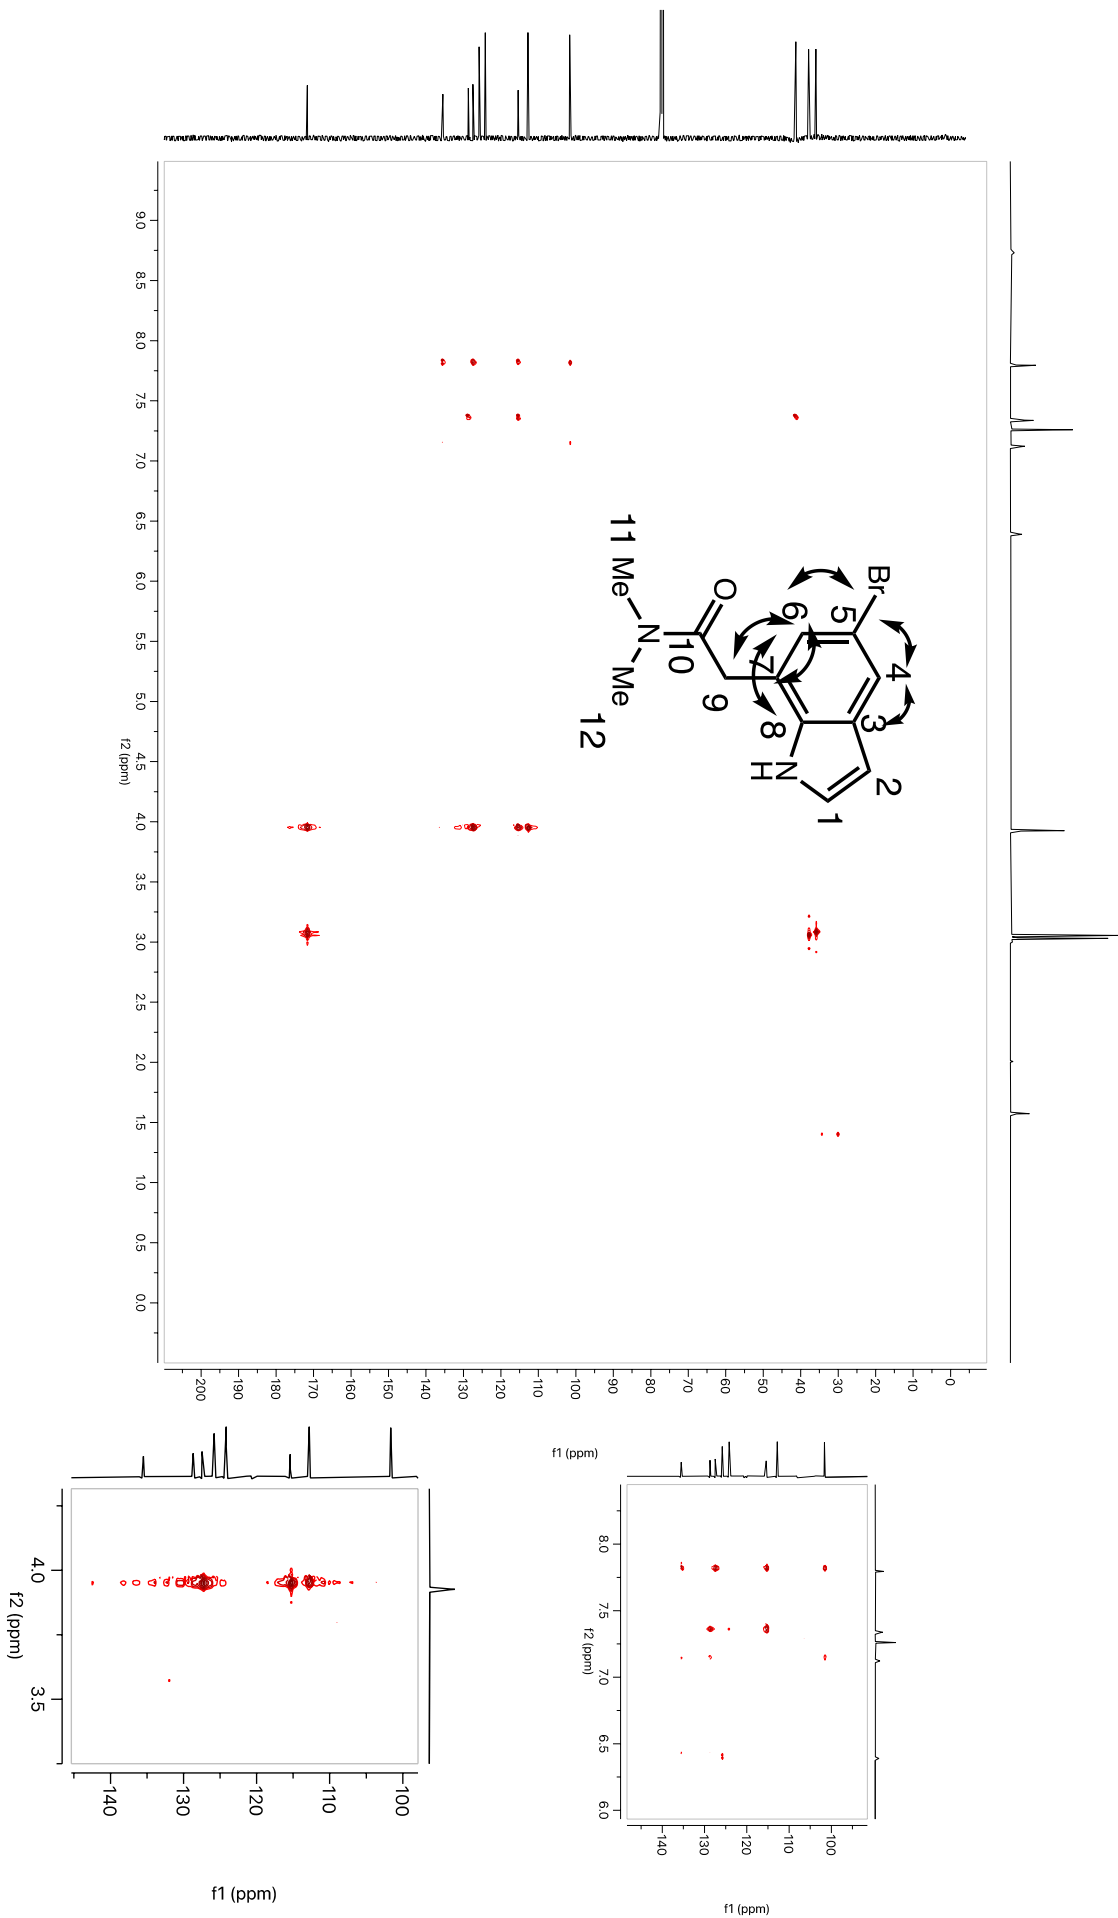

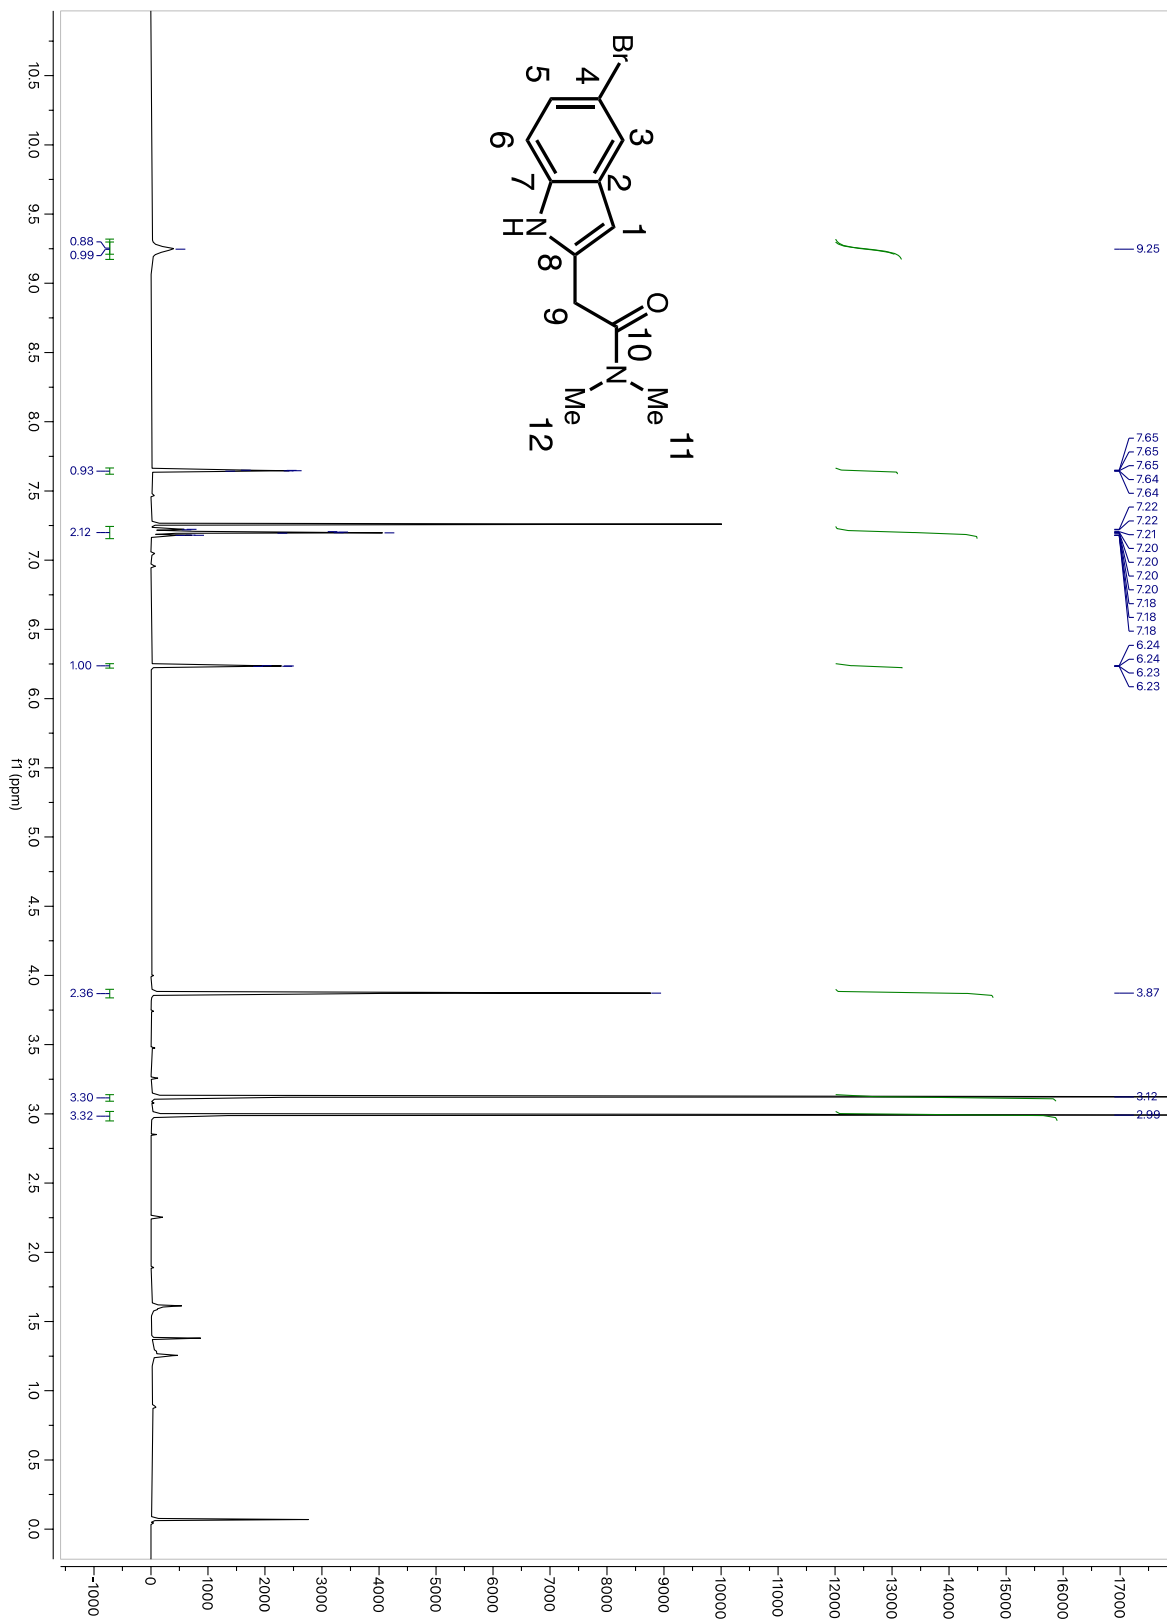

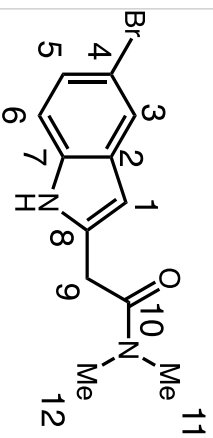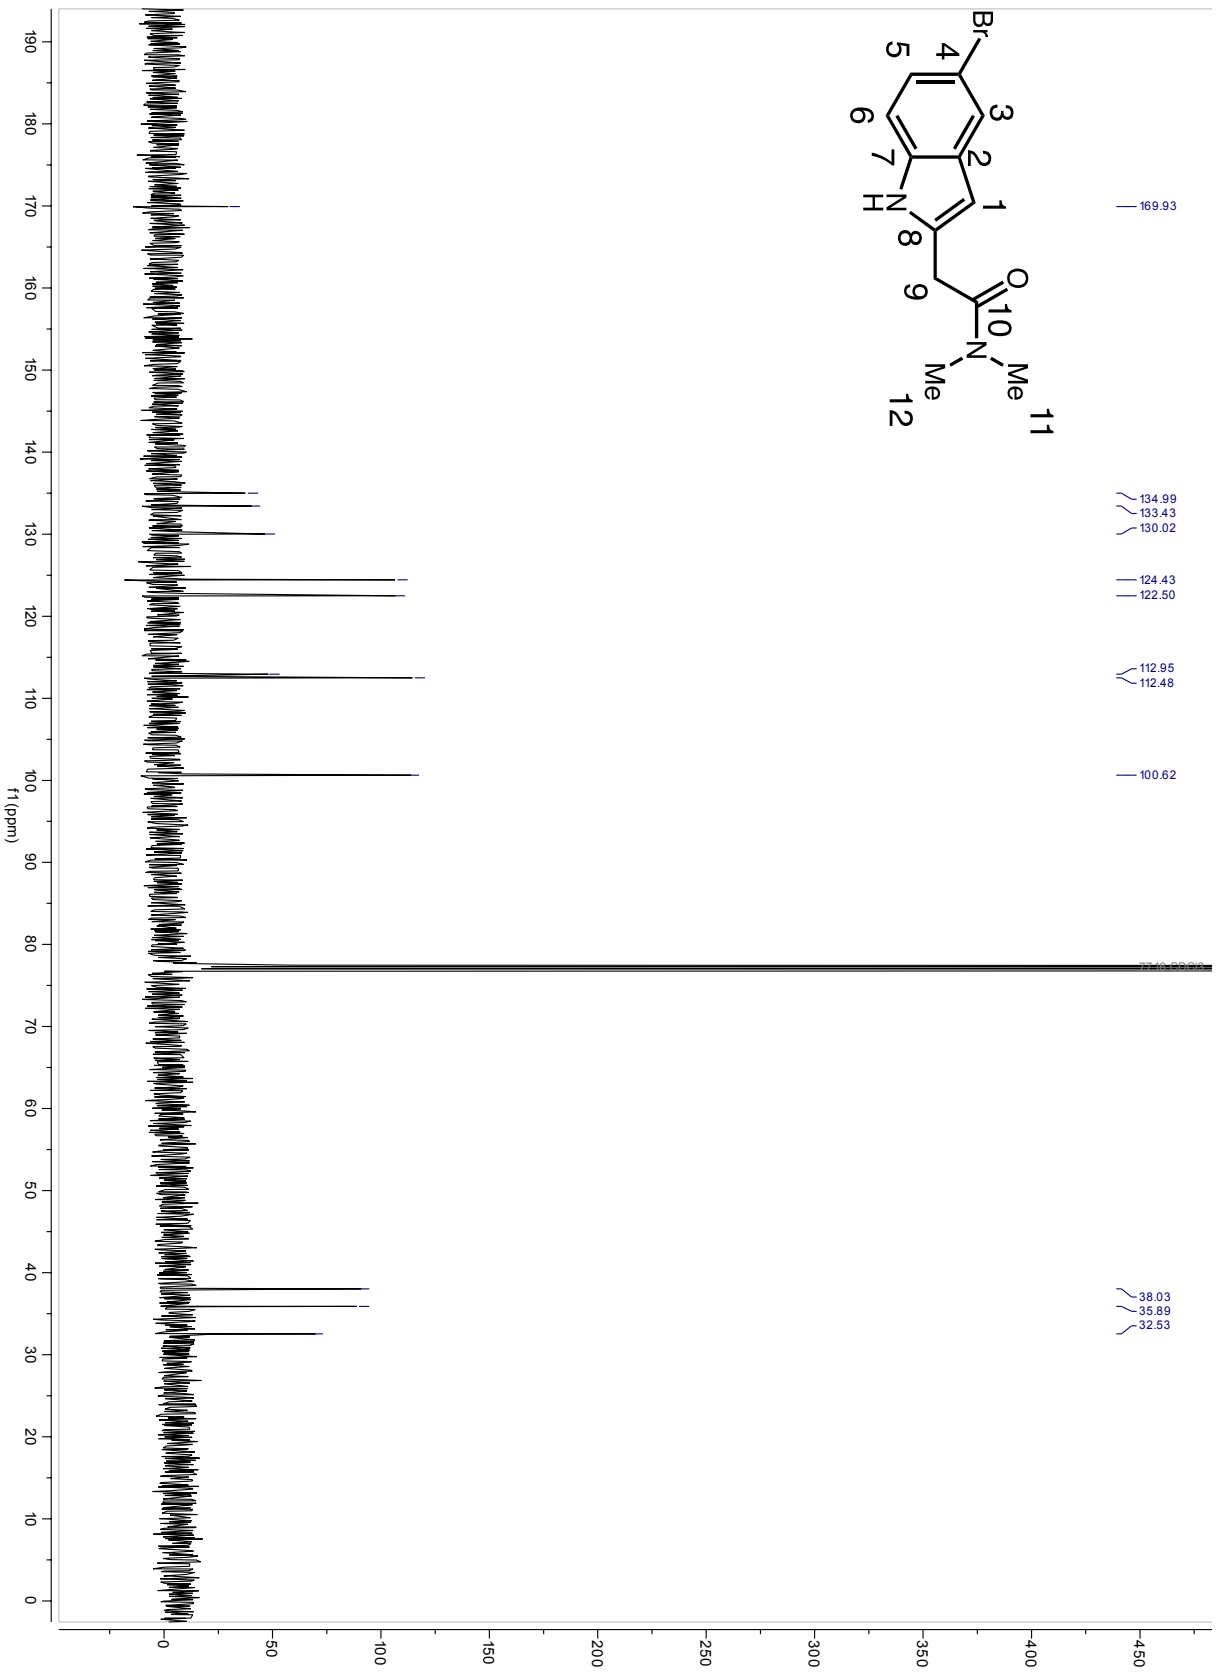

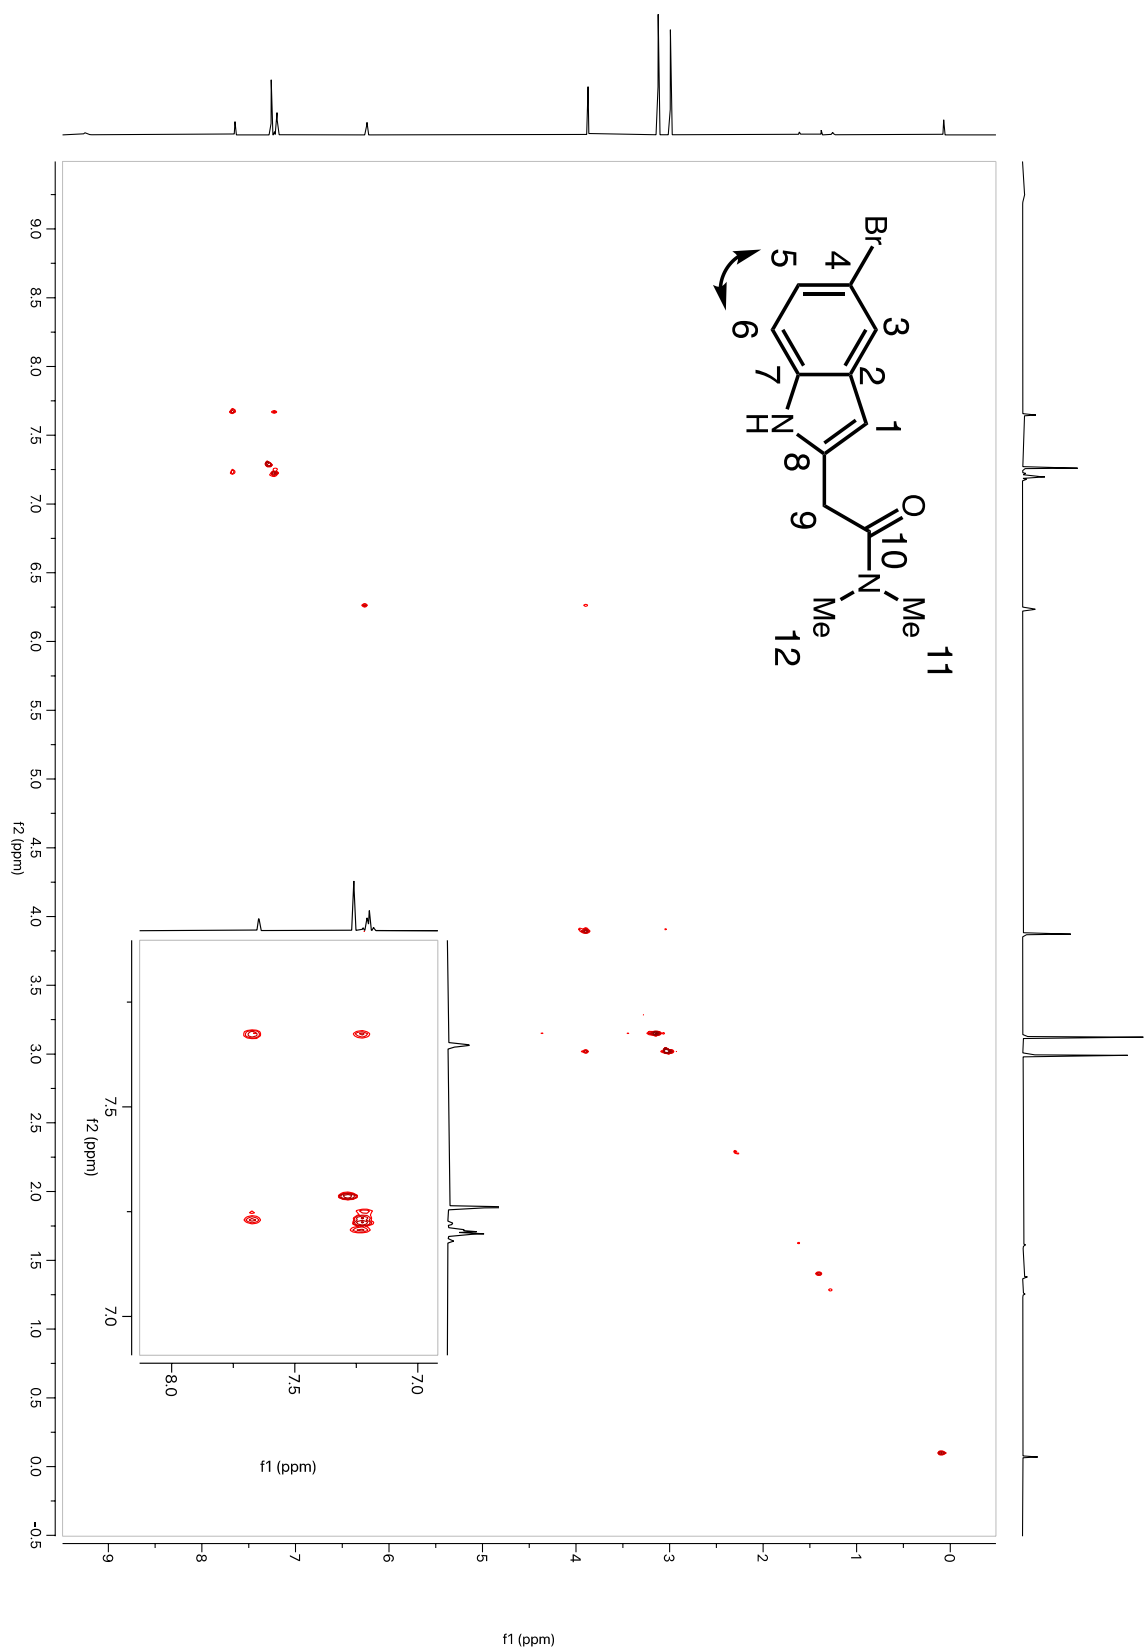

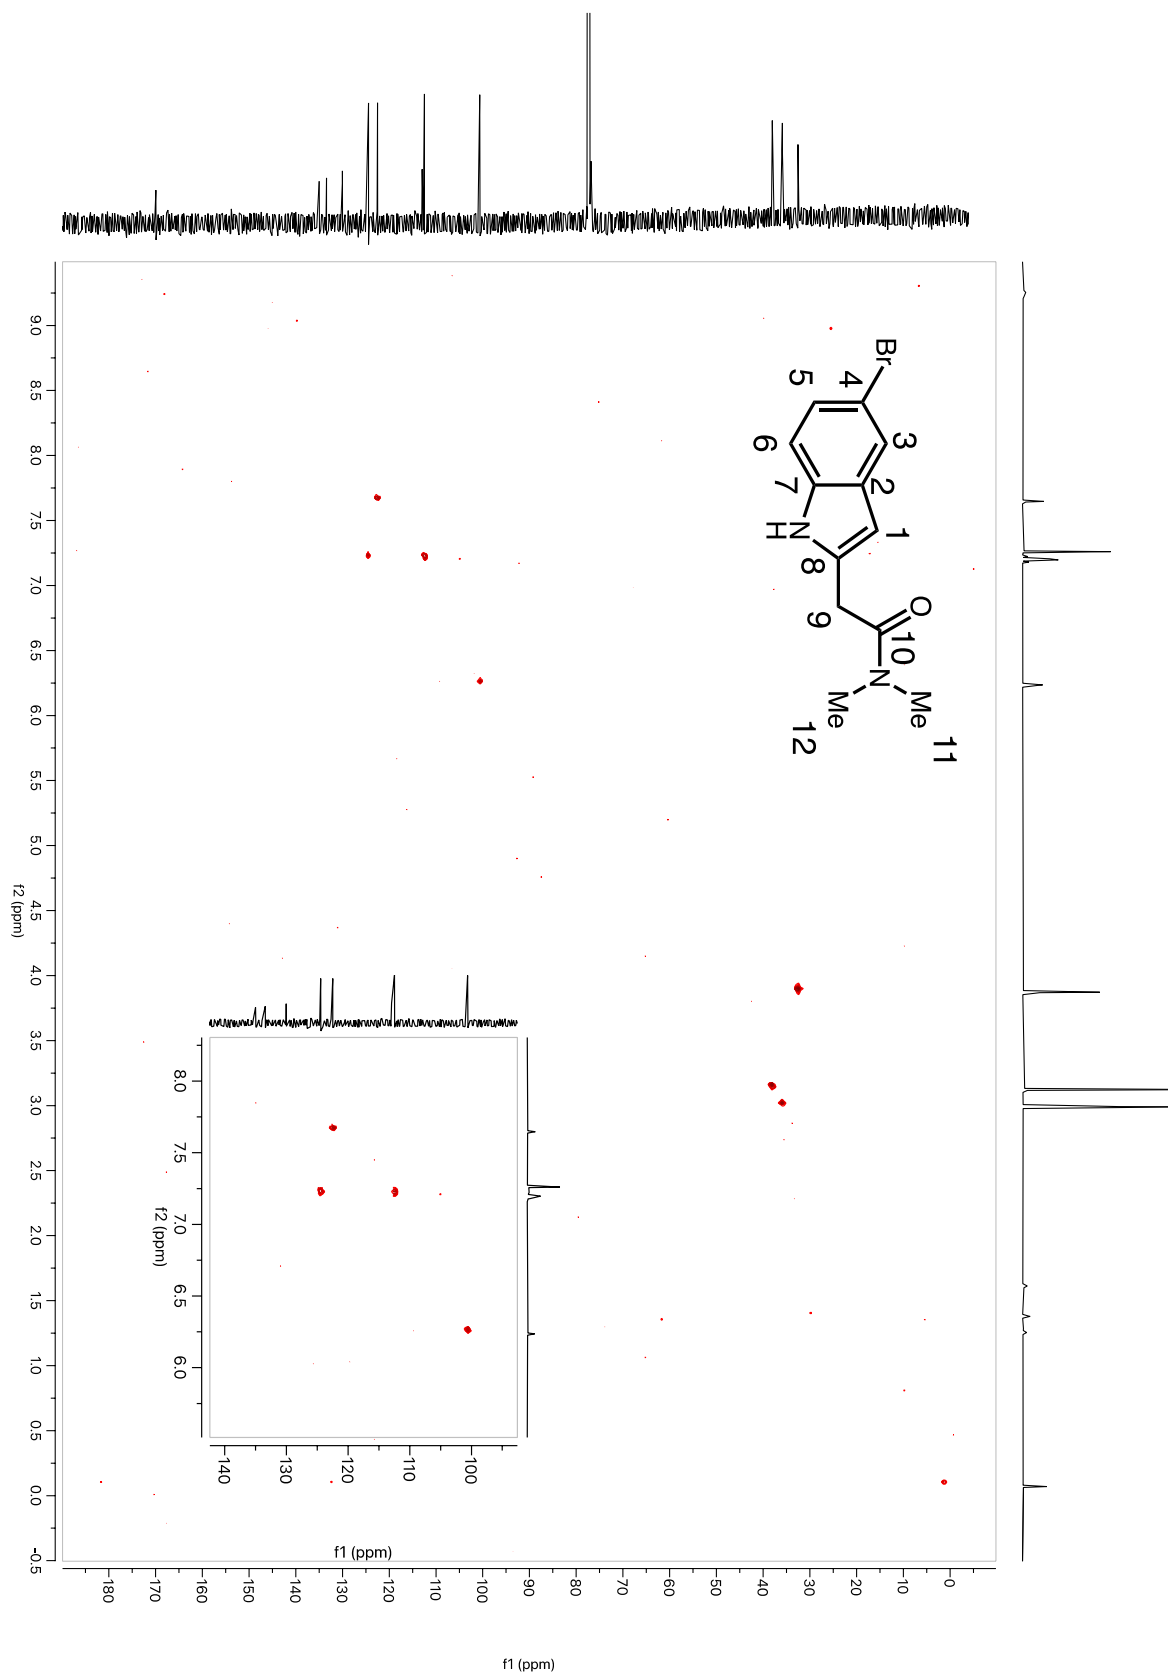



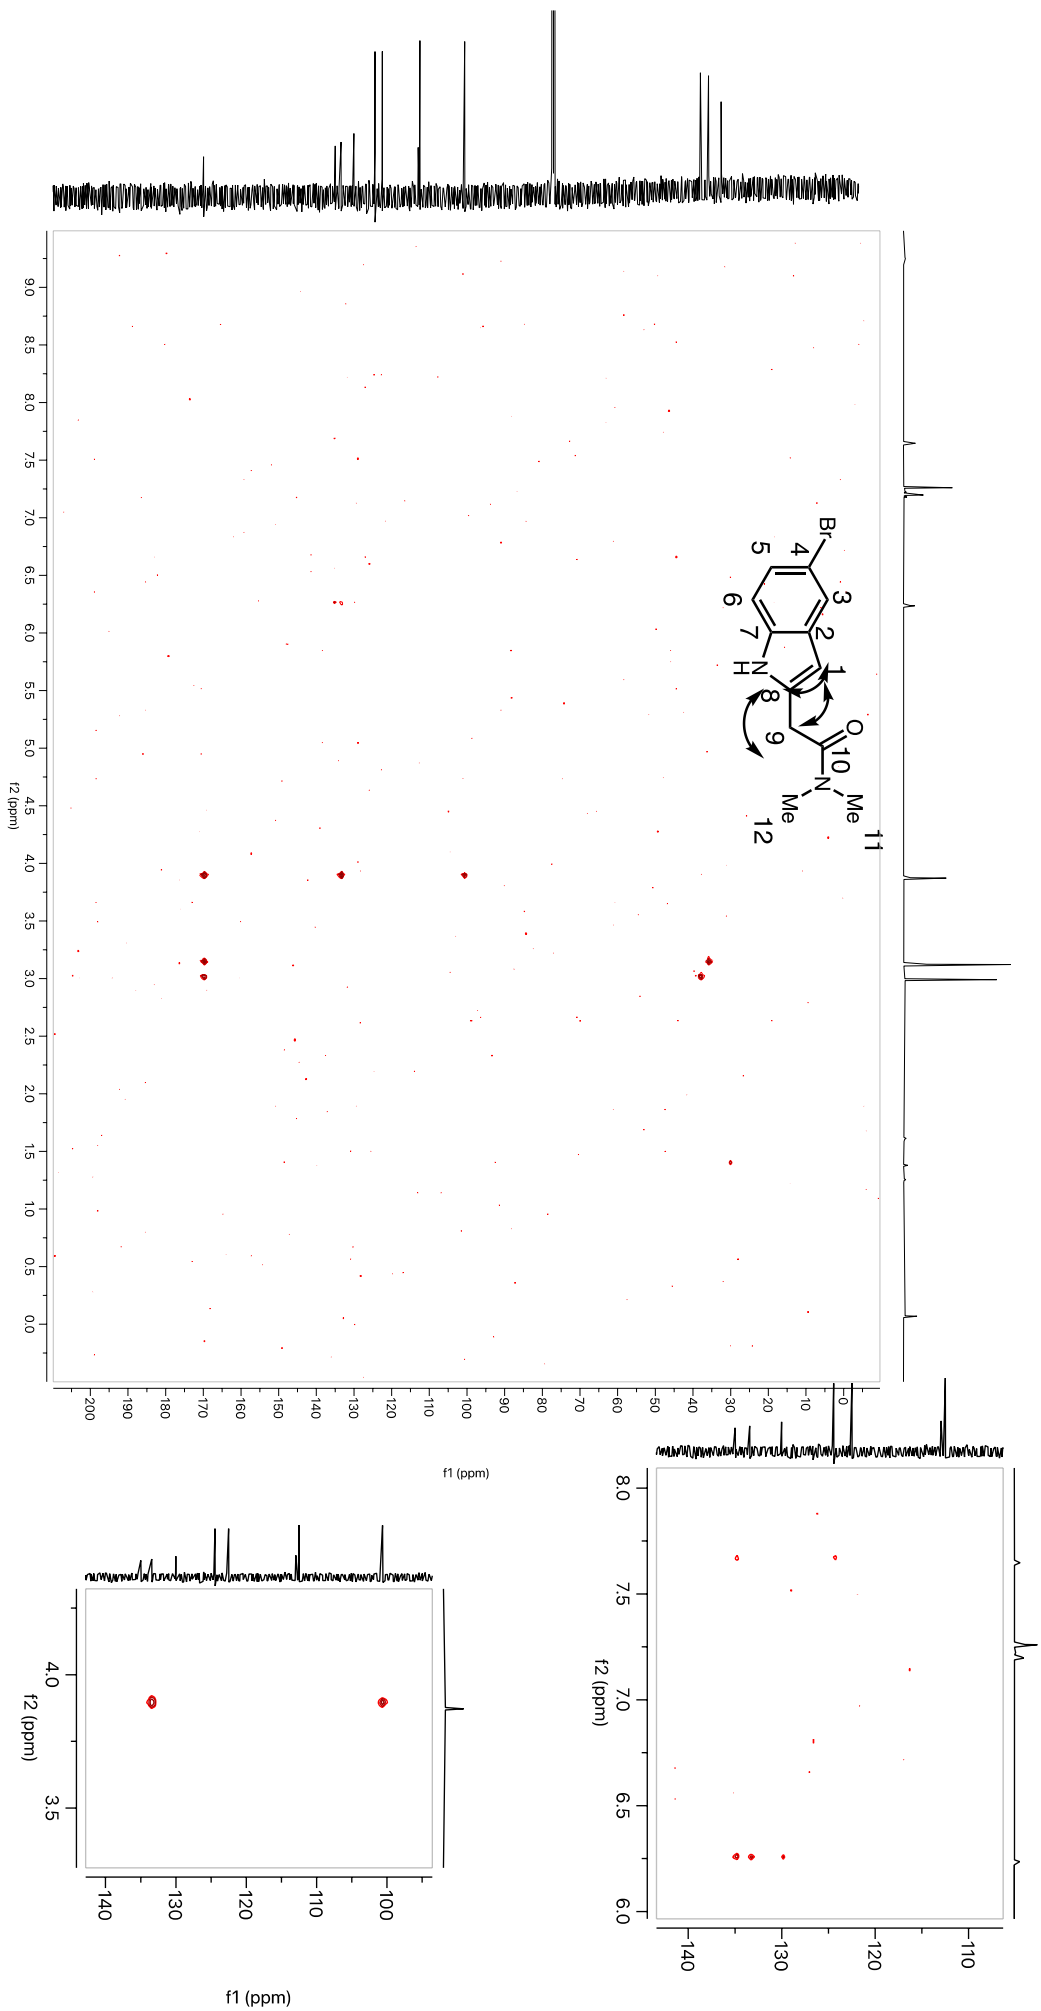

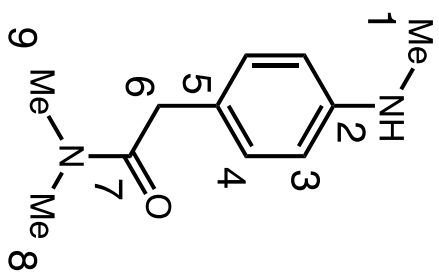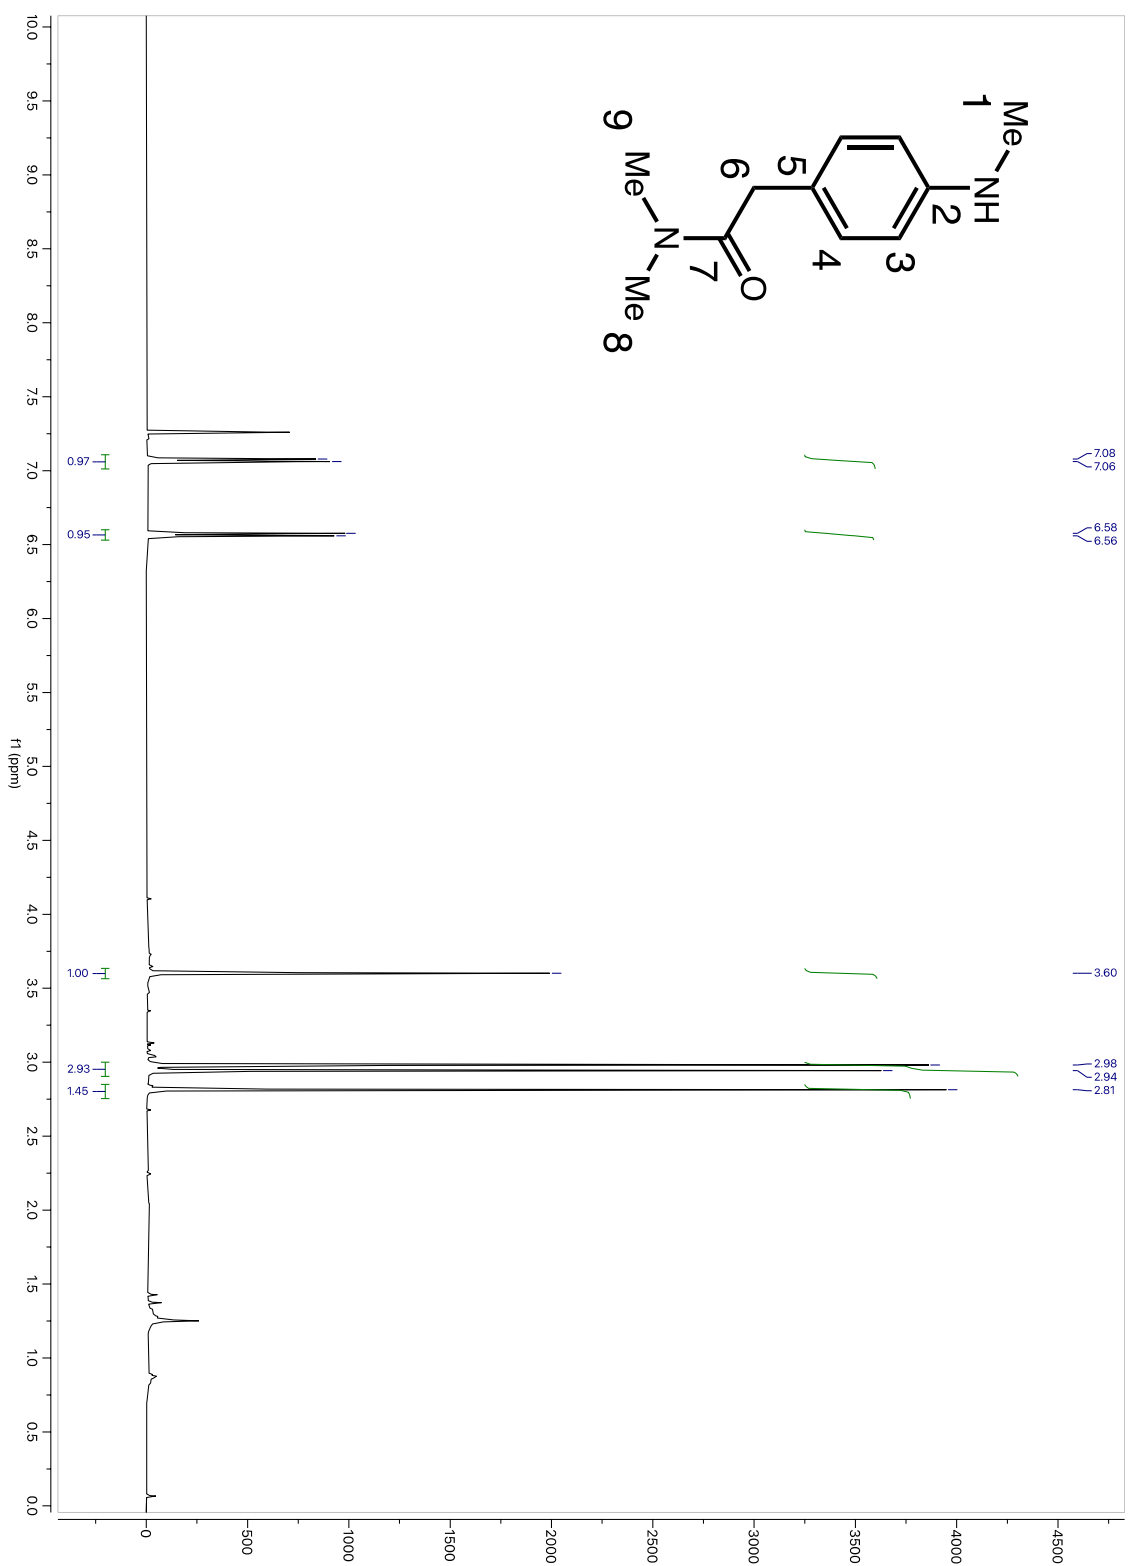

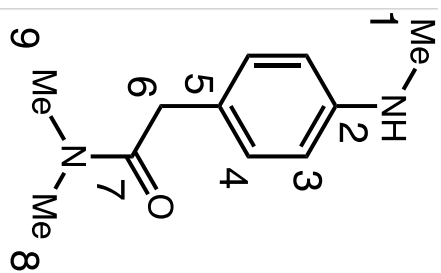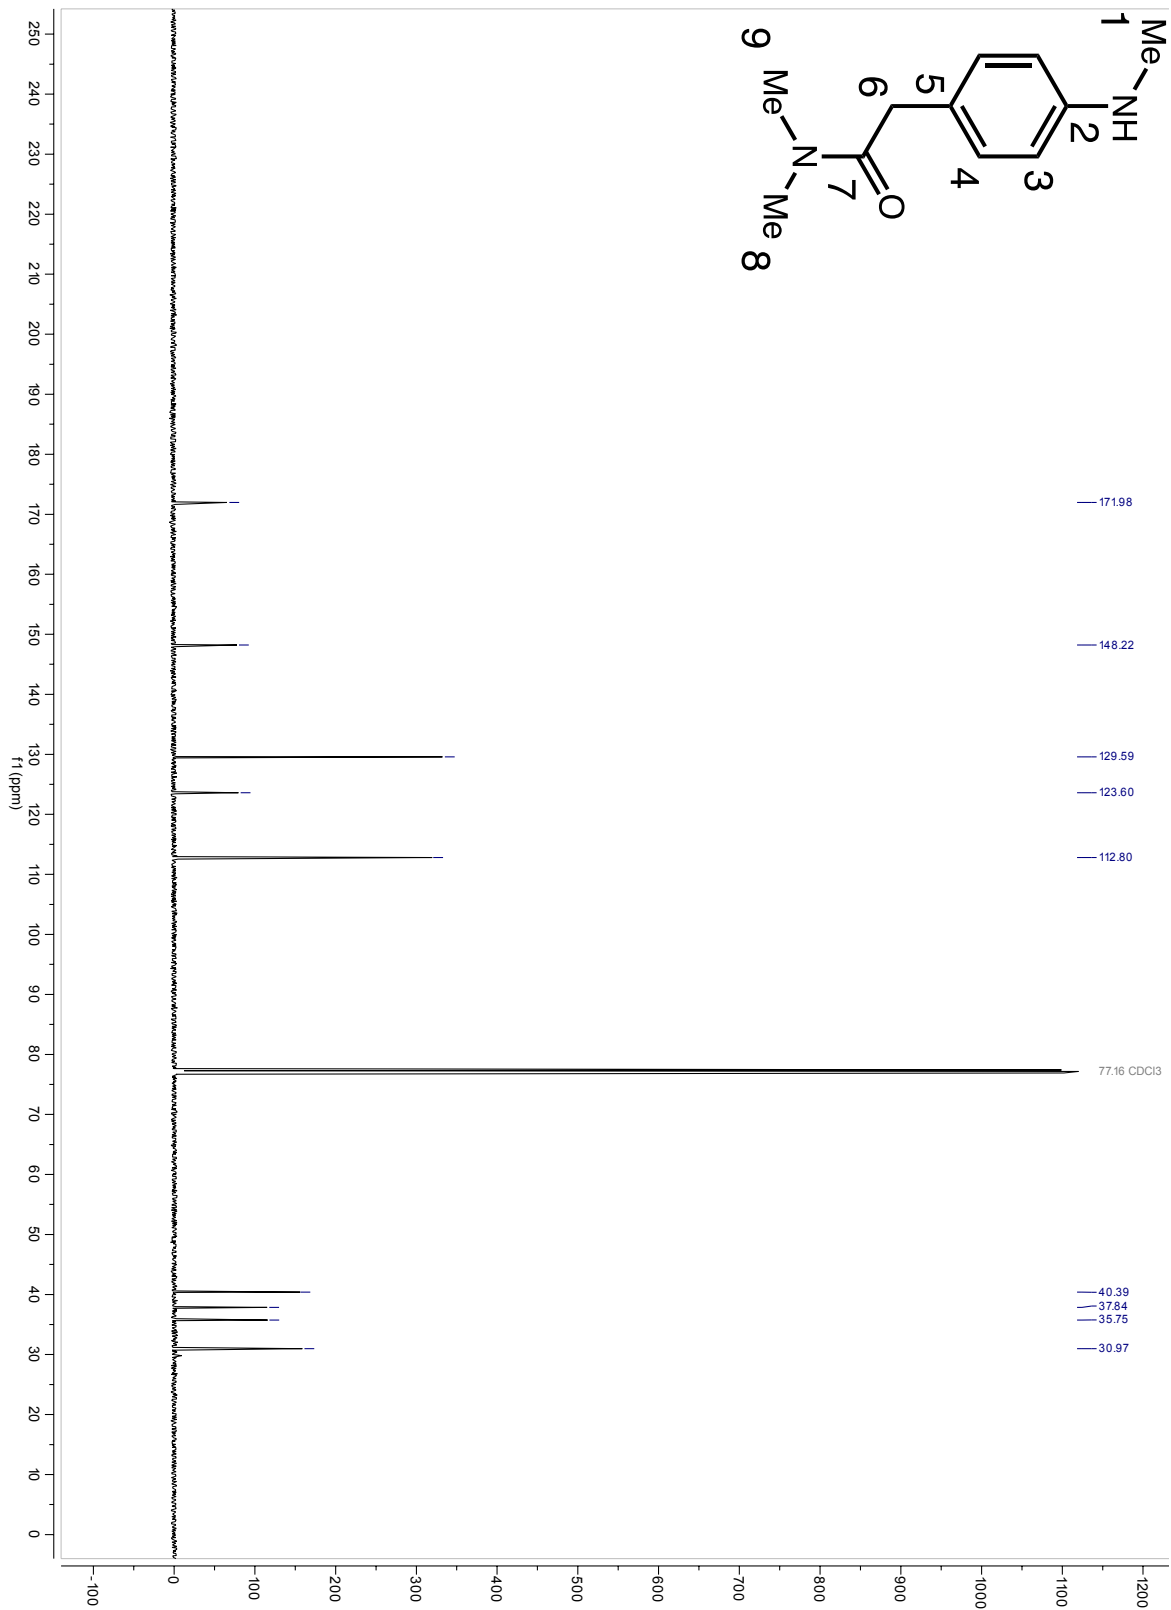

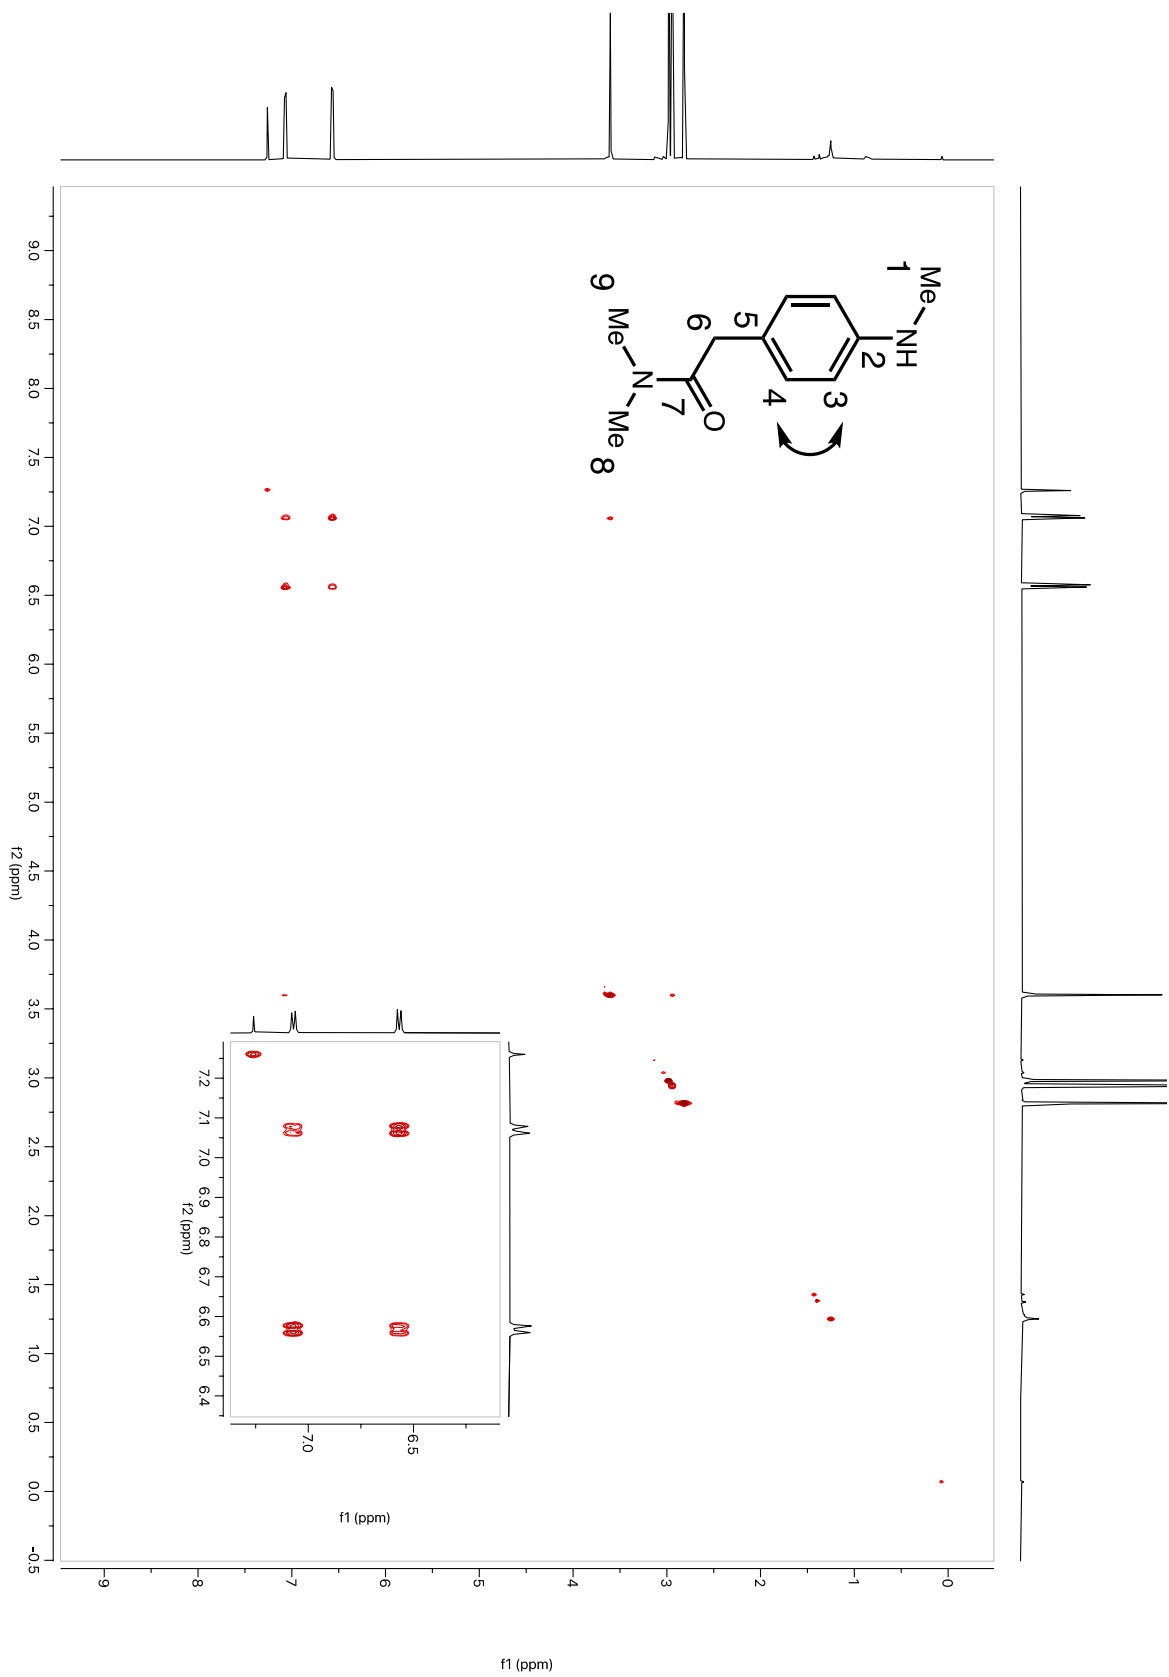

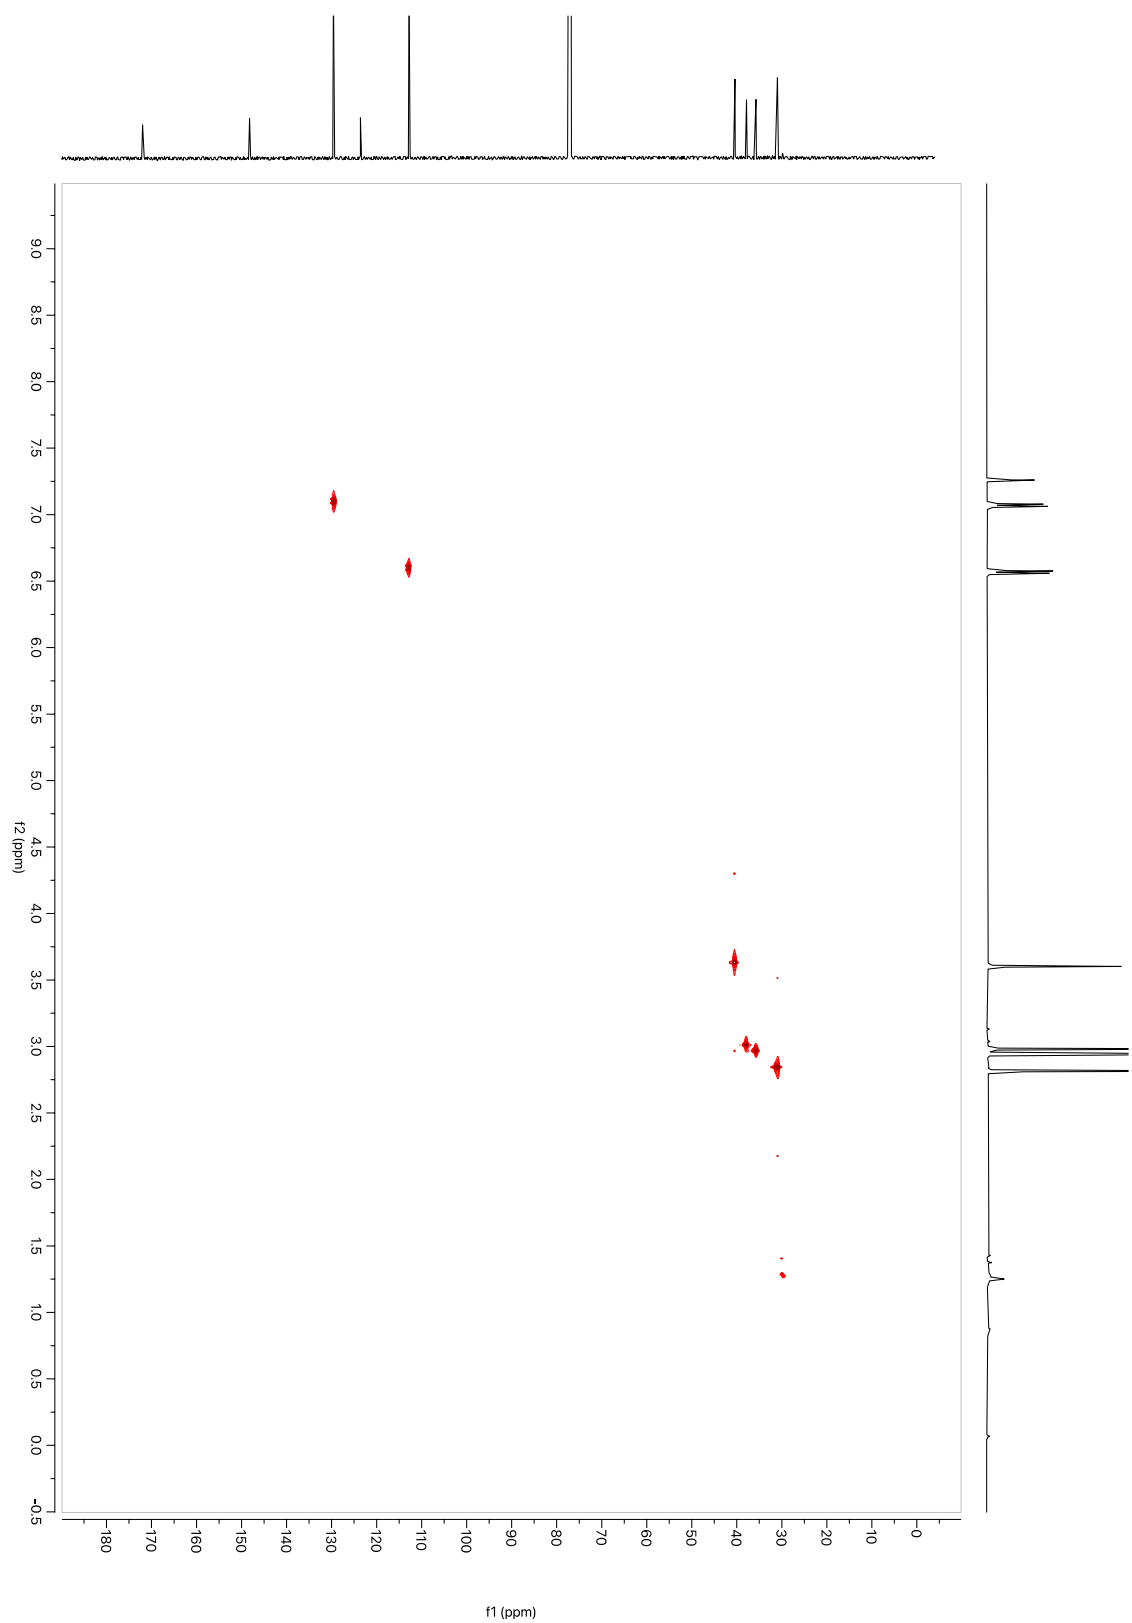

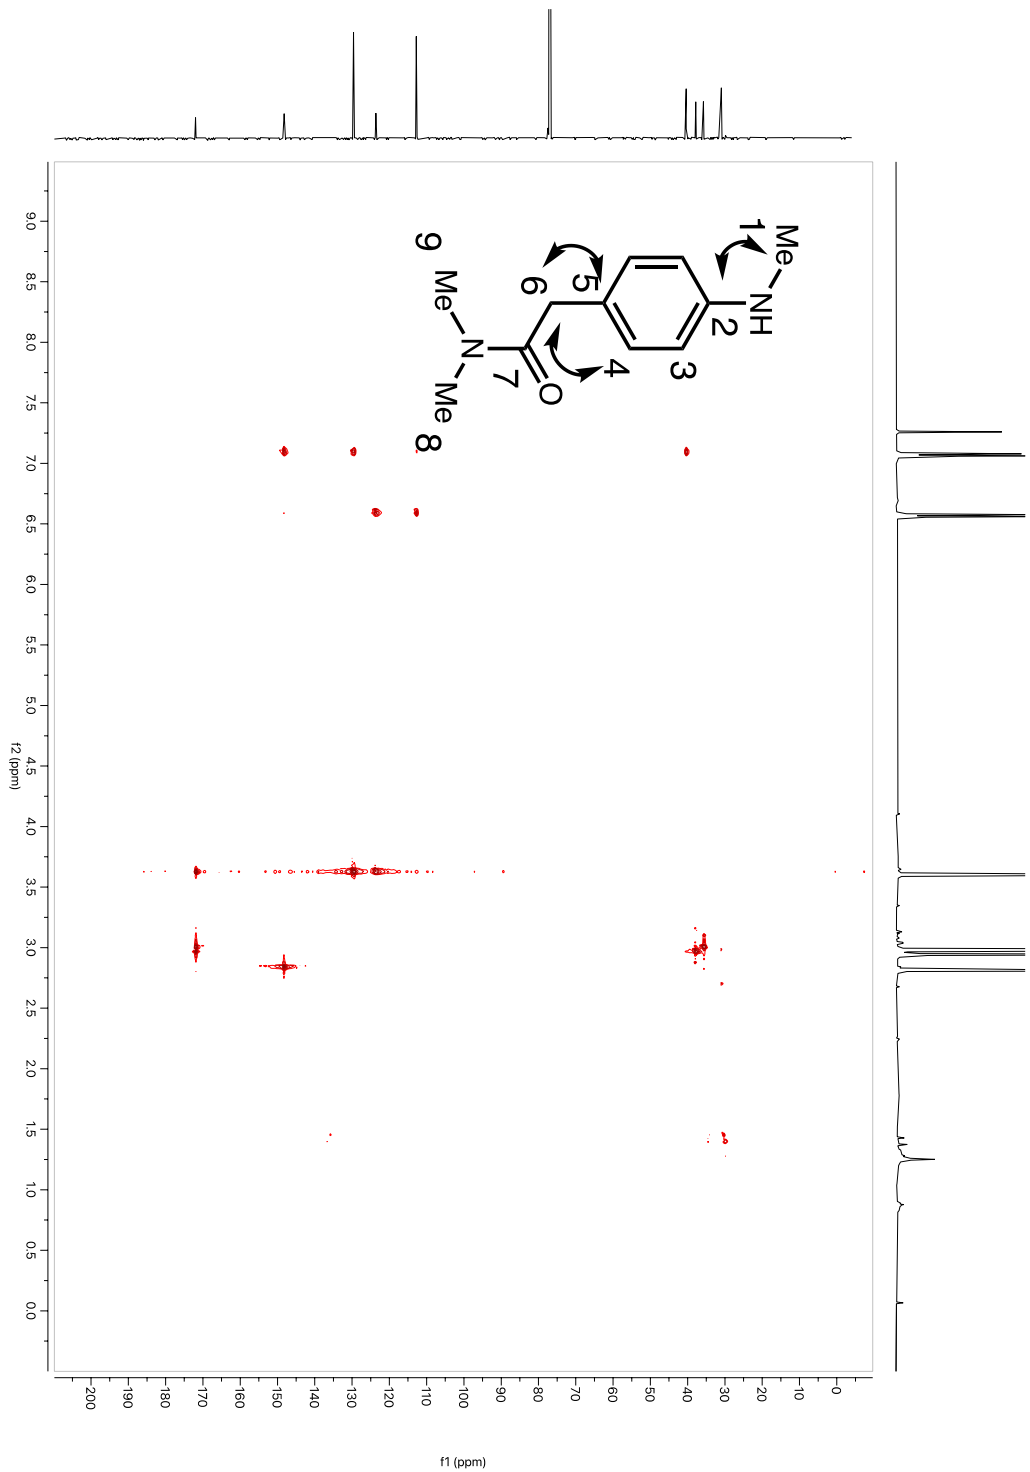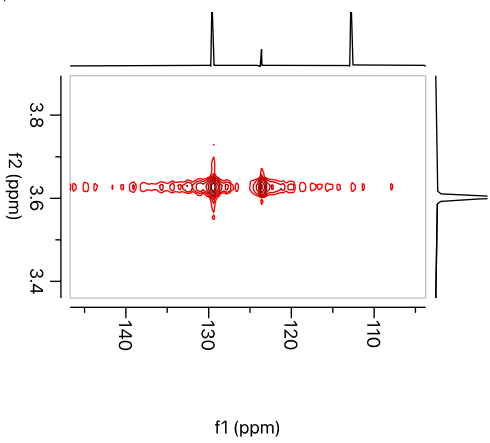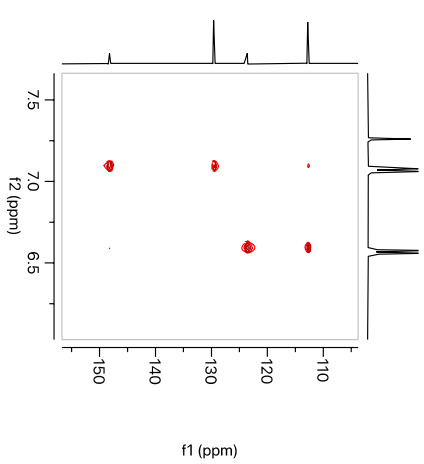

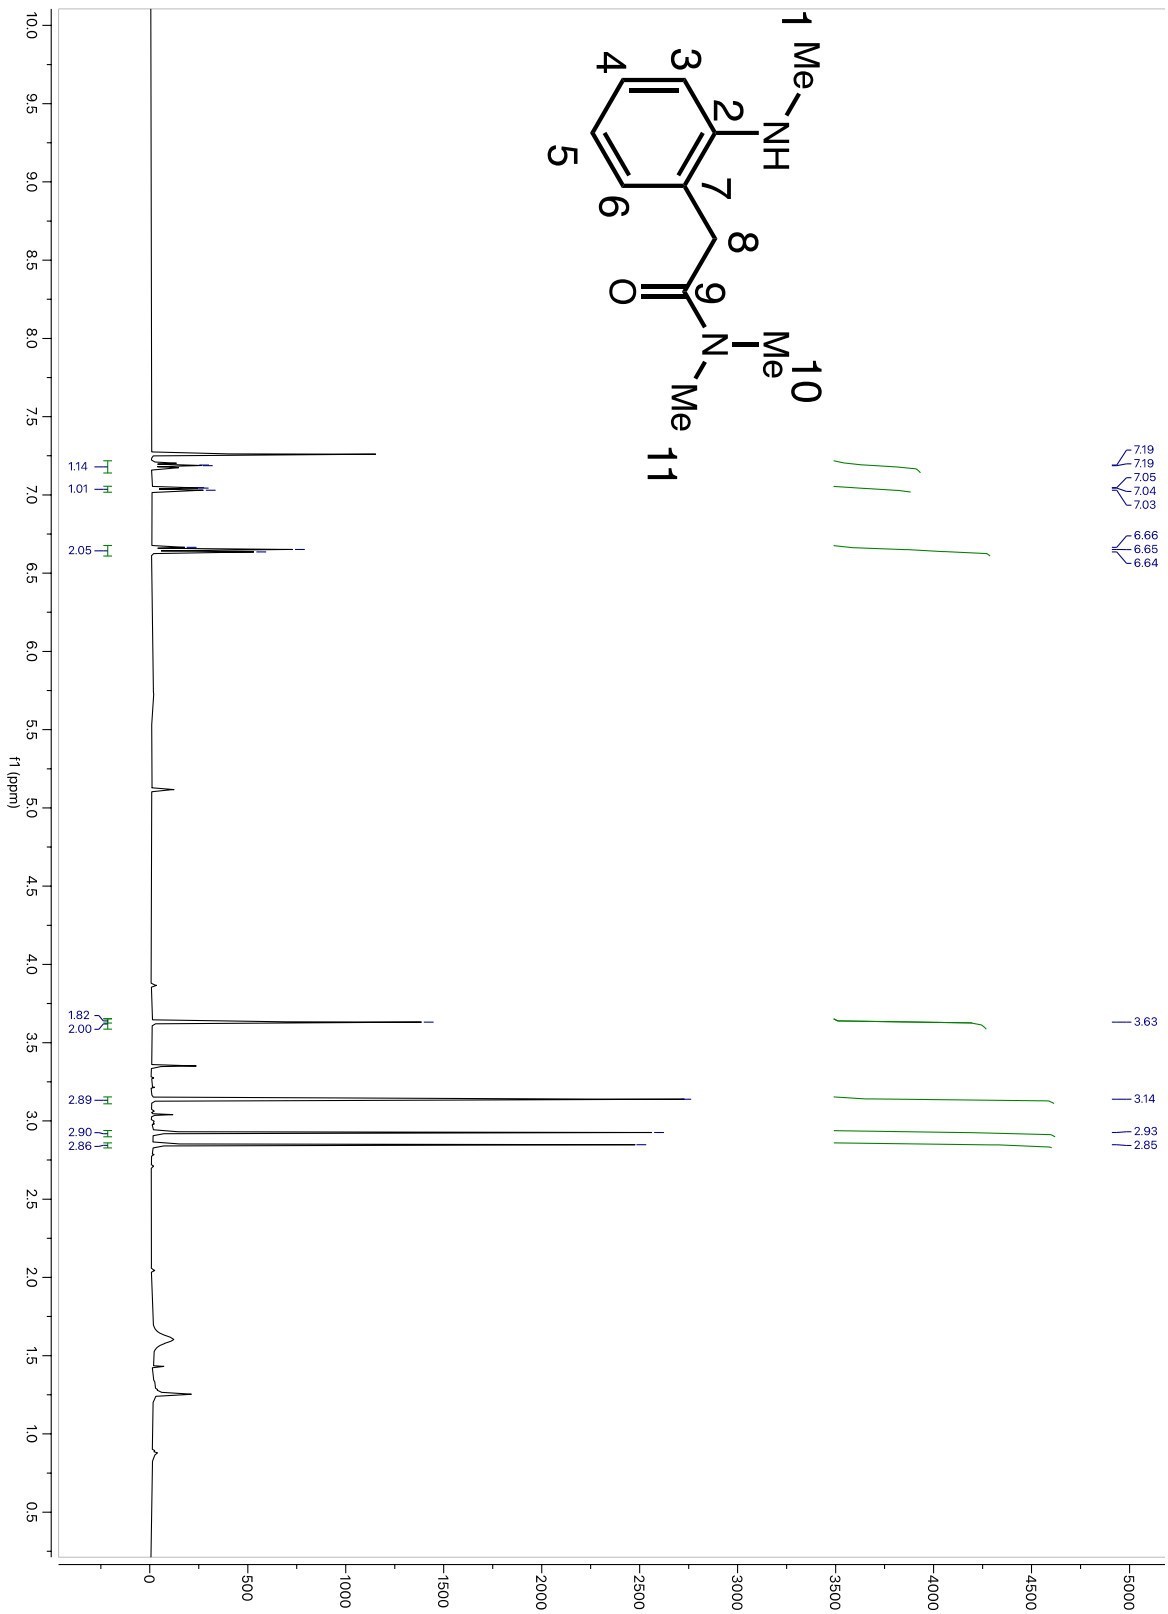

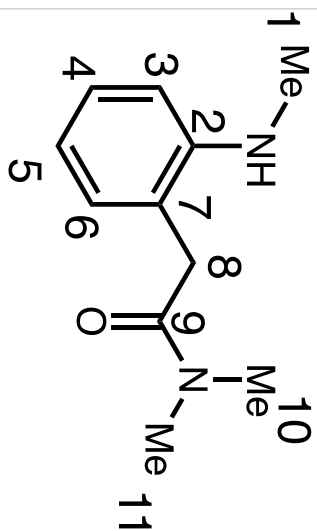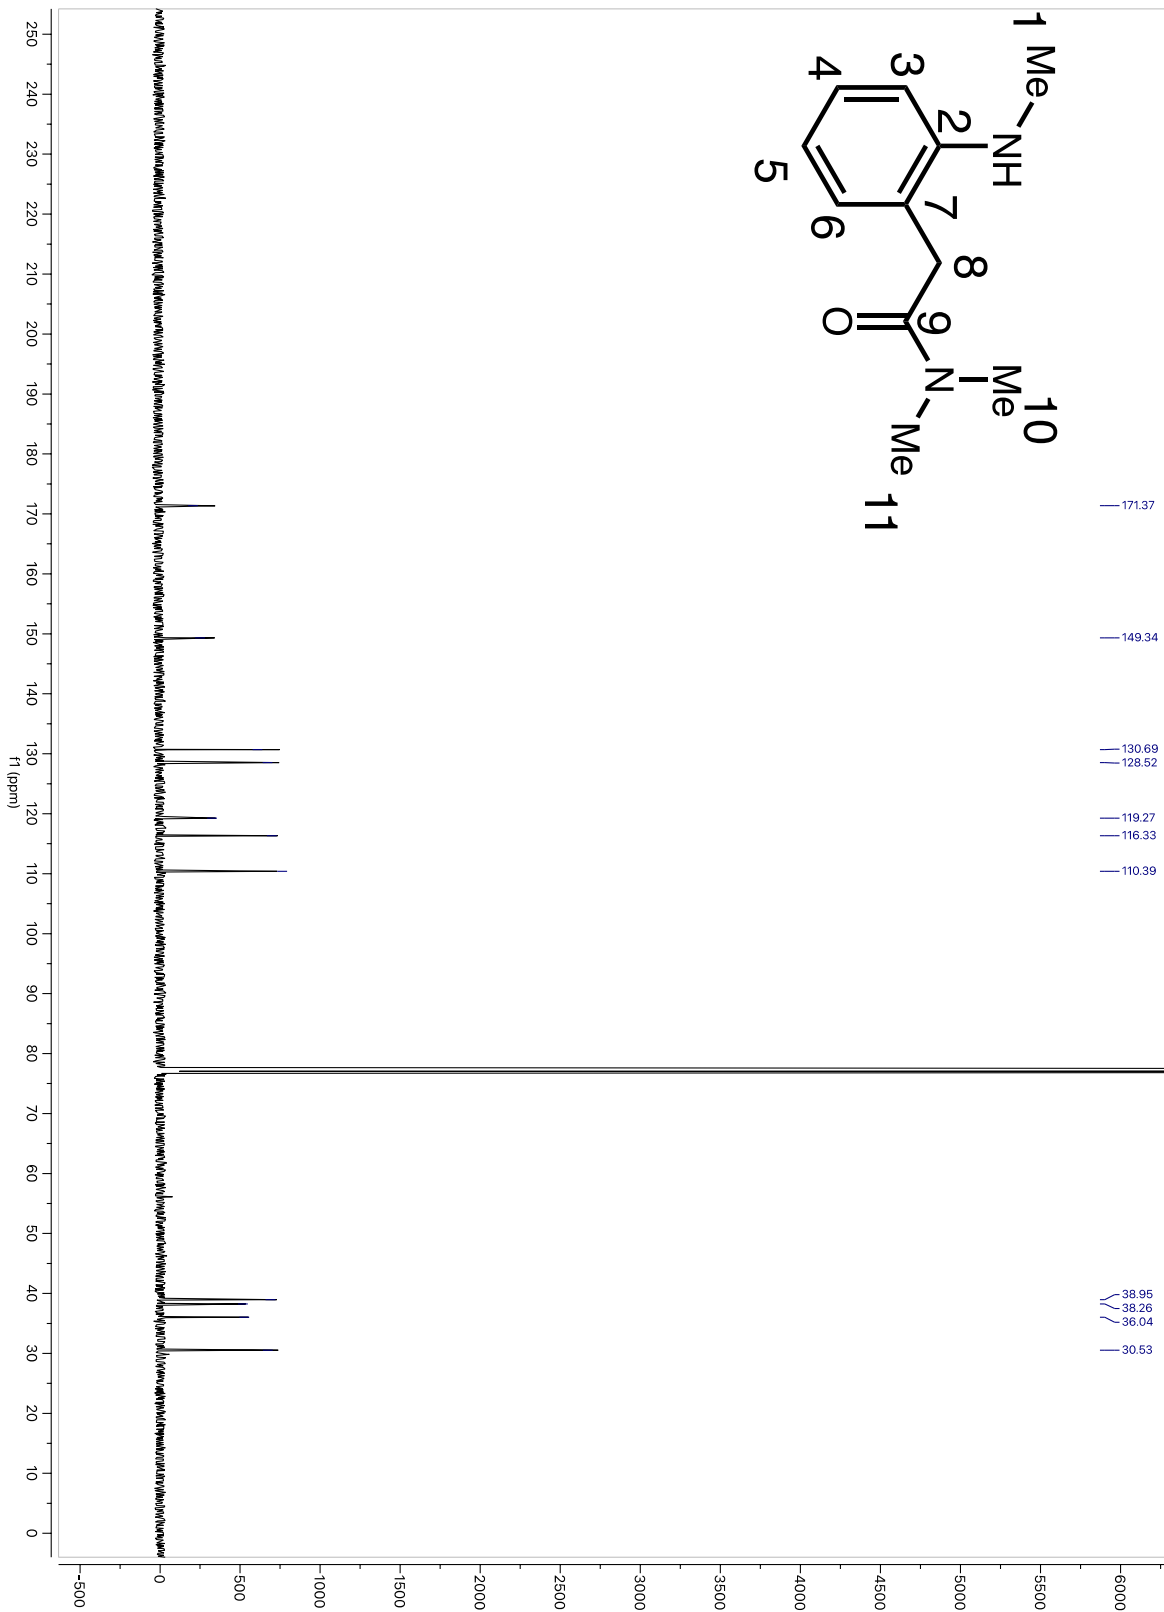



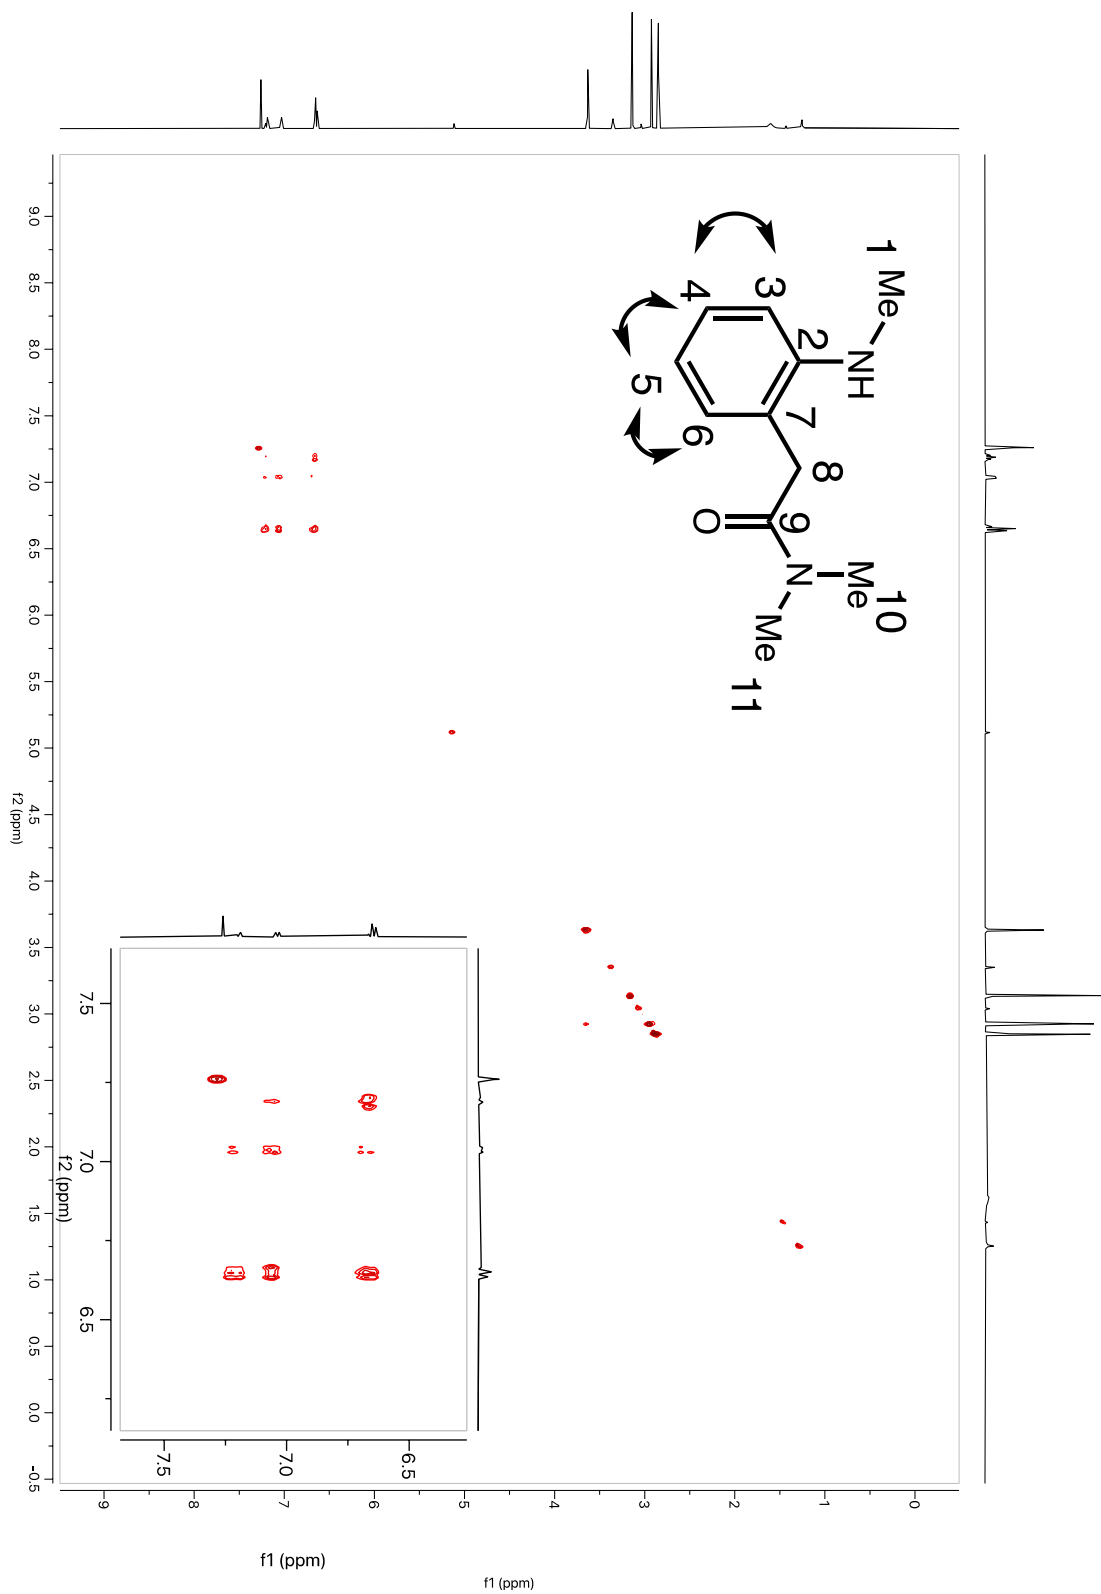

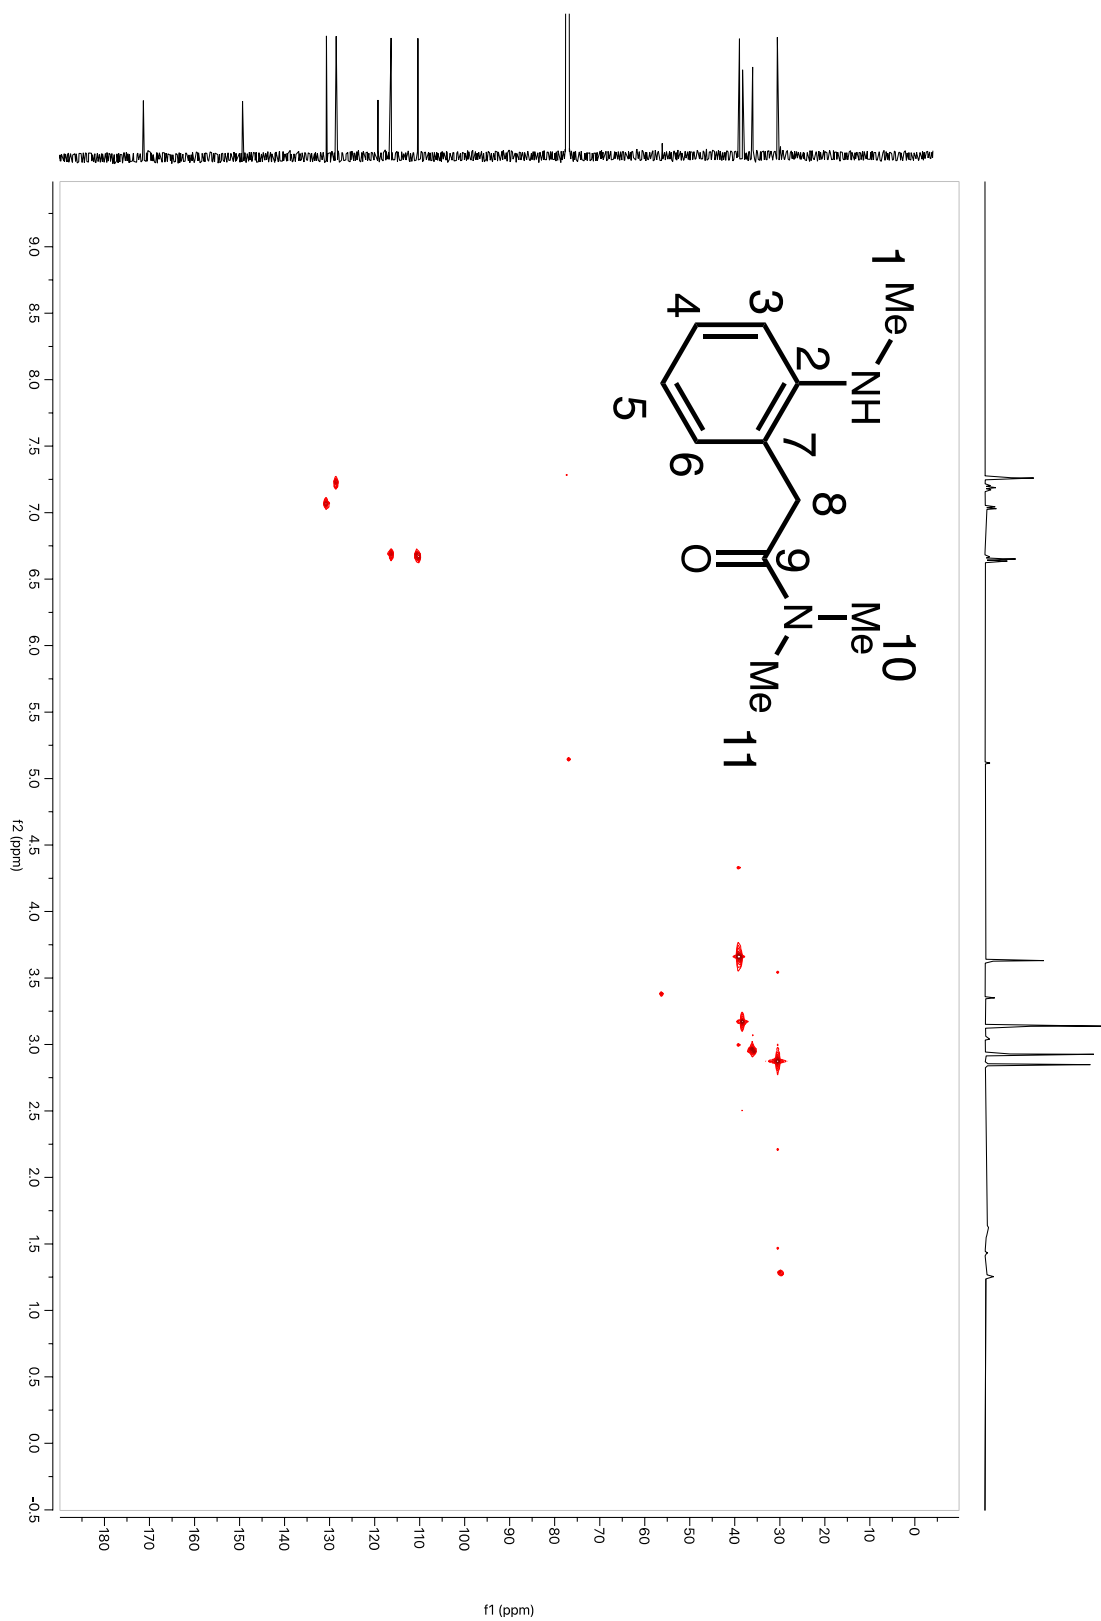

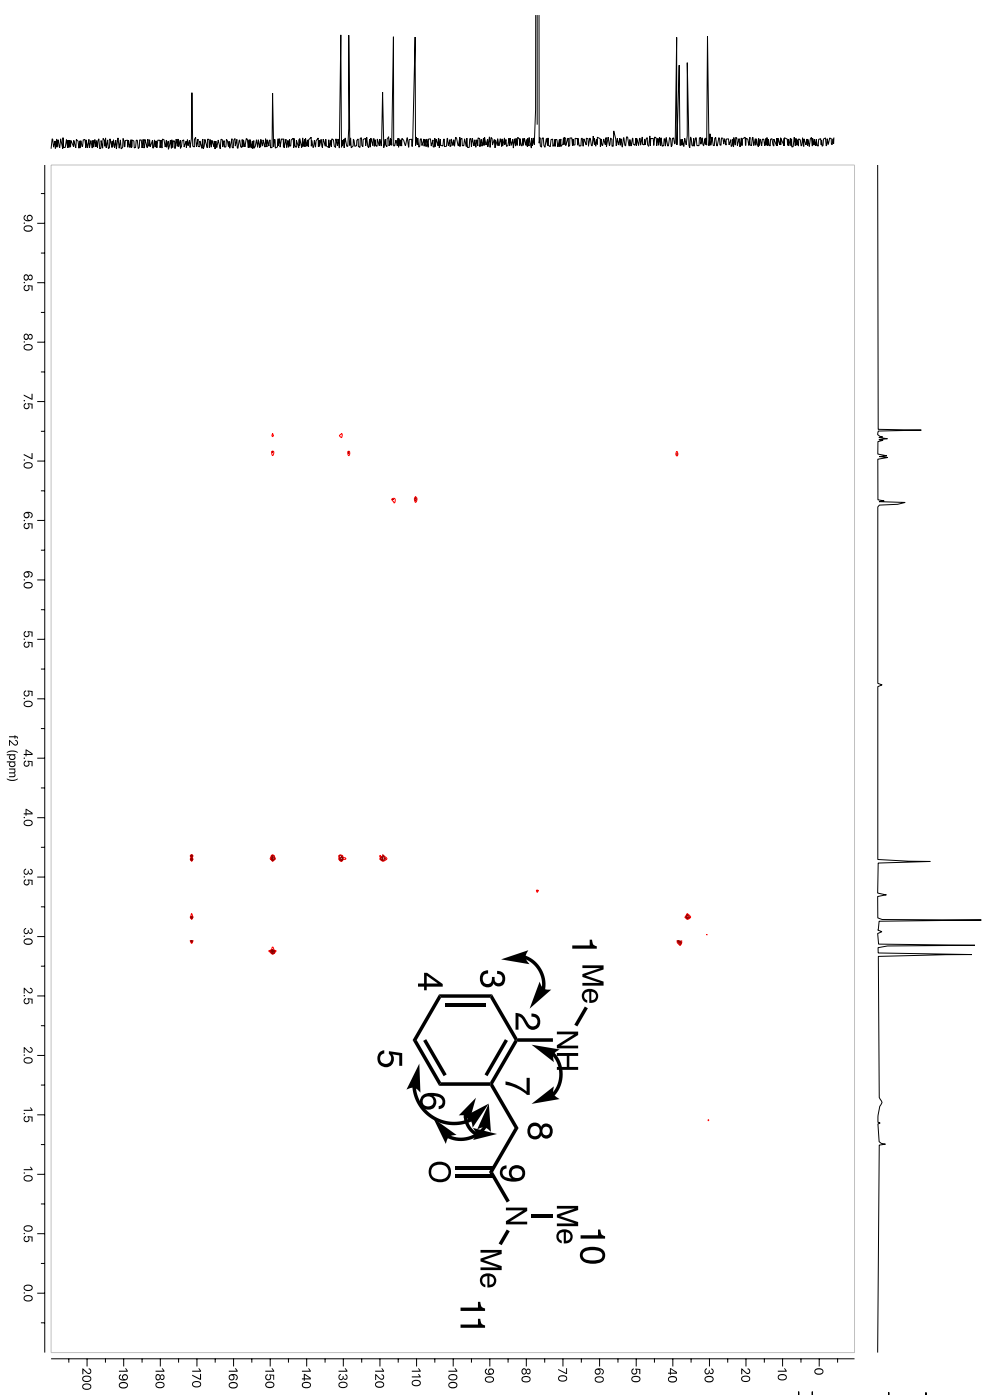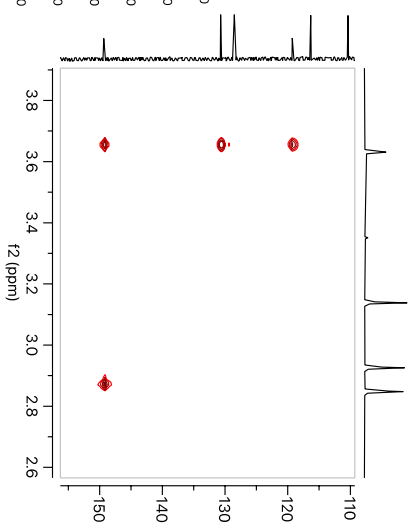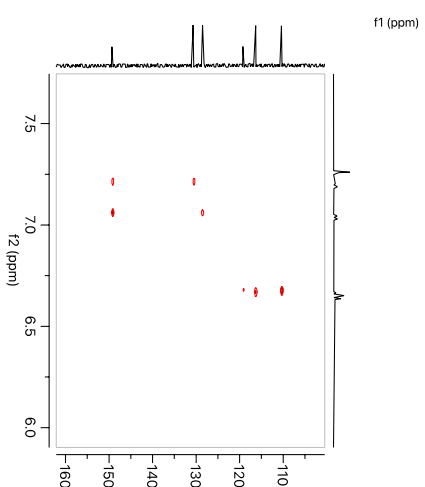

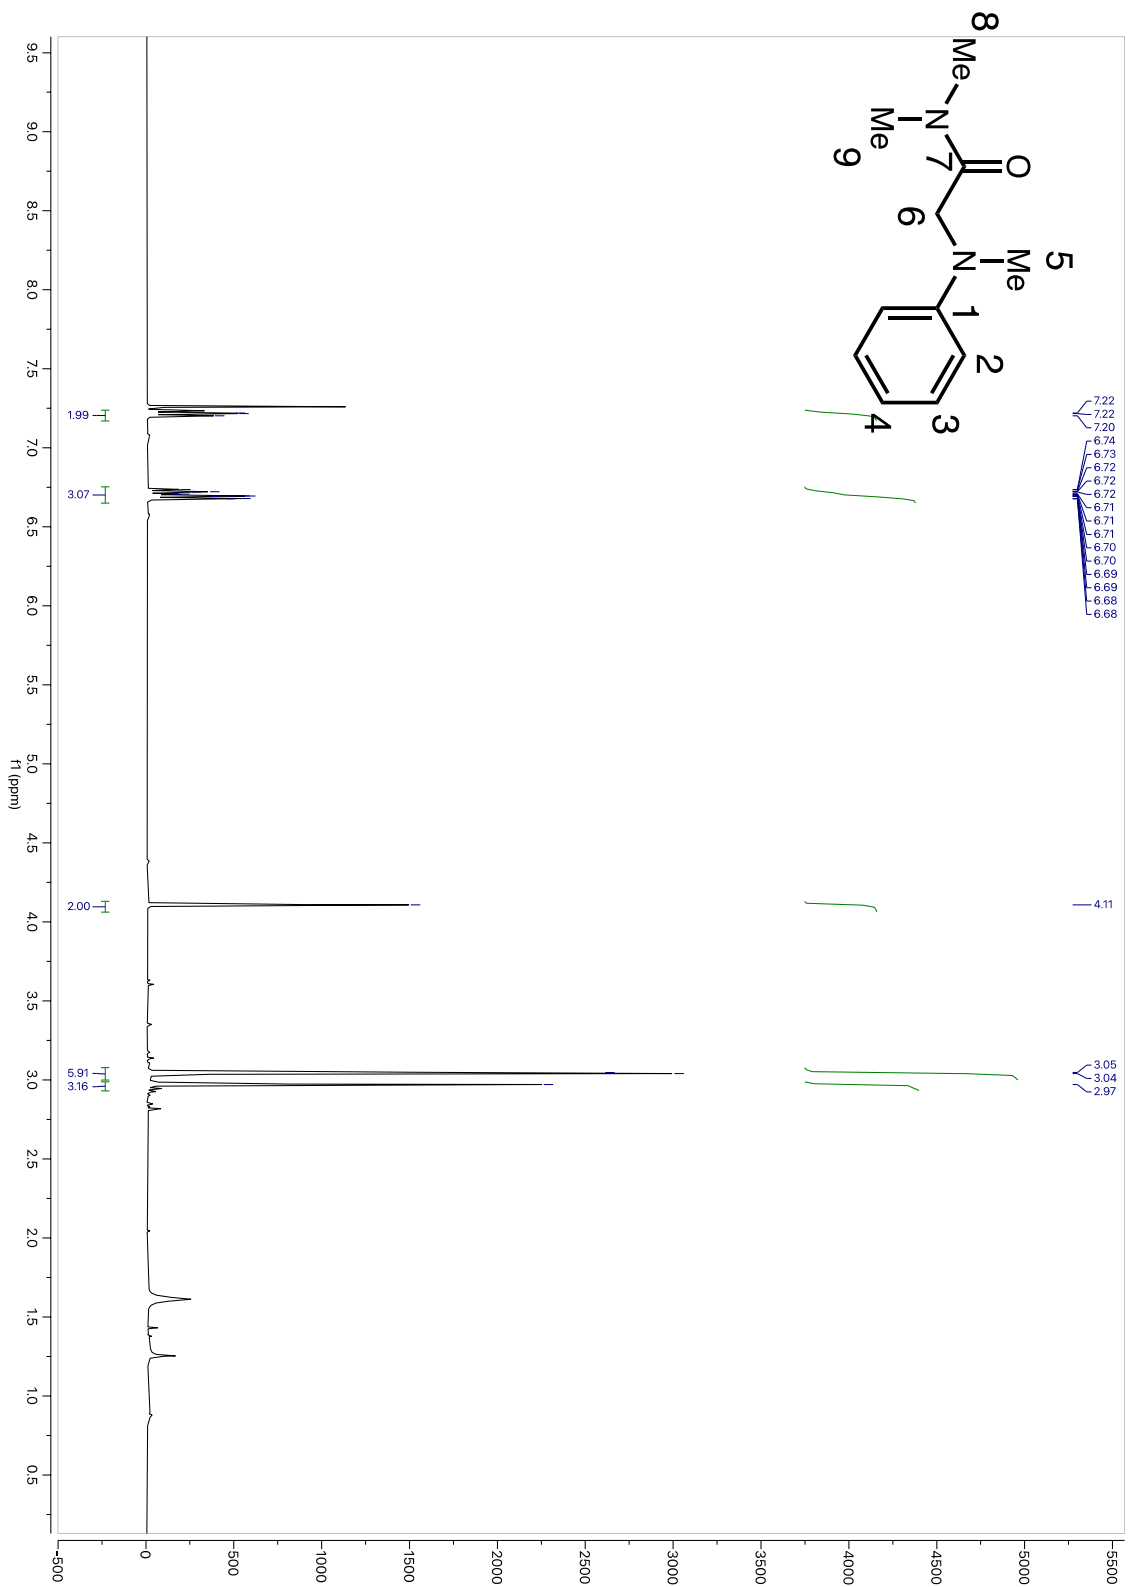

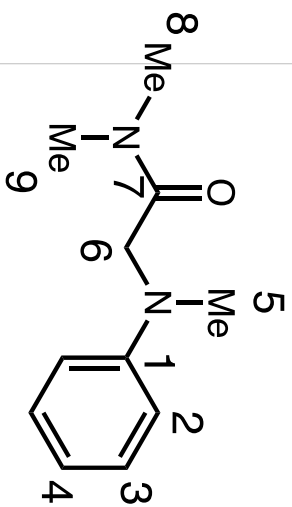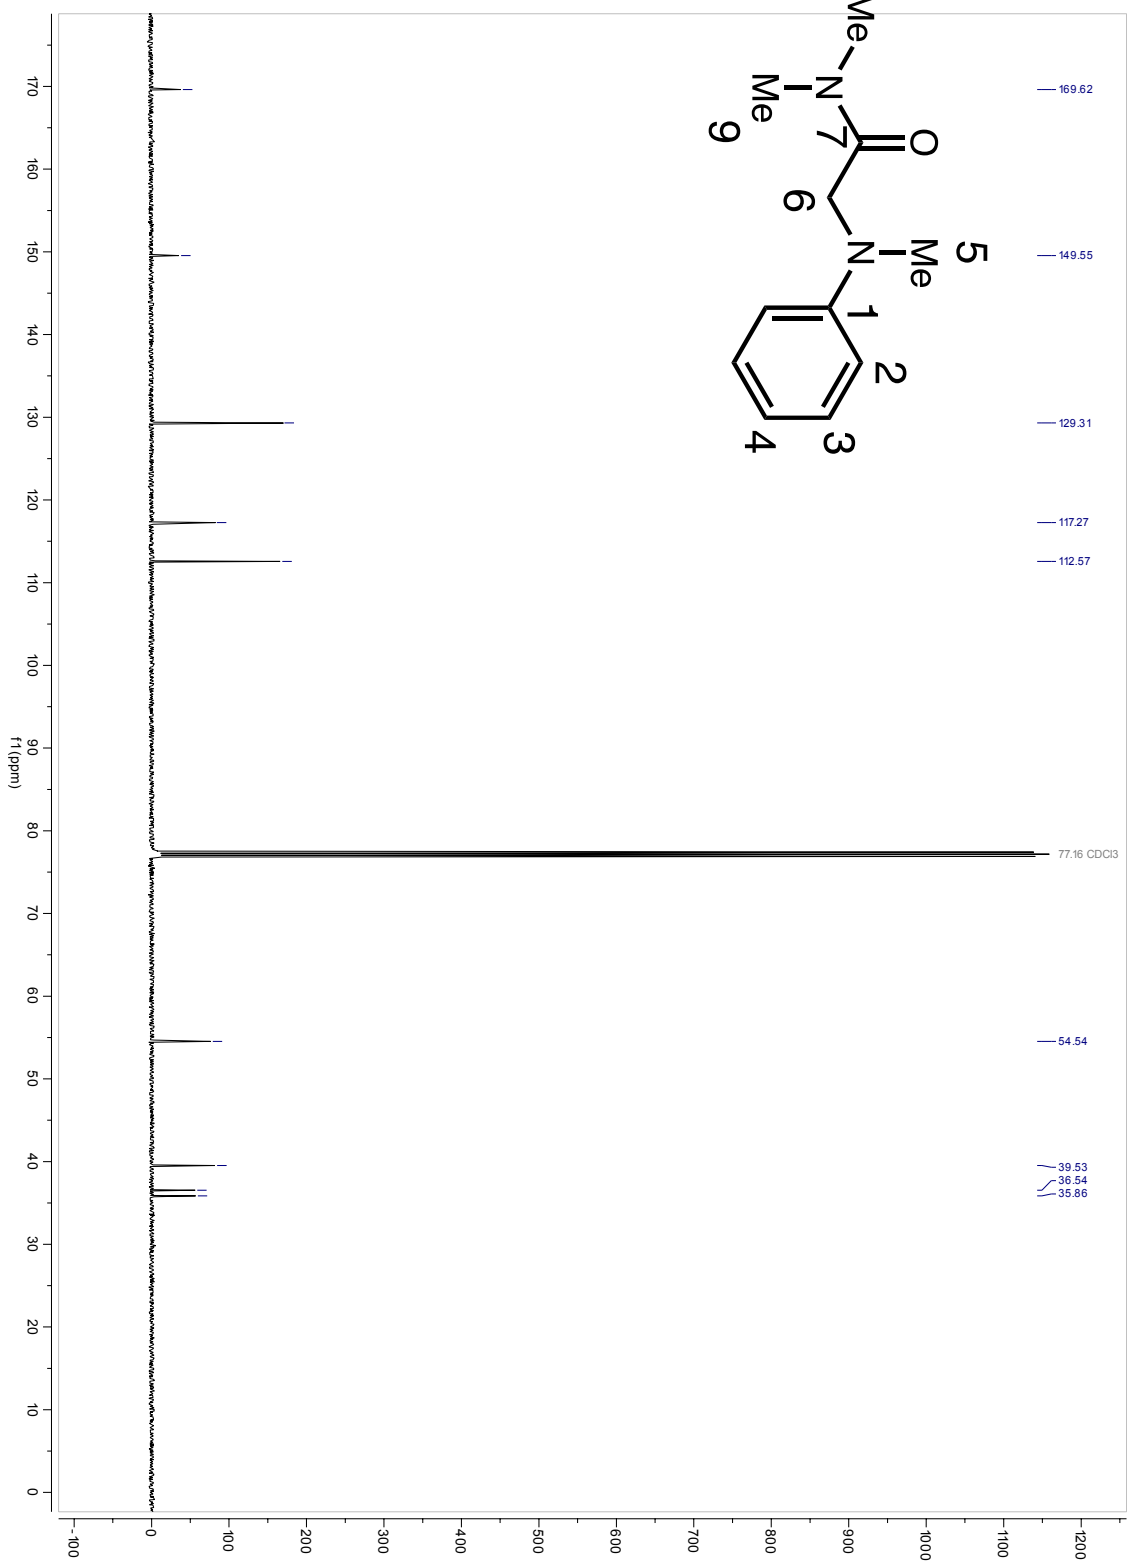

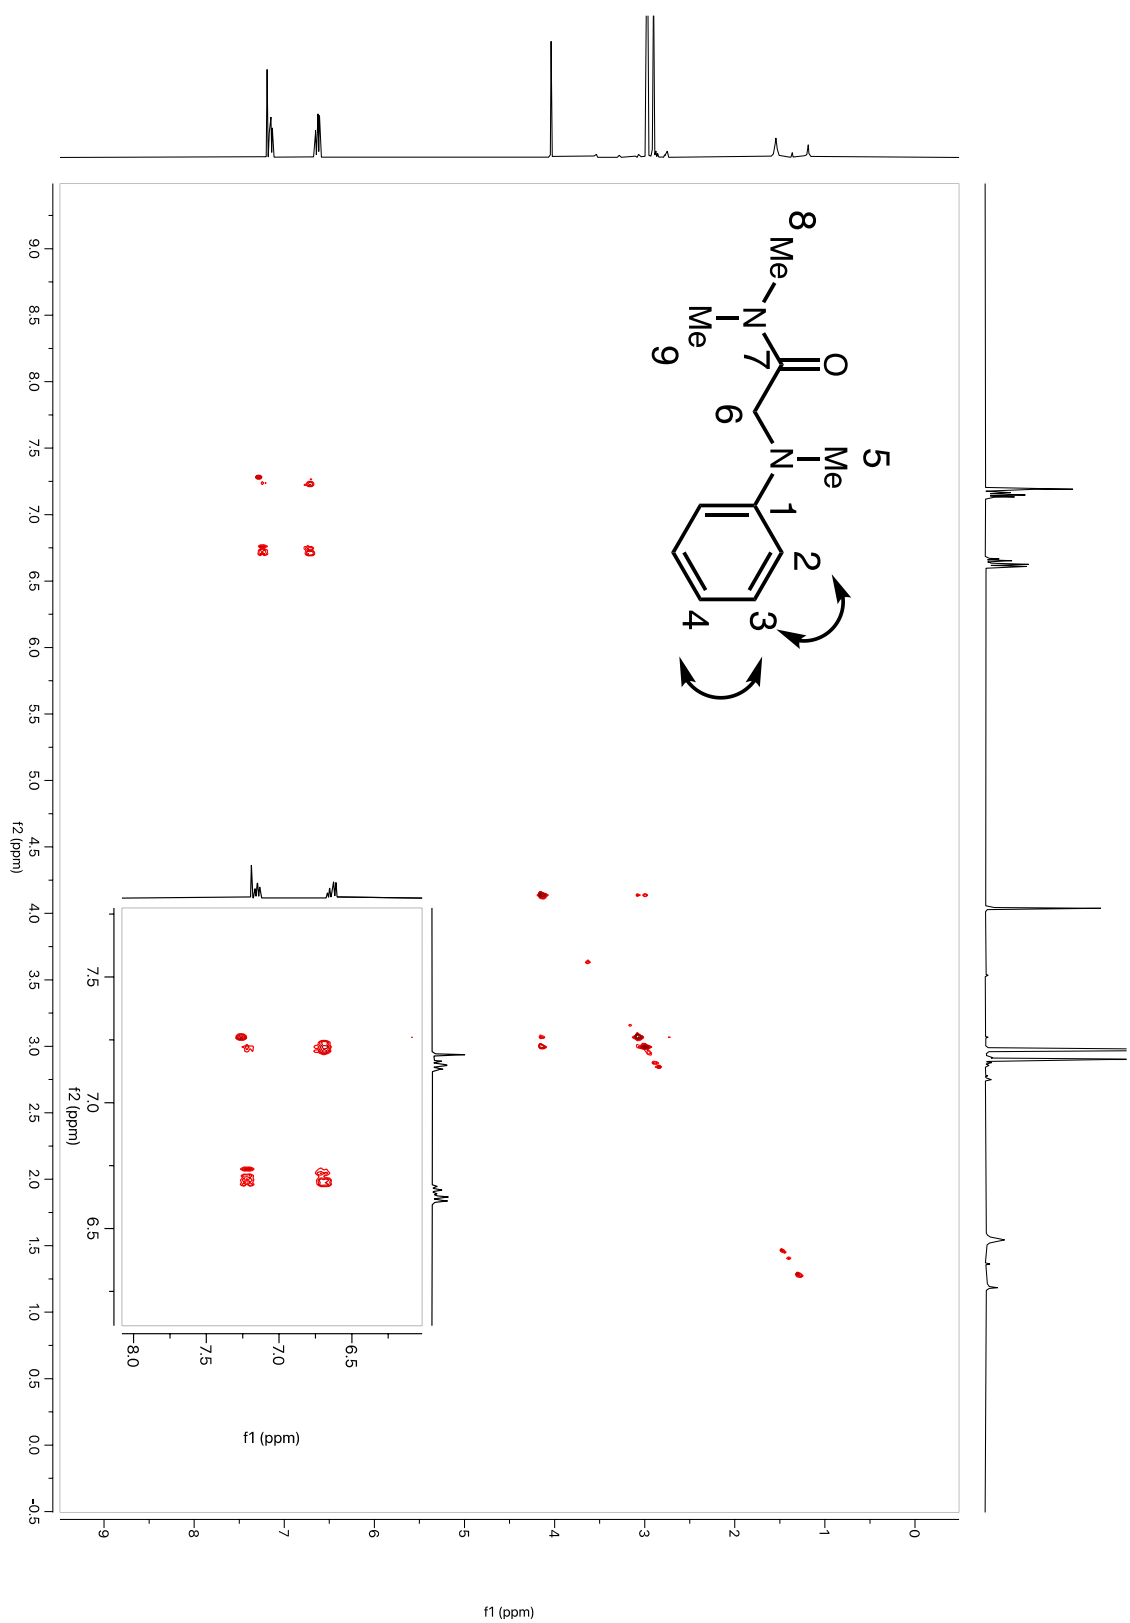

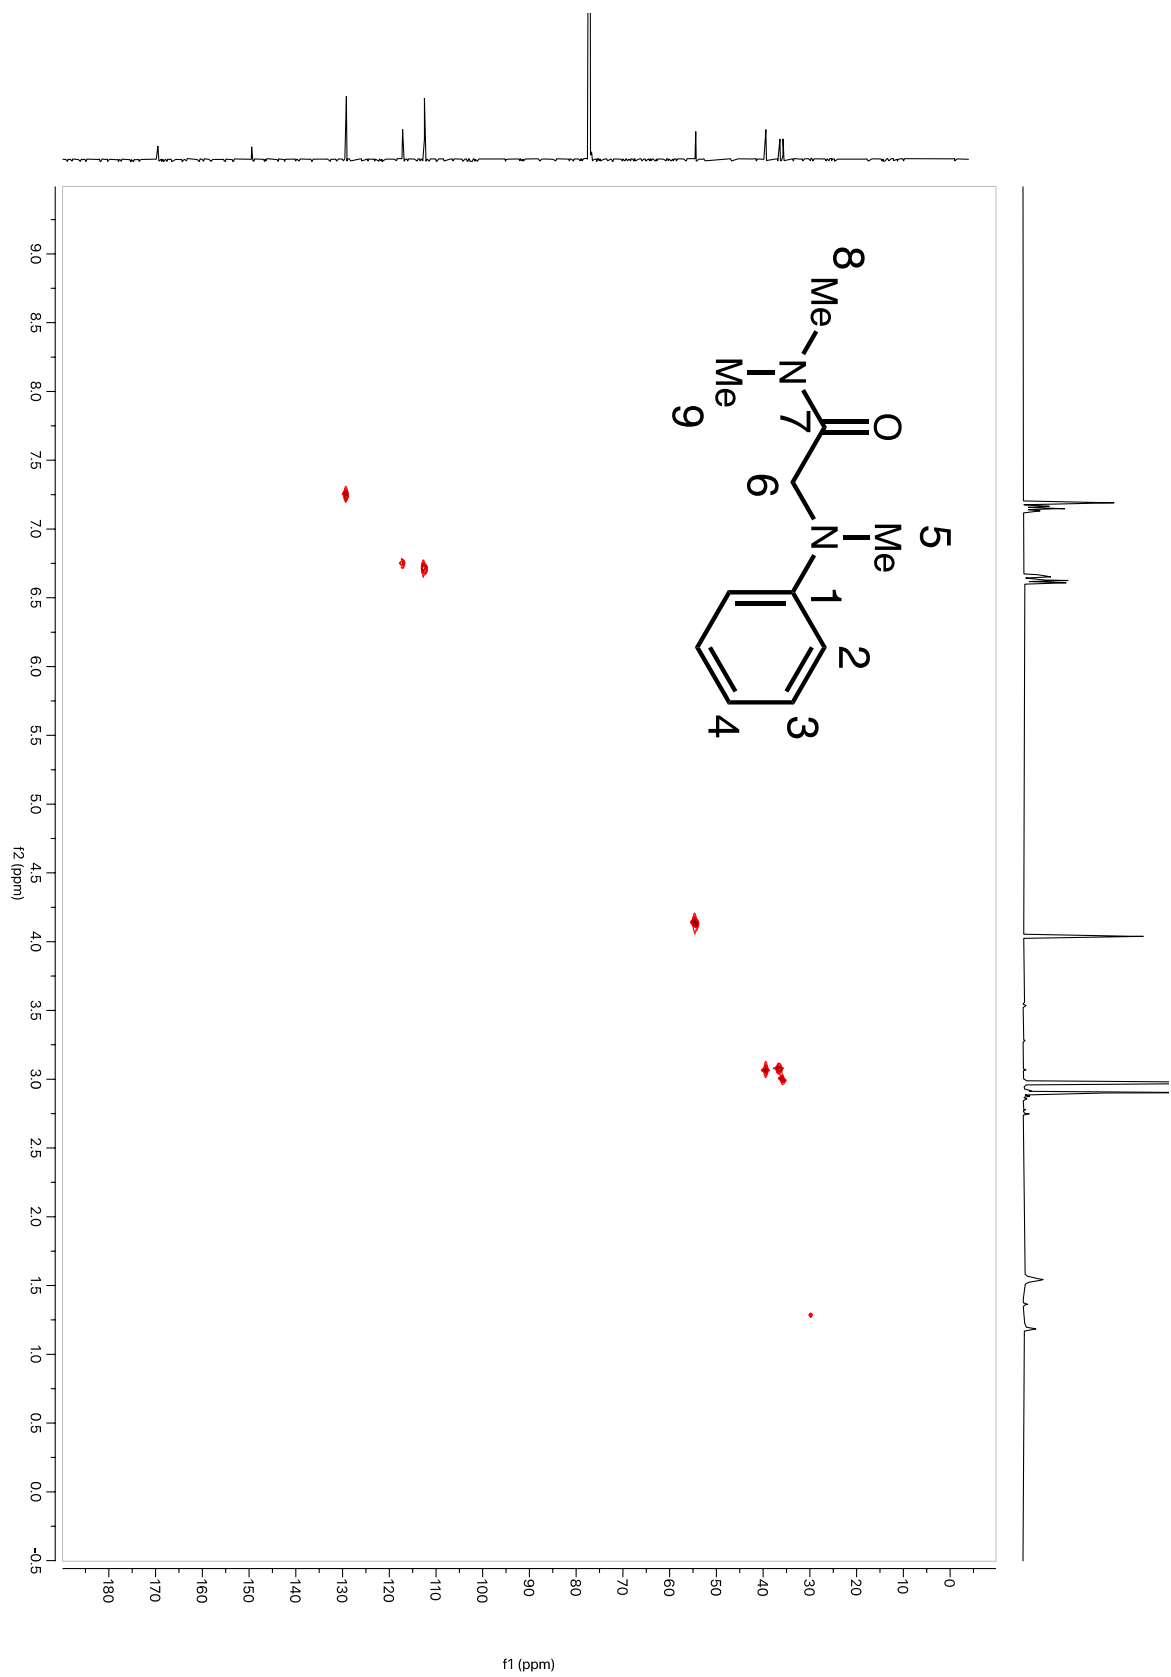

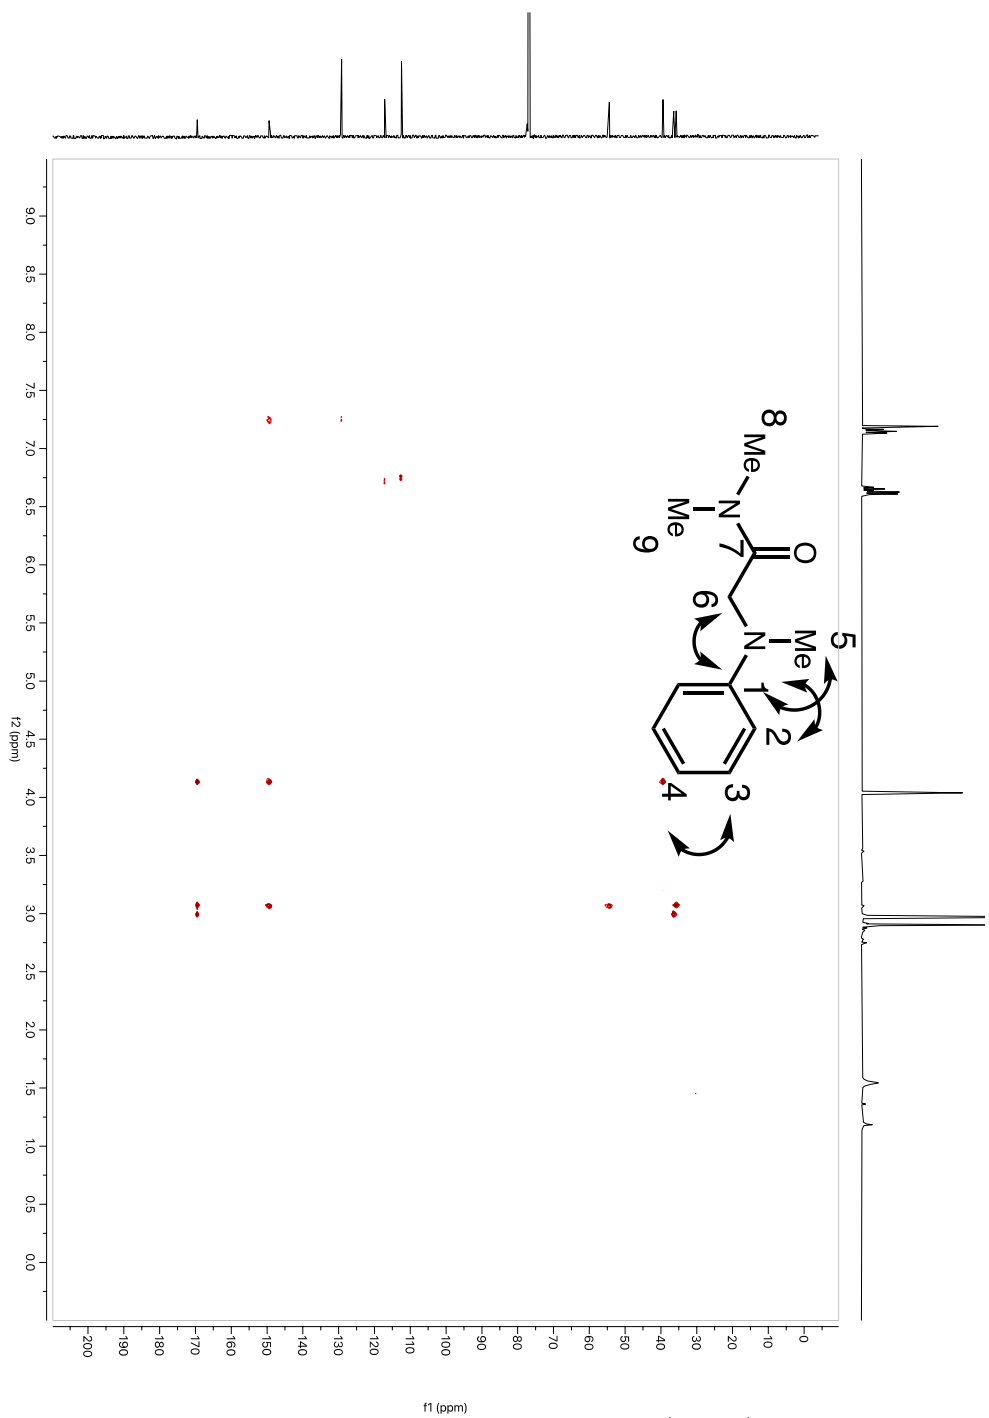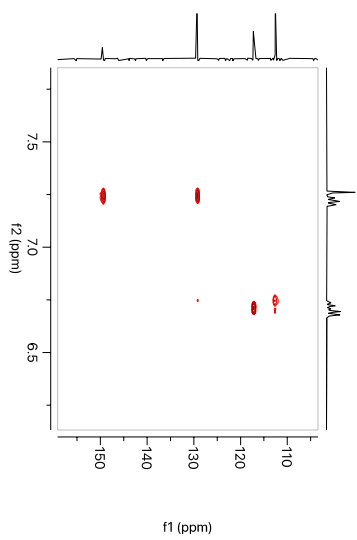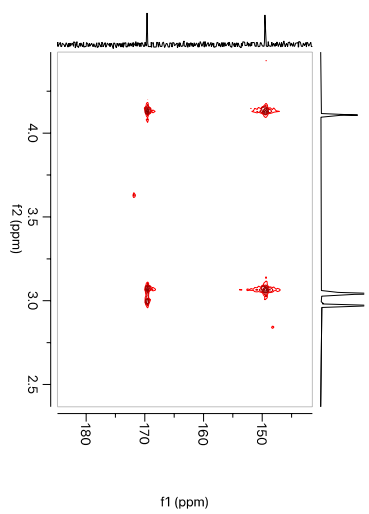



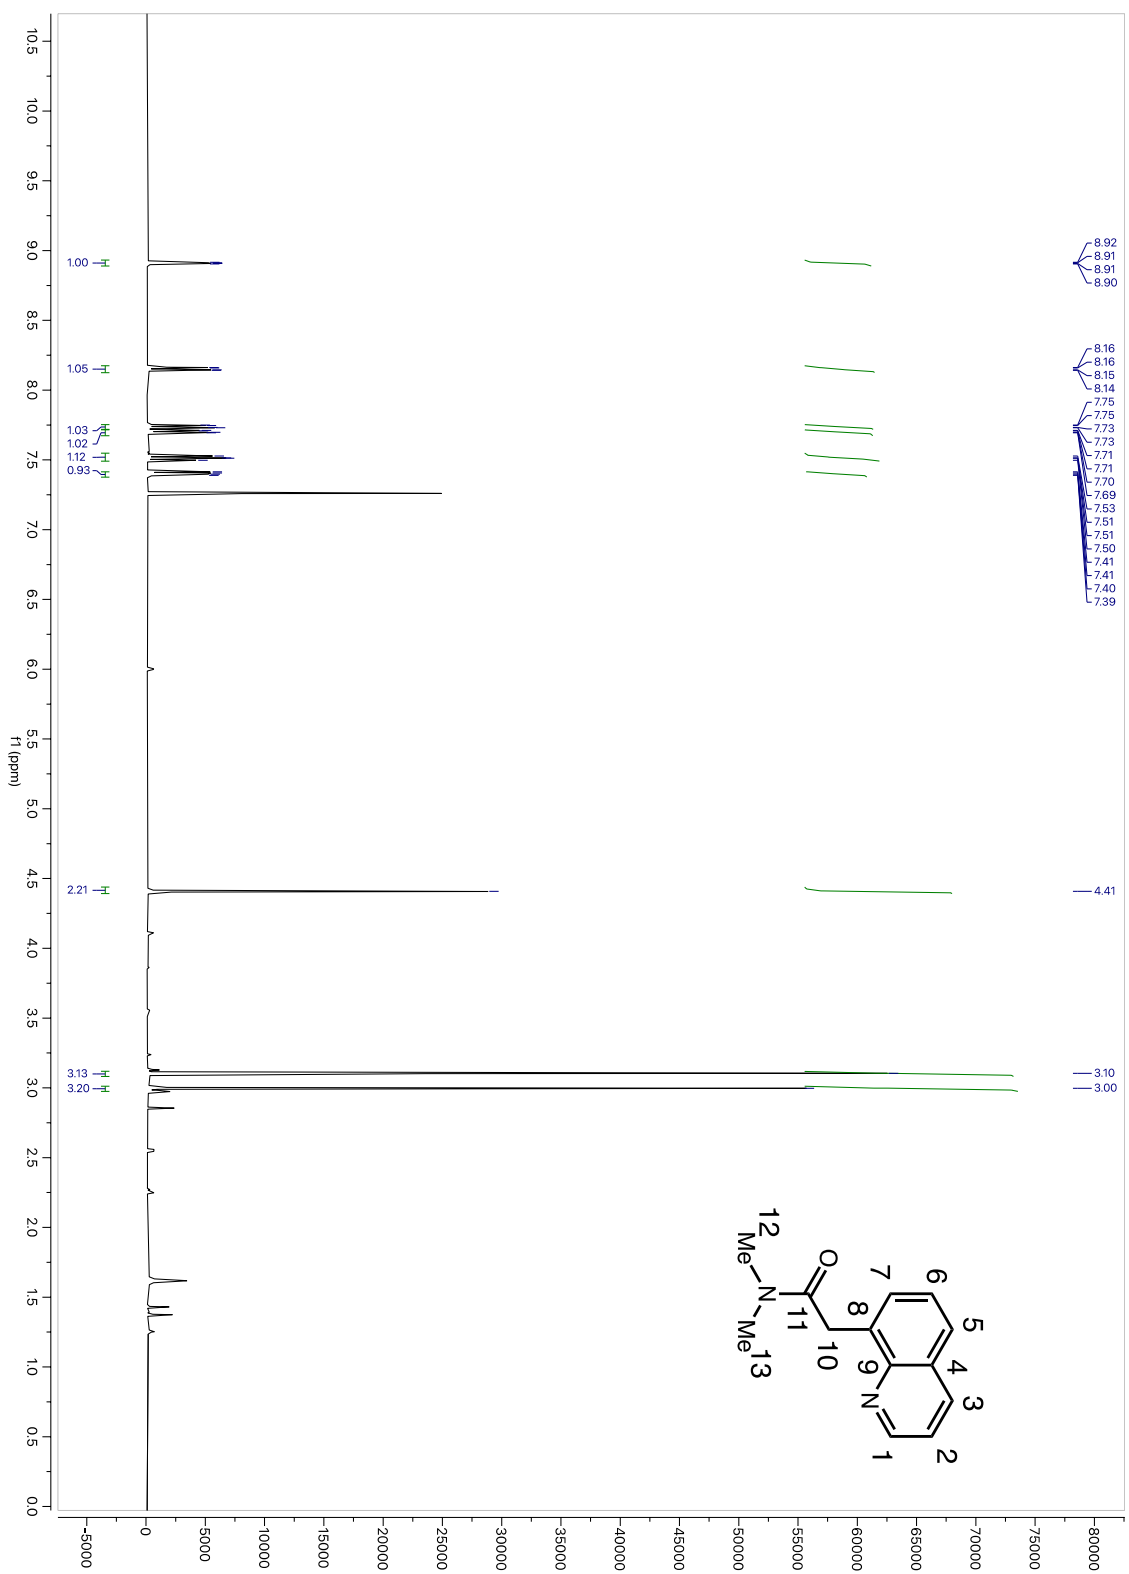

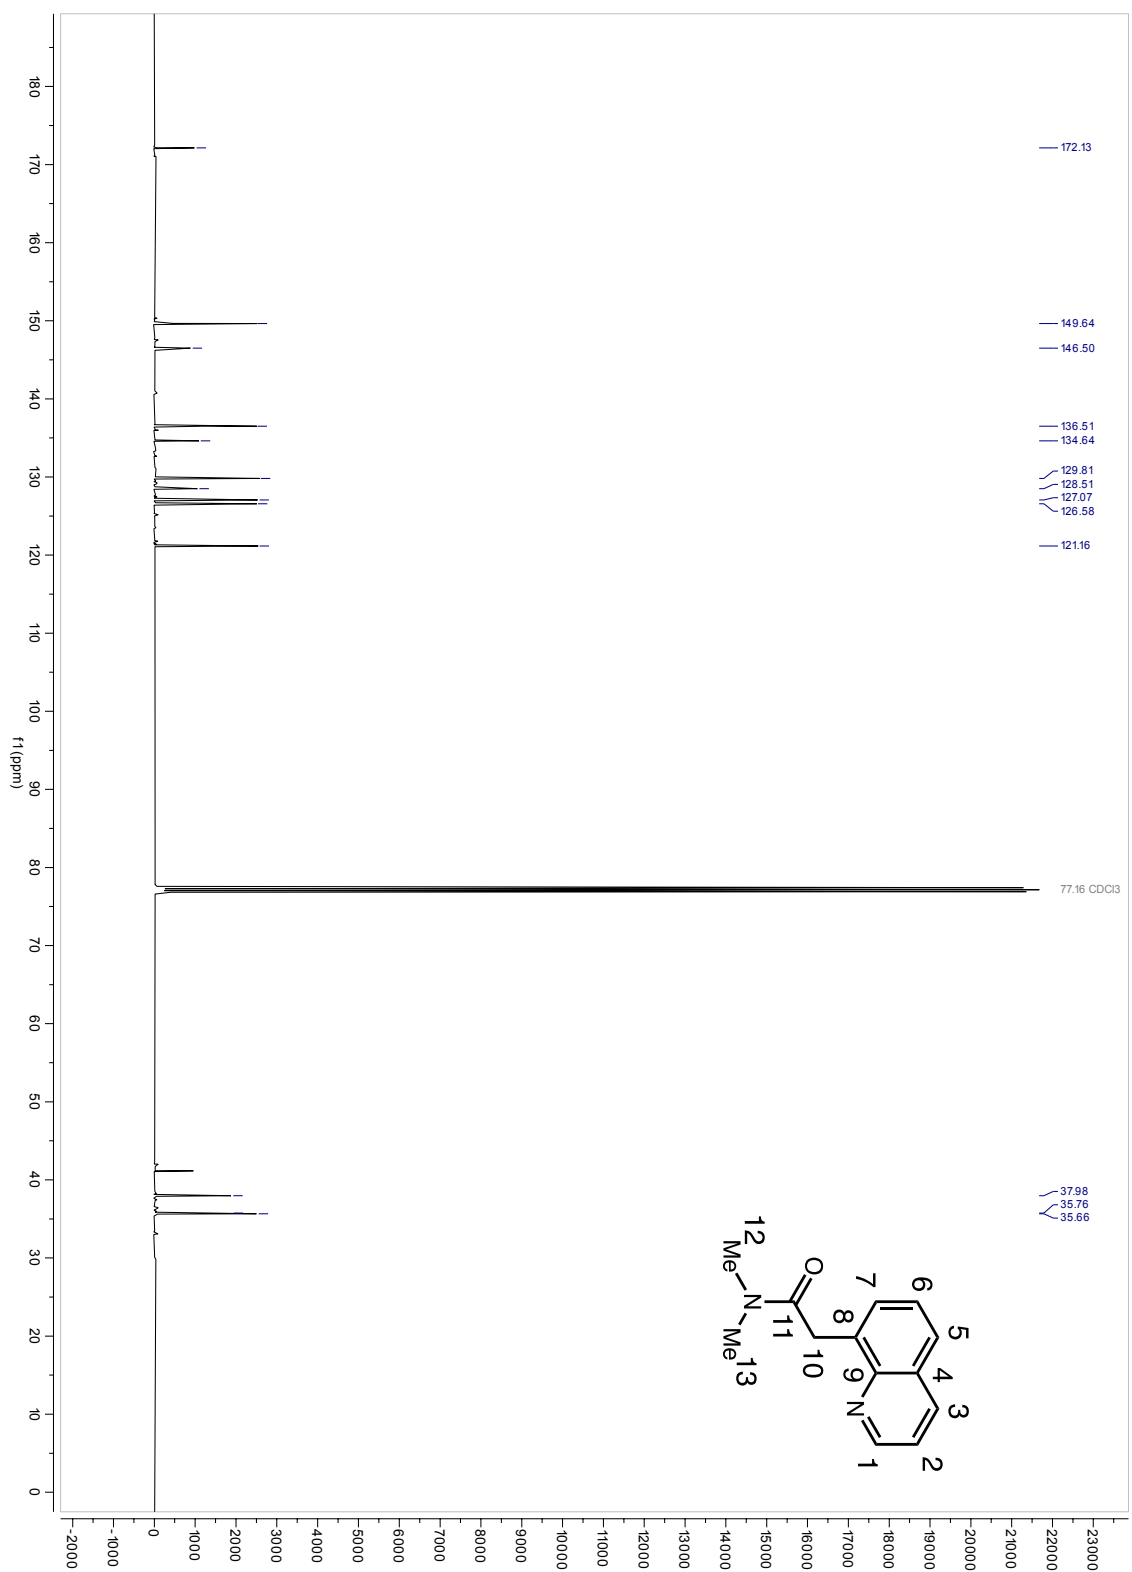

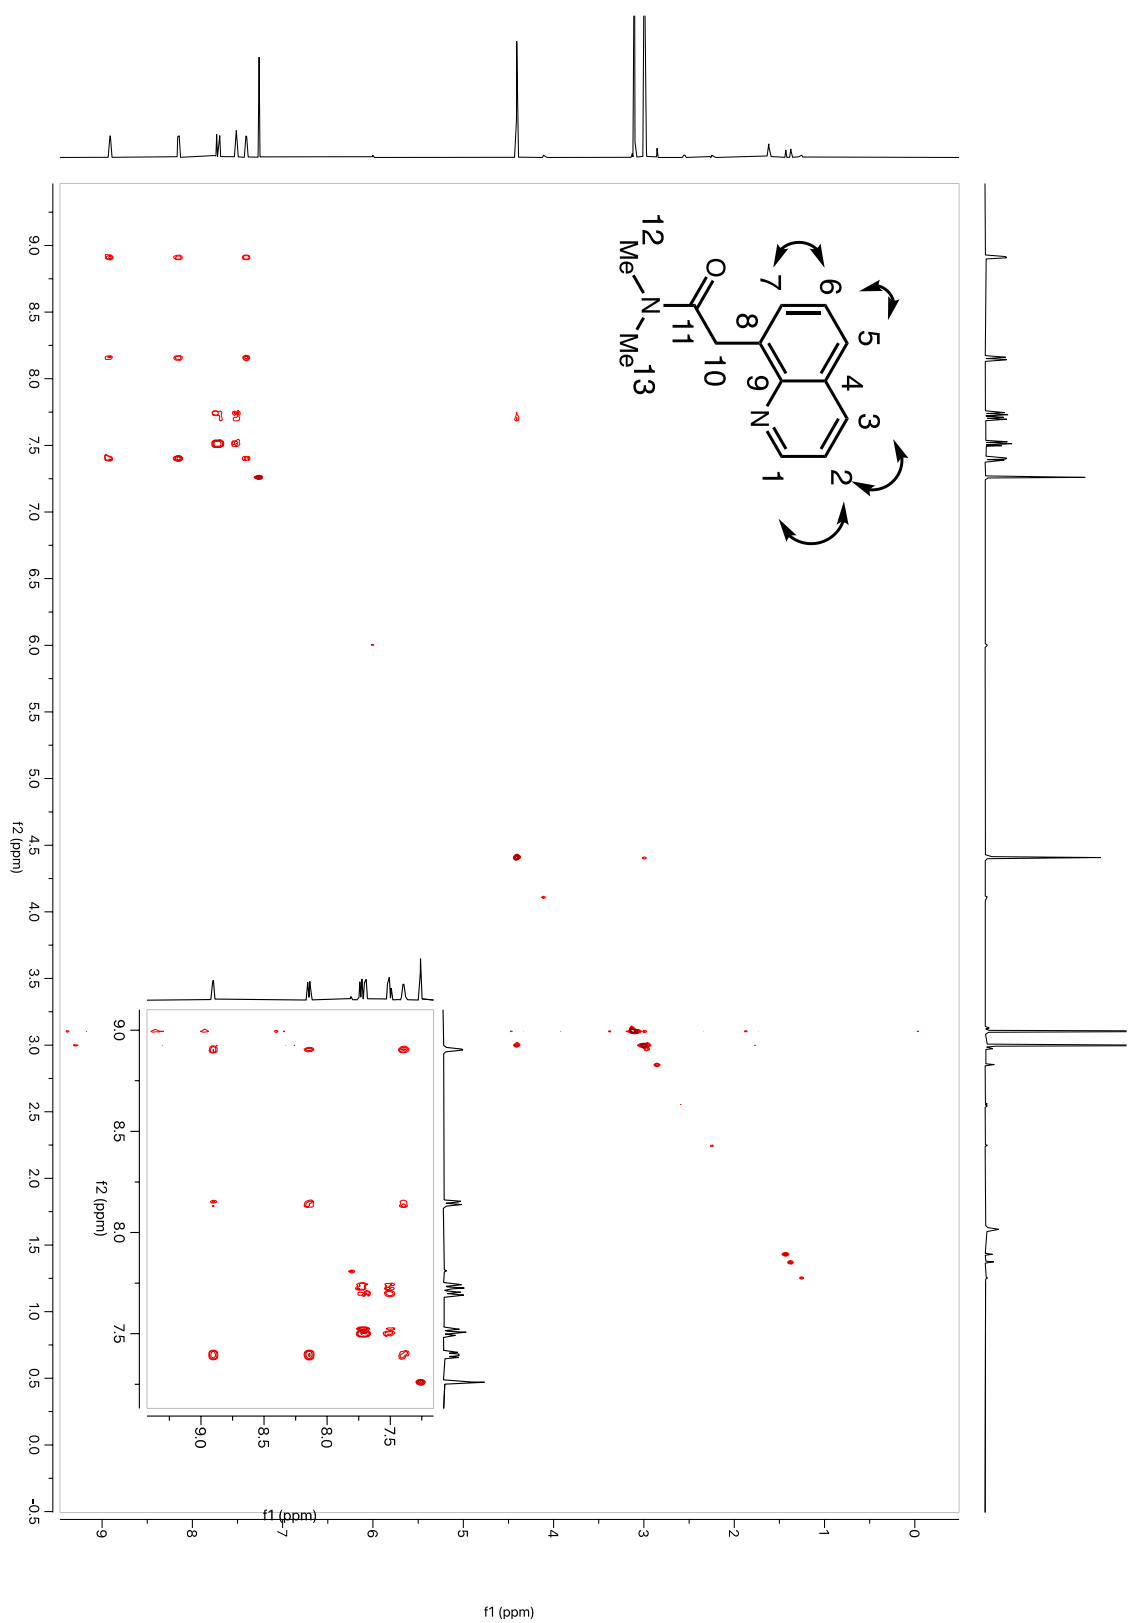

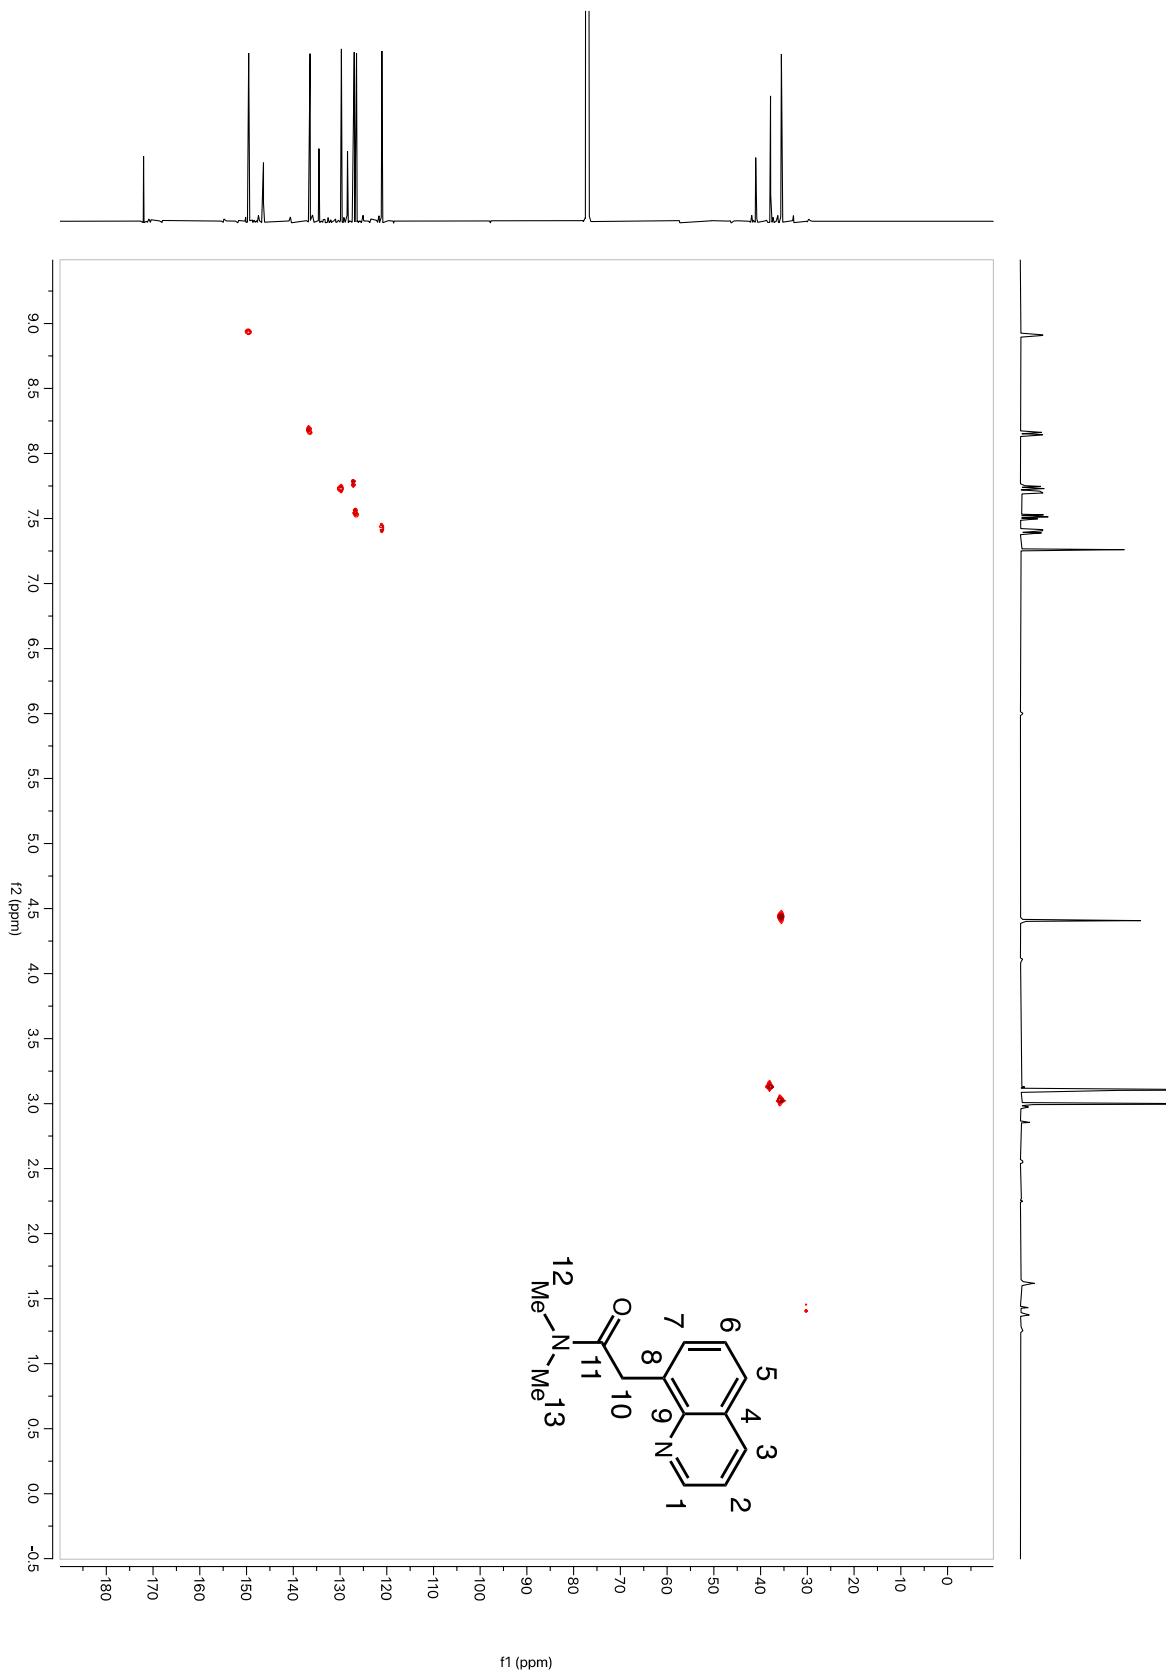

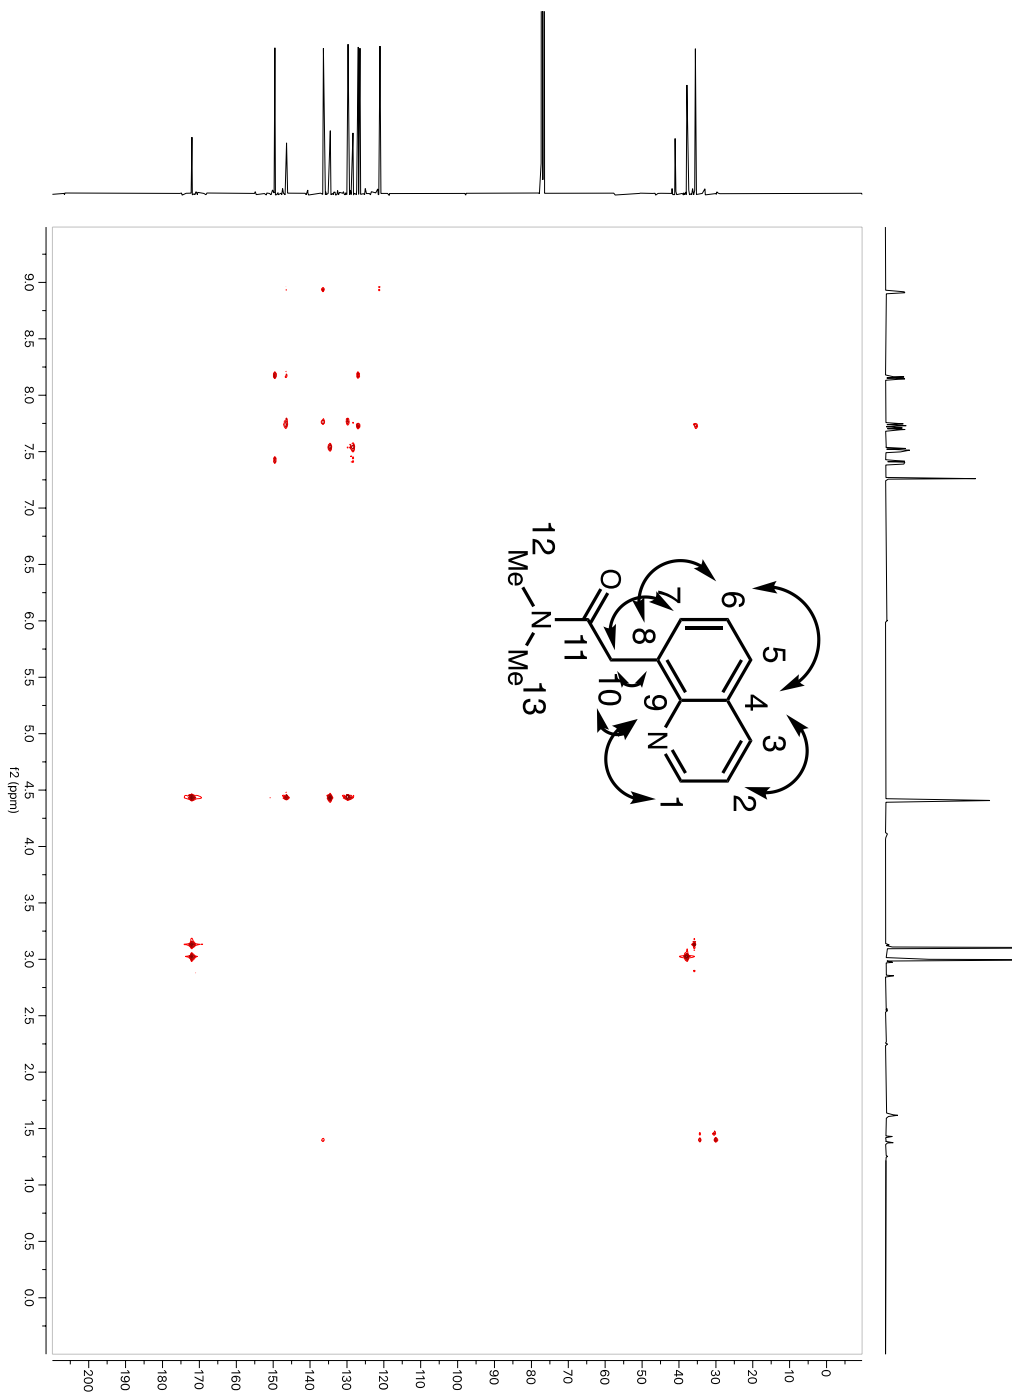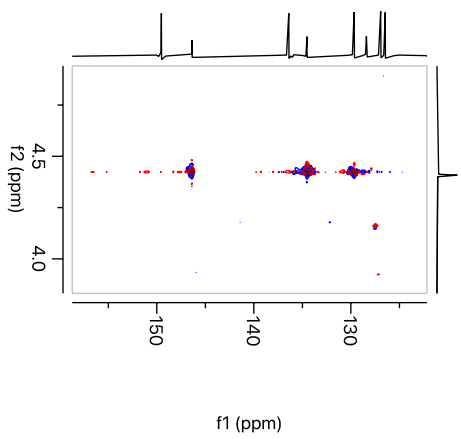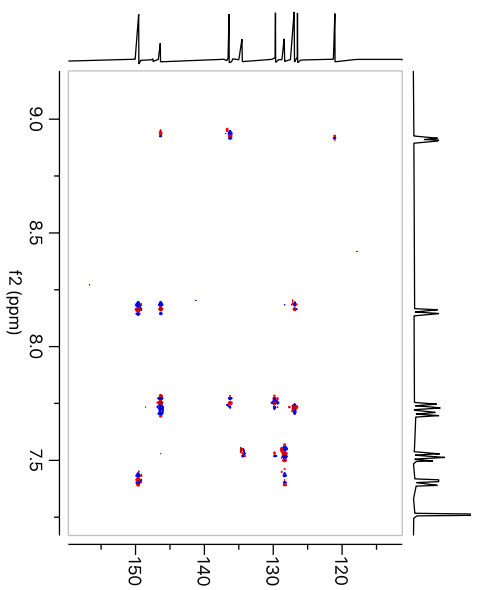

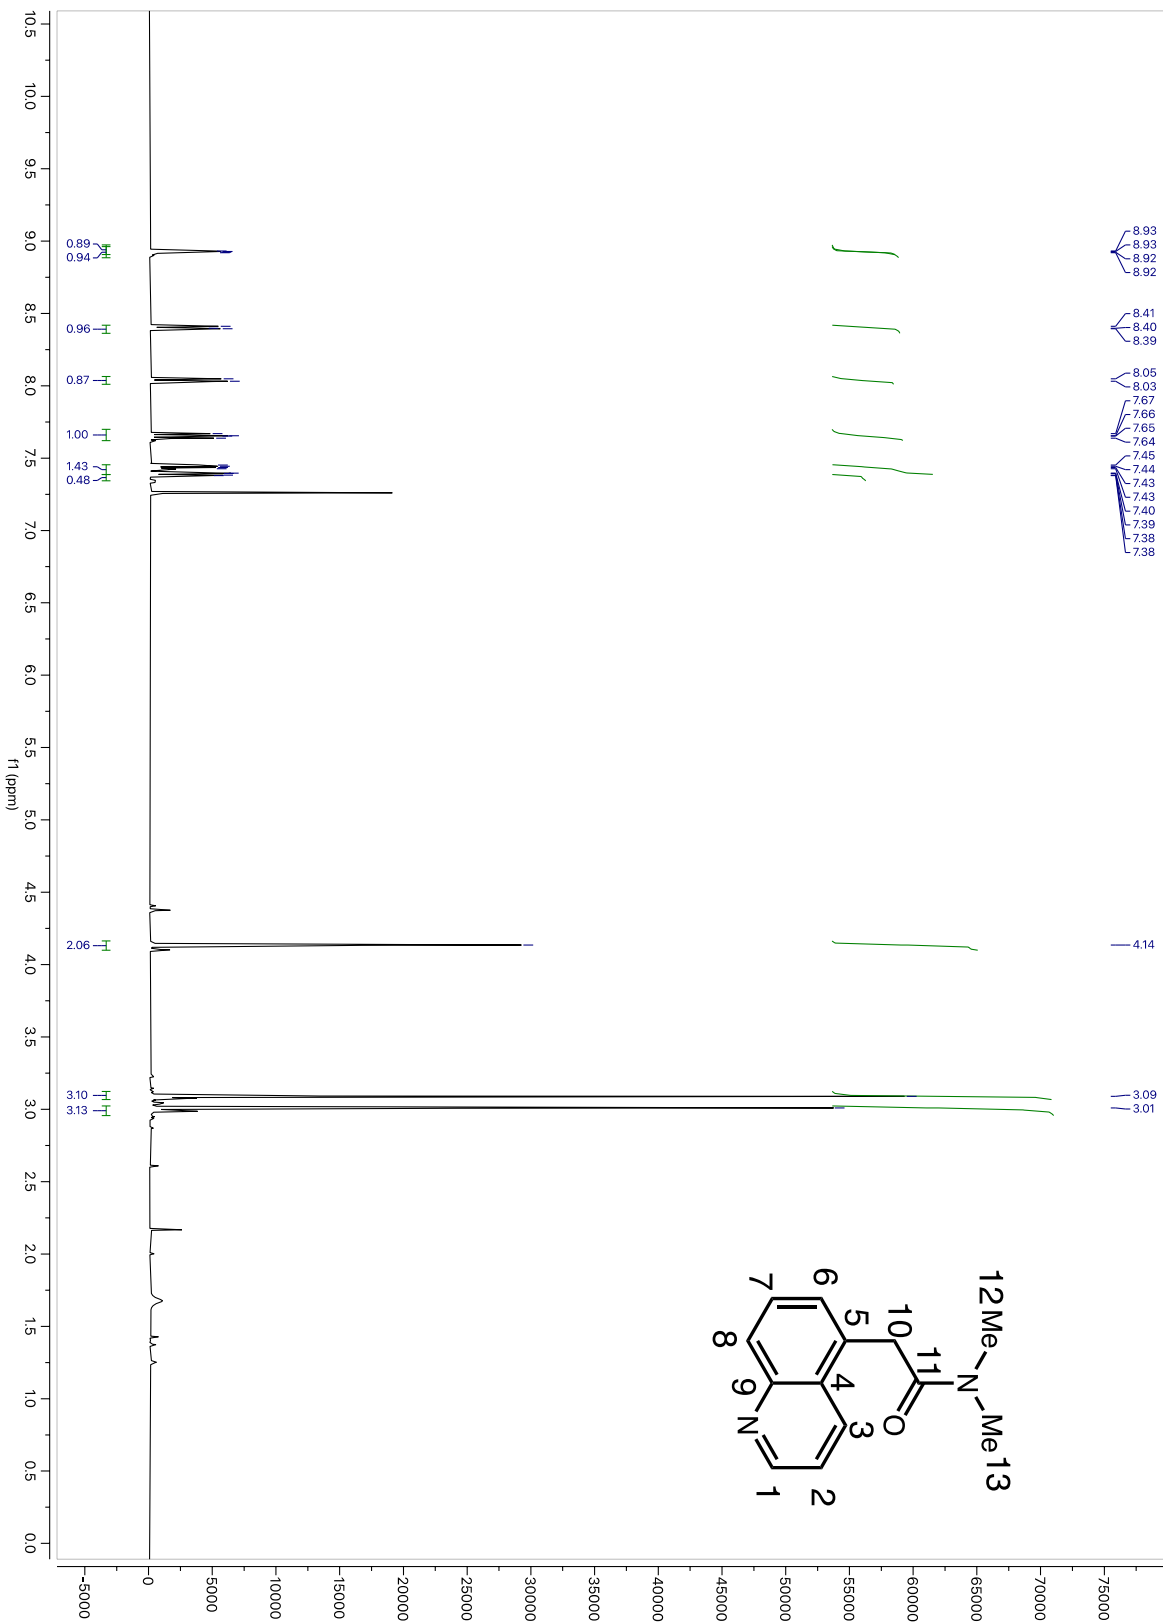

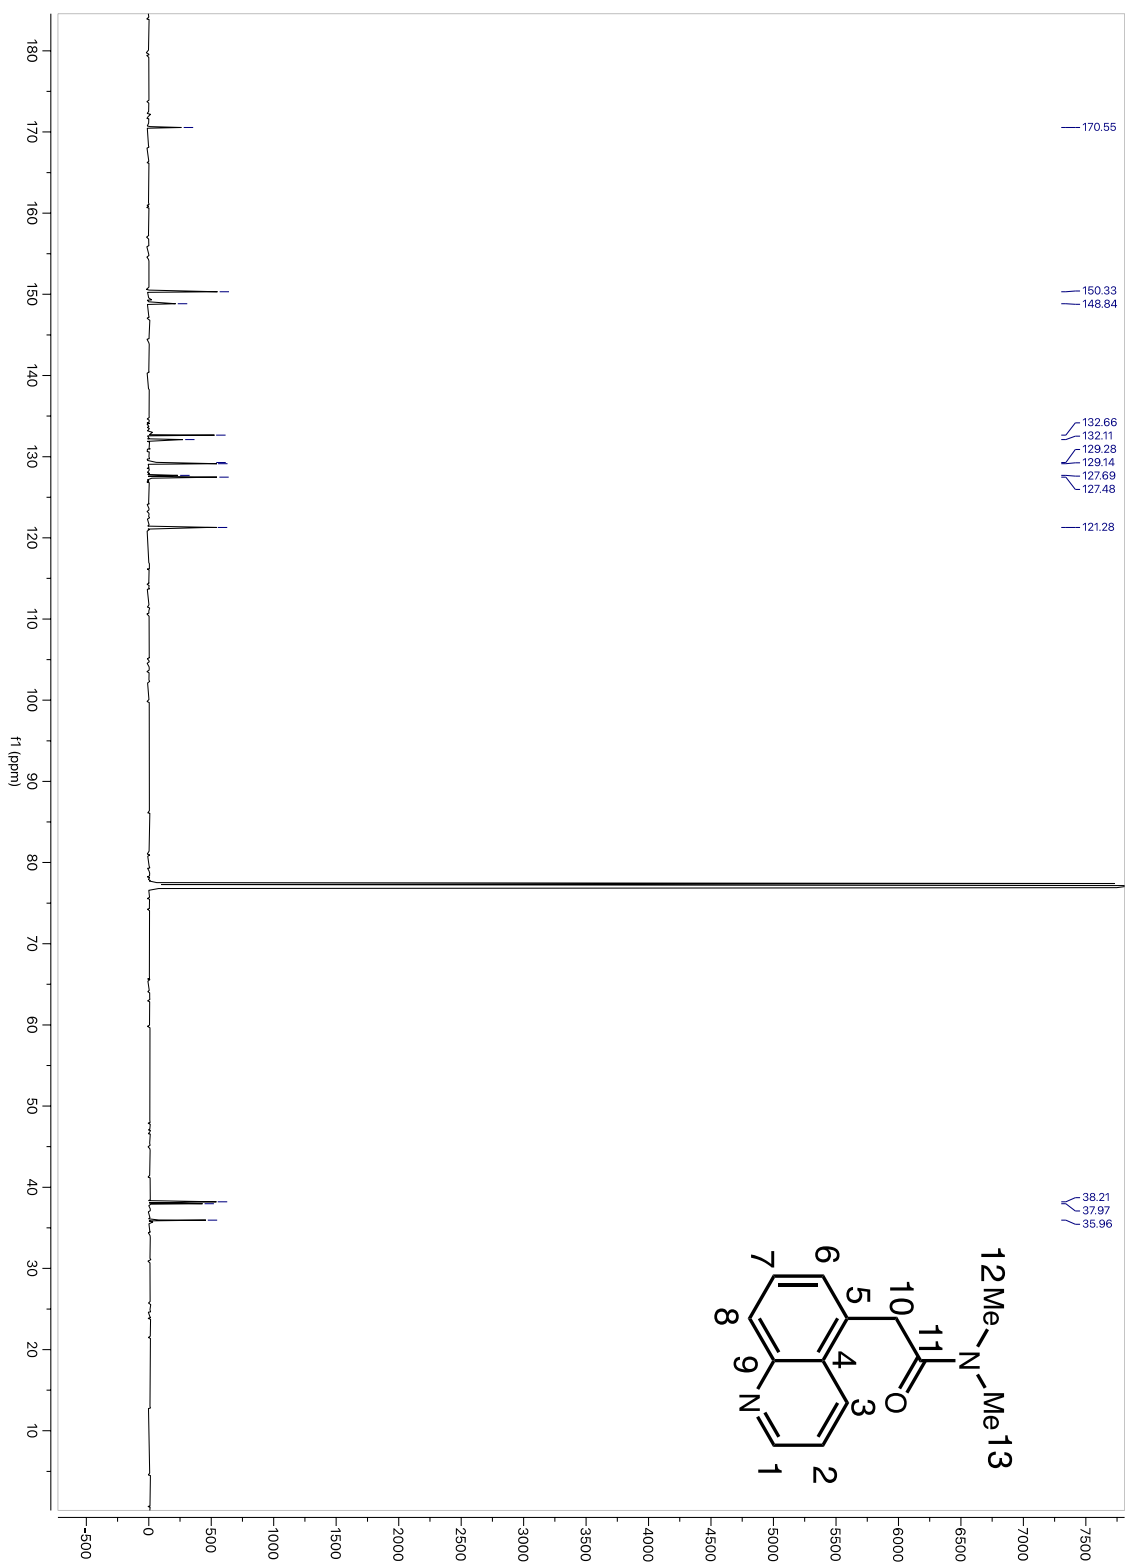

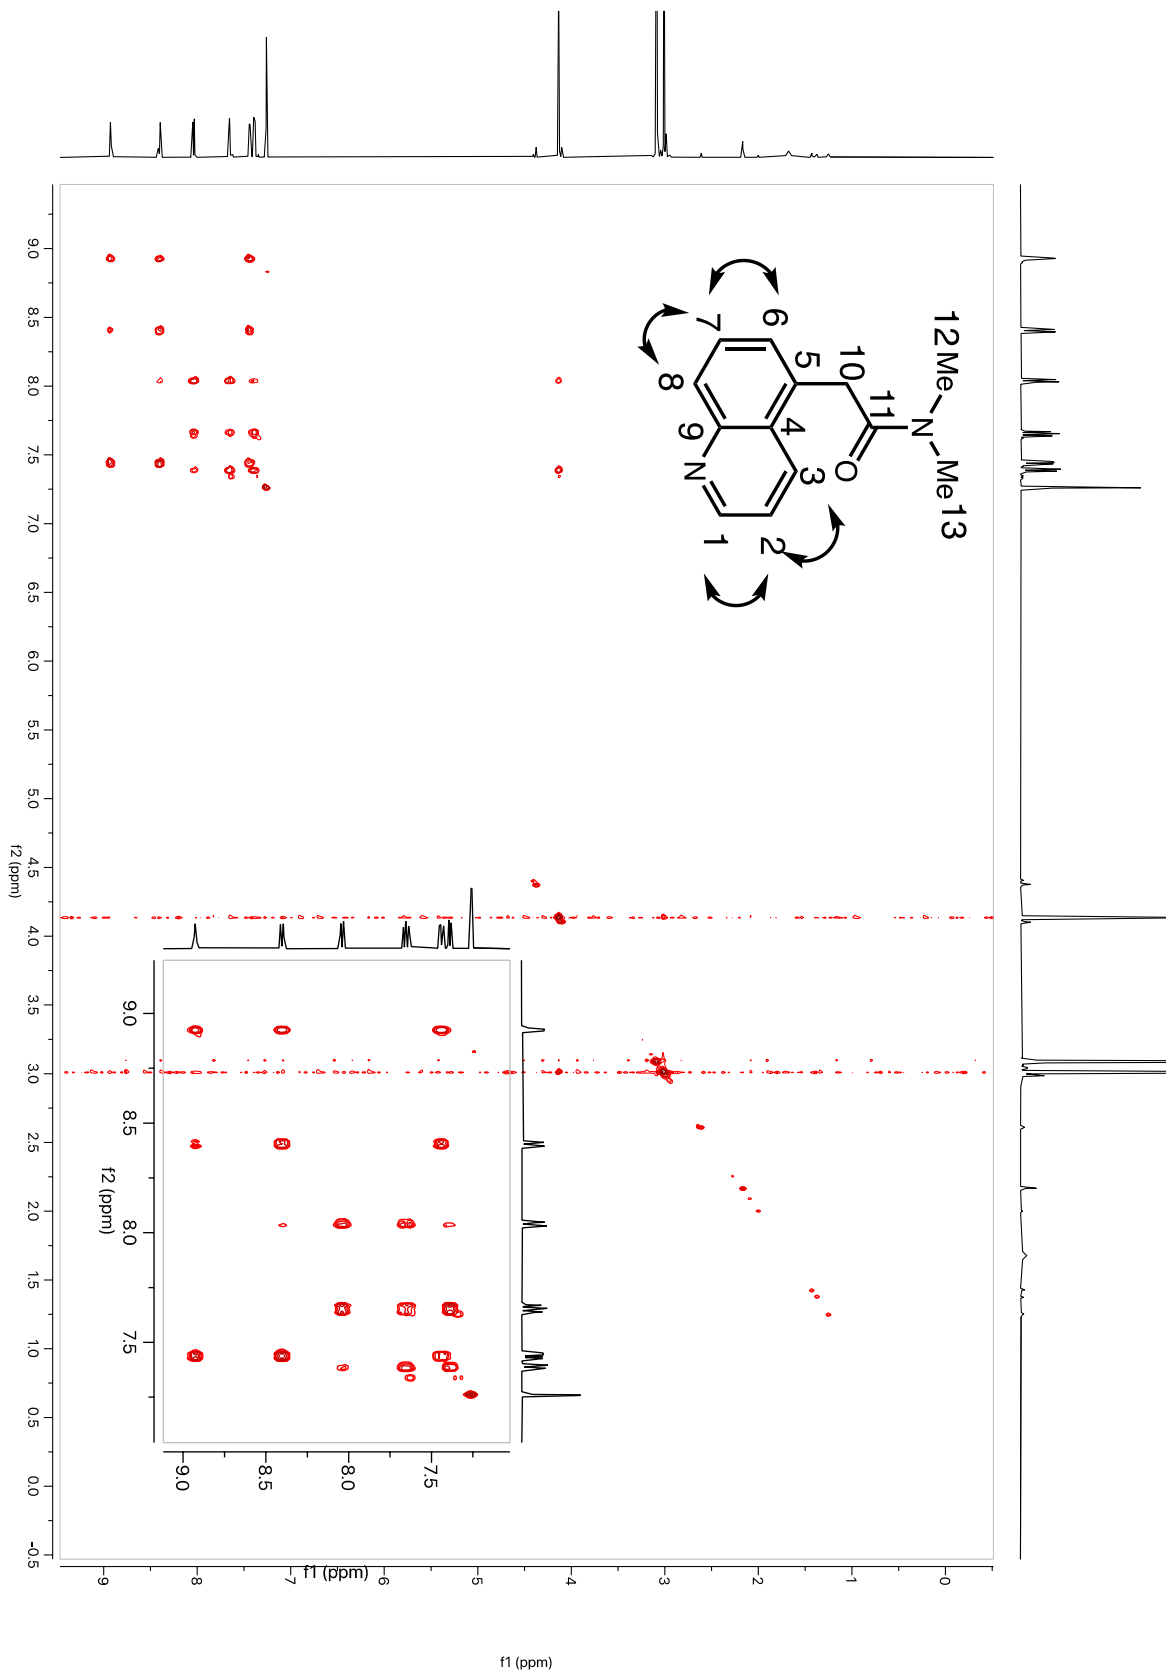



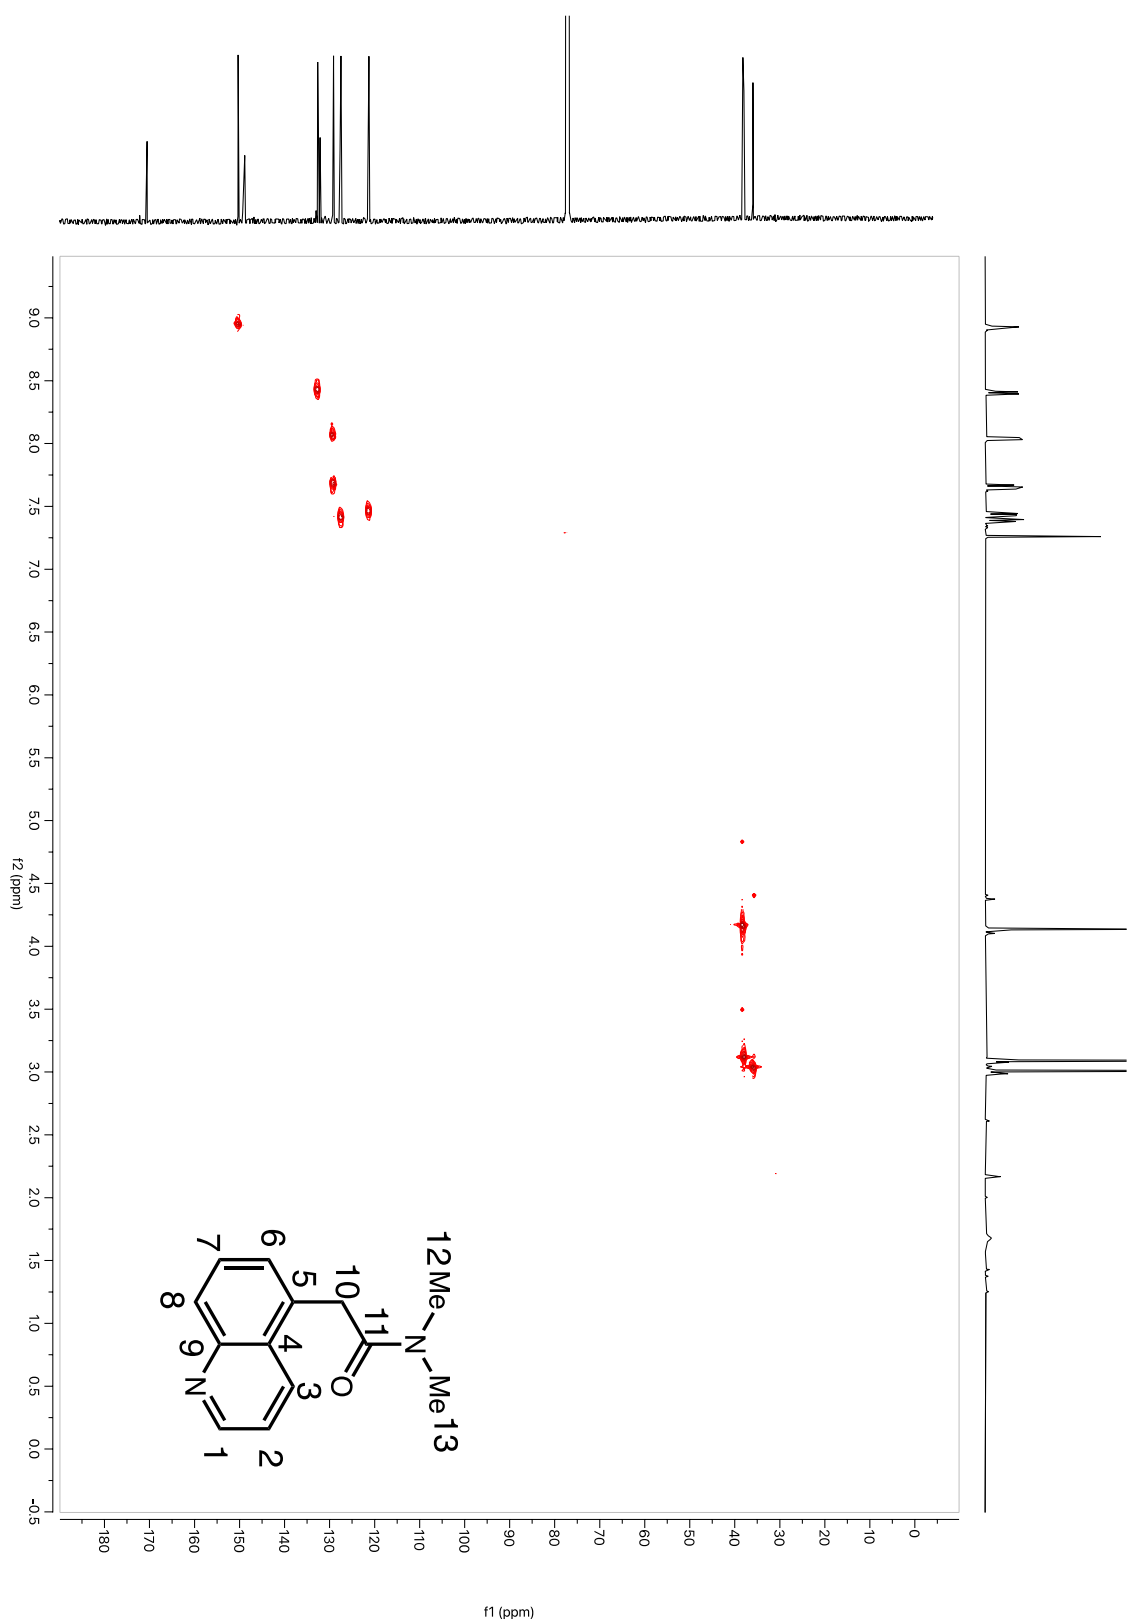

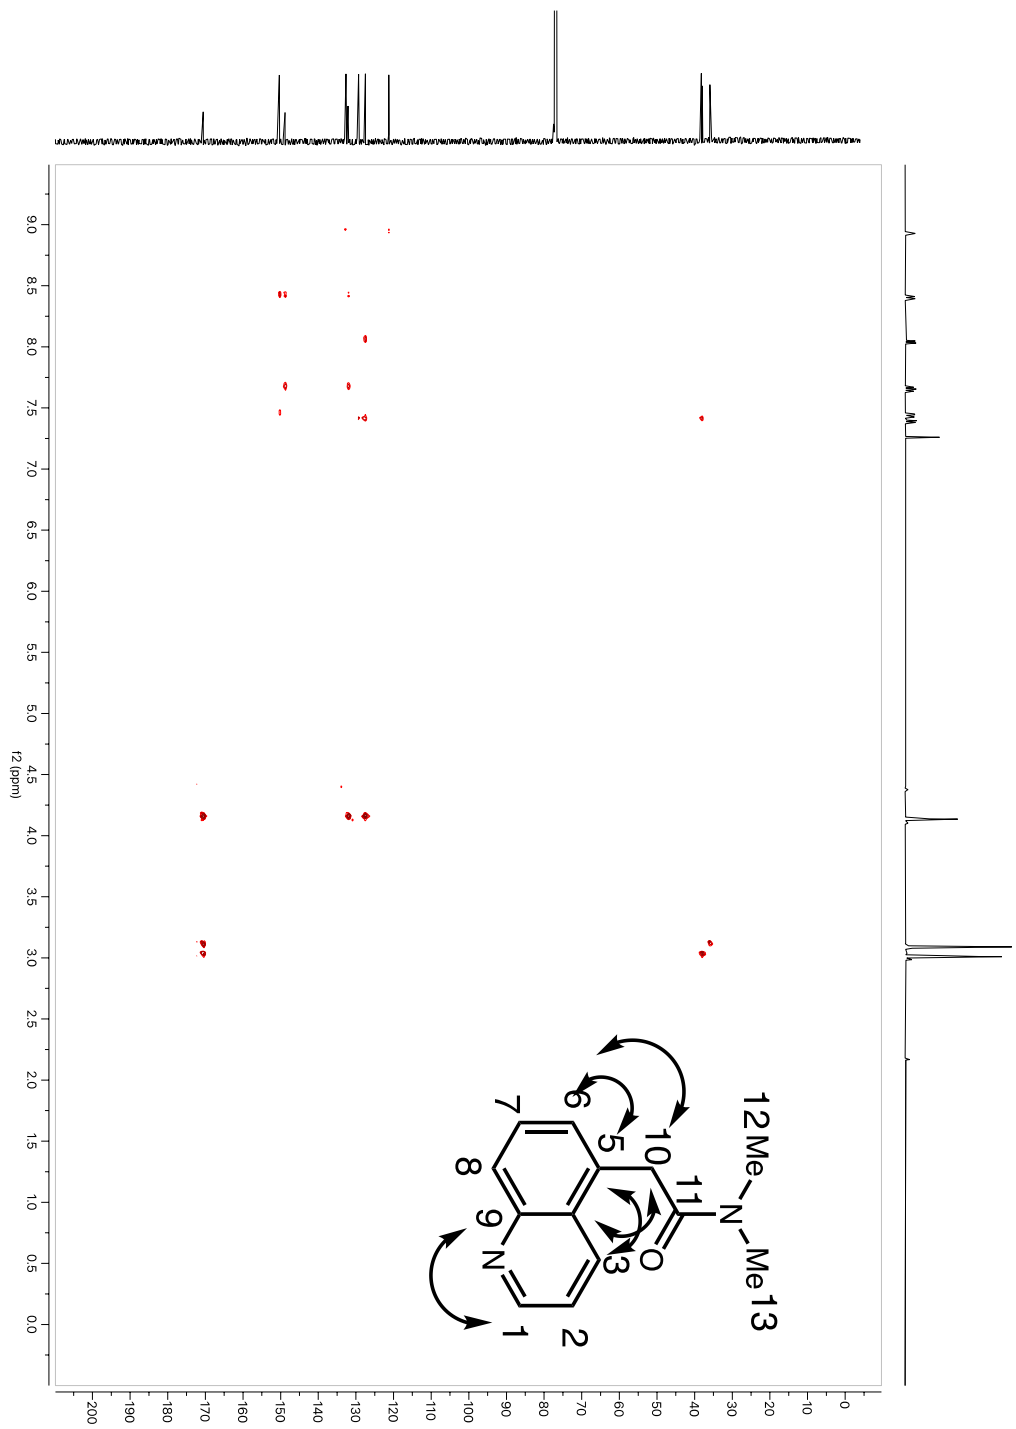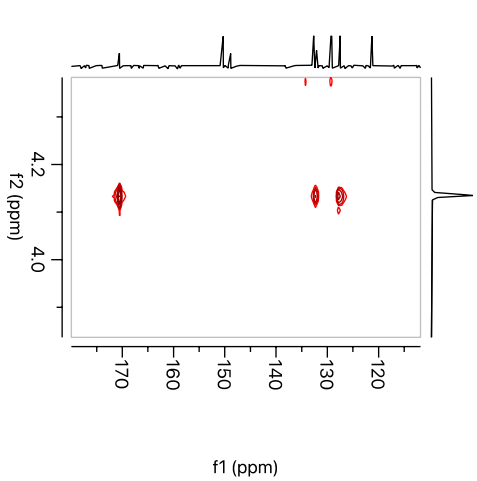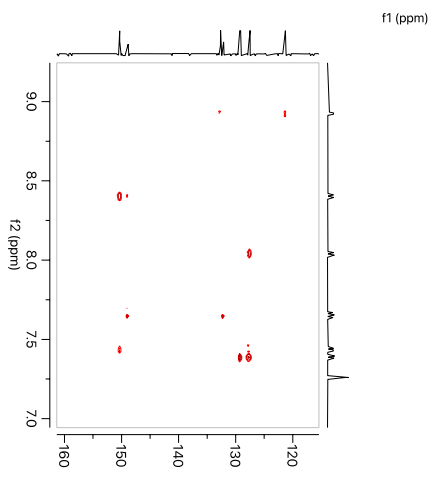

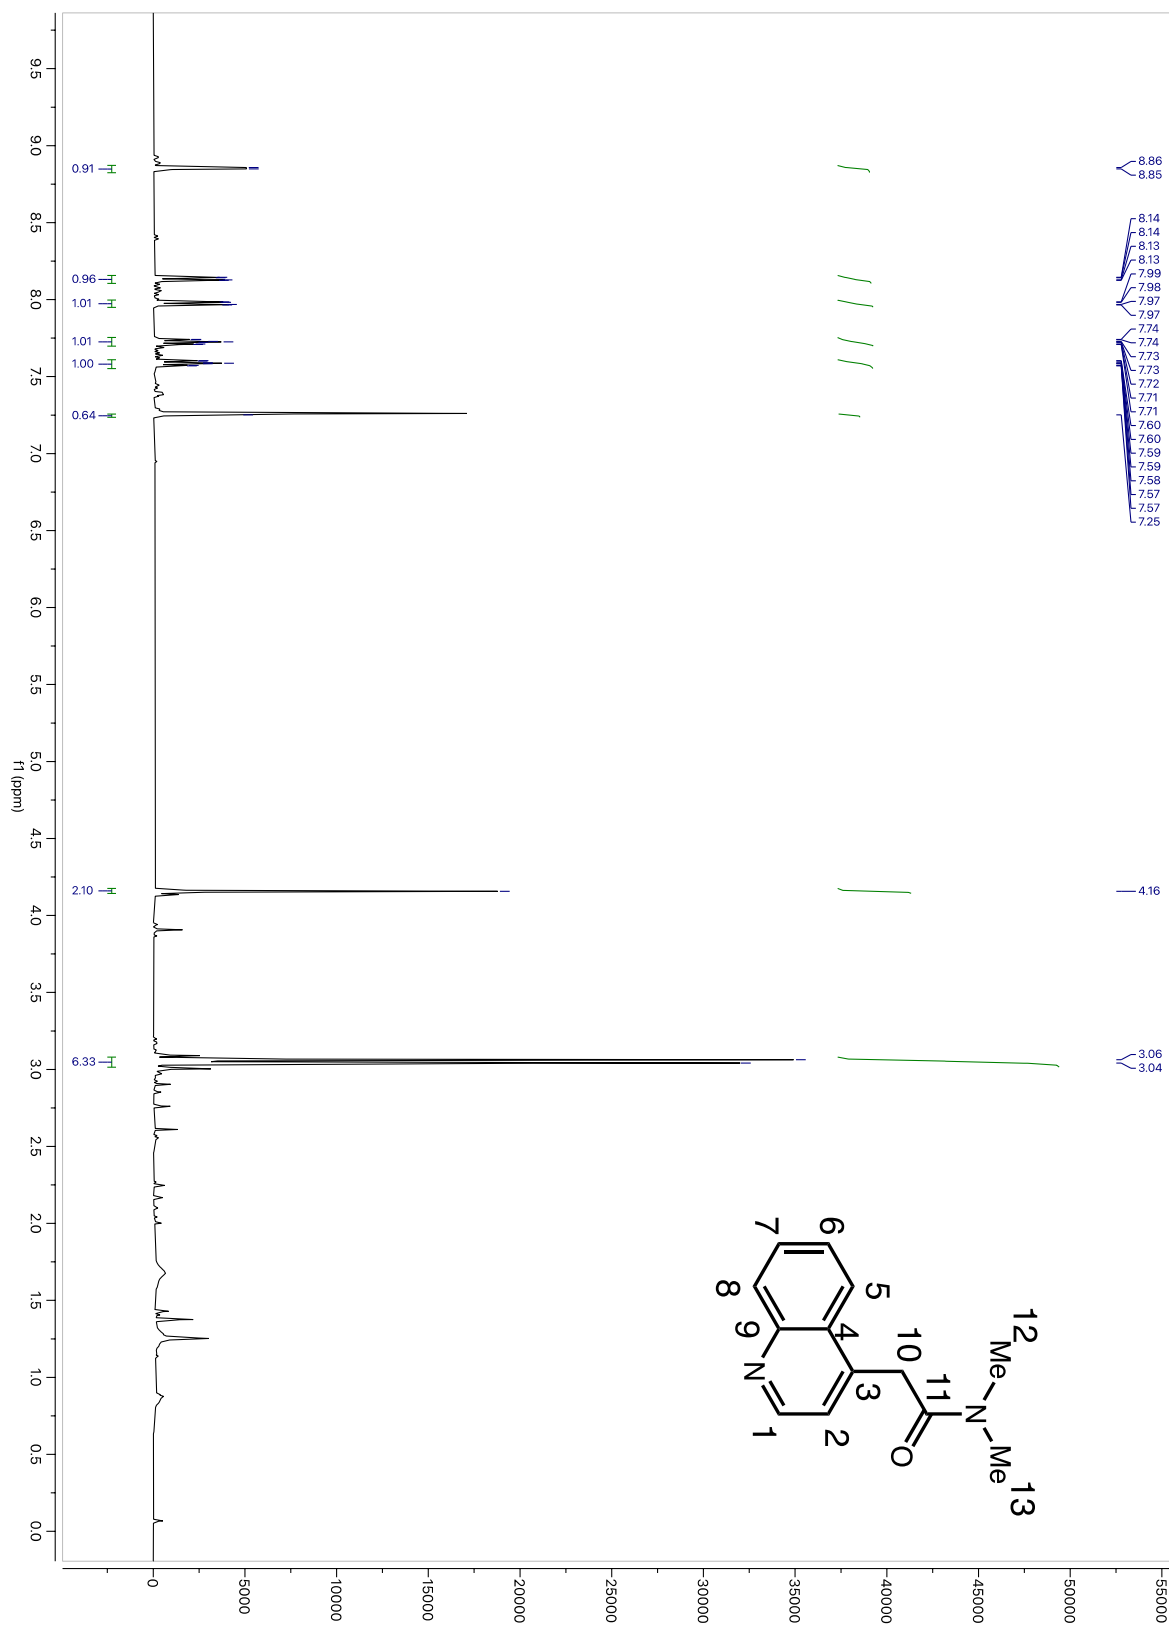

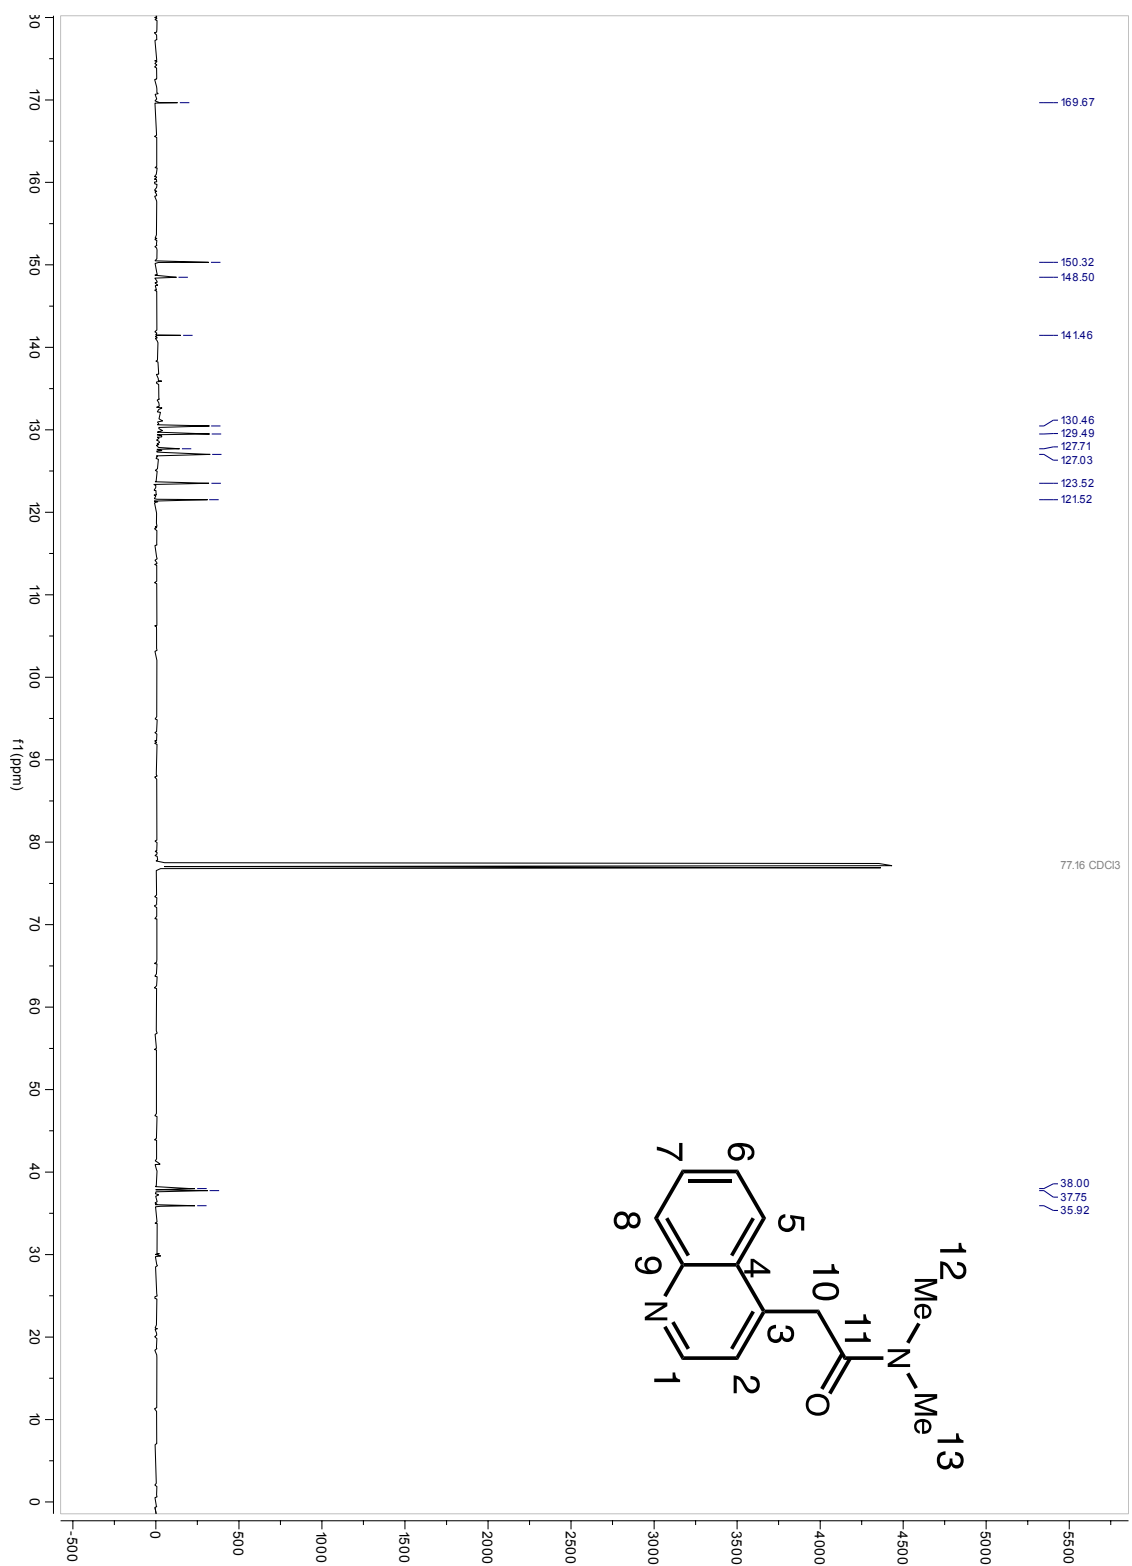

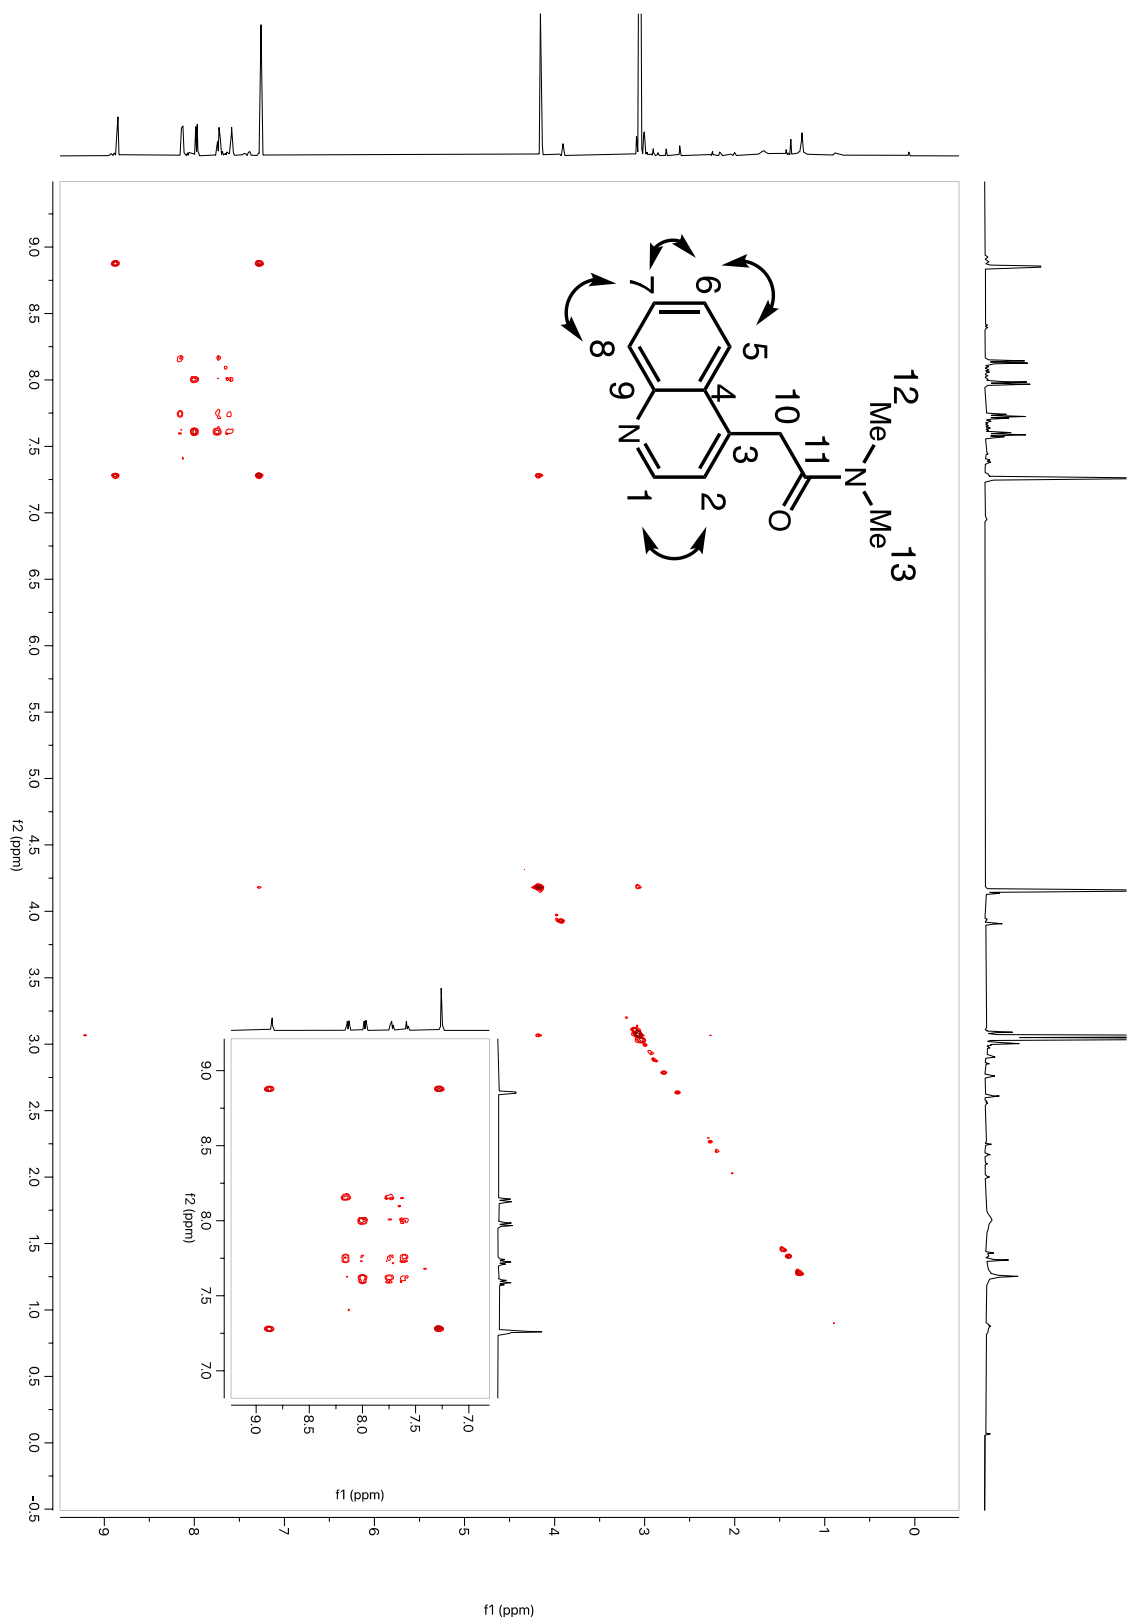

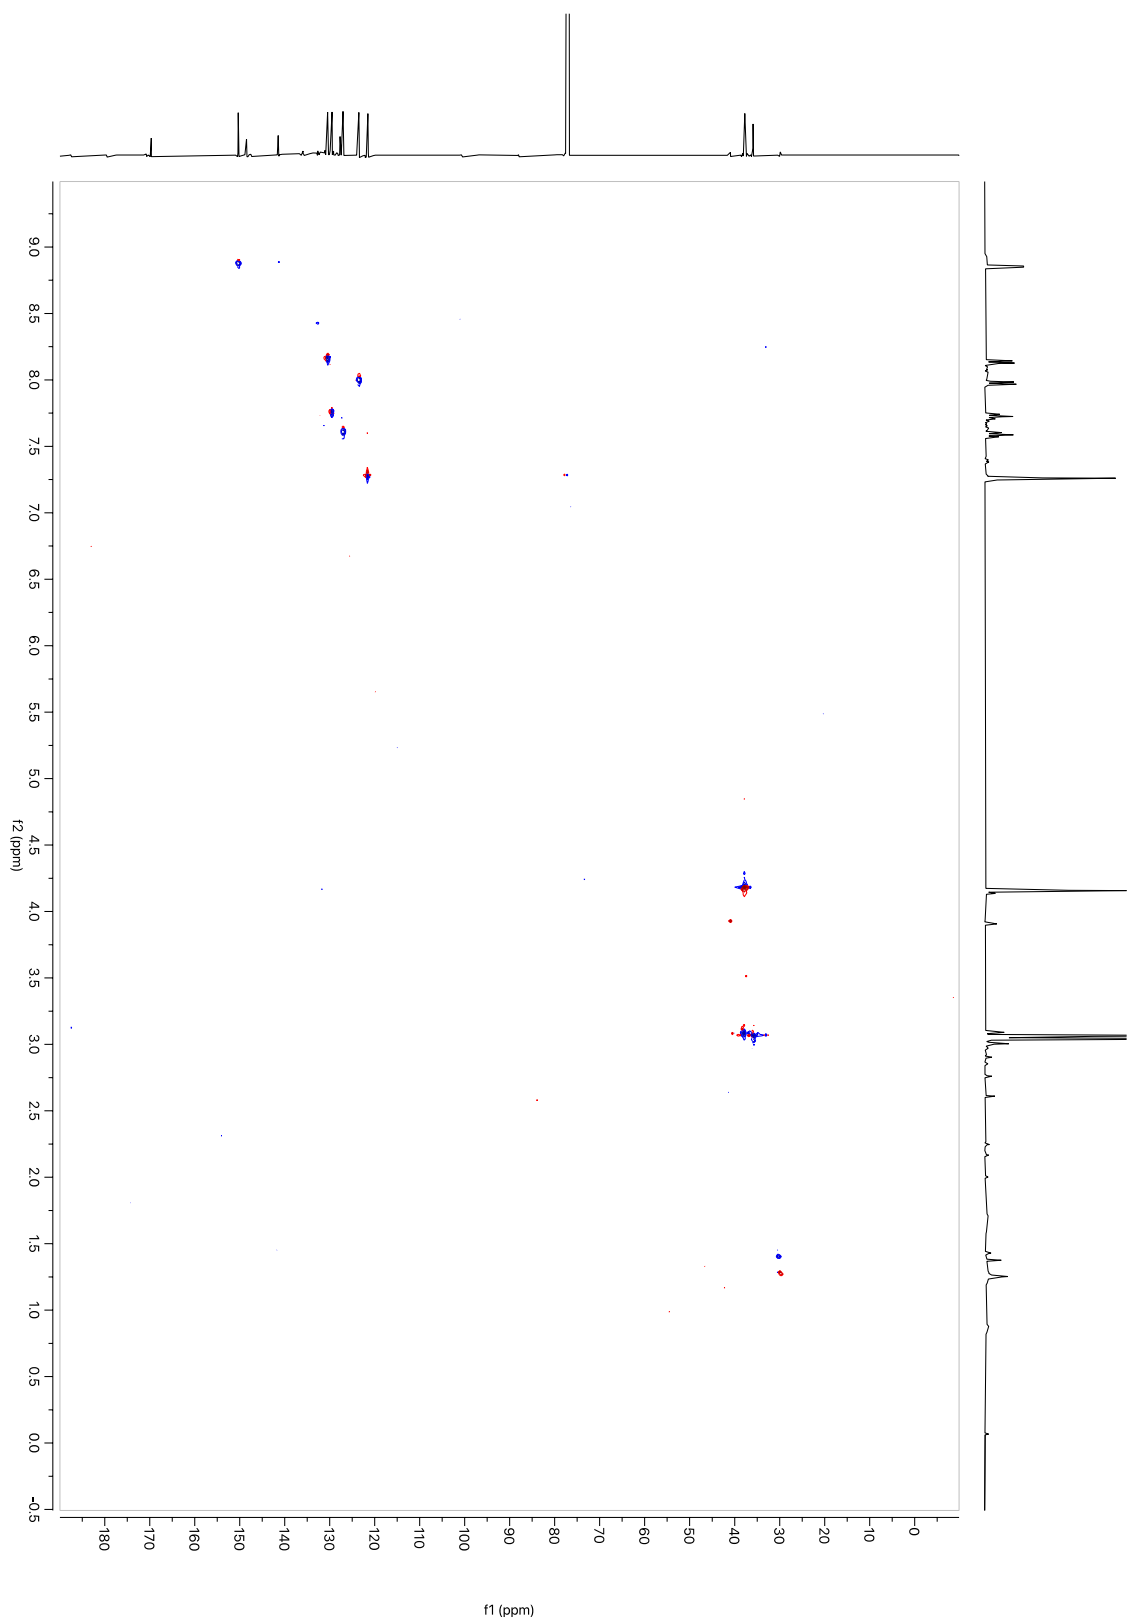

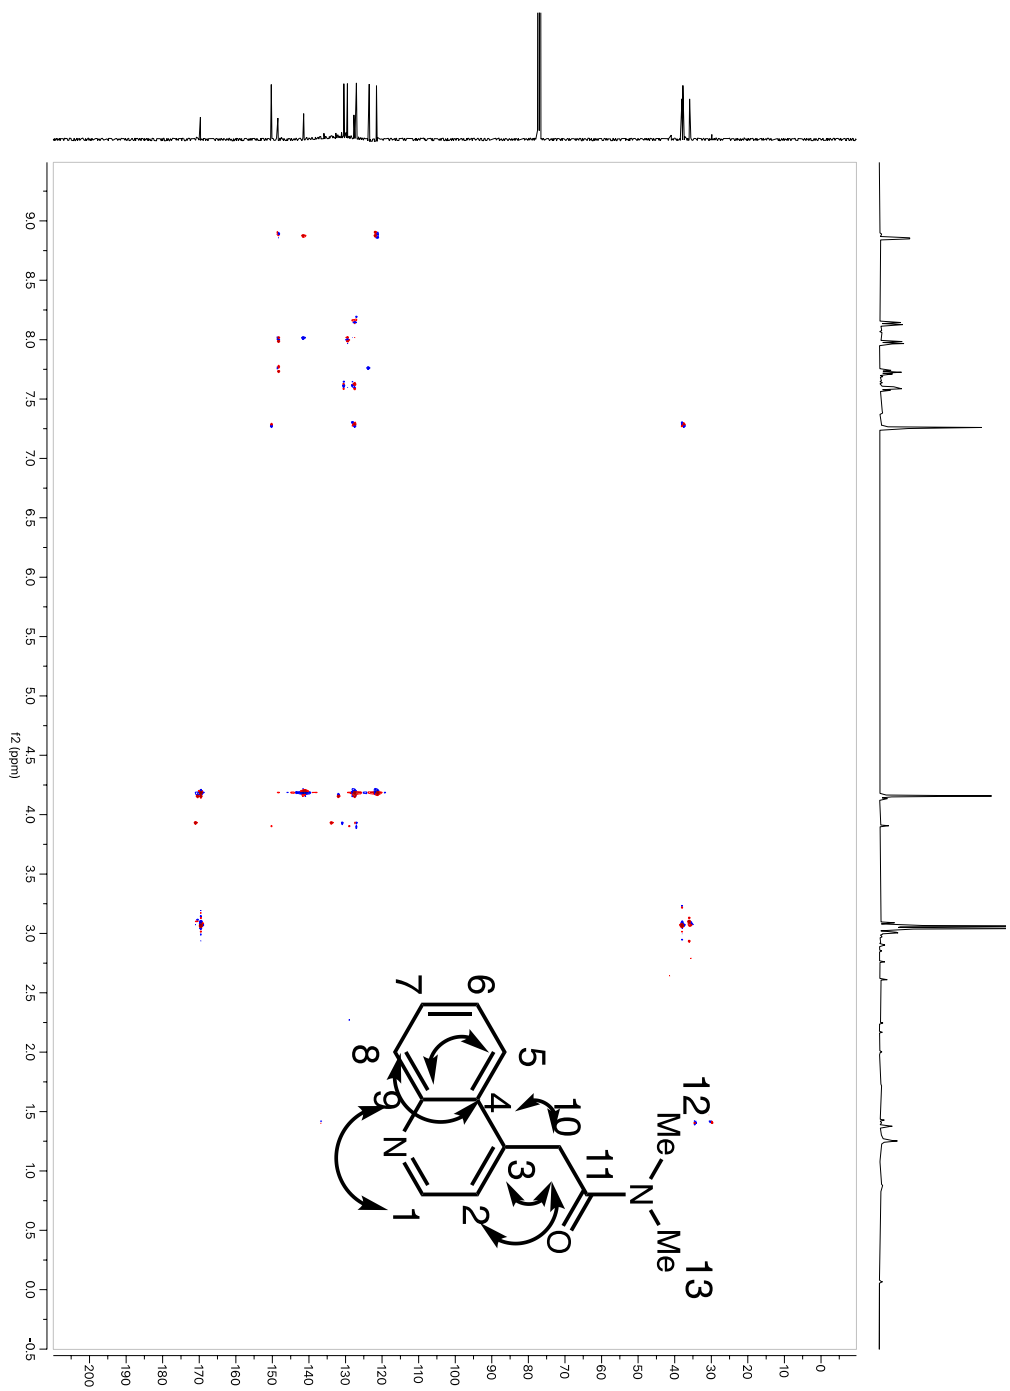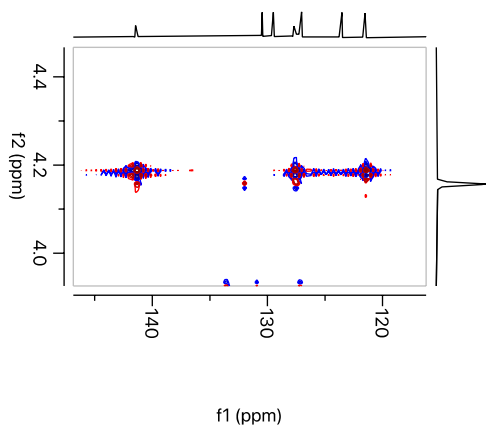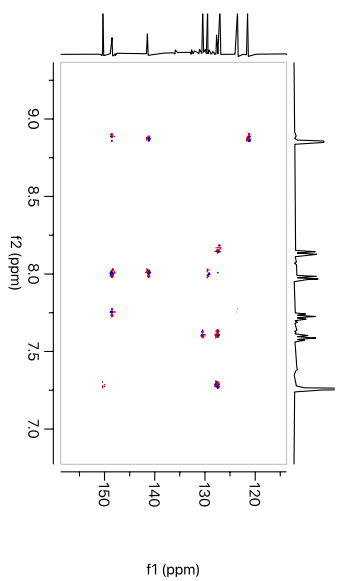

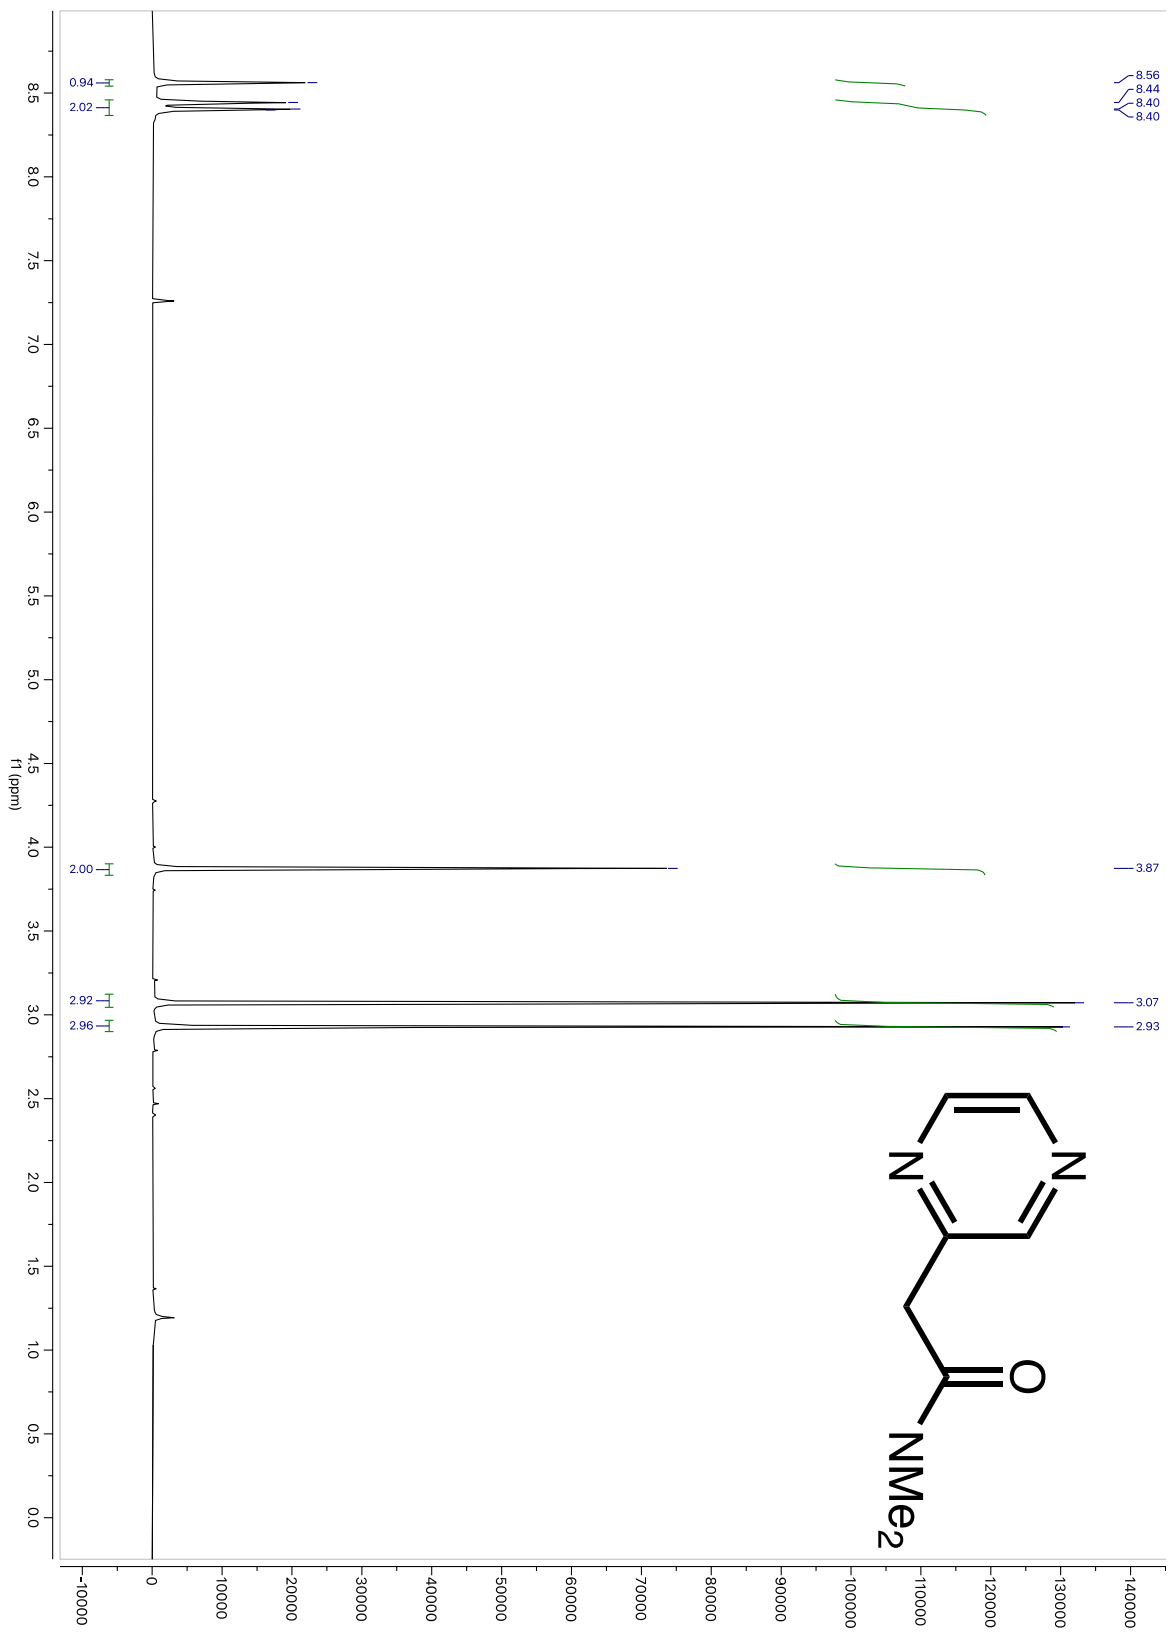



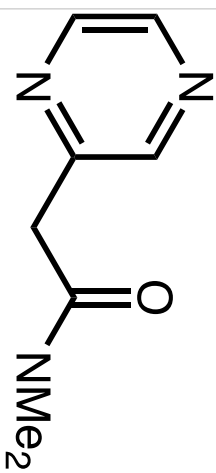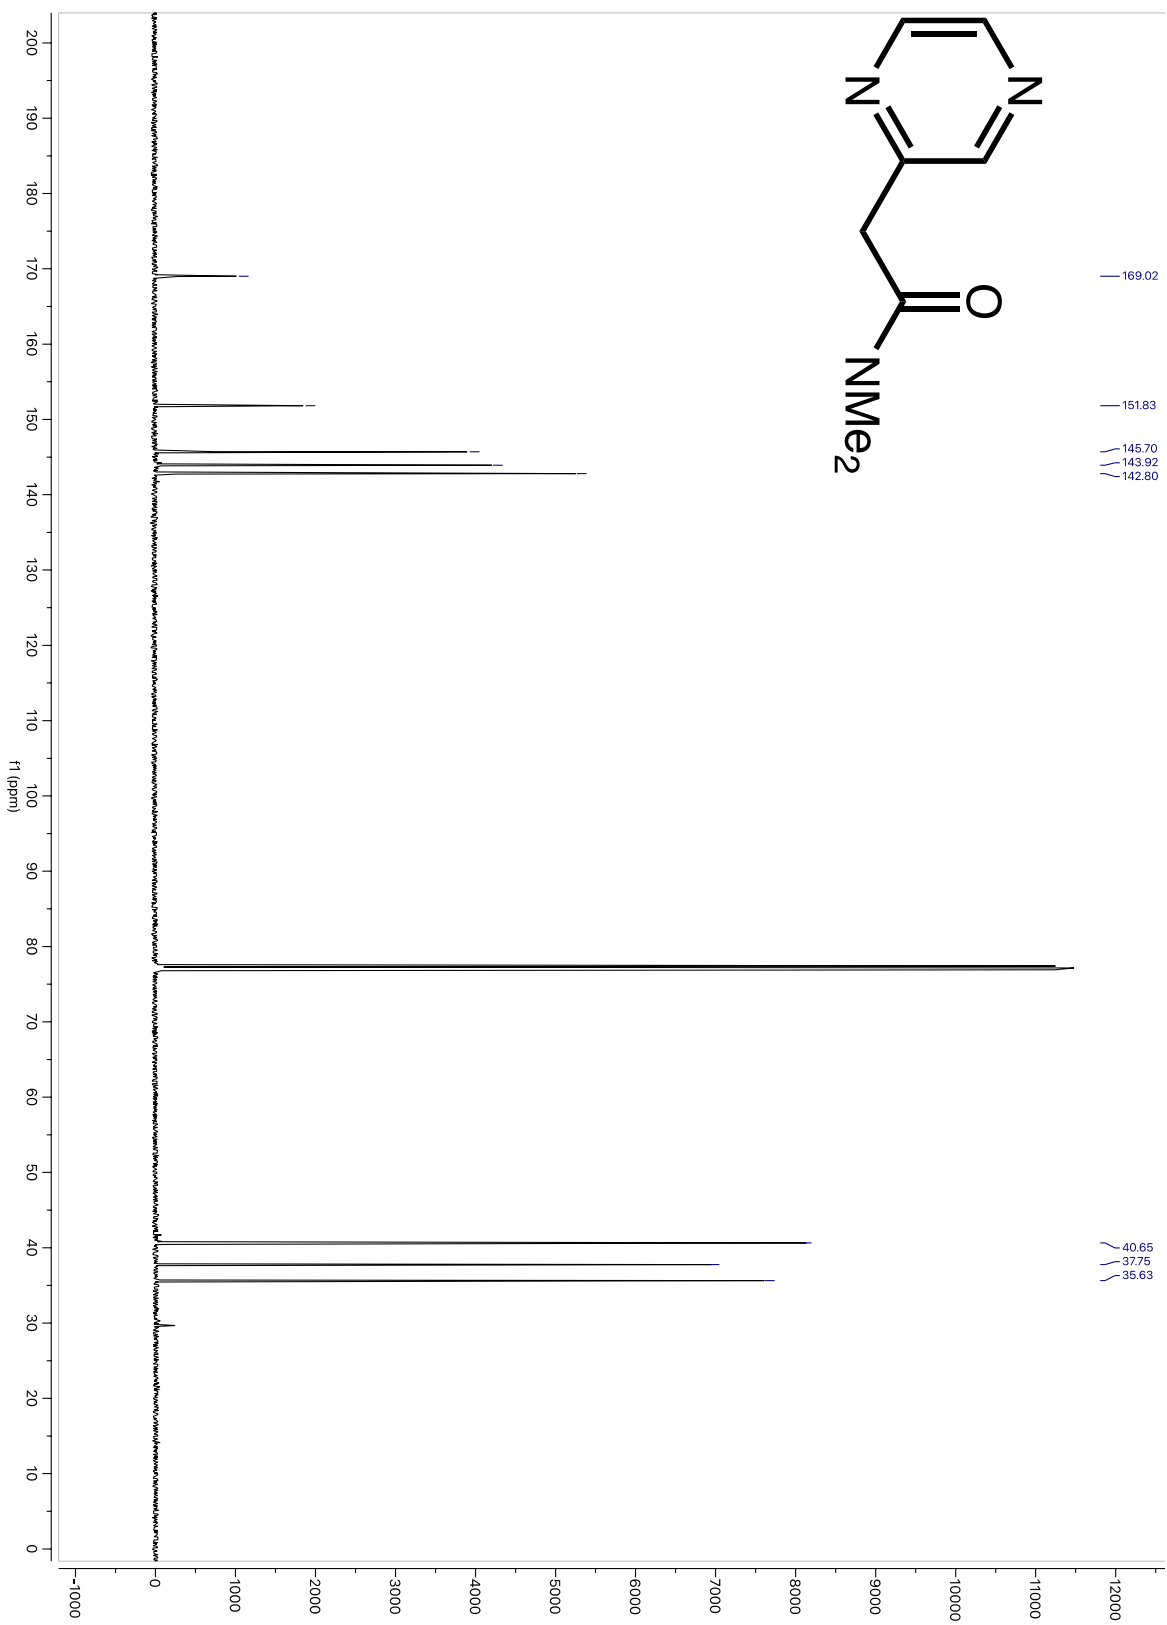

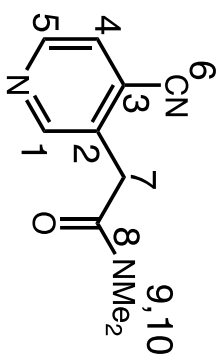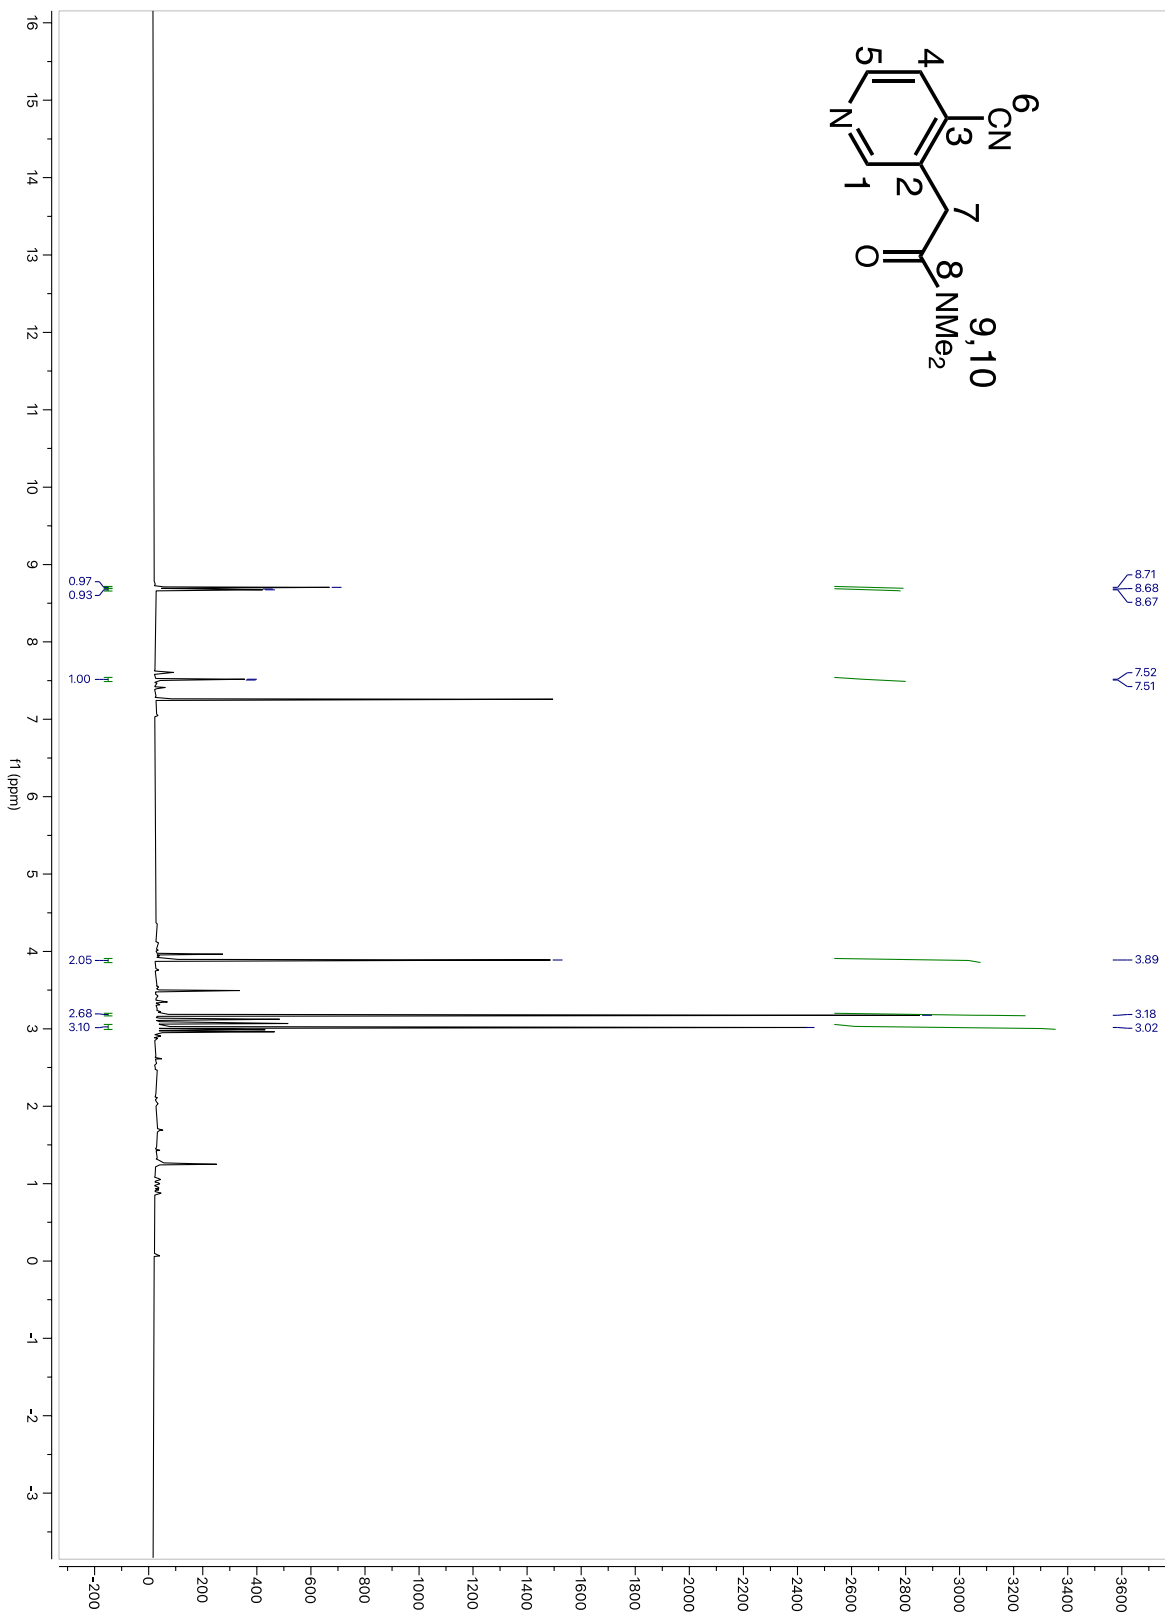

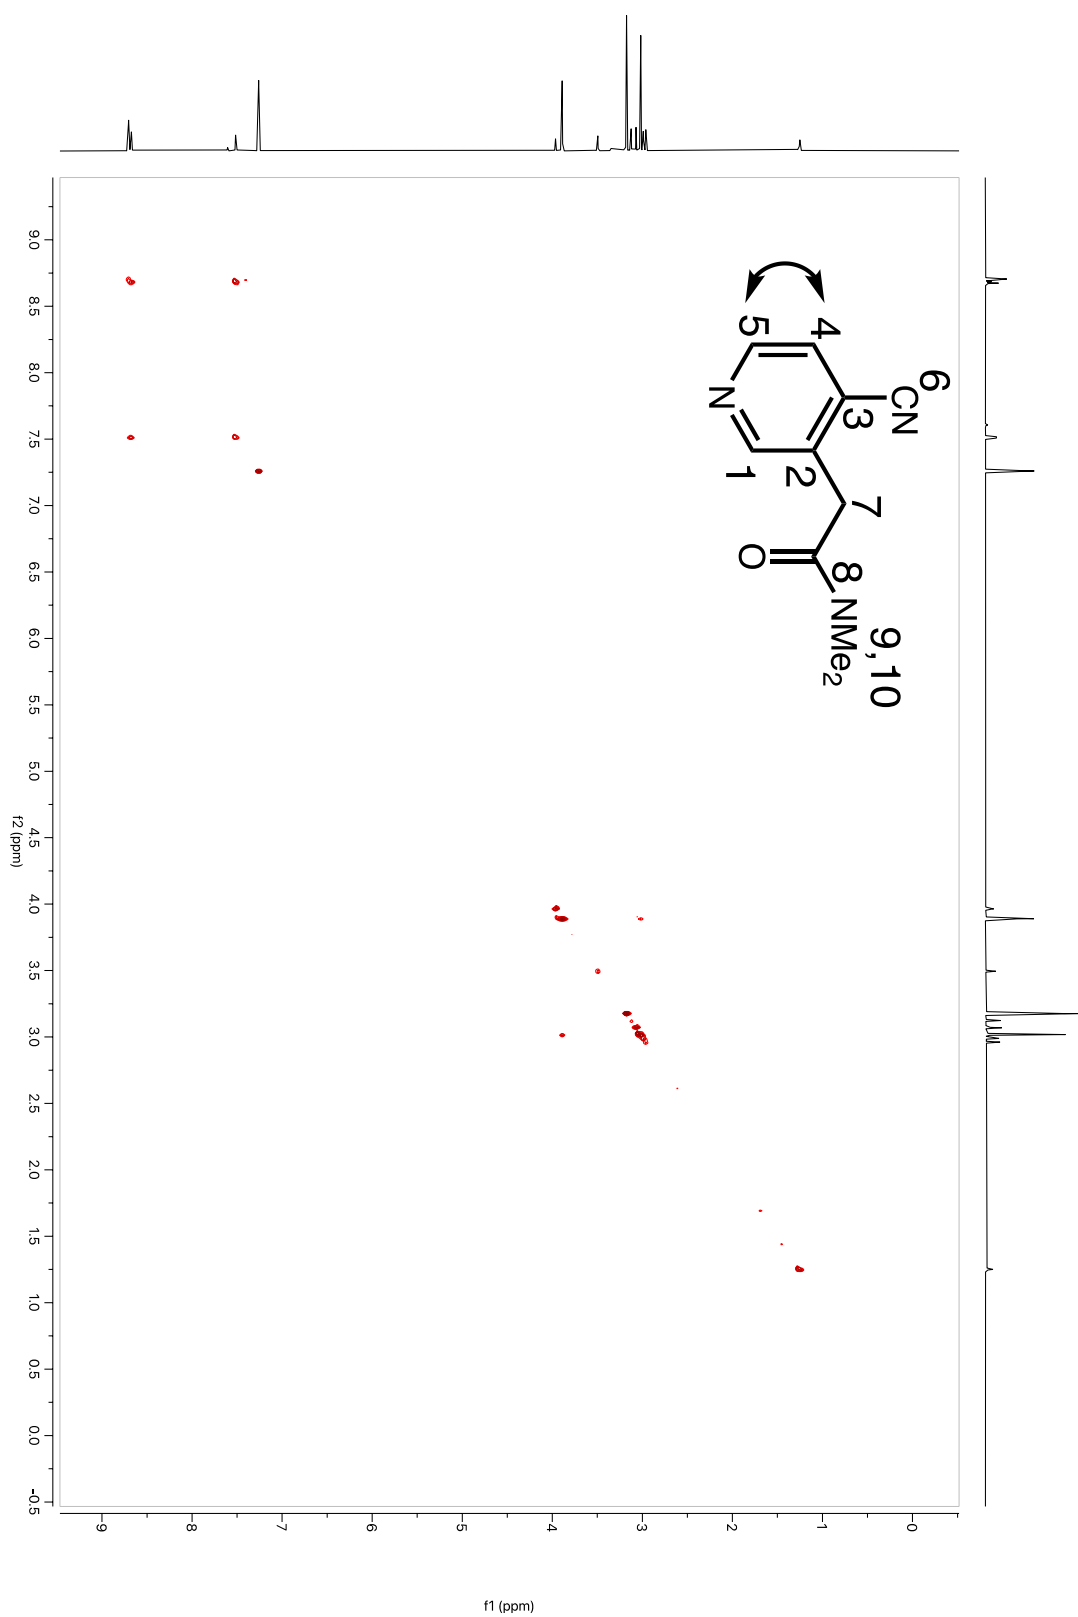

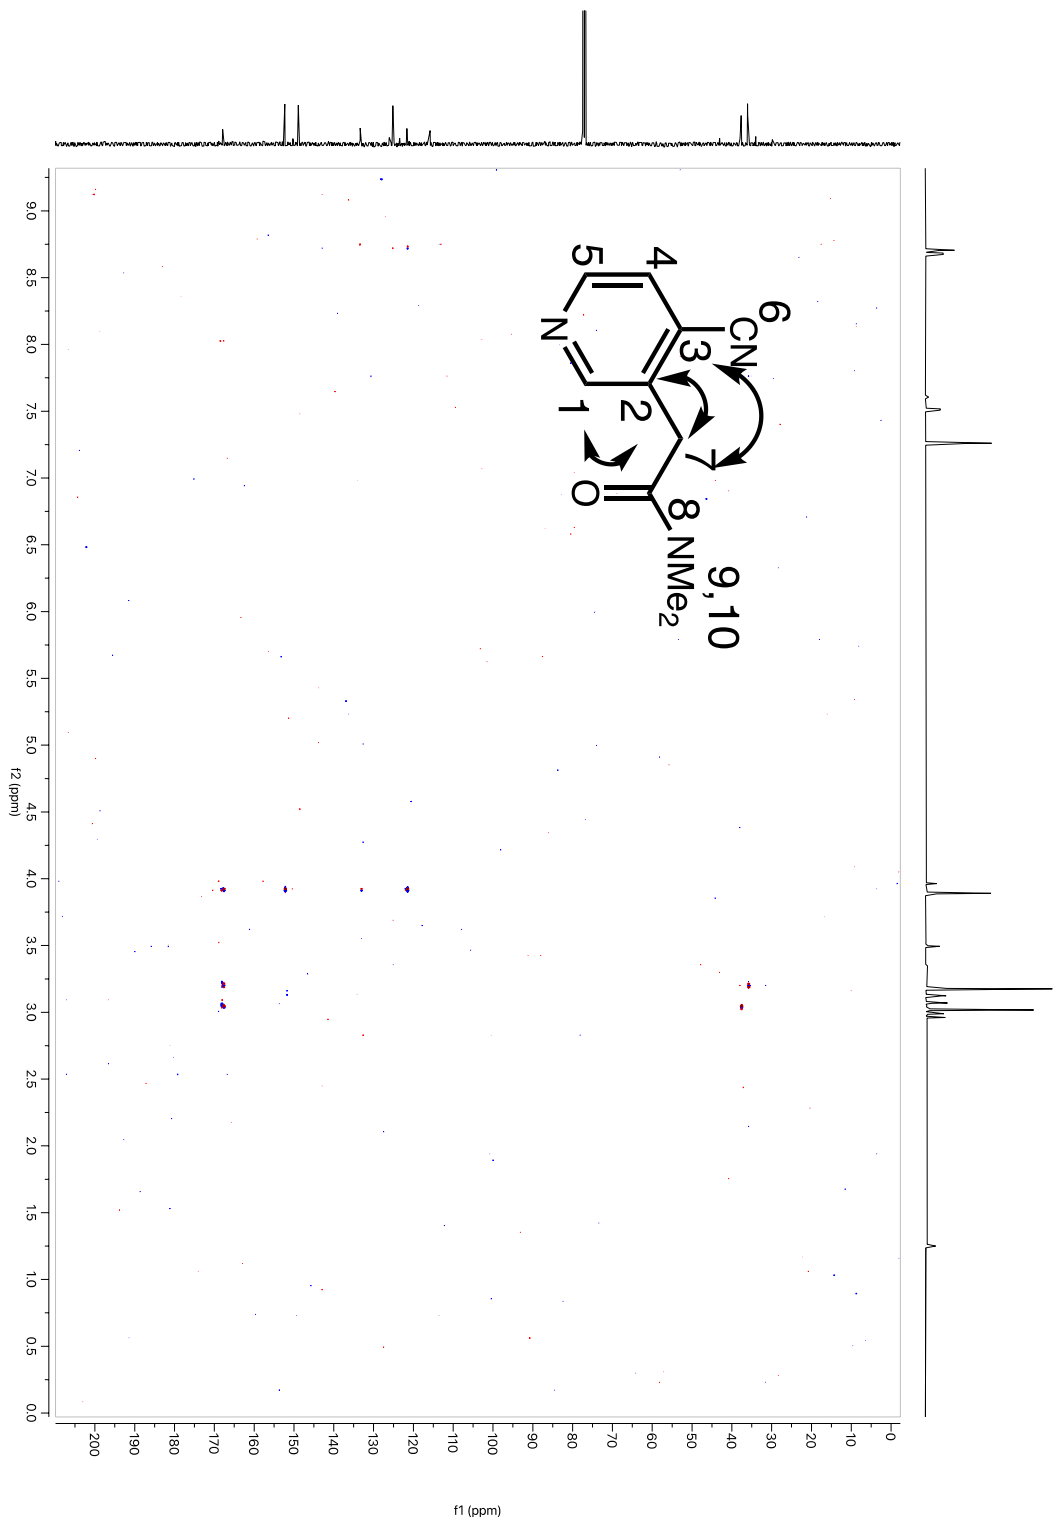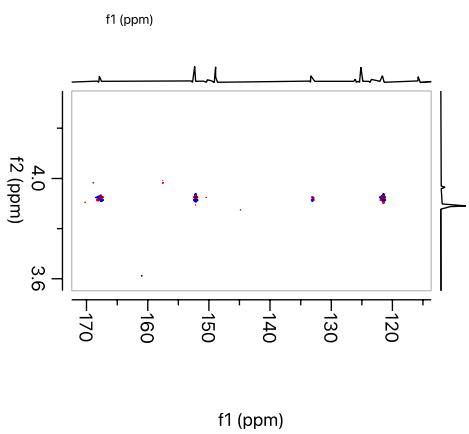

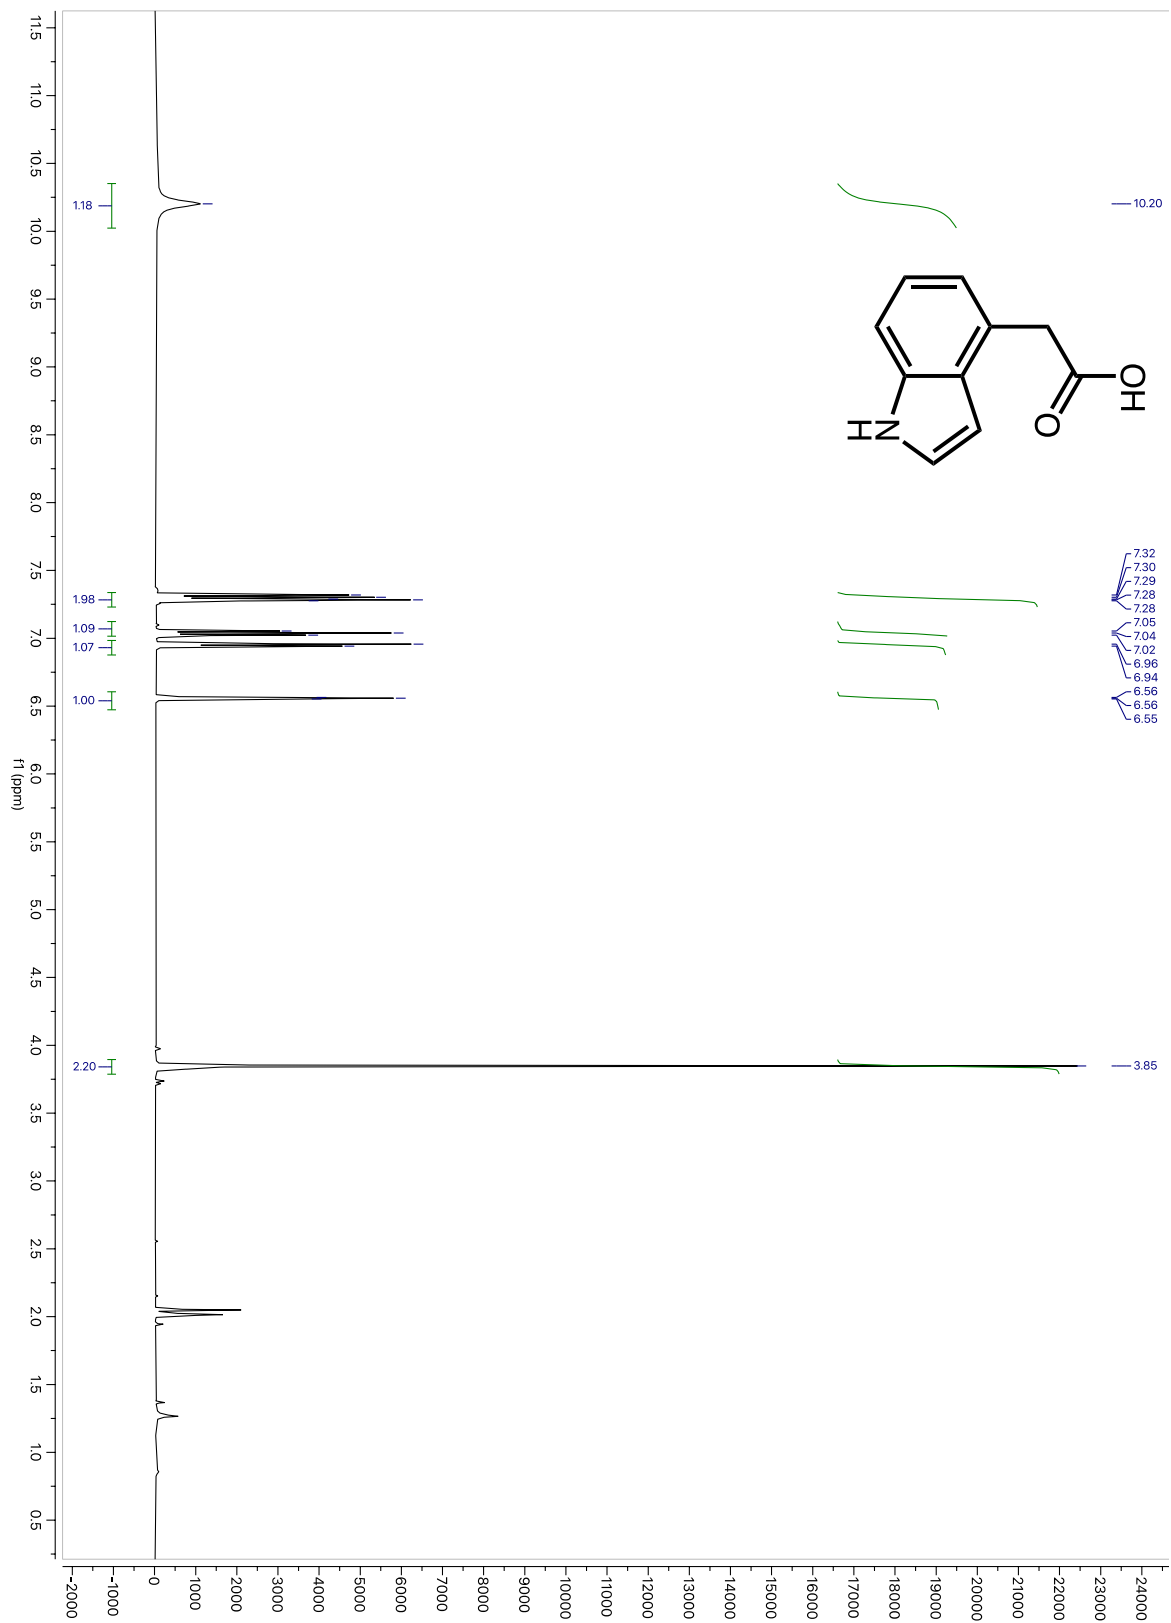

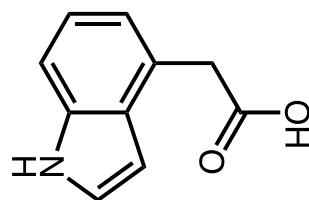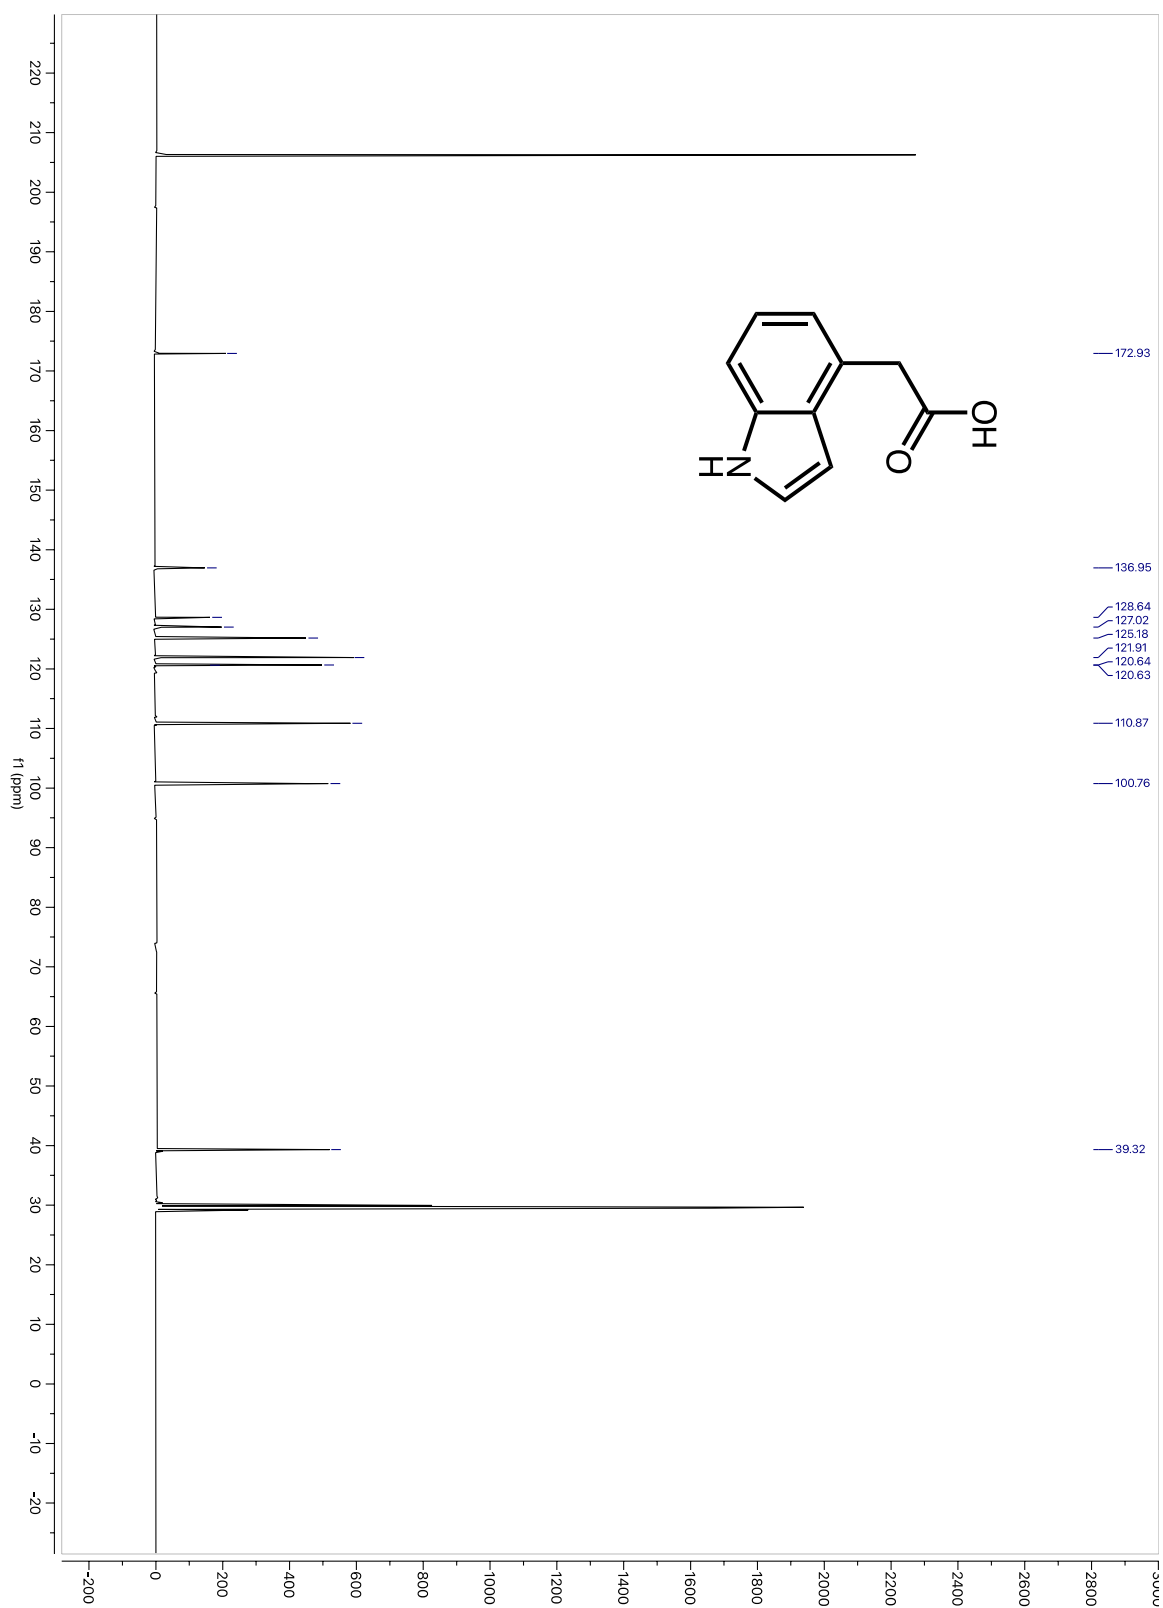

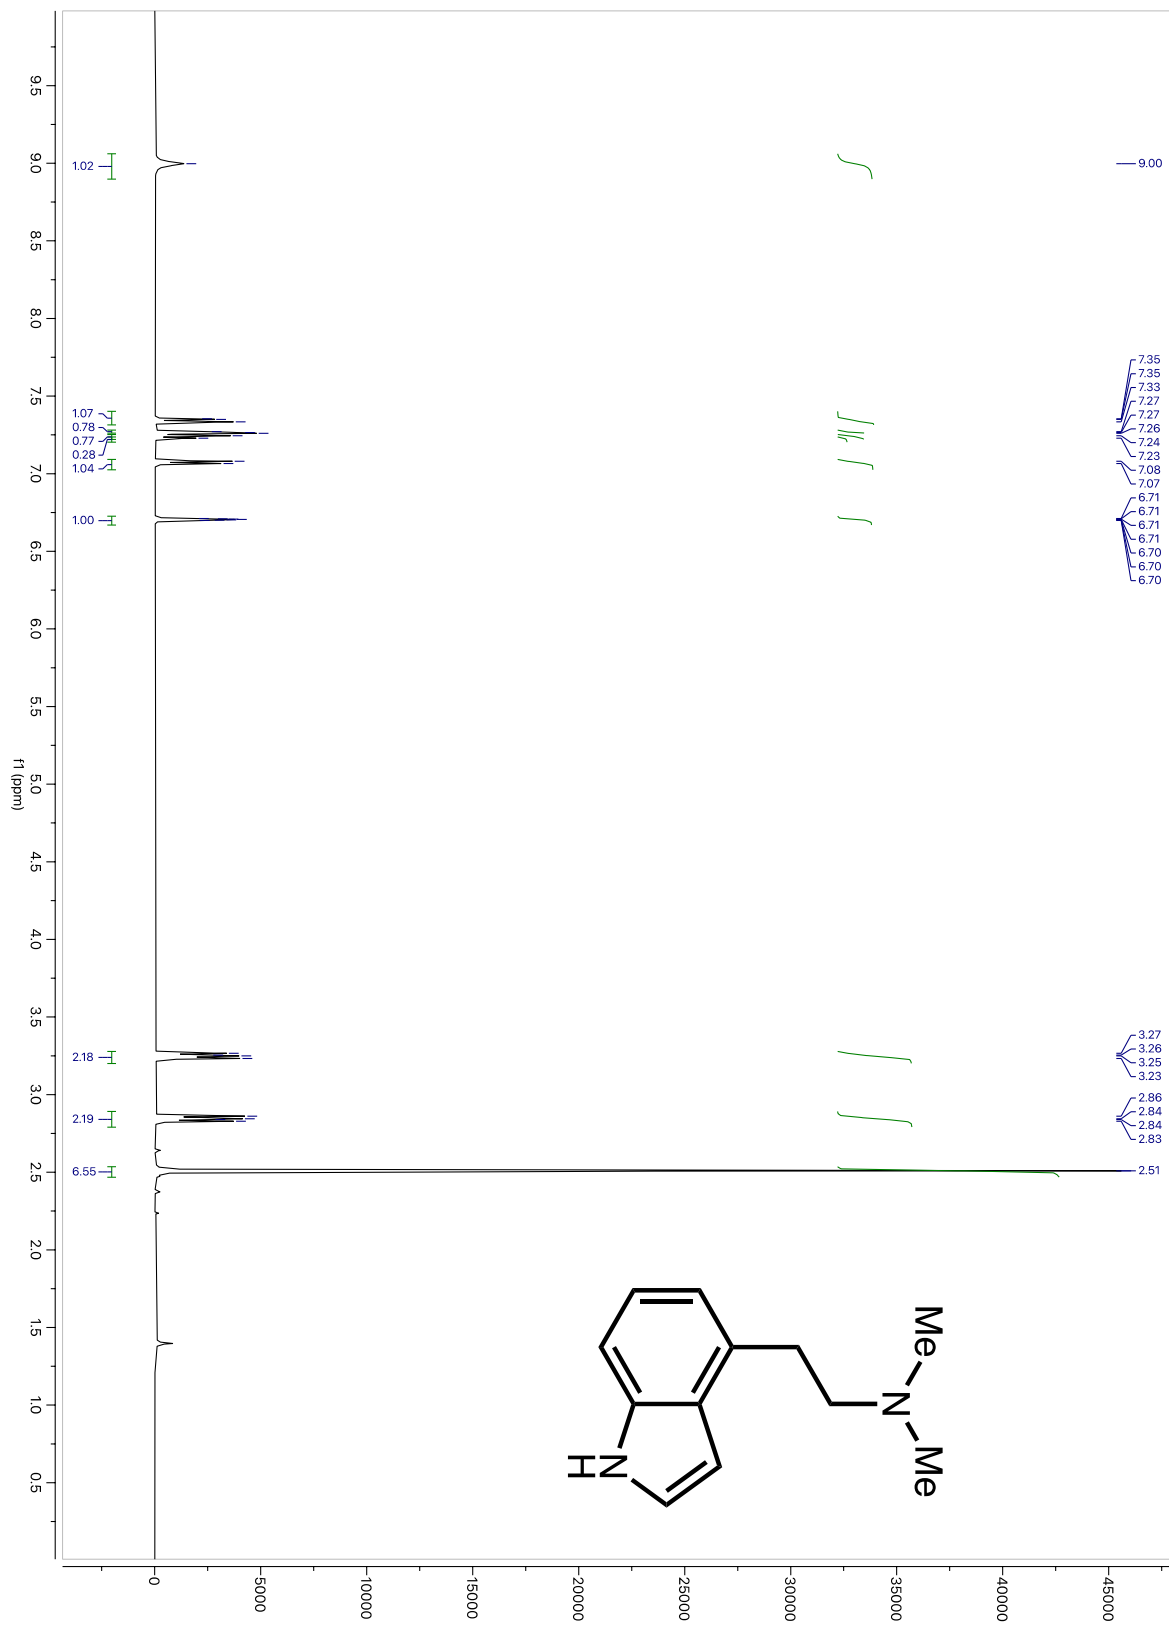

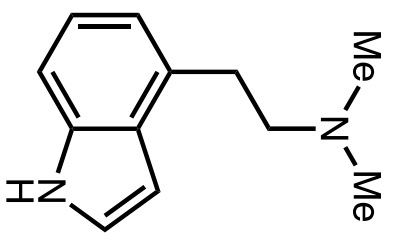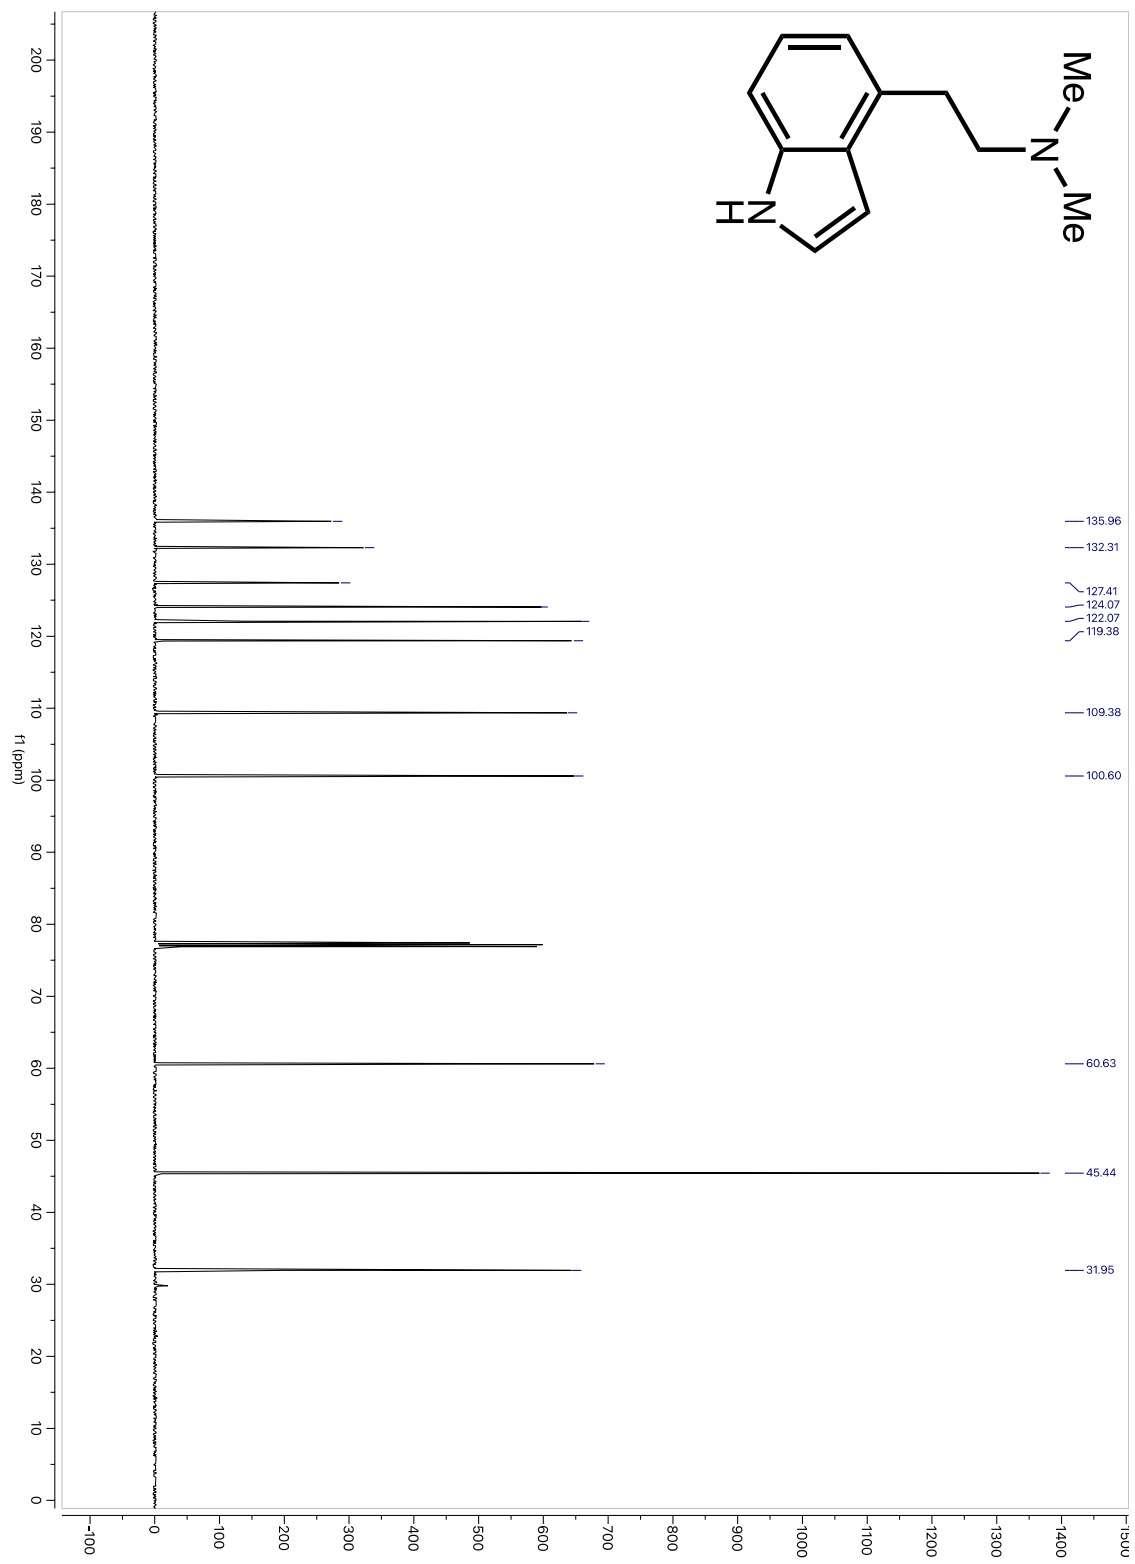



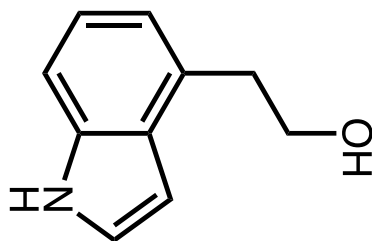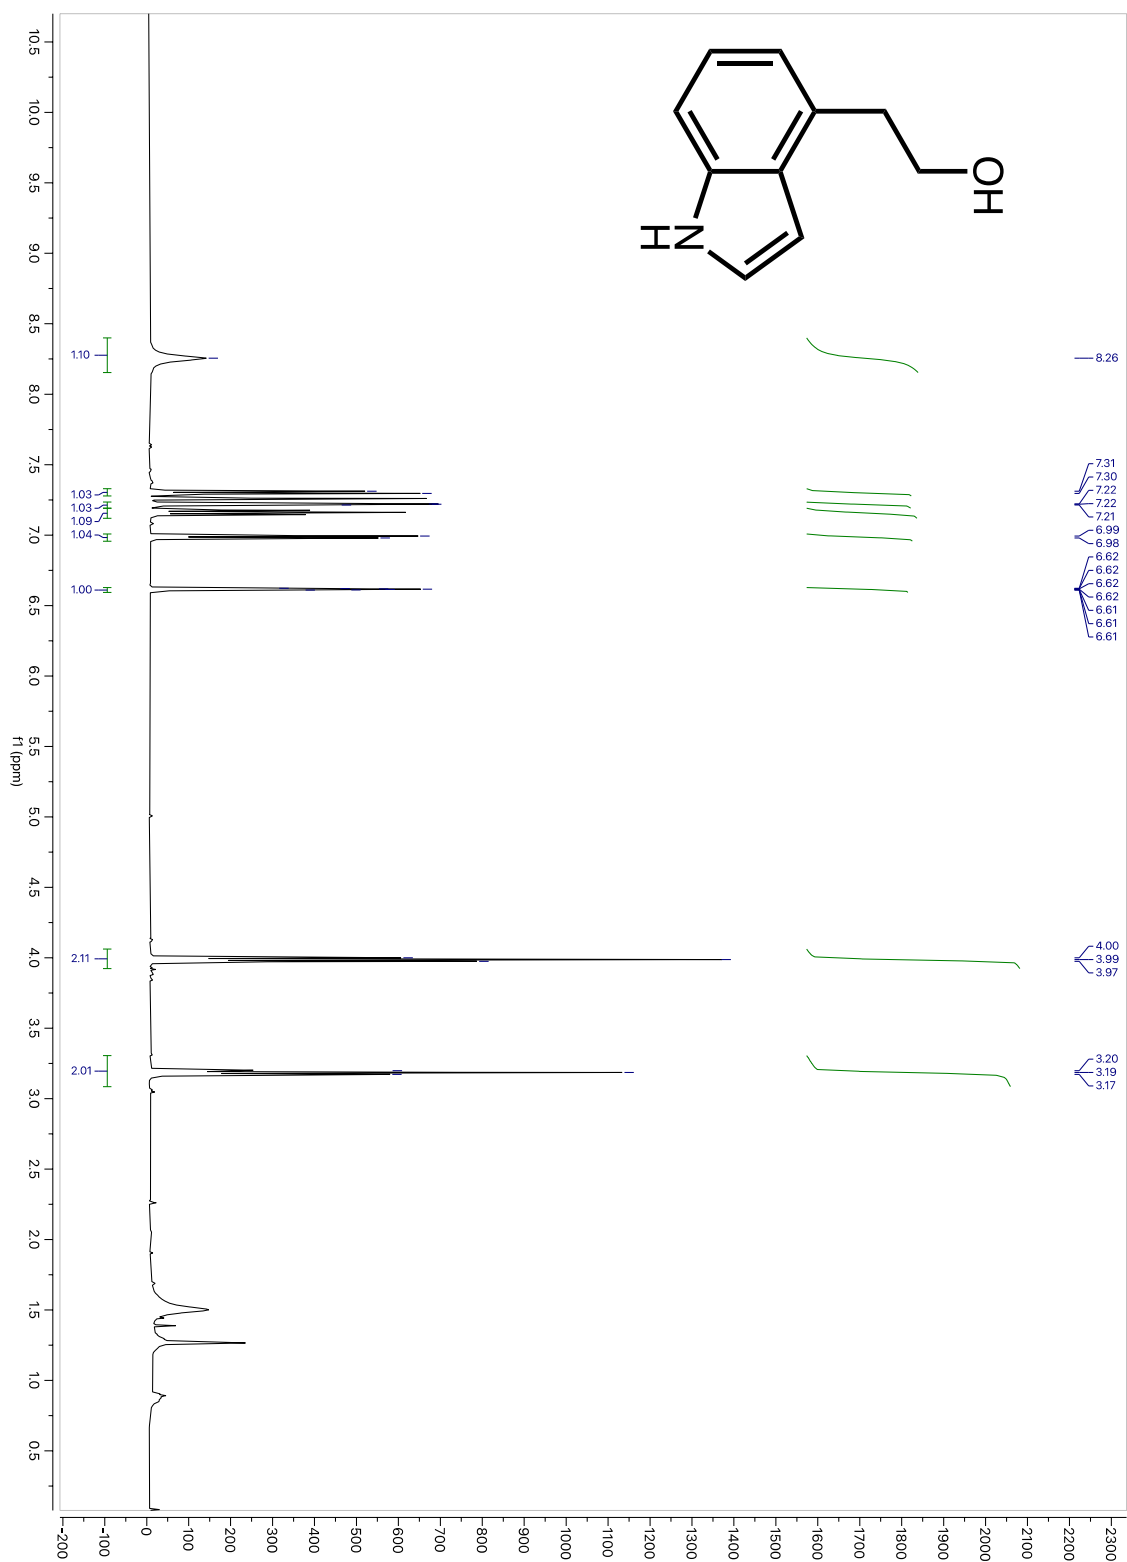

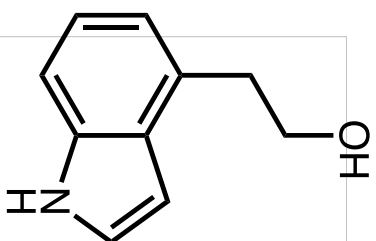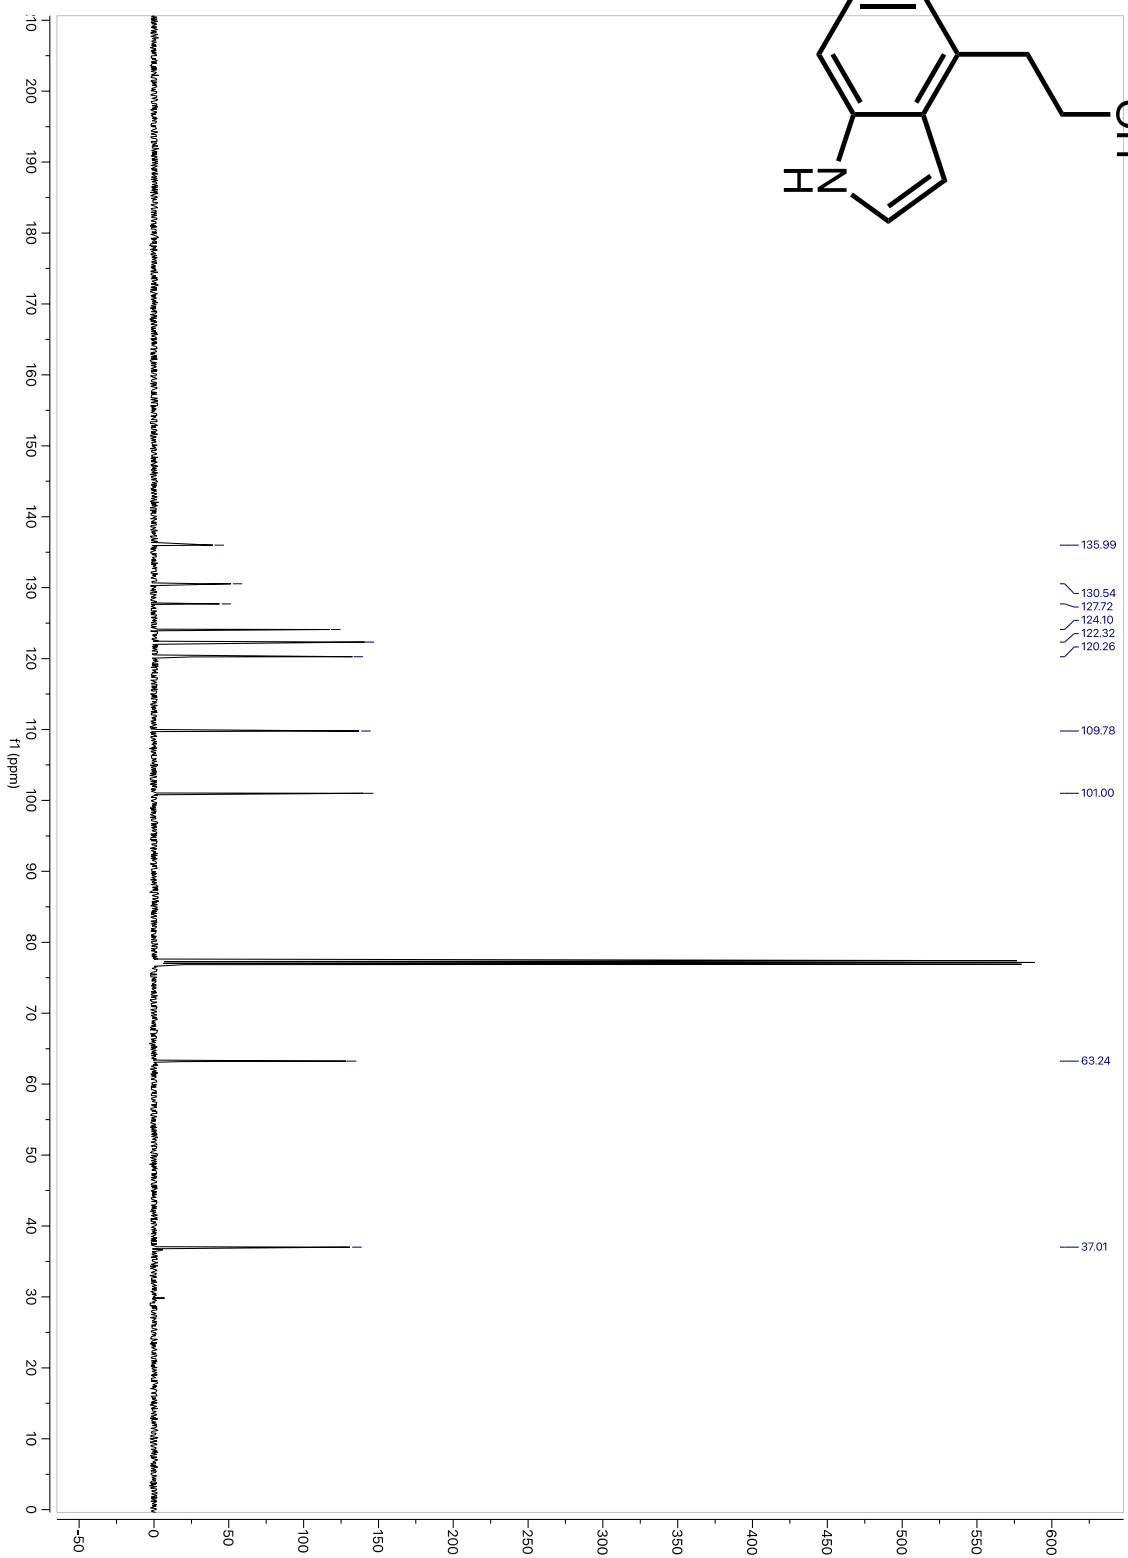

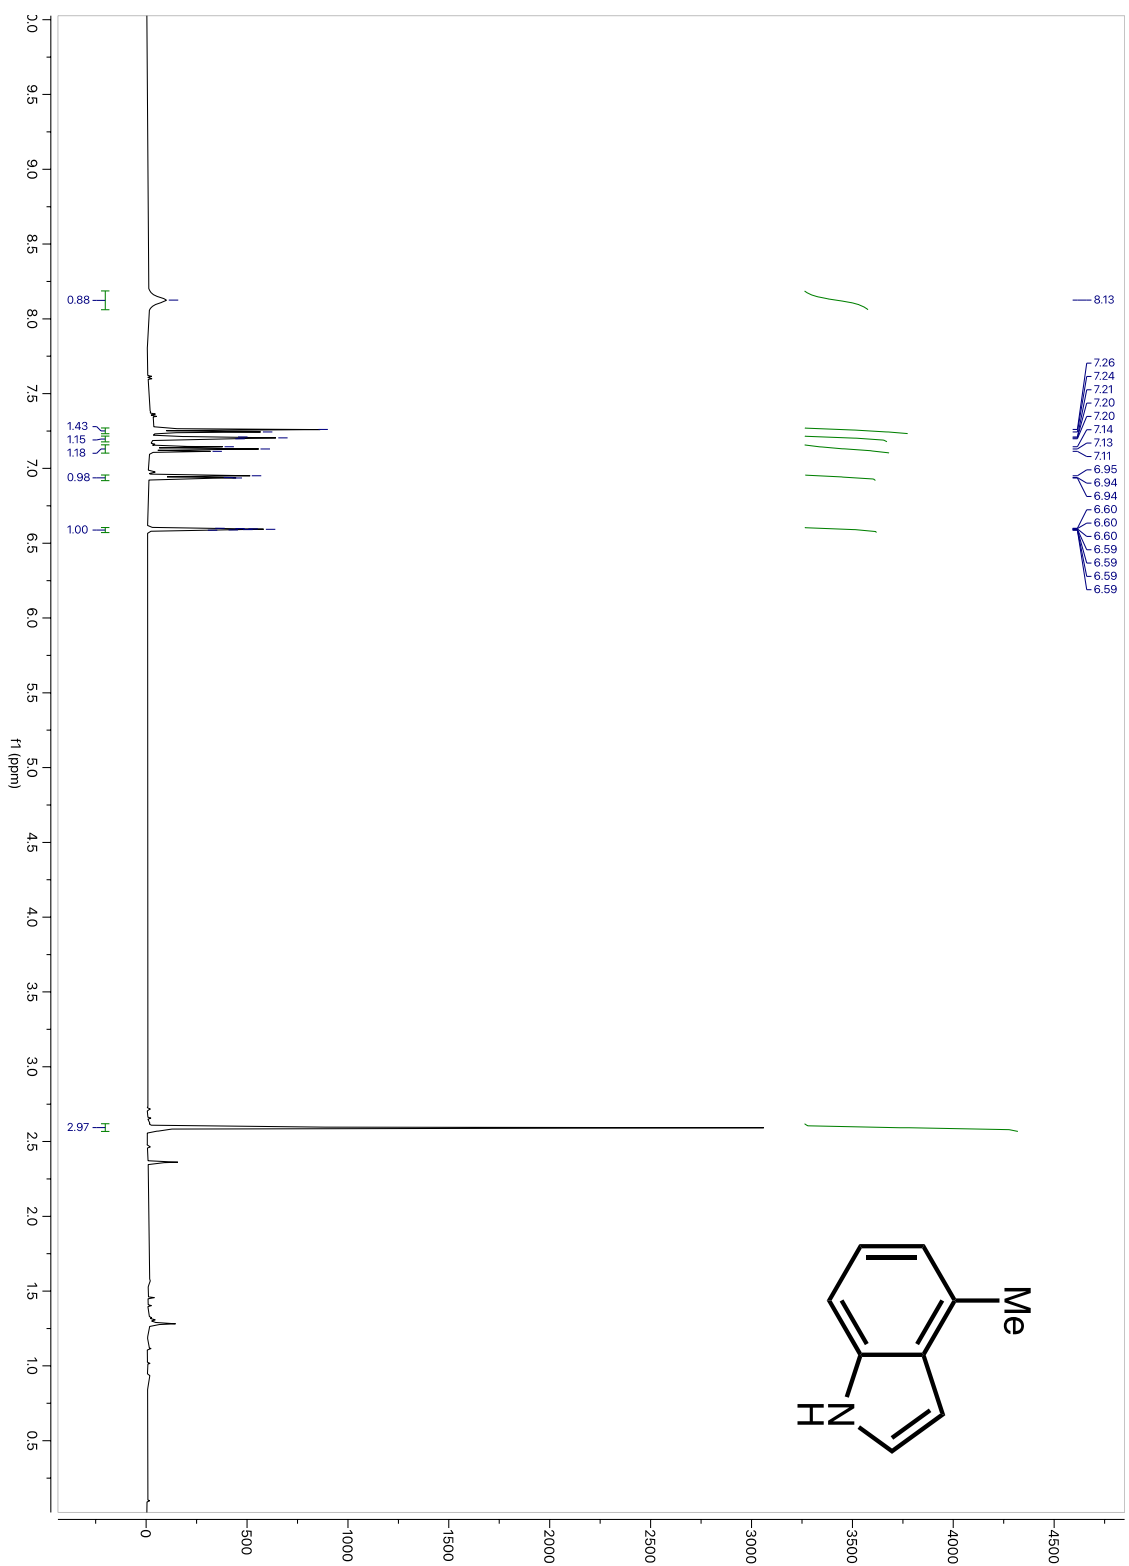

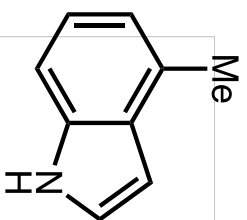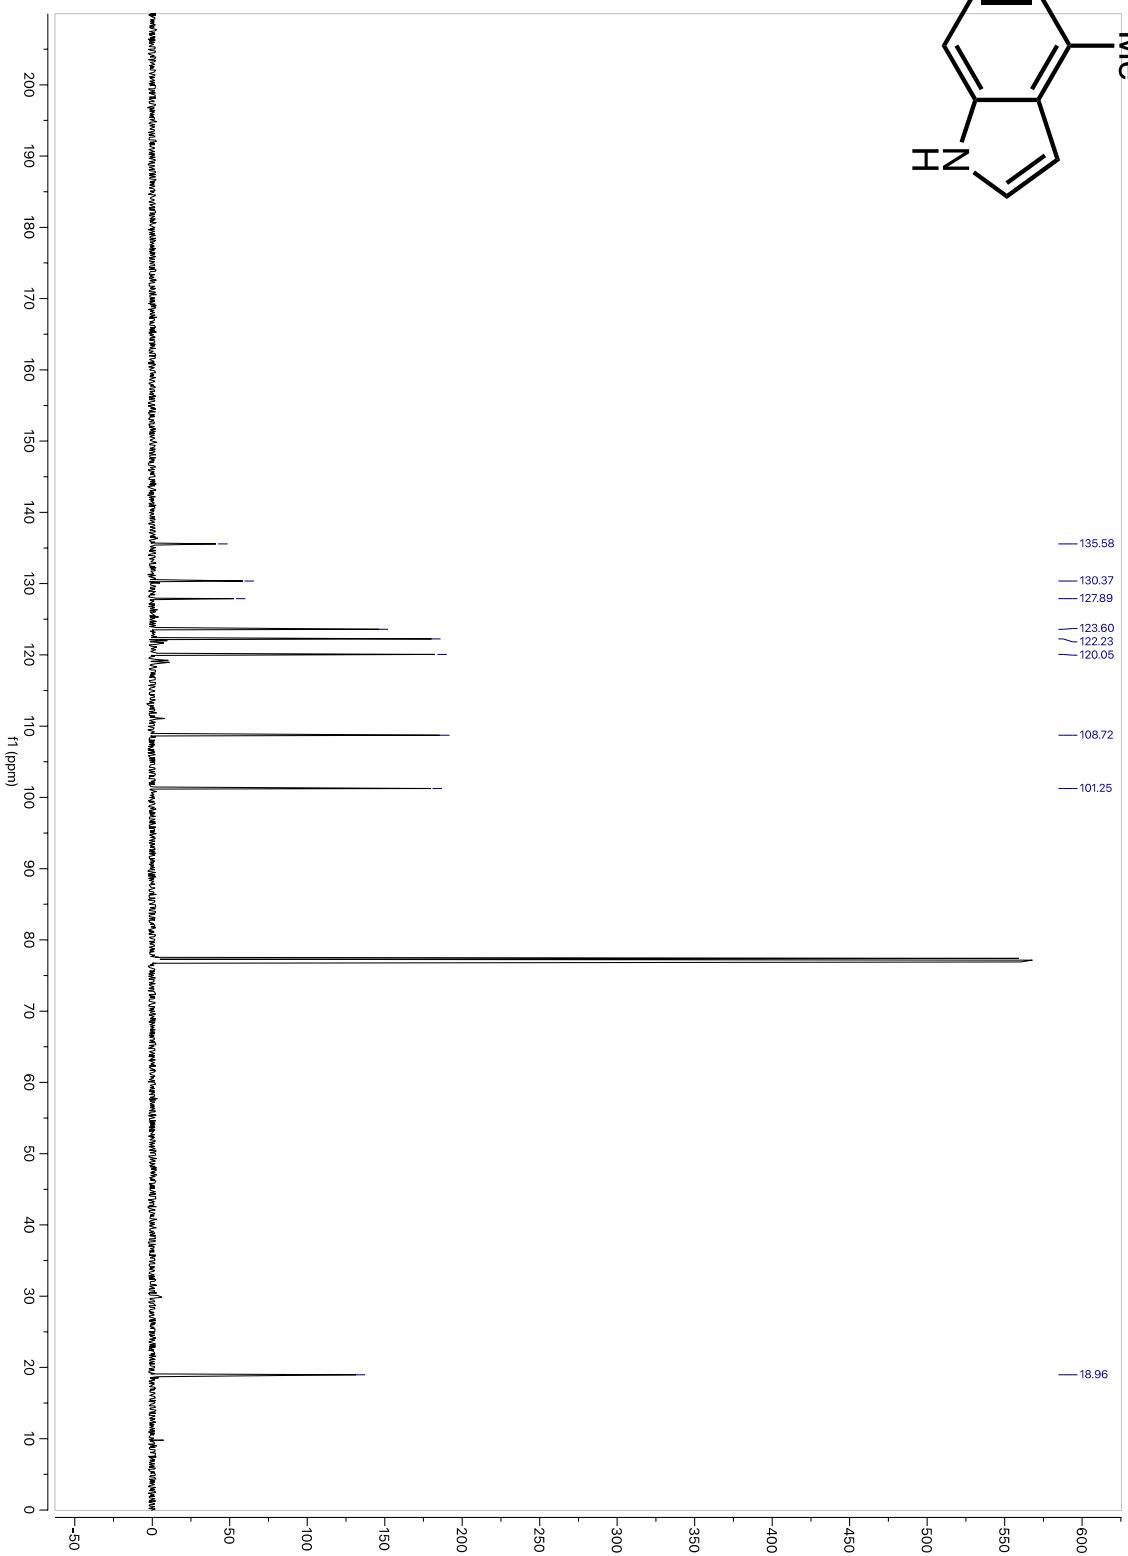

Supplement: Supplementary file 1 [file 9f9ffb36978029ffa0e8f61d.pdf]
